# Supplementary material
Source: publisher figshare collection journal article supplement (https://gsajournals.figshare.com/ndownloader/files/30972949)
Supplement: Supplementary file 1 [file 30972949]

## Sheet: Table S1
Table S1: Genes differentially expressed in response to HA in D. melanogaster
test_id	gene_id	gene	locus	sample_1	sample_2	status	value_1	value_2	log2(fold_change)	test_stat	p_value	q_value	significant	direction	Flybase Gene ID	KEGG Gene ID
gene:FBgn0000003	gene:FBgn0000003	7SLRNA:CR32864	3R:6822497-6822796	Control	HA	OK	111.918	61.0259	-0.874943	-3.23545	5e-05	0.00173879	yes	down	FBgn0000003	dme:Dmel_CR32864
gene:FBgn0000078	gene:FBgn0000078	Amy-d	2R:17124763-17126369	Control	HA	OK	178.035	122.264	-0.542159	-2.782	5e-05	0.00173879	yes	down	FBgn0000078	dme:Dmel_CG17876
gene:FBgn0000279	gene:FBgn0000279	CecC	3R:30216483-30216938	Control	HA	OK	15.0892	3.37534	-2.16041	-3.15892	5e-05	0.00173879	yes	down	FBgn0000279	dme:Dmel_CG1373
gene:FBgn0000356	gene:FBgn0000356	Cp16	3L:8731943-8732599	Control	HA	OK	1082.64	414.169	-1.38626	-5.90887	5e-05	0.00173879	yes	down	FBgn0000356	dme:Dmel_CG6533
gene:FBgn0000357	gene:FBgn0000357	Cp18	3L:8726790-8727613	Control	HA	OK	932.331	345.118	-1.43375	-5.22073	5e-05	0.00173879	yes	down	FBgn0000357	dme:Dmel_CG6517
gene:FBgn0000358	gene:FBgn0000358	Cp19	3L:8729864-8730604	Control	HA	OK	1587.79	597.089	-1.41101	-5.95704	5e-05	0.00173879	yes	down	FBgn0000358	dme:Dmel_CG6524
gene:FBgn0000477	gene:FBgn0000477	DNaseII	3R:18019374-18021161	Control	HA	OK	27.5961	17.5748	-0.65096	-2.94364	5e-05	0.00173879	yes	down	FBgn0000477	dme:Dmel_CG7780
gene:FBgn0000592	gene:FBgn0000592	Est-6	3L:12188817-12193688	Control	HA	OK	56.5552	38.117	-0.569224	-2.48978	5e-05	0.00173879	yes	down	FBgn0000592	dme:Dmel_CG6917
gene:FBgn0002521	gene:FBgn0002521	pho	4:1172468-1181628	Control	HA	OK	73.603	51.2622	-0.521868	-2.70315	5e-05	0.00173879	yes	down	FBgn0002521	dme:Dmel_CG17743
gene:FBgn0002565	gene:FBgn0002565	Lsp2	3L:12129102-12131869	Control	HA	OK	71.1735	42.9345	-0.729204	-3.55026	5e-05	0.00173879	yes	down	FBgn0002565	dme:Dmel_CG6806
gene:FBgn0002939	gene:FBgn0002939	ninaD	2L:18081627-18083608	Control	HA	OK	20.26	13.0234	-0.637522	-2.82634	5e-05	0.00173879	yes	down	FBgn0002939	dme:Dmel_CG31783
gene:FBgn0003256	gene:FBgn0003256	rl	2R:1071461-1125927	Control	HA	OK	96.7174	56.3919	-0.778288	-3.99139	5e-05	0.00173879	yes	down	FBgn0003256	dme:Dmel_CG12559
gene:FBgn0003358	gene:FBgn0003358	Jon99Ci	3R:29925225-29926189	Control	HA	OK	133.939	61.0067	-1.13453	-5.8125	5e-05	0.00173879	yes	down	FBgn0003358	dme:Dmel_CG31039
gene:FBgn0003714	gene:FBgn0003714	tko	X:2442312-2443976	Control	HA	OK	247.955	171.841	-0.529005	-2.58282	5e-05	0.00173879	yes	down	FBgn0003714	dme:Dmel_CG7925
gene:FBgn0004228	gene:FBgn0004228	mex1	3L:15517423-15519592	Control	HA	OK	33.2408	19.1004	-0.79935	-3.28716	5e-05	0.00173879	yes	down	FBgn0004228	dme:Dmel_CG7936
gene:FBgn0004240	gene:FBgn0004240	DptA	2R:18865764-18866260	Control	HA	OK	56.5677	25.619	-1.14276	-3.3619	5e-05	0.00173879	yes	down	FBgn0004240	dme:Dmel_CG12763
gene:FBgn0004915	gene:FBgn0004915	TfIIB	2L:10431337-10435656	Control	HA	OK	47.5512	30.2758	-0.651319	-2.90882	5e-05	0.00173879	yes	down	FBgn0004915	dme:Dmel_CG5193
gene:FBgn0004921	gene:FBgn0004921	Ggamma1	2R:8901403-8904791	Control	HA	OK	422.143	271.388	-0.637375	-2.42952	5e-05	0.00173879	yes	down	FBgn0004921	dme:Dmel_CG8261
gene:FBgn0005672	gene:FBgn0005672	spi	2L:19567899-19577315	Control	HA	OK	48.4947	31.7968	-0.608945	-2.97265	5e-05	0.00173879	yes	down	FBgn0005672	dme:Dmel_CG10334
gene:FBgn0010401	gene:FBgn0010401	Os-C	3R:7978958-7980322	Control	HA	OK	35.8543	20.539	-0.803778	-2.51566	5e-05	0.00173879	yes	down	FBgn0010401	dme:Dmel_CG3250
gene:FBgn0011293	gene:FBgn0011293	a10	3L:17023122-17023741	Control	HA	OK	45.7521	27.9709	-0.709908	-2.72941	5e-05	0.00173879	yes	down	FBgn0011293	dme:Dmel_CG6642
gene:FBgn0011555	gene:FBgn0011555	thetaTry	2R:11341713-11342760	Control	HA	OK	88.7122	58.3404	-0.604638	-3.06104	5e-05	0.00173879	yes	down	FBgn0011555	dme:Dmel_CG12385
gene:FBgn0011556	gene:FBgn0011556	zetaTry	2R:11339185-11340132	Control	HA	OK	69.1043	46.5894	-0.568773	-2.73215	5e-05	0.00173879	yes	down	FBgn0011556	dme:Dmel_CG12387
gene:FBgn0011834	gene:FBgn0011834	Ser6	X:20962604-20963505	Control	HA	OK	65.5965	44.2357	-0.568407	-2.71684	5e-05	0.00173879	yes	down	FBgn0011834	dme:Dmel_CG2071
gene:FBgn0012042	gene:FBgn0012042	AttA	2R:14747361-14748215	Control	HA	OK	13.2594	5.11844	-1.37324	-3.85663	5e-05	0.00173879	yes	down	FBgn0012042	dme:Dmel_CG10146
gene:FBgn0013348	gene:FBgn0013348	TpnC41C	2R:5065236-5070210	Control	HA	OK	410.904	294.236	-0.481828	-2.31504	5e-05	0.00173879	yes	down	FBgn0013348	dme:Dmel_CG2981
gene:FBgn0013467	gene:FBgn0013467	igl	2R:15155436-15190292	Control	HA	OK	27.683	19.9473	-0.472808	-2.37552	5e-05	0.00173879	yes	down	FBgn0013467	dme:Dmel_CG18285
gene:FBgn0013688	gene:FBgn0013688	mt:srRNA	mitochondrion_genome:14130-14916	Control	HA	OK	102.551	64.6405	-0.665833	-4.04736	5e-05	0.00173879	yes	down	FBgn0013688	dme:srRNA
gene:FBgn0013749	gene:FBgn0013749	Arf102F	4:1124166-1125325	Control	HA	OK	226.201	152.705	-0.566858	-2.78674	5e-05	0.00173879	yes	down	FBgn0013749	dme:Dmel_CG11027
gene:FBgn0014391	gene:FBgn0014391	sun	X:15847858-15849258	Control	HA	OK	2308.07	1513.83	-0.608482	-2.93621	5e-05	0.00173879	yes	down	FBgn0014391	dme:Dmel_CG9032
gene:FBgn0015001	gene:FBgn0015001	iotaTry	2R:11356719-11357537	Control	HA	OK	38.3308	25.0004	-0.616551	-2.6387	5e-05	0.00173879	yes	down	FBgn0015001	dme:Dmel_CG7754
gene:FBgn0015035	gene:FBgn0015035	Cyp4e3	2L:9747838-9750071	Control	HA	OK	15.1636	6.72526	-1.17295	-4.68097	5e-05	0.00173879	yes	down	FBgn0015035	dme:Dmel_CG4105
gene:FBgn0015039	gene:FBgn0015039	Cyp9b2	2R:7130276-7132139	Control	HA	OK	2.05425	0.789007	-1.38051	-2.73059	5e-05	0.00173879	yes	down	FBgn0015039	dme:Dmel_CG4486
gene:FBgn0015777	gene:FBgn0015777	nrv2	2L:6789769-6798862	Control	HA	OK	90.1782	65.4193	-0.463063	-2.3258	5e-05	0.00173879	yes	down	FBgn0015777	dme:Dmel_CG9261
gene:FBgn0016126	gene:FBgn0016126	CaMKI	4:445503-453947	Control	HA	OK	127.382	78.9107	-0.690869	-3.51179	5e-05	0.00173879	yes	down	FBgn0016126	dme:Dmel_CG1495
gene:FBgn0020906	gene:FBgn0020906	Jon25Bi	2L:4954278-4955144	Control	HA	OK	377.108	214.531	-0.813796	-4.40519	5e-05	0.00173879	yes	down	FBgn0020906	dme:Dmel_CG8867
gene:FBgn0020908	gene:FBgn0020908	Scp1	2R:2932594-2968052	Control	HA	OK	2963.56	1655	-0.840495	-3.39716	5e-05	0.00173879	yes	down	FBgn0020908	dme:Dmel_CG15848
gene:FBgn0024289	gene:FBgn0024289	Sodh-1	3R:7052334-7054541	Control	HA	OK	48.286	27.2909	-0.823188	-3.79673	5e-05	0.00173879	yes	down	FBgn0024289	dme:Dmel_CG1982
gene:FBgn0024804	gene:FBgn0024804	Dbp80	3L:27279315-27422159	Control	HA	OK	113.274	65.4368	-0.791643	-3.95407	5e-05	0.00173879	yes	down	FBgn0024804	dme:Dmel_CG17023
gene:FBgn0024811	gene:FBgn0024811	Crk	4:210223-213165	Control	HA	OK	138.382	87.9894	-0.653252	-3.34724	5e-05	0.00173879	yes	down	FBgn0024811	dme:Dmel_CG1587
gene:FBgn0025583	gene:FBgn0025583	IM2	2R:18386601-18387030	Control	HA	OK	1341.84	937.71	-0.516995	-2.60745	5e-05	0.00173879	yes	down	FBgn0025583	dme:Dmel_CG18106
gene:FBgn0026199	gene:FBgn0026199	myo	4:690685-696055	Control	HA	OK	35.4092	18.4256	-0.942413	-4.7542	5e-05	0.00173879	yes	down	FBgn0026199	dme:Dmel_CG1838
gene:FBgn0026563	gene:FBgn0026563	CG1979	3R:7054585-7058671	Control	HA	OK	0.812633	0.318948	-1.34928	-2.57978	5e-05	0.00173879	yes	down	FBgn0026563	dme:Dmel_CG1979
gene:FBgn0026565	gene:FBgn0026565	CG1315	3R:6641231-6644434	Control	HA	OK	27.9829	19.1167	-0.549709	-2.48982	5e-05	0.00173879	yes	down	FBgn0026565	dme:Dmel_CG1315
gene:FBgn0027052	gene:FBgn0027052	STUB1	2L:10437547-10439240	Control	HA	OK	51.1681	34.453	-0.570615	-2.82898	5e-05	0.00173879	yes	down	FBgn0027052	dme:Dmel_CG5203
gene:FBgn0028396	gene:FBgn0028396	TotA	3R:20871035-20871700	Control	HA	OK	152.895	38.072	-2.00574	-8.6962	5e-05	0.00173879	yes	down	FBgn0028396	dme:Dmel_CG31509
gene:FBgn0028583	gene:FBgn0028583	lcs	X:21396726-21397316	Control	HA	OK	849.072	432.047	-0.974699	-4.89944	5e-05	0.00173879	yes	down	FBgn0028583	dme:Dmel_CG12794
gene:FBgn0028663	gene:FBgn0028663	VhaM9.7-b	3L:21539861-21541215	Control	HA	OK	293.336	188.795	-0.635737	-3.16029	5e-05	0.00173879	yes	down	FBgn0028663	dme:Dmel_CG7625
gene:FBgn0028950	gene:FBgn0028950	CG15255	2L:15610170-15611719	Control	HA	OK	99.1077	58.3598	-0.764023	-3.71247	5e-05	0.00173879	yes	down	FBgn0028950	dme:Dmel_CG15255
gene:FBgn0029147	gene:FBgn0029147	NtR	2R:22127807-22131299	Control	HA	OK	4.54381	2.46257	-0.88374	-2.59035	5e-05	0.00173879	yes	down	FBgn0029147	dme:Dmel_CG6698
gene:FBgn0029849	gene:FBgn0029849	Efr	X:6219956-6222719	Control	HA	OK	29.0461	20.5349	-0.500266	-2.40415	5e-05	0.00173879	yes	down	FBgn0029849	dme:Dmel_CG3774
gene:FBgn0030098	gene:FBgn0030098	CG12057	X:9191656-9192548	Control	HA	OK	1519.23	939.38	-0.693562	-3.24024	5e-05	0.00173879	yes	down	FBgn0030098	dme:Dmel_CG12057
gene:FBgn0030258	gene:FBgn0030258	CG1552	X:11052170-11053556	Control	HA	OK	34.3926	20.6063	-0.739014	-2.89138	5e-05	0.00173879	yes	down	FBgn0030258	dme:Dmel_CG1552
gene:FBgn0030304	gene:FBgn0030304	Cyp4g15	X:11477057-11483233	Control	HA	OK	7.00338	4.52039	-0.631603	-2.38916	5e-05	0.00173879	yes	down	FBgn0030304	dme:Dmel_CG11715
gene:FBgn0030334	gene:FBgn0030334	Karl	X:11787380-11792253	Control	HA	OK	15.9061	10.37	-0.617159	-2.40261	5e-05	0.00173879	yes	down	FBgn0030334	dme:Dmel_CG4139
gene:FBgn0030357	gene:FBgn0030357	Sclp	X:11920003-11924662	Control	HA	OK	52.9628	36.4415	-0.539394	-2.39581	5e-05	0.00173879	yes	down	FBgn0030357	dme:Dmel_CG2471
gene:FBgn0030519	gene:FBgn0030519	CG11151	X:13736569-13744683	Control	HA	OK	347.101	212.63	-0.707011	-2.47063	5e-05	0.00173879	yes	down	FBgn0030519	dme:Dmel_CG11151
gene:FBgn0030558	gene:FBgn0030558	CG1461	X:14261222-14266250	Control	HA	OK	41.8762	29.0178	-0.529194	-2.50794	5e-05	0.00173879	yes	down	FBgn0030558	dme:Dmel_CG1461
gene:FBgn0030657	gene:FBgn0030657	cerv	X:15576985-15578171	Control	HA	OK	37.2293	25.7135	-0.533913	-2.20437	5e-05	0.00173879	yes	down	FBgn0030657	dme:Dmel_CG15645
gene:FBgn0030703	gene:FBgn0030703	MSBP	X:15887566-15890109	Control	HA	OK	312.85	221.047	-0.501115	-2.44795	5e-05	0.00173879	yes	down	FBgn0030703	dme:Dmel_CG9066
gene:FBgn0030985	gene:FBgn0030985	Obp18a	X:19135080-19135868	Control	HA	OK	43.9279	27.9909	-0.650177	-2.9659	5e-05	0.00173879	yes	down	FBgn0030985	dme:Dmel_CG15883
gene:FBgn0031268	gene:FBgn0031268	cold	2L:574290-576896	Control	HA	OK	55.4154	36.7054	-0.594297	-2.85299	5e-05	0.00173879	yes	down	FBgn0031268	dme:Dmel_CG2813
gene:FBgn0031277	gene:FBgn0031277	CG13947	2L:779172-779655	Control	HA	OK	53.3948	20.7865	-1.36105	-4.84856	5e-05	0.00173879	yes	down	FBgn0031277	dme:Dmel_CG13947
gene:FBgn0031313	gene:FBgn0031313	CG5080	2L:1160289-1163886	Control	HA	OK	50.0652	32.8851	-0.606376	-2.9673	5e-05	0.00173879	yes	down	FBgn0031313	dme:Dmel_CG5080
gene:FBgn0031406	gene:FBgn0031406	Send1	2L:2254175-2255050	Control	HA	OK	153.359	100.963	-0.603092	-2.9018	5e-05	0.00173879	yes	down	FBgn0031406	dme:Dmel_CG17012
gene:FBgn0031561	gene:FBgn0031561	IM33	2L:3696217-3696658	Control	HA	OK	1587.55	1140.77	-0.476792	-2.33719	5e-05	0.00173879	yes	down	FBgn0031561	dme:Dmel_CG16712
gene:FBgn0031579	gene:FBgn0031579	CG15422	2L:4004983-4005670	Control	HA	OK	53.1998	29.7626	-0.837919	-3.75207	5e-05	0.00173879	yes	down	FBgn0031579	dme:Dmel_CG15422
gene:FBgn0031580	gene:FBgn0031580	CG15423	2L:4006040-4006606	Control	HA	OK	100.883	66.7375	-0.596117	-2.6801	5e-05	0.00173879	yes	down	FBgn0031580	dme:Dmel_CG15423
gene:FBgn0031636	gene:FBgn0031636	CG12194	2L:4838346-4841465	Control	HA	OK	6.90847	4.18496	-0.723153	-2.75475	5e-05	0.00173879	yes	down	FBgn0031636	dme:Dmel_CG12194
gene:FBgn0031654	gene:FBgn0031654	Jon25Bii	2L:4952242-4953136	Control	HA	OK	275.111	163.086	-0.754383	-4.09975	5e-05	0.00173879	yes	down	FBgn0031654	dme:Dmel_CG8869
gene:FBgn0031689	gene:FBgn0031689	Cyp28d1	2L:5210459-5215081	Control	HA	OK	16.8066	10.4311	-0.688135	-2.9626	5e-05	0.00173879	yes	down	FBgn0031689	dme:Dmel_CG10833
gene:FBgn0031701	gene:FBgn0031701	TotM	2L:5329856-5330464	Control	HA	OK	90.9328	49.5908	-0.874729	-3.79882	5e-05	0.00173879	yes	down	FBgn0031701	dme:Dmel_CG14027
gene:FBgn0031882	gene:FBgn0031882	Rab30	2L:7030492-7032606	Control	HA	OK	14.4101	10.2124	-0.496756	-2.23393	5e-05	0.00173879	yes	down	FBgn0031882	dme:Dmel_CG9100
gene:FBgn0031907	gene:FBgn0031907	CG5171	2L:7401334-7404727	Control	HA	OK	84.8921	56.768	-0.58055	-2.92208	5e-05	0.00173879	yes	down	FBgn0031907	dme:Dmel_CG5171
gene:FBgn0031910	gene:FBgn0031910	CG15818	2L:7410908-7412229	Control	HA	OK	25.7047	17.6583	-0.541681	-2.44188	5e-05	0.00173879	yes	down	FBgn0031910	dme:Dmel_CG15818
gene:FBgn0031929	gene:FBgn0031929	CG18585	2L:7642004-7691061	Control	HA	OK	49.2056	31.49	-0.643926	-2.35368	5e-05	0.00173879	yes	down	FBgn0031929	dme:Dmel_CG18585
gene:FBgn0031935	gene:FBgn0031935	CG13793	2L:7716973-7719487	Control	HA	OK	6.33732	3.96527	-0.676454	-2.62319	5e-05	0.00173879	yes	down	FBgn0031935	dme:Dmel_CG13793
gene:FBgn0031936	gene:FBgn0031936	CG13794	2L:7719846-7722823	Control	HA	OK	6.93475	3.92402	-0.821513	-3.23423	5e-05	0.00173879	yes	down	FBgn0031936	dme:Dmel_CG13794
gene:FBgn0032055	gene:FBgn0032055	CG13091	2L:8519689-8521809	Control	HA	OK	11.6199	7.78946	-0.576998	-2.24655	5e-05	0.00173879	yes	down	FBgn0032055	dme:Dmel_CG13091
gene:FBgn0032084	gene:FBgn0032084	CG13101	2L:8977833-8984872	Control	HA	OK	15.1421	9.87343	-0.616939	-2.56731	5e-05	0.00173879	yes	down	FBgn0032084	dme:Dmel_CG13101
gene:FBgn0032085	gene:FBgn0032085	CG9555	2L:8991734-8993632	Control	HA	OK	10.1785	5.7617	-0.820951	-2.91493	5e-05	0.00173879	yes	down	FBgn0032085	dme:Dmel_CG9555
gene:FBgn0032087	gene:FBgn0032087	CG9568	2L:9010582-9011358	Control	HA	OK	109.01	72.7935	-0.582578	-2.81368	5e-05	0.00173879	yes	down	FBgn0032087	dme:Dmel_CG9568
gene:FBgn0032126	gene:FBgn0032126	CG13113	2L:9544170-9544875	Control	HA	OK	40.6685	24.7194	-0.718265	-2.75986	5e-05	0.00173879	yes	down	FBgn0032126	dme:Dmel_CG13113
gene:FBgn0032127	gene:FBgn0032127	CG13114	2L:9545810-9547424	Control	HA	OK	177.401	113.047	-0.650089	-3.20214	5e-05	0.00173879	yes	down	FBgn0032127	dme:Dmel_CG13114
gene:FBgn0032193	gene:FBgn0032193	CG5727	2L:10209852-10210681	Control	HA	OK	50.246	31.1608	-0.689275	-2.91769	5e-05	0.00173879	yes	down	FBgn0032193	dme:Dmel_CG5727
gene:FBgn0032200	gene:FBgn0032200	CG5676	2L:10251842-10255891	Control	HA	OK	184.717	106.524	-0.794132	-3.97847	5e-05	0.00173879	yes	down	FBgn0032200	dme:Dmel_CG5676
gene:FBgn0032264	gene:FBgn0032264	Lip4	2L:10527571-10531778	Control	HA	OK	31.8727	21.3902	-0.575369	-2.74695	5e-05	0.00173879	yes	down	FBgn0032264	dme:Dmel_CG6113
gene:FBgn0032266	gene:FBgn0032266	CG18302	2L:10534321-10536587	Control	HA	OK	2.12847	0.996033	-1.09555	-2.74576	5e-05	0.00173879	yes	down	FBgn0032266	dme:Dmel_CG18302
gene:FBgn0032400	gene:FBgn0032400	CG6770	2L:12045342-12046118	Control	HA	OK	5648.44	3399.12	-0.73269	-3.05985	5e-05	0.00173879	yes	down	FBgn0032400	dme:Dmel_CG6770
gene:FBgn0032453	gene:FBgn0032453	CG6180	2L:12706798-12708680	Control	HA	OK	350.662	254.256	-0.4638	-2.27219	5e-05	0.00173879	yes	down	FBgn0032453	dme:Dmel_CG6180
gene:FBgn0032472	gene:FBgn0032472	CG9928	2L:13142444-13142903	Control	HA	OK	521.844	339.051	-0.622117	-3.06672	5e-05	0.00173879	yes	down	FBgn0032472	dme:Dmel_CG9928
gene:FBgn0032505	gene:FBgn0032505	CG16826	2L:13347772-13349020	Control	HA	OK	2223.78	1474.27	-0.59302	-2.47162	5e-05	0.00173879	yes	down	FBgn0032505	dme:Dmel_CG16826
gene:FBgn0032613	gene:FBgn0032613	CG13283	2L:16835135-16837258	Control	HA	OK	4.4502	2.43161	-0.871959	-2.77778	5e-05	0.00173879	yes	down	FBgn0032613	dme:Dmel_CG13283
gene:FBgn0032682	gene:FBgn0032682	grnd	2L:18485416-18503978	Control	HA	OK	6.9207	3.50287	-0.982382	-3.06123	5e-05	0.00173879	yes	down	FBgn0032682	dme:Dmel_CG10176
gene:FBgn0032788	gene:FBgn0032788	CG13084	2L:19484929-19486532	Control	HA	OK	49.118	25.7922	-0.929315	-3.96685	5e-05	0.00173879	yes	down	FBgn0032788	dme:Dmel_CG13084
gene:FBgn0032789	gene:FBgn0032789	CG13083	2L:19487489-19490104	Control	HA	OK	86.8574	44.3579	-0.969457	-2.78502	5e-05	0.00173879	yes	down	FBgn0032789	dme:Dmel_CG13083
gene:FBgn0032913	gene:FBgn0032913	CG9259	2L:21089374-21090999	Control	HA	OK	116.519	86.3419	-0.432431	-2.15215	5e-05	0.00173879	yes	down	FBgn0032913	dme:Dmel_CG9259
gene:FBgn0032973	gene:FBgn0032973	CG6675	2L:22108963-22110449	Control	HA	OK	6.38214	3.35904	-0.925991	-2.67518	5e-05	0.00173879	yes	down	FBgn0032973	dme:Dmel_CG6675
gene:FBgn0033010	gene:FBgn0033010	Atf6	2R:5144732-5154756	Control	HA	OK	38.6379	21.1377	-0.870202	-4.48496	5e-05	0.00173879	yes	down	FBgn0033010	dme:Dmel_CG3136
gene:FBgn0033019	gene:FBgn0033019	CG10395	2R:5350476-5352122	Control	HA	OK	41.6038	25.0811	-0.730114	-3.49984	5e-05	0.00173879	yes	down	FBgn0033019	dme:Dmel_CG10395
gene:FBgn0033027	gene:FBgn0033027	TpnC4	2R:5496673-5549543	Control	HA	OK	1209.3	761.182	-0.66786	-3.08194	5e-05	0.00173879	yes	down	FBgn0033027	dme:Dmel_CG12408
gene:FBgn0033097	gene:FBgn0033097	Zip42C.2	2R:6718195-6719533	Control	HA	OK	6.49678	3.30003	-0.977247	-2.86384	5e-05	0.00173879	yes	down	FBgn0033097	dme:Dmel_CG9430
gene:FBgn0033124	gene:FBgn0033124	Tsp42Ec	2R:7006441-7008622	Control	HA	OK	25.477	15.8563	-0.684142	-3.11808	5e-05	0.00173879	yes	down	FBgn0033124	dme:Dmel_CG12847
gene:FBgn0033139	gene:FBgn0033139	Tsp42Er	2R:7064398-7066113	Control	HA	OK	20.0735	11.5133	-0.801995	-3.12114	5e-05	0.00173879	yes	down	FBgn0033139	dme:Dmel_CG12837
gene:FBgn0033234	gene:FBgn0033234	MFS12	2R:7926652-7931016	Control	HA	OK	15.9834	10.508	-0.605078	-2.36377	5e-05	0.00173879	yes	down	FBgn0033234	dme:Dmel_CG8791
gene:FBgn0033261	gene:FBgn0033261	udd	2R:8106384-8113949	Control	HA	OK	26.5289	13.2487	-1.00171	-3.96674	5e-05	0.00173879	yes	down	FBgn0033261	dme:Dmel_CG18316
gene:FBgn0033659	gene:FBgn0033659	Damm	2R:11864111-11866383	Control	HA	OK	17.7443	7.82075	-1.18198	-4.01275	5e-05	0.00173879	yes	down	FBgn0033659	dme:Dmel_CG18188
gene:FBgn0033723	gene:FBgn0033723	CG13155	2R:12379613-12380426	Control	HA	OK	51.6913	33.4605	-0.627464	-2.65412	5e-05	0.00173879	yes	down	FBgn0033723	dme:Dmel_CG13155
gene:FBgn0033754	gene:FBgn0033754	Ak6	2R:12566184-12569847	Control	HA	OK	60.0248	34.7619	-0.78805	-3.43752	5e-05	0.00173879	yes	down	FBgn0033754	dme:Dmel_CG8816
gene:FBgn0033774	gene:FBgn0033774	CG12374	2R:12762112-12763825	Control	HA	OK	2981.79	1785.93	-0.739498	-2.81397	5e-05	0.00173879	yes	down	FBgn0033774	dme:Dmel_CG12374
gene:FBgn0033787	gene:FBgn0033787	CG13321	2R:12953111-12955712	Control	HA	OK	93.3854	67.6734	-0.464609	-2.25452	5e-05	0.00173879	yes	down	FBgn0033787	dme:Dmel_CG13321
gene:FBgn0033789	gene:FBgn0033789	CG13324	2R:13049145-13049656	Control	HA	OK	19.3961	8.52714	-1.18563	-3.31148	5e-05	0.00173879	yes	down	FBgn0033789	dme:Dmel_CG13324
gene:FBgn0033826	gene:FBgn0033826	CG4734	2R:13297201-13298467	Control	HA	OK	47.8573	32.6248	-0.552772	-2.51584	5e-05	0.00173879	yes	down	FBgn0033826	dme:Dmel_CG4734
gene:FBgn0033875	gene:FBgn0033875	CG6357	2R:13840052-13841743	Control	HA	OK	169.298	81.3909	-1.05663	-5.29393	5e-05	0.00173879	yes	down	FBgn0033875	dme:Dmel_CG6357
gene:FBgn0034008	gene:FBgn0034008	CG8152	2R:15309930-15311134	Control	HA	OK	23.8479	16.7385	-0.510692	-2.1702	5e-05	0.00173879	yes	down	FBgn0034008	dme:Dmel_CG8152
gene:FBgn0034031	gene:FBgn0034031	CG12963	2R:15555445-15562436	Control	HA	OK	45.7872	31.4748	-0.540747	-2.25956	5e-05	0.00173879	yes	down	FBgn0034031	dme:Dmel_CG12963
gene:FBgn0034052	gene:FBgn0034052	CG8299	2R:15940609-15941483	Control	HA	OK	24.3434	14.3998	-0.75748	-3.11894	5e-05	0.00173879	yes	down	FBgn0034052	dme:Dmel_CG8299
gene:FBgn0034198	gene:FBgn0034198	CG11400	2R:17134128-17135345	Control	HA	OK	68.6548	46.9035	-0.549665	-2.45343	5e-05	0.00173879	yes	down	FBgn0034198	dme:Dmel_CG11400
gene:FBgn0034199	gene:FBgn0034199	Gbp1	2R:17136450-17136903	Control	HA	OK	116.638	59.9137	-0.961077	-4.14593	5e-05	0.00173879	yes	down	FBgn0034199	dme:Dmel_CG15917
gene:FBgn0034247	gene:FBgn0034247	CG6484	2R:17582006-17584012	Control	HA	OK	21.6327	12.236	-0.822079	-3.71636	5e-05	0.00173879	yes	down	FBgn0034247	dme:Dmel_CG6484
gene:FBgn0034289	gene:FBgn0034289	CG10910	2R:18020267-18022406	Control	HA	OK	20.8721	13.4118	-0.638069	-2.96048	5e-05	0.00173879	yes	down	FBgn0034289	dme:Dmel_CG10910
gene:FBgn0034290	gene:FBgn0034290	CG5773	2R:18042295-18043744	Control	HA	OK	143.716	94.8263	-0.599867	-2.57582	5e-05	0.00173879	yes	down	FBgn0034290	dme:Dmel_CG5773
gene:FBgn0034292	gene:FBgn0034292	CG5767	2R:18046385-18047484	Control	HA	OK	89.7941	62.0665	-0.532805	-2.50087	5e-05	0.00173879	yes	down	FBgn0034292	dme:Dmel_CG5767
gene:FBgn0034318	gene:FBgn0034318	CG14500	2R:18184381-18192851	Control	HA	OK	130.62	89.3319	-0.548132	-2.61328	5e-05	0.00173879	yes	down	FBgn0034318	dme:Dmel_CG14500
gene:FBgn0034329	gene:FBgn0034329	IM1	2R:18383948-18384378	Control	HA	OK	383.577	269.547	-0.508982	-2.60197	5e-05	0.00173879	yes	down	FBgn0034329	dme:Dmel_CG18108
gene:FBgn0034407	gene:FBgn0034407	DptB	2R:18867390-18868167	Control	HA	OK	108.781	27.786	-1.969	-5.64155	5e-05	0.00173879	yes	down	FBgn0034407	dme:Dmel_CG10794
gene:FBgn0034509	gene:FBgn0034509	Obp57c	2R:20503583-20504202	Control	HA	OK	270.191	191.114	-0.499547	-2.52361	5e-05	0.00173879	yes	down	FBgn0034509	dme:Dmel_CG13421
gene:FBgn0034534	gene:FBgn0034534	maf-S	2R:20640975-20641668	Control	HA	OK	157.434	105.462	-0.578021	-2.7547	5e-05	0.00173879	yes	down	FBgn0034534	dme:Dmel_CG9954
gene:FBgn0034638	gene:FBgn0034638	CG10433	2R:21605675-21613071	Control	HA	OK	277.589	197.38	-0.491978	-2.34168	5e-05	0.00173879	yes	down	FBgn0034638	dme:Dmel_CG10433
gene:FBgn0034664	gene:FBgn0034664	CG4377	2R:21835447-21836357	Control	HA	OK	38.6903	25.3276	-0.611266	-2.60326	5e-05	0.00173879	yes	down	FBgn0034664	dme:Dmel_CG4377
gene:FBgn0035020	gene:FBgn0035020	CG13585	2R:24531593-24558961	Control	HA	OK	142.005	85.8488	-0.726068	-2.37684	5e-05	0.00173879	yes	down	FBgn0035020	dme:Dmel_CG13585
gene:FBgn0035094	gene:FBgn0035094	CG9380	2R:25183627-25255318	Control	HA	OK	26.5623	17.4803	-0.603649	-2.81801	5e-05	0.00173879	yes	down	FBgn0035094	dme:Dmel_CG9380
gene:FBgn0035186	gene:FBgn0035186	CG13912	3L:1189587-1193173	Control	HA	OK	61.402	40.4488	-0.602189	-2.61379	5e-05	0.00173879	yes	down	FBgn0035186	dme:Dmel_CG13912
gene:FBgn0035328	gene:FBgn0035328	yellow-g2	3L:2276549-2278038	Control	HA	OK	207.793	149.511	-0.474893	-2.29858	5e-05	0.00173879	yes	down	FBgn0035328	dme:Dmel_CG13804
gene:FBgn0035348	gene:FBgn0035348	CG16758	3L:2499371-2503606	Control	HA	OK	66.4095	46.8855	-0.502248	-2.4716	5e-05	0.00173879	yes	down	FBgn0035348	dme:Dmel_CG16758
gene:FBgn0035434	gene:FBgn0035434	Drsl5	3L:3316780-3317144	Control	HA	OK	224.52	146.742	-0.613561	-2.70429	5e-05	0.00173879	yes	down	FBgn0035434	dme:Dmel_CG10812
gene:FBgn0035694	gene:FBgn0035694	CG13299	3L:6231804-6232361	Control	HA	OK	479.945	254.5	-0.915203	-4.55063	5e-05	0.00173879	yes	down	FBgn0035694	dme:Dmel_CG13299
gene:FBgn0035697	gene:FBgn0035697	CG10163	3L:6257422-6258760	Control	HA	OK	31.7926	17.3865	-0.870724	-3.86371	5e-05	0.00173879	yes	down	FBgn0035697	dme:Dmel_CG10163
gene:FBgn0035868	gene:FBgn0035868	CG7194	3L:8302363-8304059	Control	HA	OK	12.4634	6.01832	-1.05026	-3.73726	5e-05	0.00173879	yes	down	FBgn0035868	dme:Dmel_CG7194
gene:FBgn0035982	gene:FBgn0035982	CG4461	3L:9375429-9376293	Control	HA	OK	431.206	303.965	-0.504474	-2.50422	5e-05	0.00173879	yes	down	FBgn0035982	dme:Dmel_CG4461
gene:FBgn0036024	gene:FBgn0036024	CG18180	3L:9631833-9679103	Control	HA	OK	256.774	102.248	-1.32842	-3.94121	5e-05	0.00173879	yes	down	FBgn0036024	dme:Dmel_CG18180
gene:FBgn0036232	gene:FBgn0036232	CG14125	3L:11974904-11975810	Control	HA	OK	341.547	239.446	-0.512383	-2.5324	5e-05	0.00173879	yes	down	FBgn0036232	dme:Dmel_CG14125
gene:FBgn0036538	gene:FBgn0036538	CG15715	3L:15835692-15837482	Control	HA	OK	196.118	123.624	-0.665765	-3.35325	5e-05	0.00173879	yes	down	FBgn0036538	dme:Dmel_CG15715
gene:FBgn0036587	gene:FBgn0036587	CG4950	3L:16265384-16268156	Control	HA	OK	6.08678	3.98798	-0.610022	-2.25897	5e-05	0.00173879	yes	down	FBgn0036587	dme:Dmel_CG4950
gene:FBgn0036656	gene:FBgn0036656	CG13026	3L:16724677-16726169	Control	HA	OK	72.3325	43.762	-0.724965	-3.4027	5e-05	0.00173879	yes	down	FBgn0036656	dme:Dmel_CG13026
gene:FBgn0036738	gene:FBgn0036738	CG7542	3L:17549825-17550980	Control	HA	OK	52.129	36.1291	-0.528924	-2.44704	5e-05	0.00173879	yes	down	FBgn0036738	dme:Dmel_CG7542
gene:FBgn0036740	gene:FBgn0036740	Vps60	3L:17620122-17621625	Control	HA	OK	115.735	82.2325	-0.493042	-2.44763	5e-05	0.00173879	yes	down	FBgn0036740	dme:Dmel_CG6259
gene:FBgn0036767	gene:FBgn0036767	CG16775	3L:17885947-17886645	Control	HA	OK	85.3608	46.7551	-0.86845	-4.06606	5e-05	0.00173879	yes	down	FBgn0036767	dme:Dmel_CG16775
gene:FBgn0036833	gene:FBgn0036833	CG3819	3L:18920429-18922108	Control	HA	OK	26.34	16.7975	-0.649005	-2.86368	5e-05	0.00173879	yes	down	FBgn0036833	dme:Dmel_CG3819
gene:FBgn0036847	gene:FBgn0036847	CNPYb	3L:19094889-19096217	Control	HA	OK	49.5925	34.4204	-0.526859	-2.58463	5e-05	0.00173879	yes	down	FBgn0036847	dme:Dmel_CG11577
gene:FBgn0037065	gene:FBgn0037065	CG12974	3L:21281751-21285962	Control	HA	OK	17.778	12.0777	-0.557752	-2.41102	5e-05	0.00173879	yes	down	FBgn0037065	dme:Dmel_CG12974
gene:FBgn0037070	gene:FBgn0037070	CG11309	3L:21301476-21304658	Control	HA	OK	67.091	47.0597	-0.511625	-2.31022	5e-05	0.00173879	yes	down	FBgn0037070	dme:Dmel_CG11309
gene:FBgn0037358	gene:FBgn0037358	elm	3R:5652639-5654861	Control	HA	OK	168.438	122.634	-0.457855	-2.26203	5e-05	0.00173879	yes	down	FBgn0037358	dme:Dmel_CG2185
gene:FBgn0037551	gene:FBgn0037551	Gie	3R:8126604-8129835	Control	HA	OK	98.8472	57.6567	-0.777711	-3.9009	5e-05	0.00173879	yes	down	FBgn0037551	dme:Dmel_CG7891
gene:FBgn0037560	gene:FBgn0037560	CR18228	3R:8250496-8261898	Control	HA	OK	30.4356	17.1595	-0.826755	-3.3007	5e-05	0.00173879	yes	down	FBgn0037560
gene:FBgn0037620	gene:FBgn0037620	ranshi	3R:8726853-8729693	Control	HA	OK	18.618	10.9887	-0.760673	-2.68957	5e-05	0.00173879	yes	down	FBgn0037620	dme:Dmel_CG9793
gene:FBgn0037714	gene:FBgn0037714	CG9396	3R:9570413-9571623	Control	HA	OK	51.3636	35.5693	-0.530114	-2.39816	5e-05	0.00173879	yes	down	FBgn0037714	dme:Dmel_CG9396
gene:FBgn0038082	gene:FBgn0038082	CG5724	3R:12739641-12741417	Control	HA	OK	2.48306	1.12792	-1.13846	-2.63882	5e-05	0.00173879	yes	down	FBgn0038082	dme:Dmel_CG5724
gene:FBgn0038147	gene:FBgn0038147	CCHa2	3R:13389058-13395197	Control	HA	OK	67.213	43.9456	-0.613022	-3.02799	5e-05	0.00173879	yes	down	FBgn0038147	dme:Dmel_CG14375
gene:FBgn0038481	gene:FBgn0038481	CG17475	3R:17129338-17130426	Control	HA	OK	79.3116	50.4453	-0.652812	-3.20628	5e-05	0.00173879	yes	down	FBgn0038481	dme:Dmel_CG17475
gene:FBgn0038484	gene:FBgn0038484	CG5246	3R:17136110-17137195	Control	HA	OK	35.9162	20.7073	-0.794495	-3.43896	5e-05	0.00173879	yes	down	FBgn0038484	dme:Dmel_CG5246
gene:FBgn0038613	gene:FBgn0038613	Vha100-4	3R:18385827-18389805	Control	HA	OK	7.27969	4.96226	-0.55288	-2.20957	5e-05	0.00173879	yes	down	FBgn0038613	dme:Dmel_CG7678
gene:FBgn0038732	gene:FBgn0038732	CG11391	3R:19778749-19780727	Control	HA	OK	3.8057	2.2301	-0.771052	-2.16544	5e-05	0.00173879	yes	down	FBgn0038732	dme:Dmel_CG11391
gene:FBgn0038756	gene:FBgn0038756	CG4783	3R:19929276-20008512	Control	HA	OK	978.776	584.483	-0.743817	-3.32319	5e-05	0.00173879	yes	down	FBgn0038756	dme:Dmel_CG4783
gene:FBgn0038914	gene:FBgn0038914	fit	3R:21877869-21884454	Control	HA	OK	563.622	228.233	-1.30422	-6.10361	5e-05	0.00173879	yes	down	FBgn0038914	dme:Dmel_CG17820
gene:FBgn0038925	gene:FBgn0038925	Cchl	3R:22025974-22027480	Control	HA	OK	248.429	181.371	-0.453889	-2.27028	5e-05	0.00173879	yes	down	FBgn0038925	dme:Dmel_CG6022
gene:FBgn0039297	gene:FBgn0039297	CG11852	3R:25237613-25238895	Control	HA	OK	17.4683	9.43396	-0.8888	-3.19297	5e-05	0.00173879	yes	down	FBgn0039297	dme:Dmel_CG11852
gene:FBgn0039298	gene:FBgn0039298	to	3R:25240179-25241668	Control	HA	OK	48.4208	29.9338	-0.693852	-3.21659	5e-05	0.00173879	yes	down	FBgn0039298	dme:Dmel_CG11853
gene:FBgn0039315	gene:FBgn0039315	CG13658	3R:25287473-25288930	Control	HA	OK	11.0038	6.50331	-0.758761	-2.67449	5e-05	0.00173879	yes	down	FBgn0039315	dme:Dmel_CG13658
gene:FBgn0039342	gene:FBgn0039342	CG5107	3R:25505190-25505931	Control	HA	OK	1136.44	512.622	-1.14855	-5.44902	5e-05	0.00173879	yes	down	FBgn0039342	dme:Dmel_CG5107
gene:FBgn0039464	gene:FBgn0039464	CG6330	3R:26949691-26958491	Control	HA	OK	41.508	30.2002	-0.458831	-2.21399	5e-05	0.00173879	yes	down	FBgn0039464	dme:Dmel_CG6330
gene:FBgn0039471	gene:FBgn0039471	CG6295	3R:26996979-27064199	Control	HA	OK	383.18	237.502	-0.690081	-2.53949	5e-05	0.00173879	yes	down	FBgn0039471	dme:Dmel_CG6295
gene:FBgn0039678	gene:FBgn0039678	Obp99a	3R:29671656-29672334	Control	HA	OK	244.186	160.039	-0.609558	-3.0056	5e-05	0.00173879	yes	down	FBgn0039678	dme:Dmel_CG18111
gene:FBgn0039760	gene:FBgn0039760	CG9682	3R:30250927-30252830	Control	HA	OK	21.8565	11.5925	-0.914864	-3.77528	5e-05	0.00173879	yes	down	FBgn0039760	dme:Dmel_CG9682
gene:FBgn0039761	gene:FBgn0039761	CG18404	3R:30253181-30254097	Control	HA	OK	197.132	95.0412	-1.05253	-5.21009	5e-05	0.00173879	yes	down	FBgn0039761	dme:Dmel_CG18404
gene:FBgn0039769	gene:FBgn0039769	CG15534	3R:30432063-30435139	Control	HA	OK	7.35526	4.24884	-0.791707	-2.92028	5e-05	0.00173879	yes	down	FBgn0039769	dme:Dmel_CG15534
gene:FBgn0039889	gene:FBgn0039889	Arl4	4:177347-179389	Control	HA	OK	136.384	73.4801	-0.892251	-4.5461	5e-05	0.00173879	yes	down	FBgn0039889	dme:Dmel_CG2219
gene:FBgn0039896	gene:FBgn0039896	yellow-h	4:227921-230428	Control	HA	OK	11.7716	6.00921	-0.970061	-3.68003	5e-05	0.00173879	yes	down	FBgn0039896	dme:Dmel_CG1629
gene:FBgn0039900	gene:FBgn0039900	Syt7	4:278684-306481	Control	HA	OK	9.75972	5.67047	-0.783371	-3.58675	5e-05	0.00173879	yes	down	FBgn0039900	dme:Dmel_CG2381
gene:FBgn0039915	gene:FBgn0039915	Gat	4:629690-635350	Control	HA	OK	8.91761	5.5847	-0.675177	-3.10244	5e-05	0.00173879	yes	down	FBgn0039915	dme:Dmel_CG1732
gene:FBgn0039927	gene:FBgn0039927	CG11155	4:1126601-1169239	Control	HA	OK	18.1602	11.9871	-0.5993	-2.53544	5e-05	0.00173879	yes	down	FBgn0039927	dme:Dmel_CG11155
gene:FBgn0039958	gene:FBgn0039958	CG12567	2L:23161121-23174484	Control	HA	OK	46.8011	34.6007	-0.435742	-2.21024	5e-05	0.00173879	yes	down	FBgn0039958	dme:Dmel_CG12567
gene:FBgn0039969	gene:FBgn0039969	Fis1	2R:5603586-5604834	Control	HA	OK	223.96	142.422	-0.653066	-3.18004	5e-05	0.00173879	yes	down	FBgn0039969	dme:Dmel_CG17510
gene:FBgn0039970	gene:FBgn0039970	CG17508	2R:5608634-5611586	Control	HA	OK	267.286	163.514	-0.708972	-3.41289	5e-05	0.00173879	yes	down	FBgn0039970	dme:Dmel_CG17508
gene:FBgn0039977	gene:FBgn0039977	CG17454	3L:23715022-23716689	Control	HA	OK	211.09	125.066	-0.755174	-3.98524	5e-05	0.00173879	yes	down	FBgn0039977	dme:Dmel_CG17454
gene:FBgn0039994	gene:FBgn0039994	conu	2R:4744347-4758048	Control	HA	OK	71.7993	52.3359	-0.45617	-2.33233	5e-05	0.00173879	yes	down	FBgn0039994	dme:Dmel_CG17082
gene:FBgn0040005	gene:FBgn0040005	CG17883	2R:4671852-4673639	Control	HA	OK	62.0794	35.9191	-0.789365	-4.10433	5e-05	0.00173879	yes	down	FBgn0040005	dme:Dmel_CG17883
gene:FBgn0040010	gene:FBgn0040010	CG17493	2L:22550063-22556295	Control	HA	OK	55.6376	40.8577	-0.445451	-2.2452	5e-05	0.00173879	yes	down	FBgn0040010	dme:Dmel_CG17493
gene:FBgn0040074	gene:FBgn0040074	retinin	3L:16331932-16332789	Control	HA	OK	492.615	336.767	-0.548709	-2.91967	5e-05	0.00173879	yes	down	FBgn0040074	dme:Dmel_CG13057
gene:FBgn0040099	gene:FBgn0040099	lectin-28C	2L:7857076-7860839	Control	HA	OK	31.4361	18.7251	-0.747452	-3.08213	5e-05	0.00173879	yes	down	FBgn0040099	dme:Dmel_CG7106
gene:FBgn0040532	gene:FBgn0040532	CG8369	3R:8822007-8822838	Control	HA	OK	188.577	126.344	-0.577794	-2.81986	5e-05	0.00173879	yes	down	FBgn0040532	dme:Dmel_CG8369
gene:FBgn0040582	gene:FBgn0040582	CG5791	3R:22087074-22088501	Control	HA	OK	141.084	79.5832	-0.826018	-3.40064	5e-05	0.00173879	yes	down	FBgn0040582	dme:Dmel_CG5791
gene:FBgn0040606	gene:FBgn0040606	CG6503	3R:26424697-26425105	Control	HA	OK	1406.41	948.261	-0.568666	-2.81035	5e-05	0.00173879	yes	down	FBgn0040606	dme:Dmel_CG6503
gene:FBgn0040636	gene:FBgn0040636	CG13255	3L:20837487-20838839	Control	HA	OK	45.8482	25.9771	-0.819622	-2.95037	5e-05	0.00173879	yes	down	FBgn0040636	dme:Dmel_CG13255
gene:FBgn0040813	gene:FBgn0040813	Nplp2	3L:13356375-13357223	Control	HA	OK	8044.73	5412.33	-0.571795	-2.38327	5e-05	0.00173879	yes	down	FBgn0040813	dme:Dmel_CG11051
gene:FBgn0040928	gene:FBgn0040928	CR15345	X:8397156-8398298	Control	HA	OK	31.1882	15.9583	-0.966689	-4.38734	5e-05	0.00173879	yes	down	FBgn0040928
gene:FBgn0040959	gene:FBgn0040959	Peritrophin-15a	2L:8395664-8396096	Control	HA	OK	286.766	177.155	-0.694862	-3.31413	5e-05	0.00173879	yes	down	FBgn0040959	dme:Dmel_CG17814
gene:FBgn0040972	gene:FBgn0040972	CG16978	2L:13143213-13143622	Control	HA	OK	175.78	96.2788	-0.868484	-3.78857	5e-05	0.00173879	yes	down	FBgn0040972	dme:Dmel_CG16978
gene:FBgn0040992	gene:FBgn0040992	CG10570	2L:18808693-18811252	Control	HA	OK	934.085	494.458	-0.917707	-4.36007	5e-05	0.00173879	yes	down	FBgn0040992	dme:Dmel_CG10570
gene:FBgn0041252	gene:FBgn0041252	Femcoat	X:4241886-4242826	Control	HA	OK	126.827	48.63	-1.38295	-5.79703	5e-05	0.00173879	yes	down	FBgn0041252	dme:Dmel_CG15573
gene:FBgn0041579	gene:FBgn0041579	AttC	2R:13393704-13399368	Control	HA	OK	16.5551	1.82486	-3.18142	-6.60438	5e-05	0.00173879	yes	down	FBgn0041579	dme:Dmel_CG4740
gene:FBgn0041581	gene:FBgn0041581	AttB	2R:14749222-14750165	Control	HA	OK	10.0254	2.65267	-1.91814	-4.60954	5e-05	0.00173879	yes	down	FBgn0041581	dme:Dmel_CG18372
gene:FBgn0041709	gene:FBgn0041709	yellow-g	3L:2268824-2272769	Control	HA	OK	261.151	142.69	-0.871998	-4.32264	5e-05	0.00173879	yes	down	FBgn0041709	dme:Dmel_CG5717
gene:FBgn0042119	gene:FBgn0042119	Cpr65Au	3L:6131241-6132109	Control	HA	OK	359.023	240.175	-0.579994	-2.88571	5e-05	0.00173879	yes	down	FBgn0042119	dme:Dmel_CG18778
gene:FBgn0043534	gene:FBgn0043534	Obp57b	2R:20504250-20505136	Control	HA	OK	53.3139	29.5287	-0.852395	-3.38001	5e-05	0.00173879	yes	down	FBgn0043534	dme:Dmel_CG30142
gene:FBgn0043535	gene:FBgn0043535	Obp57a	2R:20505149-20505758	Control	HA	OK	274.253	192.703	-0.509131	-2.60601	5e-05	0.00173879	yes	down	FBgn0043535	dme:Dmel_CG30141
gene:FBgn0043578	gene:FBgn0043578	PGRP-SB1	3L:16727298-16727989	Control	HA	OK	32.7963	13.9184	-1.23654	-4.00969	5e-05	0.00173879	yes	down	FBgn0043578	dme:Dmel_CG9681
gene:FBgn0043783	gene:FBgn0043783	CG32444	3L:21636642-21639060	Control	HA	OK	43.8971	29.4744	-0.574663	-2.67346	5e-05	0.00173879	yes	down	FBgn0043783	dme:Dmel_CG32444
gene:FBgn0044510	gene:FBgn0044510	mRpS5	3L:24537235-24543534	Control	HA	OK	242.073	155.385	-0.639592	-2.92018	5e-05	0.00173879	yes	down	FBgn0044510	dme:Dmel_CG40049
gene:FBgn0044810	gene:FBgn0044810	TotX	3R:20901955-20908263	Control	HA	OK	56.3322	34.1419	-0.722419	-2.38369	5e-05	0.00173879	yes	down	FBgn0044810	dme:Dmel_CG31193
gene:FBgn0044812	gene:FBgn0044812	TotC	3R:20872987-20873580	Control	HA	OK	216.155	79.9954	-1.43408	-6.89729	5e-05	0.00173879	yes	down	FBgn0044812	dme:Dmel_CG31508
gene:FBgn0046692	gene:FBgn0046692	Stlk	2R:4546690-4565281	Control	HA	OK	69.2542	42.6477	-0.699434	-3.56693	5e-05	0.00173879	yes	down	FBgn0046692	dme:Dmel_CG40293
gene:FBgn0046706	gene:FBgn0046706	Haspin	2R:4014110-4049342	Control	HA	OK	85.9062	48.7476	-0.81743	-4.33495	5e-05	0.00173879	yes	down	FBgn0046706	dme:Dmel_CG40080
gene:FBgn0050022	gene:FBgn0050022	CG30022	2R:11384742-11397432	Control	HA	OK	35.022	20.6437	-0.76256	-3.20276	5e-05	0.00173879	yes	down	FBgn0050022	dme:Dmel_CG30022
gene:FBgn0050042	gene:FBgn0050042	Cpr49Ab	2R:12378439-12379396	Control	HA	OK	234.693	168.491	-0.478103	-2.43307	5e-05	0.00173879	yes	down	FBgn0050042	dme:Dmel_CG30042
gene:FBgn0050197	gene:FBgn0050197	CG30197	2R:14512558-14515211	Control	HA	OK	169.601	94.517	-0.843498	-3.97708	5e-05	0.00173879	yes	down	FBgn0050197	dme:Dmel_CG30197
gene:FBgn0050285	gene:FBgn0050285	CG30285	2R:21687902-21688545	Control	HA	OK	56.1783	39.1553	-0.520806	-2.3253	5e-05	0.00173879	yes	down	FBgn0050285	dme:Dmel_CG30285
gene:FBgn0050360	gene:FBgn0050360	Mal-A6	2R:8465157-8467595	Control	HA	OK	59.3836	32.234	-0.881482	-4.21939	5e-05	0.00173879	yes	down	FBgn0050360	dme:Dmel_CG30360
gene:FBgn0051205	gene:FBgn0051205	CG31205	3R:20731630-20732707	Control	HA	OK	120.928	75.2131	-0.685089	-3.37487	5e-05	0.00173879	yes	down	FBgn0051205	dme:Dmel_CG31205
gene:FBgn0051207	gene:FBgn0051207	CG31207	3R:21046031-21047027	Control	HA	OK	39.898	25.429	-0.649842	-2.87023	5e-05	0.00173879	yes	down	FBgn0051207	dme:Dmel_CG31207
gene:FBgn0051300	gene:FBgn0051300	CG31300	3R:25283619-25285224	Control	HA	OK	41.1285	21.5528	-0.932263	-4.45993	5e-05	0.00173879	yes	down	FBgn0051300	dme:Dmel_CG31300
gene:FBgn0051446	gene:FBgn0051446	CG31446	3R:15693085-15694194	Control	HA	OK	16.8715	9.289	-0.860995	-3.30742	5e-05	0.00173879	yes	down	FBgn0051446	dme:Dmel_CG31446
gene:FBgn0051676	gene:FBgn0051676	CG31676	2L:20840749-20849182	Control	HA	OK	41.8583	28.1785	-0.570918	-2.66461	5e-05	0.00173879	yes	down	FBgn0051676	dme:Dmel_CG31676
gene:FBgn0051681	gene:FBgn0051681	CG31681	2L:2285162-2286873	Control	HA	OK	68.5053	34.0999	-1.00645	-4.68941	5e-05	0.00173879	yes	down	FBgn0051681	dme:Dmel_CG31681
gene:FBgn0051809	gene:FBgn0051809	CG31809	2L:16853619-16858714	Control	HA	OK	14.5768	9.14627	-0.67242	-2.54077	5e-05	0.00173879	yes	down	FBgn0051809	dme:Dmel_CG31809
gene:FBgn0051810	gene:FBgn0051810	CG31810	2L:16849017-16852368	Control	HA	OK	19.8504	13.0007	-0.610576	-2.50823	5e-05	0.00173879	yes	down	FBgn0051810	dme:Dmel_CG31810
gene:FBgn0051926	gene:FBgn0051926	CG31926	2L:1495459-1497071	Control	HA	OK	11.3067	4.83677	-1.22507	-3.95084	5e-05	0.00173879	yes	down	FBgn0051926	dme:Dmel_CG31926
gene:FBgn0051997	gene:FBgn0051997	CG31997	4:154653-156060	Control	HA	OK	87.0635	46.34	-0.90981	-4.3558	5e-05	0.00173879	yes	down	FBgn0051997	dme:Dmel_CG31997
gene:FBgn0052006	gene:FBgn0052006	CG32006	4:150763-153538	Control	HA	OK	3.02665	1.24536	-1.28116	-2.97892	5e-05	0.00173879	yes	down	FBgn0052006	dme:Dmel_CG32006
gene:FBgn0052115	gene:FBgn0052115	CG32115	3L:12912026-12913646	Control	HA	OK	7.93854	3.96211	-1.0026	-3.373	5e-05	0.00173879	yes	down	FBgn0052115	dme:Dmel_CG32115
gene:FBgn0052243	gene:FBgn0052243	CG32243	3L:4539301-4541244	Control	HA	OK	42.6003	25.8957	-0.718154	-3.50142	5e-05	0.00173879	yes	down	FBgn0052243	dme:Dmel_CG32243
gene:FBgn0052283	gene:FBgn0052283	Drsl3	3L:3314995-3315355	Control	HA	OK	10.8094	4.16161	-1.37708	-2.54299	5e-05	0.00173879	yes	down	FBgn0052283	dme:Dmel_CG32283
gene:FBgn0052284	gene:FBgn0052284	CG32284	3L:3186663-3187245	Control	HA	OK	16.146	6.72538	-1.26349	-3.18227	5e-05	0.00173879	yes	down	FBgn0052284	dme:Dmel_CG32284
gene:FBgn0052350	gene:FBgn0052350	Vps11	3L:23147655-23150668	Control	HA	OK	63.7785	42.2936	-0.592632	-3.12814	5e-05	0.00173879	yes	down	FBgn0052350	dme:Dmel_CG32350
gene:FBgn0052625	gene:FBgn0052625	CG32625	X:13756163-13756826	Control	HA	OK	162.055	115.961	-0.482853	-2.35821	5e-05	0.00173879	yes	down	FBgn0052625	dme:Dmel_CG32625
gene:FBgn0052644	gene:FBgn0052644	Mur11Da	X:12967887-12970056	Control	HA	OK	2.61371	0.992644	-1.39675	-3.18464	5e-05	0.00173879	yes	down	FBgn0052644	dme:Dmel_CG32644
gene:FBgn0052736	gene:FBgn0052736	CG32736	X:7011356-7012137	Control	HA	OK	115.483	77.214	-0.58075	-2.67697	5e-05	0.00173879	yes	down	FBgn0052736	dme:Dmel_CG32736
gene:FBgn0052774	gene:FBgn0052774	Muc4B	X:4244094-4246139	Control	HA	OK	22.6655	11.8763	-0.932418	-4.51261	5e-05	0.00173879	yes	down	FBgn0052774	dme:Dmel_CG32774
gene:FBgn0053109	gene:FBgn0053109	CG33109	3R:14220559-14221584	Control	HA	OK	123.466	74.2165	-0.734301	-3.69072	5e-05	0.00173879	yes	down	FBgn0053109	dme:Dmel_CG33109
gene:FBgn0053217	gene:FBgn0053217	CG33217	3L:23126024-23132209	Control	HA	OK	36.0728	24.8647	-0.536816	-2.77283	5e-05	0.00173879	yes	down	FBgn0053217	dme:Dmel_CG33217
gene:FBgn0053258	gene:FBgn0053258	CG33258	3L:16082550-16083638	Control	HA	OK	104.002	58.4406	-0.831564	-4.13907	5e-05	0.00173879	yes	down	FBgn0053258	dme:Dmel_CG33258
gene:FBgn0053296	gene:FBgn0053296	CG33296	2L:7713997-7716645	Control	HA	OK	1.81734	0.716997	-1.34179	-3.27506	5e-05	0.00173879	yes	down	FBgn0053296	dme:Dmel_CG33296
gene:FBgn0053470	gene:FBgn0053470	CG33470	2R:13411738-13414620	Control	HA	OK	79.3125	52.2618	-0.601793	-2.43177	5e-05	0.00173879	yes	down	FBgn0053470	dme:Dmel_CG18279
gene:FBgn0053494	gene:FBgn0053494	CG33494	3R:25493480-25495161	Control	HA	OK	31.1074	18.2467	-0.76962	-3.38022	5e-05	0.00173879	yes	down	FBgn0053494	dme:Dmel_CG33494
gene:FBgn0053965	gene:FBgn0053965	CG33965	3L:1232881-1234015	Control	HA	OK	19.5415	12.4299	-0.65273	-2.40452	5e-05	0.00173879	yes	down	FBgn0053965	dme:Dmel_CG33965
gene:FBgn0054026	gene:FBgn0054026	CG34026	X:9502825-9550838	Control	HA	OK	153.673	94.7832	-0.69716	-2.77119	5e-05	0.00173879	yes	down	FBgn0054026	dme:Dmel_CG34026
gene:FBgn0058045	gene:FBgn0058045	CG40045	3L:24028514-24035859	Control	HA	OK	427.533	285.777	-0.581148	-2.90256	5e-05	0.00173879	yes	down	FBgn0058045	dme:Dmel_CG40045
gene:FBgn0058178	gene:FBgn0058178	CG40178	3L:25798440-26014112	Control	HA	OK	38.8647	26.0802	-0.575509	-2.88662	5e-05	0.00173879	yes	down	FBgn0058178	dme:Dmel_CG40178
gene:FBgn0058191	gene:FBgn0058191	CG40191	2R:1264139-1267747	Control	HA	OK	105.811	69.6031	-0.604262	-2.99607	5e-05	0.00173879	yes	down	FBgn0058191	dme:Dmel_CG40191
gene:FBgn0058263	gene:FBgn0058263	MFS17	2R:2494741-2565385	Control	HA	OK	58.9543	40.4674	-0.542836	-2.3079	5e-05	0.00173879	yes	down	FBgn0058263	dme:Dmel_CG40263
gene:FBgn0062928	gene:FBgn0062928	hpRNA:CR33940	3L:19486744-19488439	Control	HA	OK	121.313	85.87	-0.49851	-2.38436	5e-05	0.00173879	yes	down	FBgn0062928	dme:Dmel_CR33940
gene:FBgn0065032	gene:FBgn0065032	Arpc3B	X:17104570-17105852	Control	HA	OK	24.5698	14.8912	-0.722429	-2.44752	5e-05	0.00173879	yes	down	FBgn0065032	dme:Dmel_CG8936
gene:FBgn0085188	gene:FBgn0085188	CG34159	2L:10202519-10204317	Control	HA	OK	120.625	82.1392	-0.554388	-2.79225	5e-05	0.00173879	yes	down	FBgn0085188	dme:Dmel_CG34159
gene:FBgn0085223	gene:FBgn0085223	CG34194	2R:17539321-17545045	Control	HA	OK	17.1715	6.86839	-1.32198	-2.56503	5e-05	0.00173879	yes	down	FBgn0085223	dme:Dmel_CG34194
gene:FBgn0085241	gene:FBgn0085241	CG34212	2R:6049873-6050286	Control	HA	OK	2653.46	1764.38	-0.588711	-2.95005	5e-05	0.00173879	yes	down	FBgn0085241	dme:Dmel_CG34212
gene:FBgn0085358	gene:FBgn0085358	Diedel3	X:19050441-19053160	Control	HA	OK	193.064	113.137	-0.771003	-3.8638	5e-05	0.00173879	yes	down	FBgn0085358	dme:Dmel_CG34329
gene:FBgn0085810	gene:FBgn0085810	CR41597	3L:24553109-24554200	Control	HA	OK	117.808	73.2527	-0.685488	-3.6249	5e-05	0.00173879	yes	down	FBgn0085810
gene:FBgn0086378	gene:FBgn0086378	Alg-2	3R:3623142-3627690	Control	HA	OK	70.5488	48.1304	-0.551671	-2.83516	5e-05	0.00173879	yes	down	FBgn0086378	dme:Dmel_CG40410
gene:FBgn0086450	gene:FBgn0086450	su(r)	X:9196807-9201820	Control	HA	OK	17.2304	12.2835	-0.488238	-2.32304	5e-05	0.00173879	yes	down	FBgn0086450	dme:Dmel_CG2194
gene:FBgn0086683	gene:FBgn0086683	Spf45	2L:23066873-23068386	Control	HA	OK	67.5478	47.9458	-0.494506	-2.48522	5e-05	0.00173879	yes	down	FBgn0086683	dme:Dmel_CG17540
gene:FBgn0250757	gene:FBgn0250757	CG42235	3R:25907021-25922634	Control	HA	OK	48.4843	36.0583	-0.427186	-2.14234	5e-05	0.00173879	yes	down	FBgn0250757	dme:Dmel_CG42235
gene:FBgn0250836	gene:FBgn0250836	CG8628	3L:7130873-7131505	Control	HA	OK	242.485	168.916	-0.52159	-2.36919	5e-05	0.00173879	yes	down	FBgn0250836	dme:Dmel_CG8628
gene:FBgn0259216	gene:FBgn0259216	RhoGAP102A	4:254996-265574	Control	HA	OK	4.46088	2.51896	-0.824497	-3.39356	5e-05	0.00173879	yes	down	FBgn0259216	dme:Dmel_CG42316
gene:FBgn0259708	gene:FBgn0259708	CG42362	2R:21664125-21666579	Control	HA	OK	9.62569	5.69998	-0.755934	-2.68042	5e-05	0.00173879	yes	down	FBgn0259708	dme:Dmel_CG42362
gene:FBgn0259748	gene:FBgn0259748	CG42397	3L:11973084-11973790	Control	HA	OK	166.232	86.5691	-0.941273	-4.7181	5e-05	0.00173879	yes	down	FBgn0259748	dme:Dmel_CG42397
gene:FBgn0261437	gene:FBgn0261437	CSN8	2L:8364854-8365663	Control	HA	OK	143.415	96.9189	-0.565345	-2.79126	5e-05	0.00173879	yes	down	FBgn0261437	dme:Dmel_CG42522
gene:FBgn0261504	gene:FBgn0261504	7SLRNA:CR42652	3R:6820132-6820431	Control	HA	OK	114.877	63.6719	-0.851355	-3.14784	5e-05	0.00173879	yes	down	FBgn0261504	dme:Dmel_CR42652
gene:FBgn0261505	gene:FBgn0261505	CR42653	2R:1207415-1209312	Control	HA	OK	22.0505	14.0135	-0.653992	-2.70447	5e-05	0.00173879	yes	down	FBgn0261505
gene:FBgn0261575	gene:FBgn0261575	tobi	3R:25340251-25346921	Control	HA	OK	27.5971	11.886	-1.21525	-5.2741	5e-05	0.00173879	yes	down	FBgn0261575	dme:Dmel_CG11909
gene:FBgn0261615	gene:FBgn0261615	CG42704	X:7412667-7413296	Control	HA	OK	576.592	392.65	-0.554306	-2.73296	5e-05	0.00173879	yes	down	FBgn0261615	dme:Dmel_CG42704
gene:FBgn0261639	gene:FBgn0261639	CR42722	3L:24546137-24546986	Control	HA	OK	151.992	97.8724	-0.635022	-3.25611	5e-05	0.00173879	yes	down	FBgn0261639
gene:FBgn0261640	gene:FBgn0261640	CR42723	3L:24549635-24550445	Control	HA	OK	146.745	91.4984	-0.68149	-3.48374	5e-05	0.00173879	yes	down	FBgn0261640
gene:FBgn0261989	gene:FBgn0261989	CG42807	2R:13570594-13572759	Control	HA	OK	191.255	112.021	-0.771727	-3.88399	5e-05	0.00173879	yes	down	FBgn0261989	dme:Dmel_CG42807
gene:FBgn0262104	gene:FBgn0262104	CG42857	3R:9820513-9821191	Control	HA	OK	25.8591	16.2082	-0.673952	-2.3116	5e-05	0.00173879	yes	down	FBgn0262104	dme:Dmel_CG42857
gene:FBgn0262123	gene:FBgn0262123	l(2)41Ab	2R:1349391-1443935	Control	HA	OK	2.26303	1.04422	-1.11583	-2.89849	5e-05	0.00173879	yes	down	FBgn0262123	dme:Dmel_CG41265
gene:FBgn0262124	gene:FBgn0262124	uex	2R:3900284-3949757	Control	HA	OK	74.8776	41.2285	-0.860893	-4.33055	5e-05	0.00173879	yes	down	FBgn0262124	dme:Dmel_CG42595
gene:FBgn0262512	gene:FBgn0262512	Vha14-1	2R:15679425-15680084	Control	HA	OK	502.669	322.61	-0.639817	-3.16046	5e-05	0.00173879	yes	down	FBgn0262512	dme:Dmel_CG8210
gene:FBgn0262536	gene:FBgn0262536	CG43090	X:6199215-6199891	Control	HA	OK	917.283	513.689	-0.836471	-4.16747	5e-05	0.00173879	yes	down	FBgn0262536	dme:Dmel_CG43090
gene:FBgn0262580	gene:FBgn0262580	CG43120	3L:14381912-14383299	Control	HA	OK	2.84921	0.812695	-1.80978	-3.7158	5e-05	0.00173879	yes	down	FBgn0262580	dme:Dmel_CG43120
gene:FBgn0262631	gene:FBgn0262631	CR43148	2L:21624678-21626190	Control	HA	OK	5.55025	2.40362	-1.20735	-3.19495	5e-05	0.00173879	yes	down	FBgn0262631	dme:Dmel_CR43148
gene:FBgn0262794	gene:FBgn0262794	CG43175	3R:17630716-17645262	Control	HA	OK	8.8836	3.64884	-1.28371	-2.51158	5e-05	0.00173879	yes	down	FBgn0262794	dme:Dmel_CG43175
gene:FBgn0262843	gene:FBgn0262843	CG43207	2R:23152747-23153318	Control	HA	OK	18.2141	7.87673	-1.20939	-2.84467	5e-05	0.00173879	yes	down	FBgn0262843	dme:Dmel_CG43207
gene:FBgn0263234	gene:FBgn0263234	Phae1	2L:12109416-12110664	Control	HA	OK	58.3076	40.0581	-0.541589	-2.44124	5e-05	0.00173879	yes	down	FBgn0263234	dme:Dmel_CG16996
gene:FBgn0263235	gene:FBgn0263235	Phae2	2L:12111109-12112256	Control	HA	OK	42.4229	23.5196	-0.850979	-3.57174	5e-05	0.00173879	yes	down	FBgn0263235	dme:Dmel_CG16997
gene:FBgn0263748	gene:FBgn0263748	CG43673	X:15779145-15780214	Control	HA	OK	105.582	68.4042	-0.62621	-3.13022	5e-05	0.00173879	yes	down	FBgn0263748	dme:Dmel_CG43673
gene:FBgn0264296	gene:FBgn0264296	CG43774	2L:4008652-4009090	Control	HA	OK	229.386	116.332	-0.979521	-4.72014	5e-05	0.00173879	yes	down	FBgn0264296	dme:Dmel_CG43774
gene:FBgn0264490	gene:FBgn0264490	Eip93F	3R:21949113-22014539	Control	HA	OK	5.23326	3.70105	-0.499775	-2.41539	5e-05	0.00173879	yes	down	FBgn0264490	dme:Dmel_CG18389
gene:FBgn0264492	gene:FBgn0264492	CkIIalpha	3L:23097071-23103460	Control	HA	OK	344.535	195.145	-0.8201	-4.01485	5e-05	0.00173879	yes	down	FBgn0264492	dme:Dmel_CG17520
gene:FBgn0264776	gene:FBgn0264776	CG44014	3R:15507939-15508886	Control	HA	OK	52.1107	36.1203	-0.52877	-2.45576	5e-05	0.00173879	yes	down	FBgn0264776	dme:Dmel_CG44014
gene:FBgn0264922	gene:FBgn0264922	smt3	2L:6966779-6967644	Control	HA	OK	1209.66	819.923	-0.561045	-2.69929	5e-05	0.00173879	yes	down	FBgn0264922	dme:Dmel_CG4494
gene:FBgn0264989	gene:FBgn0264989	CG44140	2L:15644182-15718272	Control	HA	OK	36.0806	19.8026	-0.865532	-2.28472	5e-05	0.00173879	yes	down	FBgn0264989	dme:Dmel_CG44140
gene:FBgn0264991	gene:FBgn0264991	CG44142	3R:13312854-13313188	Control	HA	OK	45.2464	21.2482	-1.09046	-3.25324	5e-05	0.00173879	yes	down	FBgn0264991	dme:Dmel_CG44142
gene:FBgn0265185	gene:FBgn0265185	CG44250	2R:12948347-12952293	Control	HA	OK	91.5254	59.2513	-0.627326	-2.89182	5e-05	0.00173879	yes	down	FBgn0265185	dme:Dmel_CG44250
gene:FBgn0265533	gene:FBgn0265533	CR44383	X:15796476-15796897	Control	HA	OK	41.5335	24.0874	-0.785998	-2.50583	5e-05	0.00173879	yes	down	FBgn0265533
gene:FBgn0266417	gene:FBgn0266417	ringer	3L:16354745-16359428	Control	HA	OK	36.1377	23.84	-0.600119	-2.58088	5e-05	0.00173879	yes	down	FBgn0266417	dme:Dmel_CG45057
gene:FBgn0266455	gene:FBgn0266455	CG45080	3R:13318990-13319270	Control	HA	OK	2558.14	1344.15	-0.928404	-4.57408	5e-05	0.00173879	yes	down	FBgn0266455	dme:Dmel_CG45080
gene:FBgn0266724	gene:FBgn0266724	Trs20	3L:16131000-16131632	Control	HA	OK	48.6231	33.7275	-0.527716	-2.28048	5e-05	0.00173879	yes	down	FBgn0266724	dme:Dmel_CG5161
gene:FBgn0267365	gene:FBgn0267365	l(2)SH0834	2L:10311049-10312099	Control	HA	OK	48.1184	34.4858	-0.480586	-2.32677	5e-05	0.00173879	yes	down	FBgn0267365	dme:Dmel_CG5385
gene:FBgn0267398	gene:FBgn0267398	Yeti	2R:1343402-1345119	Control	HA	OK	367.846	222.809	-0.723295	-3.61704	5e-05	0.00173879	yes	down	FBgn0267398	dme:Dmel_CG40218
gene:FBgn0267429	gene:FBgn0267429	CG45782	3L:25236939-25670980	Control	HA	OK	5.97665	3.52035	-0.763617	-2.77181	5e-05	0.00173879	yes	down	FBgn0267429	dme:Dmel_CG45782
gene:FBgn0267861	gene:FBgn0267861	Maf1	2R:1512809-1527095	Control	HA	OK	132.828	71.5292	-0.89295	-4.57723	5e-05	0.00173879	yes	down	FBgn0267861	dme:Dmel_CG40196
gene:FBgn0283462	gene:FBgn0283462	IMPPP	2R:13407010-13409887	Control	HA	OK	79.8304	52.7953	-0.596528	-2.39904	5e-05	0.00173879	yes	down	FBgn0283462	dme:Dmel_CG18279
gene:FBgn0283666	gene:FBgn0283666	Rap2l	2R:24063050-24065405	Control	HA	OK	104.785	59.1055	-0.82607	-3.75473	5e-05	0.00173879	yes	down	FBgn0283666	dme:Dmel_CG3204
gene:FBgn0003137	gene:FBgn0003137	Ppn	3R:28520664-28540324	Control	HA	OK	13.3751	9.69	-0.464986	-2.27536	0.0001	0.00315339	yes	down	FBgn0003137	dme:Dmel_CG33103
gene:FBgn0004132	gene:FBgn0004132	boca	2R:7565872-7566738	Control	HA	OK	131.493	93.2058	-0.496494	-2.40523	0.0001	0.00315339	yes	down	FBgn0004132	dme:Dmel_CG30498
gene:FBgn0013770	gene:FBgn0013770	Cp1	2R:13960674-13967981	Control	HA	OK	1073	742.87	-0.530463	-2.31466	0.0001	0.00315339	yes	down	FBgn0013770	dme:Dmel_CG6692
gene:FBgn0014000	gene:FBgn0014000	Hf	2L:19966726-19967685	Control	HA	OK	80.6455	58.0752	-0.473672	-2.30447	0.0001	0.00315339	yes	down	FBgn0014000	dme:Dmel_CG10658
gene:FBgn0029837	gene:FBgn0029837	Tsp5D	X:6067957-6074857	Control	HA	OK	7.91728	5.01312	-0.659298	-2.51289	0.0001	0.00315339	yes	down	FBgn0029837	dme:Dmel_CG4690
gene:FBgn0030688	gene:FBgn0030688	CG8952	X:15762955-15769514	Control	HA	OK	107.836	73.7914	-0.547311	-2.34868	0.0001	0.00315339	yes	down	FBgn0030688	dme:Dmel_CG8952
gene:FBgn0032082	gene:FBgn0032082	CG18088	2L:8967534-8975428	Control	HA	OK	3.41798	1.33818	-1.35287	-2.64347	0.0001	0.00315339	yes	down	FBgn0032082	dme:Dmel_CG18088
gene:FBgn0032523	gene:FBgn0032523	CG16956	2L:13413782-13414575	Control	HA	OK	5.92855	2.65334	-1.15987	-2.43492	0.0001	0.00315339	yes	down	FBgn0032523	dme:Dmel_CG16956
gene:FBgn0034200	gene:FBgn0034200	Gbp2	2R:17137239-17139931	Control	HA	OK	67.6131	47.838	-0.499146	-2.32453	0.0001	0.00315339	yes	down	FBgn0034200	dme:Dmel_CG11395
gene:FBgn0034443	gene:FBgn0034443	cer	2R:19396214-19396849	Control	HA	OK	164.283	118.859	-0.466927	-2.2621	0.0001	0.00315339	yes	down	FBgn0034443	dme:Dmel_CG10460
gene:FBgn0034512	gene:FBgn0034512	CG18067	2R:20534244-20535835	Control	HA	OK	367.531	260.937	-0.494162	-2.41573	0.0001	0.00315339	yes	down	FBgn0034512	dme:Dmel_CG18067
gene:FBgn0034715	gene:FBgn0034715	Oatp58Db	2R:22221179-22223499	Control	HA	OK	10.187	7.09335	-0.522196	-2.24526	0.0001	0.00315339	yes	down	FBgn0034715	dme:Dmel_CG3382
gene:FBgn0037146	gene:FBgn0037146	CG7470	3L:21972001-21984606	Control	HA	OK	137.286	99.3418	-0.46671	-2.26769	0.0001	0.00315339	yes	down	FBgn0037146	dme:Dmel_CG7470
gene:FBgn0037387	gene:FBgn0037387	CG1213	3R:5841169-5846568	Control	HA	OK	66.06	47.5111	-0.475512	-2.50604	0.0001	0.00315339	yes	down	FBgn0037387	dme:Dmel_CG1213
gene:FBgn0037936	gene:FBgn0037936	CG6908	3R:11688380-11690051	Control	HA	OK	31.349	22.4782	-0.479893	-2.22641	0.0001	0.00315339	yes	down	FBgn0037936	dme:Dmel_CG6908
gene:FBgn0039890	gene:FBgn0039890	CG2316	4:184075-193829	Control	HA	OK	49.0309	35.5322	-0.464566	-2.35409	0.0001	0.00315339	yes	down	FBgn0039890	dme:Dmel_CG2316
gene:FBgn0039955	gene:FBgn0039955	CG41099	3R:3846728-3868401	Control	HA	OK	42.6479	31.0582	-0.457501	-2.28763	0.0001	0.00315339	yes	down	FBgn0039955	dme:Dmel_CG41099
gene:FBgn0052279	gene:FBgn0052279	Drsl2	3L:3314348-3314681	Control	HA	OK	10.7578	2.60228	-2.04754	-2.83012	0.0001	0.00315339	yes	down	FBgn0052279	dme:Dmel_CG32279
gene:FBgn0061492	gene:FBgn0061492	loj	3L:6094986-6096517	Control	HA	OK	68.6114	49.7767	-0.462978	-2.15063	0.0001	0.00315339	yes	down	FBgn0061492	dme:Dmel_CG10733
gene:FBgn0084017	gene:FBgn0084017	CR41454	3L:23136622-23138271	Control	HA	OK	41.3666	28.7646	-0.524173	-2.48373	0.0001	0.00315339	yes	down	FBgn0084017
gene:FBgn0085317	gene:FBgn0085317	CG34288	3R:22446762-22447263	Control	HA	OK	28.0792	15.8183	-0.827906	-2.45483	0.0001	0.00315339	yes	down	FBgn0085317	dme:Dmel_CG34288
gene:FBgn0261616	gene:FBgn0261616	CG42705	X:7413868-7414662	Control	HA	OK	134.897	90.881	-0.569804	-2.51524	0.0001	0.00315339	yes	down	FBgn0261616	dme:Dmel_CG42705
gene:FBgn0262954	gene:FBgn0262954	Rpb12	2R:15144967-15145519	Control	HA	OK	214.872	144.302	-0.574384	-2.56799	0.0001	0.00315339	yes	down	FBgn0262954	dme:Dmel_CG34186
gene:FBgn0011693	gene:FBgn0011693	Pdh	3L:16351990-16354297	Control	HA	OK	323.579	234.981	-0.461576	-2.19322	0.00015	0.00444151	yes	down	FBgn0011693	dme:Dmel_CG4899
gene:FBgn0013303	gene:FBgn0013303	Nca	3L:19991886-19997568	Control	HA	OK	96.1107	65.9176	-0.544032	-2.32751	0.00015	0.00444151	yes	down	FBgn0013303	dme:Dmel_CG7641
gene:FBgn0015570	gene:FBgn0015570	alpha-Est2	3R:7541809-7545250	Control	HA	OK	16.3895	11.6596	-0.491263	-2.12242	0.00015	0.00444151	yes	down	FBgn0015570	dme:Dmel_CG2505
gene:FBgn0016726	gene:FBgn0016726	RpL29	2R:21293767-21295588	Control	HA	OK	8908.6	6272.98	-0.506049	-2.27113	0.00015	0.00444151	yes	down	FBgn0016726	dme:Dmel_CG10071
gene:FBgn0026879	gene:FBgn0026879	CG13364	X:623467-625203	Control	HA	OK	1378.9	992.965	-0.473698	-2.06501	0.00015	0.00444151	yes	down	FBgn0026879	dme:Dmel_CG13364
gene:FBgn0031533	gene:FBgn0031533	CG2772	2L:3445991-3447589	Control	HA	OK	19.3721	13.0536	-0.569533	-2.3091	0.00015	0.00444151	yes	down	FBgn0031533	dme:Dmel_CG2772
gene:FBgn0033970	gene:FBgn0033970	CG10205	2R:14832831-14833951	Control	HA	OK	27.46	18.4354	-0.574851	-2.128	0.00015	0.00444151	yes	down	FBgn0033970	dme:Dmel_CG10205
gene:FBgn0035265	gene:FBgn0035265	PIG-Wb	3L:1735852-1738106	Control	HA	OK	3.71319	2.17694	-0.77036	-2.21574	0.00015	0.00444151	yes	down	FBgn0035265	dme:Dmel_CG18173
gene:FBgn0037553	gene:FBgn0037553	CG18249	3R:8220145-8222188	Control	HA	OK	5.47685	3.46399	-0.660911	-2.18401	0.00015	0.00444151	yes	down	FBgn0037553	dme:Dmel_CG18249
gene:FBgn0038011	gene:FBgn0038011	CG4066	3R:12311352-12313119	Control	HA	OK	3.22718	1.82925	-0.819018	-2.18294	0.00015	0.00444151	yes	down	FBgn0038011	dme:Dmel_CG4066
gene:FBgn0039313	gene:FBgn0039313	CG11892	3R:25281547-25283237	Control	HA	OK	270.164	194.428	-0.474601	-2.28166	0.00015	0.00444151	yes	down	FBgn0039313	dme:Dmel_CG11892
gene:FBgn0040096	gene:FBgn0040096	lectin-33A	2L:11002071-11002738	Control	HA	OK	11.4243	5.65145	-1.01541	-2.74657	0.00015	0.00444151	yes	down	FBgn0040096	dme:Dmel_CG16834
gene:FBgn0051087	gene:FBgn0051087	CG31087	3R:25311026-25313833	Control	HA	OK	11.4075	7.32909	-0.638275	-2.25119	0.00015	0.00444151	yes	down	FBgn0051087	dme:Dmel_CG31087
gene:FBgn0051781	gene:FBgn0051781	CR31781	2L:16869345-16878300	Control	HA	OK	100.668	73.083	-0.461997	-2.26591	0.00015	0.00444151	yes	down	FBgn0051781	dme:Dmel_CR31781
gene:FBgn0061356	gene:FBgn0061356	CG18003	2R:10883546-10884936	Control	HA	OK	39.3333	28.4461	-0.467519	-2.20696	0.00015	0.00444151	yes	down	FBgn0061356	dme:Dmel_CG18003
gene:FBgn0085813	gene:FBgn0085813	18SrRNA-Psi:CR41602	X:23211191-23213166	Control	HA	OK	85.344	62.268	-0.454799	-2.2646	0.00015	0.00444151	yes	down	FBgn0085813	dme:Dmel_CR41602
gene:FBgn0262531	gene:FBgn0262531	CG43085	3L:17645485-17646737	Control	HA	OK	9.37416	5.75104	-0.704867	-2.15577	0.00015	0.00444151	yes	down	FBgn0262531	dme:Dmel_CG43085
gene:FBgn0264748	gene:FBgn0264748	CG44006	3L:18068727-18070150	Control	HA	OK	3.61693	1.88297	-0.941755	-2.31739	0.00015	0.00444151	yes	down	FBgn0264748	dme:Dmel_CG44006
gene:FBgn0002570	gene:FBgn0002570	Mal-A1	2R:8447450-8451904	Control	HA	OK	99.3159	67.3407	-0.560545	-2.38031	0.0002	0.00559549	yes	down	FBgn0002570	dme:Dmel_CG8696
gene:FBgn0002578	gene:FBgn0002578	Kaz-m1	3R:26014720-26016487	Control	HA	OK	85.8622	59.4576	-0.530162	-2.20479	0.0002	0.00559549	yes	down	FBgn0002578	dme:Dmel_CG8342
gene:FBgn0016694	gene:FBgn0016694	Pdp1	3L:7811457-7867369	Control	HA	OK	30.9979	22.3751	-0.470275	-2.32976	0.0002	0.00559549	yes	down	FBgn0016694	dme:Dmel_CG17888
gene:FBgn0027586	gene:FBgn0027586	CG5867	2L:13236493-13239297	Control	HA	OK	105.093	77.2818	-0.443467	-2.21585	0.0002	0.00559549	yes	down	FBgn0027586	dme:Dmel_CG5867
gene:FBgn0028697	gene:FBgn0028697	RpL15	3L:27267254-27268445	Control	HA	OK	3801.34	2644.15	-0.523706	-2.15104	0.0002	0.00559549	yes	down	FBgn0028697	dme:Dmel_CG17420
gene:FBgn0031776	gene:FBgn0031776	Pfdn1	2L:6069078-6070686	Control	HA	OK	347.975	248.977	-0.482974	-2.2441	0.0002	0.00559549	yes	down	FBgn0031776	dme:Dmel_CG13993
gene:FBgn0032213	gene:FBgn0032213	CG5390	2L:10304068-10306594	Control	HA	OK	57.1145	42.1783	-0.437357	-2.14388	0.0002	0.00559549	yes	down	FBgn0032213	dme:Dmel_CG5390
gene:FBgn0033297	gene:FBgn0033297	Mal-A8	2R:8471953-8532294	Control	HA	OK	8.04918	4.21147	-0.934517	-2.58184	0.0002	0.00559549	yes	down	FBgn0033297	dme:Dmel_CG8690
gene:FBgn0034086	gene:FBgn0034086	CG8441	2R:16185121-16186506	Control	HA	OK	107.84	78.189	-0.46385	-2.21943	0.0002	0.00559549	yes	down	FBgn0034086	dme:Dmel_CG8441
gene:FBgn0036831	gene:FBgn0036831	CG6839	3L:18917580-18920319	Control	HA	OK	13.9714	9.17219	-0.607142	-2.28464	0.0002	0.00559549	yes	down	FBgn0036831	dme:Dmel_CG6839
gene:FBgn0037577	gene:FBgn0037577	CG7443	3R:8316983-8333792	Control	HA	OK	145.684	105.838	-0.460984	-2.01685	0.0002	0.00559549	yes	down	FBgn0037577	dme:Dmel_CG7443
gene:FBgn0037762	gene:FBgn0037762	eloF	3R:9814160-9815158	Control	HA	OK	128.274	94.4987	-0.440866	-2.20777	0.0002	0.00559549	yes	down	FBgn0037762	dme:Dmel_CG16905
gene:FBgn0037848	gene:FBgn0037848	Tsp86D	3R:10868707-10870555	Control	HA	OK	24.9041	18.3458	-0.440937	-2.10216	0.0002	0.00559549	yes	down	FBgn0037848	dme:Dmel_CG4591
gene:FBgn0038098	gene:FBgn0038098	CG7381	3R:12967774-12977471	Control	HA	OK	5.66757	3.55465	-0.673024	-2.29361	0.0002	0.00559549	yes	down	FBgn0038098	dme:Dmel_CG7381
gene:FBgn0038142	gene:FBgn0038142	CheA87a	3R:13369647-13371904	Control	HA	OK	12.5258	6.69099	-0.904606	-2.3231	0.0002	0.00559549	yes	down	FBgn0038142	dme:Dmel_CG14379
gene:FBgn0038446	gene:FBgn0038446	CG14903	3R:16573178-16573752	Control	HA	OK	83.1977	58.2064	-0.515367	-2.38513	0.0002	0.00559549	yes	down	FBgn0038446	dme:Dmel_CG14903
gene:FBgn0038672	gene:FBgn0038672	CG6005	3R:19022457-19024030	Control	HA	OK	22.0877	15.5794	-0.503605	-2.16003	0.0002	0.00559549	yes	down	FBgn0038672	dme:Dmel_CG6005
gene:FBgn0040832	gene:FBgn0040832	CG8012	3L:8215279-8216198	Control	HA	OK	36.1397	23.2567	-0.635939	-2.01551	0.0002	0.00559549	yes	down	FBgn0040832	dme:Dmel_CG8012
gene:FBgn0085330	gene:FBgn0085330	CG34301	3R:8773434-8773810	Control	HA	OK	54.8374	31.2403	-0.811751	-2.16004	0.0002	0.00559549	yes	down	FBgn0085330	dme:Dmel_CG34301
gene:FBgn0264750	gene:FBgn0264750	CG44008	2L:11814155-11928572	Control	HA	OK	344.267	191.609	-0.845359	-2.21569	0.0002	0.00559549	yes	down	FBgn0264750	dme:Dmel_CG44008
gene:FBgn0011705	gene:FBgn0011705	rost	2L:8985935-8989539	Control	HA	OK	55.7034	42.2138	-0.400051	-2.00755	0.00025	0.00670853	yes	down	FBgn0011705	dme:Dmel_CG9552
gene:FBgn0019932	gene:FBgn0019932	SamDC	2L:10339456-10341503	Control	HA	OK	55.1874	41.572	-0.408728	-2.01961	0.00025	0.00670853	yes	down	FBgn0019932	dme:Dmel_CG5029
gene:FBgn0027844	gene:FBgn0027844	CAH1	2L:13803625-13811474	Control	HA	OK	95.1725	69.5969	-0.451522	-2.13116	0.00025	0.00670853	yes	down	FBgn0027844	dme:Dmel_CG7820
gene:FBgn0030756	gene:FBgn0030756	CG9903	X:16539152-16540852	Control	HA	OK	6.25174	3.77914	-0.726197	-2.37211	0.00025	0.00670853	yes	down	FBgn0030756	dme:Dmel_CG9903
gene:FBgn0032652	gene:FBgn0032652	CG6870	2L:17591314-17604387	Control	HA	OK	69.4462	50.2841	-0.465794	-2.10187	0.00025	0.00670853	yes	down	FBgn0032652	dme:Dmel_CG6870
gene:FBgn0033961	gene:FBgn0033961	ND-B15	2R:14756515-14757846	Control	HA	OK	901.412	664.443	-0.440042	-2.07043	0.00025	0.00670853	yes	down	FBgn0033961	dme:Dmel_CG12859
gene:FBgn0038292	gene:FBgn0038292	CG3987	3R:15135137-15141715	Control	HA	OK	25.6653	17.3064	-0.568515	-2.12394	0.00025	0.00670853	yes	down	FBgn0038292	dme:Dmel_CG3987
gene:FBgn0039116	gene:FBgn0039116	CG10375	3R:23767711-23772859	Control	HA	OK	59.9067	39.7485	-0.591819	-2.07559	0.00025	0.00670853	yes	down	FBgn0039116	dme:Dmel_CG10375
gene:FBgn0053199	gene:FBgn0053199	CG33199	2R:8947680-8951086	Control	HA	OK	199.637	139.927	-0.512708	-2.28202	0.00025	0.00670853	yes	down	FBgn0053199	dme:Dmel_CG33199
gene:FBgn0053481	gene:FBgn0053481	dpr7	4:247123-253329	Control	HA	OK	14.8256	10.2549	-0.531776	-2.21744	0.00025	0.00670853	yes	down	FBgn0053481	dme:Dmel_CG33481
gene:FBgn0053514	gene:FBgn0053514	CG33514	3L:4365433-4367458	Control	HA	OK	20.7246	13.2761	-0.642518	-2.15478	0.00025	0.00670853	yes	down	FBgn0053514	dme:Dmel_CG33514
gene:FBgn0259101	gene:FBgn0259101	CG42249	X:11096272-11108148	Control	HA	OK	21.6706	15.604	-0.473825	-2.15711	0.00025	0.00670853	yes	down	FBgn0259101	dme:Dmel_CG42249
gene:FBgn0259722	gene:FBgn0259722	CG42376	X:254875-255524	Control	HA	OK	200.961	149.885	-0.423063	-2.22003	0.00025	0.00670853	yes	down	FBgn0259722	dme:Dmel_CG42376
gene:FBgn0259896	gene:FBgn0259896	NimC1	2L:13973157-13976769	Control	HA	OK	7.22249	4.77608	-0.596668	-2.08562	0.00025	0.00670853	yes	down	FBgn0259896	dme:Dmel_CG8942
gene:FBgn0261675	gene:FBgn0261675	Npc1b	X:20934868-20939503	Control	HA	OK	2.75545	1.84137	-0.581505	-2.07259	0.00025	0.00670853	yes	down	FBgn0261675	dme:Dmel_CG12092
gene:FBgn0010425	gene:FBgn0010425	epsilonTry	2R:11345236-11346066	Control	HA	OK	1185.98	868.152	-0.450058	-2.09712	0.0003	0.00777007	yes	down	FBgn0010425	dme:Dmel_CG18681
gene:FBgn0032074	gene:FBgn0032074	Tsp29Fa	2L:8933961-8936096	Control	HA	OK	66.011	48.445	-0.446357	-2.12124	0.0003	0.00777007	yes	down	FBgn0032074	dme:Dmel_CG9494
gene:FBgn0032209	gene:FBgn0032209	Hand	2L:10292678-10295385	Control	HA	OK	8.79072	4.79016	-0.875907	-2.24231	0.0003	0.00777007	yes	down	FBgn0032209	dme:Dmel_CG18144
gene:FBgn0034971	gene:FBgn0034971	CG3209	2R:24068756-24073552	Control	HA	OK	80.4028	60.8082	-0.402981	-1.98849	0.0003	0.00777007	yes	down	FBgn0034971	dme:Dmel_CG3209
gene:FBgn0036766	gene:FBgn0036766	CG5506	3L:17879095-17884376	Control	HA	OK	283.679	210.492	-0.430495	-2.00286	0.0003	0.00777007	yes	down	FBgn0036766	dme:Dmel_CG5506
gene:FBgn0038739	gene:FBgn0038739	CG4686	3R:19864495-19875678	Control	HA	OK	88.6461	55.9931	-0.662808	-1.9906	0.0003	0.00777007	yes	down	FBgn0038739	dme:Dmel_CG4686
gene:FBgn0038790	gene:FBgn0038790	MtnC	3R:20360307-20360634	Control	HA	OK	1986.3	1475.96	-0.428428	-2.13957	0.0003	0.00777007	yes	down	FBgn0038790	dme:Dmel_CG5097
gene:FBgn0040735	gene:FBgn0040735	CG16836	2R:18388994-18389443	Control	HA	OK	242.908	179.75	-0.434413	-2.06477	0.0003	0.00777007	yes	down	FBgn0040735	dme:Dmel_CG16836
gene:FBgn0050272	gene:FBgn0050272	MFS1	2R:22829643-22831877	Control	HA	OK	12.1125	8.82543	-0.456752	-1.99026	0.0003	0.00777007	yes	down	FBgn0050272	dme:Dmel_CG30272
gene:FBgn0051266	gene:FBgn0051266	CG31266	3R:17132661-17133719	Control	HA	OK	25.872	18.0823	-0.516813	-2.10216	0.0003	0.00777007	yes	down	FBgn0051266	dme:Dmel_CG31266
gene:FBgn0085257	gene:FBgn0085257	CG34228	2R:11651856-11652339	Control	HA	OK	66.7805	47.032	-0.505785	-2.13062	0.0003	0.00777007	yes	down	FBgn0085257	dme:Dmel_CG34228
gene:FBgn0086608	gene:FBgn0086608	CG34112	3R:4390365-4394493	Control	HA	OK	24.0304	13.0241	-0.883676	-2.23626	0.0003	0.00777007	yes	down	FBgn0086608	dme:Dmel_CG34112
gene:FBgn0267611	gene:FBgn0267611	CR45949	2L:9948907-9951122	Control	HA	OK	1.5352	0.796633	-0.946439	-2.26855	0.0003	0.00777007	yes	down	FBgn0267611
gene:FBgn0023197	gene:FBgn0023197	Jon74E	3L:17546738-17549127	Control	HA	OK	2.68514	1.11339	-1.27004	-2.38855	0.00035	0.00885952	yes	down	FBgn0023197	dme:Dmel_CG6298
gene:FBgn0032420	gene:FBgn0032420	CG6583	2L:12170549-12172586	Control	HA	OK	30.4784	22.3061	-0.450344	-2.08853	0.00035	0.00885952	yes	down	FBgn0032420	dme:Dmel_CG6583
gene:FBgn0033367	gene:FBgn0033367	PPO2	2R:9042260-9044709	Control	HA	OK	3.61418	2.06885	-0.804839	-2.18294	0.00035	0.00885952	yes	down	FBgn0033367	dme:Dmel_CG42640
gene:FBgn0033813	gene:FBgn0033813	fsd	2R:13230582-13231663	Control	HA	OK	31.8754	22.9463	-0.474182	-2.05136	0.00035	0.00885952	yes	down	FBgn0033813	dme:Dmel_CG12765
gene:FBgn0038252	gene:FBgn0038252	BigH1	3R:14663449-14664822	Control	HA	OK	305.286	227.571	-0.423844	-2.12466	0.00035	0.00885952	yes	down	FBgn0038252	dme:Dmel_CG3509
gene:FBgn0041004	gene:FBgn0041004	CG17715	2L:22844219-22854541	Control	HA	OK	22.1834	16.2749	-0.446838	-2.04925	0.00035	0.00885952	yes	down	FBgn0041004	dme:Dmel_CG17715
gene:FBgn0042186	gene:FBgn0042186	CG17239	2L:2251509-2252341	Control	HA	OK	86.4724	63.9811	-0.434593	-2.21701	0.00035	0.00885952	yes	down	FBgn0042186	dme:Dmel_CG17239
gene:FBgn0054034	gene:FBgn0054034	CG34034	3R:21738344-21739110	Control	HA	OK	6.03557	3.20781	-0.911904	-2.12548	0.00035	0.00885952	yes	down	FBgn0054034	dme:Dmel_CG34034
gene:FBgn0001234	gene:FBgn0001234	Hsromega	3R:21296126-21317836	Control	HA	OK	141.378	103.518	-0.449666	-2.08724	0.0004	0.00985695	yes	down	FBgn0001234	dme:Dmel_CR31400
gene:FBgn0026314	gene:FBgn0026314	Ugt35b	3R:11168502-11170246	Control	HA	OK	35.5049	26.2772	-0.434204	-2.12088	0.0004	0.00985695	yes	down	FBgn0026314	dme:Dmel_CG6649
gene:FBgn0030929	gene:FBgn0030929	CG15043	X:18493192-18494168	Control	HA	OK	42.0245	28.8033	-0.545	-2.19885	0.0004	0.00985695	yes	down	FBgn0030929	dme:Dmel_CG15043
gene:FBgn0031270	gene:FBgn0031270	CG13689	2L:602812-604430	Control	HA	OK	14.8785	8.3751	-0.829047	-2.31074	0.0004	0.00985695	yes	down	FBgn0031270	dme:Dmel_CG13689
gene:FBgn0031939	gene:FBgn0031939	CG13796	2L:7727156-7732670	Control	HA	OK	7.26243	5.26151	-0.464975	-2.00386	0.0004	0.00985695	yes	down	FBgn0031939	dme:Dmel_CG13796
gene:FBgn0034761	gene:FBgn0034761	CG4250	2R:22663691-22664474	Control	HA	OK	139.486	103.892	-0.425035	-2.12418	0.0004	0.00985695	yes	down	FBgn0034761	dme:Dmel_CG4250
gene:FBgn0035321	gene:FBgn0035321	CG1275	3L:2252743-2257423	Control	HA	OK	50.9552	38.0548	-0.421149	-2.04037	0.0004	0.00985695	yes	down	FBgn0035321	dme:Dmel_CG1275
gene:FBgn0036929	gene:FBgn0036929	CG7668	3L:20002735-20004834	Control	HA	OK	62.893	47.6358	-0.400854	-2.0163	0.0004	0.00985695	yes	down	FBgn0036929	dme:Dmel_CG7668
gene:FBgn0040827	gene:FBgn0040827	CG13315	3L:9096876-9097494	Control	HA	OK	1148.5	814.807	-0.495216	-2.26396	0.0004	0.00985695	yes	down	FBgn0040827	dme:Dmel_CG13315
gene:FBgn0243514	gene:FBgn0243514	eater	3R:27095866-27099679	Control	HA	OK	1.76705	1.0143	-0.80086	-2.07589	0.0004	0.00985695	yes	down	FBgn0243514	dme:Dmel_CG6124
gene:FBgn0262004	gene:FBgn0262004	CG42822	3R:17413900-17414607	Control	HA	OK	9.31609	5.38262	-0.791416	-2.14315	0.0004	0.00985695	yes	down	FBgn0262004	dme:Dmel_CG42822
gene:FBgn0002569	gene:FBgn0002569	Mal-A2	2R:8453626-8455782	Control	HA	OK	10.9876	7.8315	-0.488515	-2.0309	0.00045	0.0107797	yes	down	FBgn0002569	dme:Dmel_CG8694
gene:FBgn0013687	gene:FBgn0013687	mt:ori	mitochondrion_genome:14916-19524	Control	HA	OK	1.09167	0.452227	-1.27141	-3.52706	0.00045	0.0107797	yes	down	FBgn0013687
gene:FBgn0031670	gene:FBgn0031670	CG3887	2L:5010921-5012127	Control	HA	OK	190.902	144.345	-0.403317	-2.05222	0.00045	0.0107797	yes	down	FBgn0031670	dme:Dmel_CG3887
gene:FBgn0032775	gene:FBgn0032775	CG17544	2L:19390369-19398493	Control	HA	OK	72.0316	54.2535	-0.408913	-2.05143	0.00045	0.0107797	yes	down	FBgn0032775	dme:Dmel_CG17544
gene:FBgn0033446	gene:FBgn0033446	CG1648	2R:9810973-9820053	Control	HA	OK	1824.9	1284.48	-0.506631	-2.12225	0.00045	0.0107797	yes	down	FBgn0033446	dme:Dmel_CG1648
gene:FBgn0035603	gene:FBgn0035603	Pfdn4	3L:5366454-5368008	Control	HA	OK	304.441	225.216	-0.434855	-2.04187	0.00045	0.0107797	yes	down	FBgn0035603	dme:Dmel_CG10635
gene:FBgn0040020	gene:FBgn0040020	MED21	3L:25107593-25115946	Control	HA	OK	104.986	60.2093	-0.80214	-2.32653	0.00045	0.0107797	yes	down	FBgn0040020	dme:Dmel_CG17397
gene:FBgn0042213	gene:FBgn0042213	CG18731	3R:29725026-29725690	Control	HA	OK	34.7094	24.0365	-0.530101	-2.19353	0.00045	0.0107797	yes	down	FBgn0042213	dme:Dmel_CG18731
gene:FBgn0051189	gene:FBgn0051189	CG31189	3R:21044067-21045842	Control	HA	OK	9.69891	5.93941	-0.707502	-2.08171	0.00045	0.0107797	yes	down	FBgn0051189	dme:Dmel_CG31189
gene:FBgn0260866	gene:FBgn0260866	dnr1	2R:22563151-22592964	Control	HA	OK	12.9372	9.5574	-0.43684	-1.99437	0.00045	0.0107797	yes	down	FBgn0260866	dme:Dmel_CG12489
gene:FBgn0264990	gene:FBgn0264990	CG44141	2L:15644182-15718272	Control	HA	OK	35.9671	21.2533	-0.758988	-2.07346	0.00045	0.0107797	yes	down	FBgn0264990	dme:Dmel_CG44140
gene:FBgn0267515	gene:FBgn0267515	28SrRNA-Psi:CR45855	X:23205821-23206525	Control	HA	OK	119.442	90.7782	-0.395895	-2.00076	0.00045	0.0107797	yes	down	FBgn0267515
gene:FBgn0030584	gene:FBgn0030584	CG14407	X:14837470-14838198	Control	HA	OK	172.35	129.882	-0.408146	-2.02941	0.0005	0.0117258	yes	down	FBgn0030584	dme:Dmel_CG14407
gene:FBgn0032774	gene:FBgn0032774	CG17549	2L:19387049-19390075	Control	HA	OK	111.346	84.4608	-0.398695	-1.98282	0.0005	0.0117258	yes	down	FBgn0032774	dme:Dmel_CG17549
gene:FBgn0033945	gene:FBgn0033945	CG12868	2R:14604548-14605297	Control	HA	OK	36.949	26.3998	-0.485007	-2.0651	0.0005	0.0117258	yes	down	FBgn0033945	dme:Dmel_CG12868
gene:FBgn0038135	gene:FBgn0038135	CG8773	3R:13294747-13298288	Control	HA	OK	24.825	18.6	-0.416494	-2.0631	0.0005	0.0117258	yes	down	FBgn0038135	dme:Dmel_CG8773
gene:FBgn0039086	gene:FBgn0039086	CG16732	3R:23534899-23536710	Control	HA	OK	2.52184	1.42285	-0.825695	-2.06642	0.0005	0.0117258	yes	down	FBgn0039086	dme:Dmel_CG16732
gene:FBgn0063492	gene:FBgn0063492	GstE8	2R:18407833-18408955	Control	HA	OK	44.3581	32.1968	-0.462281	-1.96904	0.0005	0.0117258	yes	down	FBgn0063492	dme:Dmel_CG17533
gene:FBgn0031365	gene:FBgn0031365	CG17650	2L:1758285-1759093	Control	HA	OK	15.7872	9.55235	-0.72483	-2.07381	0.00055	0.0125812	yes	down	FBgn0031365	dme:Dmel_CG17650
gene:FBgn0032770	gene:FBgn0032770	CG13086	2L:19364374-19365470	Control	HA	OK	27.4339	18.3425	-0.580768	-1.95017	0.00055	0.0125812	yes	down	FBgn0032770	dme:Dmel_CG13086
gene:FBgn0033222	gene:FBgn0033222	CG12824	2R:7790367-7791170	Control	HA	OK	30.3853	20.2098	-0.588319	-2.06183	0.00055	0.0125812	yes	down	FBgn0033222	dme:Dmel_CG12824
gene:FBgn0033769	gene:FBgn0033769	CG8768	2R:12691307-12692690	Control	HA	OK	60.866	45.7908	-0.410581	-2.03956	0.00055	0.0125812	yes	down	FBgn0033769	dme:Dmel_CG8768
gene:FBgn0038363	gene:FBgn0038363	Acyp2	3R:15792687-15793487	Control	HA	OK	59.9171	43.3185	-0.467987	-1.98701	0.00055	0.0125812	yes	down	FBgn0038363	dme:Dmel_CG18505
gene:FBgn0040718	gene:FBgn0040718	CG15353	2L:2006762-2007688	Control	HA	OK	118.689	84.0286	-0.498228	-2.23421	0.00055	0.0125812	yes	down	FBgn0040718	dme:Dmel_CG15353
gene:FBgn0045800	gene:FBgn0045800	Uhg1	2R:17699096-17719346	Control	HA	OK	70.7676	38.6899	-0.871131	-2.05462	0.00055	0.0125812	yes	down	FBgn0045800	dme:Dmel_CR32886
gene:FBgn0052163	gene:FBgn0052163	CG32163	3L:16587110-16588143	Control	HA	OK	13.5439	9.22682	-0.553737	-1.99745	0.00055	0.0125812	yes	down	FBgn0052163	dme:Dmel_CG32163
gene:FBgn0283652	gene:FBgn0283652	Rpp30	2L:251038-252373	Control	HA	OK	26.8942	18.7812	-0.51801	-2.15396	0.00055	0.0125812	yes	down	FBgn0283652	dme:Dmel_CG11606
gene:FBgn0004919	gene:FBgn0004919	gol	2R:25072626-25084347	Control	HA	OK	5.06956	3.42468	-0.565891	-2.09268	0.0006	0.0133689	yes	down	FBgn0004919	dme:Dmel_CG2679
gene:FBgn0029697	gene:FBgn0029697	CG15570	X:4218169-4223331	Control	HA	OK	19.7053	14.9406	-0.399352	-1.93297	0.0006	0.0133689	yes	down	FBgn0029697	dme:Dmel_CG15570
gene:FBgn0034293	gene:FBgn0034293	CG14495	2R:18048107-18049922	Control	HA	OK	9.34156	5.42527	-0.783967	-2.15648	0.0006	0.0133689	yes	down	FBgn0034293	dme:Dmel_CG14495
gene:FBgn0034507	gene:FBgn0034507	CG11192	2R:20354107-20355067	Control	HA	OK	11.3668	7.19319	-0.660116	-2.06838	0.0006	0.0133689	yes	down	FBgn0034507	dme:Dmel_CG11192
gene:FBgn0037562	gene:FBgn0037562	CG11671	3R:8287875-8288613	Control	HA	OK	20.1598	12.5984	-0.678233	-2.13606	0.0006	0.0133689	yes	down	FBgn0037562	dme:Dmel_CG11671
gene:FBgn0051373	gene:FBgn0051373	CG31373	3R:10708486-10709364	Control	HA	OK	124.294	94.1956	-0.400021	-1.9489	0.0006	0.0133689	yes	down	FBgn0051373	dme:Dmel_CG31373
gene:FBgn0051826	gene:FBgn0051826	CG31826	2L:15771262-15773113	Control	HA	OK	8.45774	5.19218	-0.703933	-2.05774	0.0006	0.0133689	yes	down	FBgn0051826	dme:Dmel_CG31826
gene:FBgn0000079	gene:FBgn0000079	Amy-p	2R:17118635-17120303	Control	HA	OK	406.801	301.707	-0.431176	-2.14398	0.00065	0.0141995	yes	down	FBgn0000079	dme:Dmel_CG18730
gene:FBgn0029950	gene:FBgn0029950	CG9657	X:7418593-7422142	Control	HA	OK	1.92013	1.10933	-0.791511	-2.05006	0.00065	0.0141995	yes	down	FBgn0029950	dme:Dmel_CG9657
gene:FBgn0038037	gene:FBgn0038037	Cyp9f2	3R:12403339-12406028	Control	HA	OK	76.5425	58.4774	-0.388382	-1.94484	0.00065	0.0141995	yes	down	FBgn0038037	dme:Dmel_CG11466
gene:FBgn0039081	gene:FBgn0039081	Irk2	3R:23513616-23519445	Control	HA	OK	18.1966	13.4827	-0.432563	-1.97558	0.00065	0.0141995	yes	down	FBgn0039081	dme:Dmel_CG4370
gene:FBgn0051086	gene:FBgn0051086	CG31086	3R:26170846-26188807	Control	HA	OK	243.881	166.447	-0.551117	-1.94602	0.00065	0.0141995	yes	down	FBgn0051086	dme:Dmel_CG31086
gene:FBgn0052364	gene:FBgn0052364	tut	3L:8209576-8210743	Control	HA	OK	42.7189	31.9364	-0.419671	-1.98037	0.00065	0.0141995	yes	down	FBgn0052364	dme:Dmel_CG32364
gene:FBgn0265089	gene:FBgn0265089	eIF4E3	3L:8229223-8230568	Control	HA	OK	21.639	15.2249	-0.507201	-2.03219	0.00065	0.0141995	yes	down	FBgn0265089	dme:Dmel_CG8023
gene:FBgn0266044	gene:FBgn0266044	CR44809	2L:22169667-22170204	Control	HA	OK	4.39347	1.78213	-1.30176	-2.3214	0.00065	0.0141995	yes	down	FBgn0266044	dme:Dmel_CR44809
gene:FBgn0266598	gene:FBgn0266598	Kmn2	3R:7999831-8001309	Control	HA	OK	78.8782	54.1347	-0.543072	-2.01905	0.00065	0.0141995	yes	down	FBgn0266598	dme:Dmel_CG42550
gene:FBgn0285958	gene:FBgn0285958	Fuca	3L:11513704-11522713	Control	HA	OK	2.76687	1.33871	-1.04741	-2.16123	0.00065	0.0141995	yes	down	FBgn0285958	dme:Dmel_CG6128
gene:FBgn0027562	gene:FBgn0027562	CG10345	3R:16594413-16604861	Control	HA	OK	10.9746	7.93368	-0.468108	-1.89634	0.0007	0.0150271	yes	down	FBgn0027562	dme:Dmel_CG10345
gene:FBgn0031700	gene:FBgn0031700	CG14022	2L:5327974-5328879	Control	HA	OK	118.886	89.39	-0.411397	-2.00208	0.0007	0.0150271	yes	down	FBgn0031700	dme:Dmel_CG14022
gene:FBgn0032433	gene:FBgn0032433	Oatp33Ea	2L:12441400-12445924	Control	HA	OK	6.43453	4.67049	-0.46226	-1.91915	0.0007	0.0150271	yes	down	FBgn0032433	dme:Dmel_CG5427
gene:FBgn0035663	gene:FBgn0035663	CG6462	3L:6037110-6038188	Control	HA	OK	1.4346	0.53122	-1.43327	-2.15513	0.0007	0.0150271	yes	down	FBgn0035663	dme:Dmel_CG6462
gene:FBgn0039233	gene:FBgn0039233	CG7006	3R:24850626-24851385	Control	HA	OK	86.5516	65.0491	-0.412032	-1.97084	0.0007	0.0150271	yes	down	FBgn0039233	dme:Dmel_CG7006
gene:FBgn0039356	gene:FBgn0039356	CG5039	3R:25678682-25680550	Control	HA	OK	18.0498	10.9608	-0.719632	-1.94444	0.0007	0.0150271	yes	down	FBgn0039356	dme:Dmel_CG5039
gene:FBgn0040491	gene:FBgn0040491	Buffy	2R:11679491-11688557	Control	HA	OK	12.866	8.66855	-0.569696	-1.98378	0.0007	0.0150271	yes	down	FBgn0040491	dme:Dmel_CG8238
gene:FBgn0025595	gene:FBgn0025595	AkhR	2L:6711285-6716186	Control	HA	OK	22.2542	16.2813	-0.450867	-2.04394	0.00075	0.0157669	yes	down	FBgn0025595	dme:Dmel_CG11325
gene:FBgn0029696	gene:FBgn0029696	CG15571	X:4216872-4217394	Control	HA	OK	27.0121	17.348	-0.638835	-1.9247	0.00075	0.0157669	yes	down	FBgn0029696	dme:Dmel_CG15571
gene:FBgn0029990	gene:FBgn0029990	CG2233	X:8035740-8037517	Control	HA	OK	596.755	440.041	-0.439502	-1.95056	0.00075	0.0157669	yes	down	FBgn0029990	dme:Dmel_CG2233
gene:FBgn0031424	gene:FBgn0031424	VGlut	2L:2391659-2415322	Control	HA	OK	2.75701	1.98132	-0.476641	-2.02551	0.00075	0.0157669	yes	down	FBgn0031424	dme:Dmel_CG9887
gene:FBgn0033423	gene:FBgn0033423	CG1809	2R:9559254-9565190	Control	HA	OK	16.9241	12.0493	-0.49013	-2.02095	0.00075	0.0157669	yes	down	FBgn0033423	dme:Dmel_CG1809
gene:FBgn0037290	gene:FBgn0037290	CG1124	3R:4965444-4968485	Control	HA	OK	39.5635	29.3083	-0.43286	-2.01987	0.00075	0.0157669	yes	down	FBgn0037290	dme:Dmel_CG1124
gene:FBgn0051313	gene:FBgn0051313	CG31313	3R:14565926-14567429	Control	HA	OK	191.824	143.3	-0.420742	-1.89219	0.00075	0.0157669	yes	down	FBgn0051313	dme:Dmel_CG31313
gene:FBgn0262572	gene:FBgn0262572	CG43112	2R:11249593-11249933	Control	HA	OK	120.937	88.1791	-0.455752	-2.09568	0.00075	0.0157669	yes	down	FBgn0262572	dme:Dmel_CG43112
gene:FBgn0267519	gene:FBgn0267519	28SrRNA-Psi:CR45859	X:23214451-23217140	Control	HA	OK	102.156	77.5972	-0.396697	-1.98718	0.00075	0.0157669	yes	down	FBgn0267519
gene:FBgn0035482	gene:FBgn0035482	CG14985	3L:4003473-4006626	Control	HA	OK	17.1076	12.6793	-0.432164	-1.9177	0.0008	0.0165685	yes	down	FBgn0035482	dme:Dmel_CG14985
gene:FBgn0036726	gene:FBgn0036726	QIL1	3L:17465944-17466768	Control	HA	OK	426.946	323.861	-0.398682	-1.97762	0.0008	0.0165685	yes	down	FBgn0036726	dme:Dmel_CG7603
gene:FBgn0051004	gene:FBgn0051004	mesh	3R:31178388-31195762	Control	HA	OK	12.3794	9.22605	-0.424159	-2.03652	0.0008	0.0165685	yes	down	FBgn0051004	dme:Dmel_CG31004
gene:FBgn0052068	gene:FBgn0052068	Adi1	3L:10663375-10664435	Control	HA	OK	92.6364	70.8537	-0.386737	-1.93214	0.0008	0.0165685	yes	down	FBgn0052068	dme:Dmel_CG32068
gene:FBgn0085732	gene:FBgn0085732	CR40190	2R:1211066-1213666	Control	HA	OK	13.5673	9.57404	-0.502931	-2.04026	0.0008	0.0165685	yes	down	FBgn0085732
gene:FBgn0264775	gene:FBgn0264775	CG44013	3R:15508895-15509917	Control	HA	OK	4.87951	2.67777	-0.865706	-1.93868	0.0008	0.0165685	yes	down	FBgn0264775	dme:Dmel_CG44013
gene:FBgn0043576	gene:FBgn0043576	PGRP-SC1a	2R:8709732-8710320	Control	HA	OK	65.8688	47.362	-0.475865	-2.07302	0.00085	0.0174102	yes	down	FBgn0043576	dme:Dmel_CG14746
gene:FBgn0265979	gene:FBgn0265979	CR44758	2R:22312875-22316604	Control	HA	OK	1.77324	0.559925	-1.66309	-2.46483	0.00085	0.0174102	yes	down	FBgn0265979	dme:Dmel_CR44758
gene:FBgn0028664	gene:FBgn0028664	VhaM9.7-c	3L:4173883-4193788	Control	HA	OK	47.5456	34.3234	-0.47012	-1.87098	0.0009	0.0182005	yes	down	FBgn0028664	dme:Dmel_CG11589
gene:FBgn0033480	gene:FBgn0033480	mRpL42	2R:10066649-10068702	Control	HA	OK	247.716	184.565	-0.424556	-1.96389	0.0009	0.0182005	yes	down	FBgn0033480	dme:Dmel_CG12921
gene:FBgn0033683	gene:FBgn0033683	CG18343	2R:12138694-12140229	Control	HA	OK	191.081	140.31	-0.44557	-1.92061	0.0009	0.0182005	yes	down	FBgn0033683	dme:Dmel_CG18343
gene:FBgn0000277	gene:FBgn0000277	CecA2	3R:30212155-30212568	Control	HA	OK	8.40409	2.37119	-1.82548	-2.27708	0.00095	0.0189711	yes	down	FBgn0000277	dme:Dmel_CG1367
gene:FBgn0011761	gene:FBgn0011761	dhd	X:5312170-5313125	Control	HA	OK	4006.67	2905.71	-0.463515	-1.868	0.00095	0.0189711	yes	down	FBgn0011761	dme:Dmel_CG4193
gene:FBgn0027101	gene:FBgn0027101	Dyrk3	4:1225088-1230713	Control	HA	OK	23.0417	17.6155	-0.387403	-1.97377	0.00095	0.0189711	yes	down	FBgn0027101	dme:Dmel_CG40478
gene:FBgn0029091	gene:FBgn0029091	CS-2	3L:21962400-21969964	Control	HA	OK	6.86424	5.10151	-0.428176	-1.90758	0.00095	0.0189711	yes	down	FBgn0029091	dme:Dmel_CG7464
gene:FBgn0037750	gene:FBgn0037750	Whamy	3R:9771794-9774419	Control	HA	OK	9.32824	6.27165	-0.57276	-1.95379	0.00095	0.0189711	yes	down	FBgn0037750	dme:Dmel_CG12946
gene:FBgn0261673	gene:FBgn0261673	nemy	2R:12659496-12670219	Control	HA	OK	28.4287	21.5649	-0.398662	-1.91304	0.00095	0.0189711	yes	down	FBgn0261673	dme:Dmel_CG8776
gene:FBgn0000339	gene:FBgn0000339	cni	2L:16309291-16310726	Control	HA	OK	86.667	66.2655	-0.387225	-1.87684	0.001	0.0196878	yes	down	FBgn0000339	dme:Dmel_CG5855
gene:FBgn0034128	gene:FBgn0034128	CG4409	2R:16443210-16444845	Control	HA	OK	5.71858	3.23376	-0.822444	-1.97635	0.001	0.0196878	yes	down	FBgn0034128	dme:Dmel_CG4409
gene:FBgn0040256	gene:FBgn0040256	Ugt86Dd	3R:11126596-11128328	Control	HA	OK	4.20784	2.59581	-0.696891	-1.95213	0.001	0.0196878	yes	down	FBgn0040256	dme:Dmel_CG6633
gene:FBgn0051157	gene:FBgn0051157	CG31157	3R:13047730-13049294	Control	HA	OK	7.00714	4.65138	-0.591167	-1.85941	0.001	0.0196878	yes	down	FBgn0051157	dme:Dmel_CG31157
gene:FBgn0086370	gene:FBgn0086370	sra	3R:16181019-16197584	Control	HA	OK	64.4073	47.7283	-0.43238	-1.9122	0.001	0.0196878	yes	down	FBgn0086370	dme:Dmel_CG6072
gene:FBgn0259998	gene:FBgn0259998	CG17571	2L:20255987-20257192	Control	HA	OK	358.165	274.452	-0.384071	-1.93891	0.001	0.0196878	yes	down	FBgn0259998	dme:Dmel_CG17571
gene:FBgn0260027	gene:FBgn0260027	CG42495	3L:18667360-18668135	Control	HA	OK	9.29927	5.61479	-0.727887	-1.97819	0.001	0.0196878	yes	down	FBgn0260027	dme:Dmel_CG42495
gene:FBgn0011706	gene:FBgn0011706	rpr	3L:18397534-18398435	Control	HA	OK	2.43291	1.00143	-1.28062	-2.0748	0.00105	0.0202089	yes	down	FBgn0011706	dme:Dmel_CG4319
gene:FBgn0013684	gene:FBgn0013684	mt:ND5	mitochondrion_genome:6408-8125	Control	HA	OK	185.892	140.775	-0.401079	-2.02474	0.00105	0.0202089	yes	down	FBgn0013684	dme:Dmel_CG34083
gene:FBgn0029959	gene:FBgn0029959	Rab39	X:7734922-7736756	Control	HA	OK	37.9076	28.9052	-0.391159	-1.8947	0.00105	0.0202089	yes	down	FBgn0029959	dme:Dmel_CG12156
gene:FBgn0030828	gene:FBgn0030828	CG5162	X:17215303-17217365	Control	HA	OK	34.6582	26.7135	-0.375627	-1.84052	0.00105	0.0202089	yes	down	FBgn0030828	dme:Dmel_CG5162
gene:FBgn0033047	gene:FBgn0033047	CG7882	2R:5957587-5960183	Control	HA	OK	42.0933	32.271	-0.383353	-1.8921	0.00105	0.0202089	yes	down	FBgn0033047	dme:Dmel_CG7882
gene:FBgn0033541	gene:FBgn0033541	CG12934	2R:10648887-10649830	Control	HA	OK	9.76515	6.00099	-0.702443	-1.99021	0.00105	0.0202089	yes	down	FBgn0033541	dme:Dmel_CG12934
gene:FBgn0035667	gene:FBgn0035667	Jon65Ai	3L:6053492-6054443	Control	HA	OK	117.476	90.0395	-0.383737	-1.96371	0.00105	0.0202089	yes	down	FBgn0035667	dme:Dmel_CG10475
gene:FBgn0036278	gene:FBgn0036278	CrzR	3L:12339115-12351544	Control	HA	OK	6.36765	4.63208	-0.459099	-1.86944	0.00105	0.0202089	yes	down	FBgn0036278	dme:Dmel_CG10698
gene:FBgn0038243	gene:FBgn0038243	CG8066	3R:14567610-14568847	Control	HA	OK	23.435	16.9999	-0.463139	-1.92498	0.00105	0.0202089	yes	down	FBgn0038243	dme:Dmel_CG8066
gene:FBgn0085753	gene:FBgn0085753	28SrRNA-Psi:CR40596	rDNA:16935-22940	Control	HA	OK	101.423	76.5336	-0.406224	-2.03491	0.00105	0.0202089	yes	down	FBgn0085753	dme:Dmel_CR40596
gene:FBgn0030575	gene:FBgn0030575	CG5321	X:14679567-14681418	Control	HA	OK	11.3266	7.64162	-0.567761	-1.97418	0.0011	0.0208832	yes	down	FBgn0030575	dme:Dmel_CG5321
gene:FBgn0035929	gene:FBgn0035929	CG13311	3L:8801539-8802164	Control	HA	OK	20.3707	13.0787	-0.639276	-1.97051	0.0011	0.0208832	yes	down	FBgn0035929	dme:Dmel_CG13311
gene:FBgn0040968	gene:FBgn0040968	CG14933	2L:11814155-11928572	Control	HA	OK	123.109	70.4017	-0.806257	-1.84312	0.0011	0.0208832	yes	down	FBgn0040968	dme:Dmel_CG14933
gene:FBgn0040993	gene:FBgn0040993	CG17325	2L:18812647-18813941	Control	HA	OK	91.8269	65.3455	-0.490828	-1.87921	0.0011	0.0208832	yes	down	FBgn0040993	dme:Dmel_CG17325
gene:FBgn0260798	gene:FBgn0260798	Gprk1	2R:4322294-4471060	Control	HA	OK	29.053	22.1929	-0.388589	-1.97104	0.0011	0.0208832	yes	down	FBgn0260798	dme:Dmel_CG40129
gene:FBgn0031653	gene:FBgn0031653	Jon25Biii	2L:4949940-4950767	Control	HA	OK	1268.37	956.948	-0.406463	-1.94674	0.00115	0.0215755	yes	down	FBgn0031653	dme:Dmel_CG8871
gene:FBgn0033085	gene:FBgn0033085	CG15908	2R:6668149-6668738	Control	HA	OK	73.8817	53.3147	-0.470684	-1.95356	0.00115	0.0215755	yes	down	FBgn0033085	dme:Dmel_CG15908
gene:FBgn0261387	gene:FBgn0261387	CG17528	2R:4815425-4824319	Control	HA	OK	24.7808	18.8728	-0.392918	-1.87016	0.00115	0.0215755	yes	down	FBgn0261387	dme:Dmel_CG17528
gene:FBgn0264294	gene:FBgn0264294	Cyt-b5	2R:7533505-7539696	Control	HA	OK	693.671	522.94	-0.407606	-1.81686	0.00115	0.0215755	yes	down	FBgn0264294	dme:Dmel_CG2140
gene:FBgn0022355	gene:FBgn0022355	Tsf1	X:18387083-18390344	Control	HA	OK	147.298	112.25	-0.392016	-1.82374	0.0012	0.0223633	yes	down	FBgn0022355	dme:Dmel_CG6186
gene:FBgn0038236	gene:FBgn0038236	Cyp313a1	3R:14513900-14558304	Control	HA	OK	18.2295	12.7131	-0.519953	-1.87405	0.0012	0.0223633	yes	down	FBgn0038236	dme:Dmel_CG3360
gene:FBgn0028894	gene:FBgn0028894	GMF	2L:16299942-16302954	Control	HA	OK	45.6807	33.2694	-0.457389	-1.92296	0.00125	0.0231405	yes	down	FBgn0028894	dme:Dmel_CG5869
gene:FBgn0031436	gene:FBgn0031436	ND-B17.2	2L:2579200-2580172	Control	HA	OK	689.818	530.887	-0.377811	-1.87618	0.0013	0.02379	yes	down	FBgn0031436	dme:Dmel_CG3214
gene:FBgn0035779	gene:FBgn0035779	CG8562	3L:7398284-7399912	Control	HA	OK	45.893	35.5326	-0.36913	-1.93163	0.0013	0.02379	yes	down	FBgn0035779	dme:Dmel_CG8562
gene:FBgn0038211	gene:FBgn0038211	CG9649	3R:14215458-14217882	Control	HA	OK	16.0917	11.9018	-0.43514	-1.88874	0.0013	0.02379	yes	down	FBgn0038211	dme:Dmel_CG9649
gene:FBgn0263830	gene:FBgn0263830	CG40486	X:22958855-22960091	Control	HA	OK	33.4284	24.4702	-0.450045	-1.90875	0.0013	0.02379	yes	down	FBgn0263830	dme:Dmel_CG40486
gene:FBgn0030259	gene:FBgn0030259	CG1545	X:11057544-11059619	Control	HA	OK	6.13324	3.33705	-0.878077	-2.01133	0.00135	0.0243852	yes	down	FBgn0030259	dme:Dmel_CG1545
gene:FBgn0031858	gene:FBgn0031858	CG17378	2L:6774040-6778444	Control	HA	OK	5.20118	3.59488	-0.532894	-1.85711	0.00135	0.0243852	yes	down	FBgn0031858	dme:Dmel_CG17378
gene:FBgn0033733	gene:FBgn0033733	CG8834	2R:12420474-12422535	Control	HA	OK	81.2285	63.2294	-0.36139	-1.8062	0.00135	0.0243852	yes	down	FBgn0033733	dme:Dmel_CG8834
gene:FBgn0034501	gene:FBgn0034501	CG13868	2R:20308776-20316917	Control	HA	OK	103.012	79.4374	-0.374919	-1.81328	0.00135	0.0243852	yes	down	FBgn0034501	dme:Dmel_CG13868
gene:FBgn0051928	gene:FBgn0051928	CG31928	2L:1492294-1493859	Control	HA	OK	11.9306	8.06514	-0.56489	-1.85054	0.00135	0.0243852	yes	down	FBgn0051928	dme:Dmel_CG31928
gene:FBgn0259732	gene:FBgn0259732	tal-3A	3R:13813108-13814648	Control	HA	OK	20.4	15.2779	-0.417124	-1.95512	0.00135	0.0243852	yes	down	FBgn0259732	dme:Dmel_CG42386
gene:FBgn0267339	gene:FBgn0267339	p38c	3R:24149019-24150203	Control	HA	OK	3.70162	2.21646	-0.739901	-1.86723	0.00135	0.0243852	yes	down	FBgn0267339	dme:Dmel_CG33338
gene:FBgn0010225	gene:FBgn0010225	Gel	3R:4235216-4242717	Control	HA	OK	63.6505	48.9824	-0.37791	-1.878	0.0014	0.0248461	yes	down	FBgn0010225	dme:Dmel_CG1106
gene:FBgn0031432	gene:FBgn0031432	Cyp309a1	2L:2562482-2564830	Control	HA	OK	3.44806	2.02166	-0.770243	-1.90063	0.0014	0.0248461	yes	down	FBgn0031432	dme:Dmel_CG9964
gene:FBgn0033978	gene:FBgn0033978	Cyp6a23	2R:14875828-14877654	Control	HA	OK	10.3253	7.50444	-0.460372	-1.82934	0.0014	0.0248461	yes	down	FBgn0033978	dme:Dmel_CG10242
gene:FBgn0036320	gene:FBgn0036320	CG10943	3L:12861716-12862920	Control	HA	OK	27.9283	20.3935	-0.453619	-2.07259	0.0014	0.0248461	yes	down	FBgn0036320	dme:Dmel_CG10943
gene:FBgn0036804	gene:FBgn0036804	Sgf11	3L:18681036-18681836	Control	HA	OK	52.965	39.244	-0.432566	-1.87777	0.0014	0.0248461	yes	down	FBgn0036804	dme:Dmel_CG13379
gene:FBgn0040394	gene:FBgn0040394	CG16903	X:2076965-2080405	Control	HA	OK	59.7455	45.3034	-0.39921	-1.8376	0.0014	0.0248461	yes	down	FBgn0040394	dme:Dmel_CG16903
gene:FBgn0067905	gene:FBgn0067905	IM14	2R:20870391-20870678	Control	HA	OK	440.048	322.334	-0.449103	-1.84893	0.0014	0.0248461	yes	down	FBgn0067905	dme:Dmel_CG33990
gene:FBgn0262854	gene:FBgn0262854	CG43218	3L:21226608-21266503	Control	HA	OK	11.117	6.72959	-0.724182	-1.92136	0.0014	0.0248461	yes	down	FBgn0262854	dme:Dmel_CG43218
gene:FBgn0034436	gene:FBgn0034436	CG11961	2R:19357531-19363124	Control	HA	OK	11.8448	9.08646	-0.382461	-1.79131	0.00145	0.0254903	yes	down	FBgn0034436	dme:Dmel_CG11961
gene:FBgn0261990	gene:FBgn0261990	CG42808	2R:13573617-13574257	Control	HA	OK	140.549	108.279	-0.376322	-1.84107	0.00145	0.0254903	yes	down	FBgn0261990	dme:Dmel_CG42808
gene:FBgn0036908	gene:FBgn0036908	TORIP	3L:19803737-19805080	Control	HA	OK	68.5164	52.8105	-0.375625	-1.81863	0.0015	0.0260818	yes	down	FBgn0036908	dme:Dmel_CG14103
gene:FBgn0038331	gene:FBgn0038331	Ccm3	3R:15370035-15374237	Control	HA	OK	53.6824	41.3403	-0.3769	-1.96799	0.0015	0.0260818	yes	down	FBgn0038331	dme:Dmel_CG5073
gene:FBgn0038761	gene:FBgn0038761	CG17190	3R:20011775-20013504	Control	HA	OK	9.16025	5.79156	-0.661434	-1.9064	0.0015	0.0260818	yes	down	FBgn0038761	dme:Dmel_CG17190
gene:FBgn0039774	gene:FBgn0039774	CDase	3R:30459520-30465736	Control	HA	OK	9.1709	6.75196	-0.441755	-1.81587	0.0015	0.0260818	yes	down	FBgn0039774	dme:Dmel_CG1471
gene:FBgn0051321	gene:FBgn0051321	CG31321	3R:14310361-14314412	Control	HA	OK	5.19772	3.57461	-0.540092	-1.84714	0.0015	0.0260818	yes	down	FBgn0051321	dme:Dmel_CG31321
gene:FBgn0065035	gene:FBgn0065035	AlkB	X:15858133-15859487	Control	HA	OK	13.918	10.0527	-0.469362	-1.92399	0.0015	0.0260818	yes	down	FBgn0065035	dme:Dmel_CG33250
gene:FBgn0010398	gene:FBgn0010398	Lrr47	2L:10517334-10519269	Control	HA	OK	13.4478	10.0111	-0.425775	-1.77179	0.00155	0.0267843	yes	down	FBgn0010398	dme:Dmel_CG6098
gene:FBgn0040211	gene:FBgn0040211	hgo	2L:11136392-11138565	Control	HA	OK	12.5931	9.25707	-0.444004	-1.78944	0.00155	0.0267843	yes	down	FBgn0040211	dme:Dmel_CG4779
gene:FBgn0264794	gene:FBgn0264794	CR44024	4:427330-431769	Control	HA	OK	2.02761	1.28396	-0.659181	-1.93016	0.00155	0.0267843	yes	down	FBgn0264794	dme:Dmel_CR44024
gene:FBgn0036318	gene:FBgn0036318	Wbp2	3L:12850164-12853169	Control	HA	OK	68.8447	53.3222	-0.36861	-1.82439	0.0016	0.0274359	yes	down	FBgn0036318	dme:Dmel_CG11009
gene:FBgn0037870	gene:FBgn0037870	CG18577	3R:11196091-11197285	Control	HA	OK	10.0459	6.35673	-0.660243	-1.86562	0.0016	0.0274359	yes	down	FBgn0037870	dme:Dmel_CG18577
gene:FBgn0038680	gene:FBgn0038680	Cyp12a5	3R:19132647-19134704	Control	HA	OK	16.9564	12.7063	-0.416291	-1.79513	0.0016	0.0274359	yes	down	FBgn0038680	dme:Dmel_CG11821
gene:FBgn0262904	gene:FBgn0262904	CR43259	3R:25902642-25906766	Control	HA	OK	2.74083	1.26432	-1.11625	-1.99282	0.00165	0.0282499	yes	down	FBgn0262904	dme:Dmel_CR43259
gene:FBgn0032373	gene:FBgn0032373	Vha100-5	2L:11738947-11744524	Control	HA	OK	22.0731	17.061	-0.371587	-1.7875	0.0017	0.0289727	yes	down	FBgn0032373	dme:Dmel_CG12602
gene:FBgn0263081	gene:FBgn0263081	CG43349	2L:1200204-1200663	Control	HA	OK	172.871	123.5	-0.485177	-1.90677	0.0017	0.0289727	yes	down	FBgn0263081	dme:Dmel_CG43349
gene:FBgn0035600	gene:FBgn0035600	Cyt-c1	3L:5360210-5362798	Control	HA	OK	698.978	530.513	-0.397859	-1.7912	0.00175	0.0295094	yes	down	FBgn0035600	dme:Dmel_CG4769
gene:FBgn0040102	gene:FBgn0040102	lectin-24Db	2L:4188122-4189284	Control	HA	OK	7.51917	4.83198	-0.63796	-1.84284	0.00175	0.0295094	yes	down	FBgn0040102	dme:Dmel_CG2958
gene:FBgn0260942	gene:FBgn0260942	bond	3R:22550031-22556494	Control	HA	OK	39.8731	30.9989	-0.363198	-1.7909	0.00175	0.0295094	yes	down	FBgn0260942	dme:Dmel_CG6921
gene:FBgn0028394	gene:FBgn0028394	CG17834	2L:8529140-8541439	Control	HA	OK	26.9949	20.1134	-0.424526	-1.84416	0.0018	0.0299009	yes	down	FBgn0028394	dme:Dmel_CG17834
gene:FBgn0030583	gene:FBgn0030583	CG14410	X:14836724-14837330	Control	HA	OK	8.56443	3.98773	-1.10279	-2.22815	0.0018	0.0299009	yes	down	FBgn0030583	dme:Dmel_CG14410
gene:FBgn0030747	gene:FBgn0030747	CG4301	X:16405508-16414651	Control	HA	OK	4.06528	2.94273	-0.4662	-1.87369	0.0018	0.0299009	yes	down	FBgn0030747	dme:Dmel_CG4301
gene:FBgn0036992	gene:FBgn0036992	CG11796	3L:20436249-20439921	Control	HA	OK	107.047	80.1218	-0.417976	-1.79997	0.0018	0.0299009	yes	down	FBgn0036992	dme:Dmel_CG11796
gene:FBgn0038652	gene:FBgn0038652	CG7720	3R:18759235-18795169	Control	HA	OK	39.6656	30.7962	-0.365136	-1.80398	0.0018	0.0299009	yes	down	FBgn0038652	dme:Dmel_CG7720
gene:FBgn0039670	gene:FBgn0039670	CG7567	3R:29587236-29588104	Control	HA	OK	34.4102	25.5729	-0.428221	-1.82148	0.0018	0.0299009	yes	down	FBgn0039670	dme:Dmel_CG7567
gene:FBgn0058298	gene:FBgn0058298	CG40298	3L:23726828-23727989	Control	HA	OK	8.15102	5.53042	-0.55959	-1.94517	0.0018	0.0299009	yes	down	FBgn0058298	dme:Dmel_CG40298
gene:FBgn0267668	gene:FBgn0267668	CR46006	3L:10323500-10367450	Control	HA	OK	1.71994	1.092	-0.655376	-1.88465	0.0018	0.0299009	yes	down	FBgn0267668
gene:FBgn0027539	gene:FBgn0027539	lili	3R:24805444-24814012	Control	HA	OK	19.1529	14.842	-0.367873	-1.79532	0.00185	0.0305496	yes	down	FBgn0027539	dme:Dmel_CG5807
gene:FBgn0034399	gene:FBgn0034399	CG15083	2R:18835262-18846619	Control	HA	OK	109.865	75.1323	-0.548222	-1.83555	0.00185	0.0305496	yes	down	FBgn0034399	dme:Dmel_CG15083
gene:FBgn0040653	gene:FBgn0040653	IM4	2R:20868495-20869321	Control	HA	OK	310.643	227.909	-0.446798	-1.98606	0.0019	0.0310993	yes	down	FBgn0040653	dme:Dmel_CG15231
gene:FBgn0030011	gene:FBgn0030011	Gbeta5	X:8150730-8152275	Control	HA	OK	7.80311	5.41202	-0.527882	-1.89856	0.00195	0.0316854	yes	down	FBgn0030011	dme:Dmel_CG10763
gene:FBgn0063493	gene:FBgn0063493	GstE7	2R:18406923-18407688	Control	HA	OK	90.1505	69.9477	-0.366059	-1.74976	0.00195	0.0316854	yes	down	FBgn0063493	dme:Dmel_CG17531
gene:FBgn0085271	gene:FBgn0085271	CG34242	3L:12533995-12534403	Control	HA	OK	173.896	130.634	-0.412701	-1.82618	0.00195	0.0316854	yes	down	FBgn0085271	dme:Dmel_CG34242
gene:FBgn0028936	gene:FBgn0028936	NimB5	2L:13970176-13972947	Control	HA	OK	10.0947	6.64995	-0.602178	-1.84259	0.002	0.0323097	yes	down	FBgn0028936	dme:Dmel_CG16873
gene:FBgn0037996	gene:FBgn0037996	CG4830	3R:12208158-12210360	Control	HA	OK	14.1873	10.6828	-0.40931	-1.76001	0.002	0.0323097	yes	down	FBgn0037996	dme:Dmel_CG4830
gene:FBgn0052282	gene:FBgn0052282	Drsl4	3L:3315619-3315942	Control	HA	OK	241.08	185.426	-0.37867	-1.92429	0.002	0.0323097	yes	down	FBgn0052282	dme:Dmel_CG32282
gene:FBgn0000557	gene:FBgn0000557	eEF1alpha2	3R:31738467-31743306	Control	HA	OK	70.6481	55.2173	-0.355532	-1.76231	0.00205	0.0328795	yes	down	FBgn0000557	dme:Dmel_CG1873
gene:FBgn0039085	gene:FBgn0039085	CG10170	3R:23532944-23534767	Control	HA	OK	3.43362	2.16511	-0.665288	-1.86115	0.00205	0.0328795	yes	down	FBgn0039085	dme:Dmel_CG10170
gene:FBgn0039485	gene:FBgn0039485	CG17189	3R:27101405-27102917	Control	HA	OK	14.3429	9.9247	-0.531237	-1.82109	0.00205	0.0328795	yes	down	FBgn0039485	dme:Dmel_CG17189
gene:FBgn0040069	gene:FBgn0040069	vanin-like	X:6200187-6202559	Control	HA	OK	33.3766	26.1257	-0.353364	-1.72226	0.00205	0.0328795	yes	down	FBgn0040069	dme:Dmel_CG32754
gene:FBgn0034726	gene:FBgn0034726	Mes4	2R:22411788-22415518	Control	HA	OK	46.3643	31.9152	-0.538772	-1.81998	0.0021	0.0336331	yes	down	FBgn0034726	dme:Dmel_CG11301
gene:FBgn0038763	gene:FBgn0038763	PIG-L	3R:20018268-20021338	Control	HA	OK	31.7174	24.448	-0.375559	-1.76601	0.00215	0.0342374	yes	down	FBgn0038763	dme:Dmel_CG4433
gene:FBgn0262108	gene:FBgn0262108	CR42861	X:13744927-13745476	Control	HA	OK	95.8223	68.7849	-0.478268	-1.91662	0.00215	0.0342374	yes	down	FBgn0262108	dme:Dmel_CR42861
gene:FBgn0033871	gene:FBgn0033871	CG13339	2R:13824857-13825572	Control	HA	OK	44.8067	33.3578	-0.42569	-1.79498	0.0022	0.0348349	yes	down	FBgn0033871	dme:Dmel_CG13339
gene:FBgn0039337	gene:FBgn0039337	MED28	3R:25477002-25477745	Control	HA	OK	35.2666	26.3722	-0.419282	-1.77664	0.0022	0.0348349	yes	down	FBgn0039337	dme:Dmel_CG5121
gene:FBgn0086604	gene:FBgn0086604	CG12484	2R:20424337-20478951	Control	HA	OK	2.76315	1.87809	-0.557044	-1.81387	0.0022	0.0348349	yes	down	FBgn0086604	dme:Dmel_CG12484
gene:FBgn0036015	gene:FBgn0036015	CG3088	3L:9597170-9614001	Control	HA	OK	158.98	124.455	-0.353223	-1.76197	0.00225	0.0354756	yes	down	FBgn0036015	dme:Dmel_CG3088
gene:FBgn0263406	gene:FBgn0263406	CR43452	3R:20678182-20679079	Control	HA	OK	10.3872	7.11286	-0.546311	-1.7892	0.00225	0.0354756	yes	down	FBgn0263406	dme:Dmel_CR43452
gene:FBgn0024754	gene:FBgn0024754	Flo1	2R:15566270-15573991	Control	HA	OK	40.6366	28.3627	-0.518786	-1.79471	0.0023	0.0361618	yes	down	FBgn0024754	dme:Dmel_CG8200
gene:FBgn0030237	gene:FBgn0030237	CG15209	X:10832751-10847092	Control	HA	OK	178.053	122.762	-0.536444	-1.78489	0.0023	0.0361618	yes	down	FBgn0030237	dme:Dmel_CG15209
gene:FBgn0000406	gene:FBgn0000406	Cyt-b5-r	2L:16788773-16790721	Control	HA	OK	82.6508	65.0078	-0.346416	-1.72976	0.00235	0.0366896	yes	down	FBgn0000406	dme:Dmel_CG13279
gene:FBgn0014019	gene:FBgn0014019	Rh5	2L:12008152-12009832	Control	HA	OK	26.9444	20.729	-0.378334	-1.72836	0.00235	0.0366896	yes	down	FBgn0014019	dme:Dmel_CG5279
gene:FBgn0031141	gene:FBgn0031141	CG1304	X:20964526-20965419	Control	HA	OK	60.252	46.8159	-0.364012	-1.76797	0.00235	0.0366896	yes	down	FBgn0031141	dme:Dmel_CG1304
gene:FBgn0052446	gene:FBgn0052446	Atox1	3L:21640994-21642599	Control	HA	OK	110.879	86.9429	-0.350841	-1.7658	0.00235	0.0366896	yes	down	FBgn0052446	dme:Dmel_CG32446
gene:FBgn0267498	gene:FBgn0267498	18SrRNA:CR45838	rDNA:55103-59294	Control	HA	OK	127.169	96.121	-0.403827	-1.77955	0.00235	0.0366896	yes	down	FBgn0267498
gene:FBgn0004623	gene:FBgn0004623	Gbeta76C	3L:19687636-19689992	Control	HA	OK	150.186	118.037	-0.347516	-1.73591	0.0024	0.0373657	yes	down	FBgn0004623	dme:Dmel_CG8770
gene:FBgn0034058	gene:FBgn0034058	Pex11	2R:15991366-15992375	Control	HA	OK	47.1804	35.878	-0.39509	-1.82869	0.0024	0.0373657	yes	down	FBgn0034058	dme:Dmel_CG8315
gene:FBgn0003943	gene:FBgn0003943	Ubi-p63E	3L:3899258-3903184	Control	HA	OK	460.7	351.025	-0.392254	-1.79337	0.00245	0.0379325	yes	down	FBgn0003943	dme:Dmel_CG5271
gene:FBgn0027784	gene:FBgn0027784	Prp18	3R:19028930-19031271	Control	HA	OK	31.1714	21.142	-0.560109	-1.80505	0.00245	0.0379325	yes	down	FBgn0027784	dme:Dmel_CG6011
gene:FBgn0033221	gene:FBgn0033221	CG12825	2R:7789205-7789988	Control	HA	OK	76.8681	58.7185	-0.38857	-1.77558	0.00245	0.0379325	yes	down	FBgn0033221	dme:Dmel_CG12825
gene:FBgn0052647	gene:FBgn0052647	CG32647	X:12765265-12784958	Control	HA	OK	8.6956	6.42647	-0.436257	-1.83013	0.00245	0.0379325	yes	down	FBgn0052647	dme:Dmel_CG32647
gene:FBgn0036335	gene:FBgn0036335	mRpL20	3L:13017148-13017867	Control	HA	OK	93.0631	71.2729	-0.384856	-1.76922	0.0025	0.0384401	yes	down	FBgn0036335	dme:Dmel_CG11258
gene:FBgn0243513	gene:FBgn0243513	cnir	2L:3038825-3039812	Control	HA	OK	13.5243	9.61764	-0.491801	-1.7483	0.0025	0.0384401	yes	down	FBgn0243513	dme:Dmel_CG17262
gene:FBgn0032857	gene:FBgn0032857	CG10947	2L:20385292-20414800	Control	HA	OK	11.1902	8.61472	-0.377358	-1.75509	0.00255	0.0390475	yes	down	FBgn0032857	dme:Dmel_CG10947
gene:FBgn0036105	gene:FBgn0036105	Blos4	3L:10879084-10880188	Control	HA	OK	16.4531	11.2722	-0.545584	-1.77091	0.00255	0.0390475	yes	down	FBgn0036105	dme:Dmel_CG14149
gene:FBgn0053129	gene:FBgn0053129	CG33129	2L:10964904-10970275	Control	HA	OK	301.008	232.048	-0.37538	-1.75876	0.00255	0.0390475	yes	down	FBgn0053129	dme:Dmel_CG33129
gene:FBgn0031428	gene:FBgn0031428	CG9886	2L:2420829-2424647	Control	HA	OK	9.33299	6.85914	-0.444311	-1.76422	0.0026	0.0395959	yes	down	FBgn0031428	dme:Dmel_CG9886
gene:FBgn0034471	gene:FBgn0034471	Obp56e	2R:19712094-19712932	Control	HA	OK	208.386	141.378	-0.559694	-1.76096	0.0026	0.0395959	yes	down	FBgn0034471	dme:Dmel_CG8462
gene:FBgn0051953	gene:FBgn0051953	CR31953	2L:3162514-3163289	Control	HA	OK	56.9868	43.6258	-0.385446	-1.72773	0.0026	0.0395959	yes	down	FBgn0051953
gene:FBgn0035282	gene:FBgn0035282	CNMa	3L:1850914-1855591	Control	HA	OK	2.76241	1.69498	-0.704656	-1.70061	0.00265	0.0401383	yes	down	FBgn0035282	dme:Dmel_CG13936
gene:FBgn0036696	gene:FBgn0036696	CG14057	3L:17042796-17045038	Control	HA	OK	67.2551	45.4647	-0.564898	-1.78675	0.00265	0.0401383	yes	down	FBgn0036696	dme:Dmel_CG14057
gene:FBgn0036945	gene:FBgn0036945	Ssk	3L:20149613-20198317	Control	HA	OK	62.3601	43.3659	-0.524064	-1.78652	0.00265	0.0401383	yes	down	FBgn0036945	dme:Dmel_CG6981
gene:FBgn0014396	gene:FBgn0014396	tim	2L:3493985-3508119	Control	HA	OK	10.1609	7.88858	-0.365189	-1.71901	0.0027	0.0405109	yes	down	FBgn0014396	dme:Dmel_CG3234
gene:FBgn0034602	gene:FBgn0034602	Lapsyn	2R:21193570-21199431	Control	HA	OK	14.2197	10.6682	-0.41457	-1.75742	0.0027	0.0405109	yes	down	FBgn0034602	dme:Dmel_CG15658
gene:FBgn0036745	gene:FBgn0036745	CG7484	3L:17654616-17655645	Control	HA	OK	65.9525	50.285	-0.3913	-1.79557	0.0027	0.0405109	yes	down	FBgn0036745	dme:Dmel_CG7484
gene:FBgn0034662	gene:FBgn0034662	CG13492	2R:21820661-21831409	Control	HA	OK	11.5755	9.1119	-0.345245	-1.73039	0.00275	0.0408765	yes	down	FBgn0034662	dme:Dmel_CG13492
gene:FBgn0034783	gene:FBgn0034783	CG9825	2R:22837360-22839291	Control	HA	OK	4.20782	2.78687	-0.594427	-1.75349	0.00275	0.0408765	yes	down	FBgn0034783	dme:Dmel_CG9825
gene:FBgn0050392	gene:FBgn0050392	CG30392	2R:21290913-21292181	Control	HA	OK	65.1653	51.2612	-0.346238	-1.7229	0.00275	0.0408765	yes	down	FBgn0050392	dme:Dmel_CG30392
gene:FBgn0052196	gene:FBgn0052196	CG32196	3L:18459463-18461024	Control	HA	OK	14.593	9.99777	-0.545596	-1.77526	0.00275	0.0408765	yes	down	FBgn0052196	dme:Dmel_CG32196
gene:FBgn0002868	gene:FBgn0002868	MtnA	3R:9783406-9784370	Control	HA	OK	7336.38	5492.84	-0.417516	-1.7996	0.0028	0.0413992	yes	down	FBgn0002868	dme:Dmel_CG9470
gene:FBgn0029994	gene:FBgn0029994	CG2254	X:8078349-8081605	Control	HA	OK	94.3778	74.2515	-0.346028	-1.74163	0.0028	0.0413992	yes	down	FBgn0029994	dme:Dmel_CG2254
gene:FBgn0038029	gene:FBgn0038029	GstD11	3R:12383335-12385624	Control	HA	OK	2.88709	1.44969	-0.993869	-1.8282	0.0028	0.0413992	yes	down	FBgn0038029	dme:Dmel_CG17639
gene:FBgn0051269	gene:FBgn0051269	CG31269	3R:17126983-17128201	Control	HA	OK	7.28363	4.63856	-0.650979	-1.8449	0.0028	0.0413992	yes	down	FBgn0051269	dme:Dmel_CG31269
gene:FBgn0030346	gene:FBgn0030346	CG11802	X:11871298-11872779	Control	HA	OK	27.2116	20.7762	-0.389291	-1.70382	0.00285	0.0419164	yes	down	FBgn0030346	dme:Dmel_CG11802
gene:FBgn0032251	gene:FBgn0032251	Nse4	2L:10439439-10441047	Control	HA	OK	15.1462	11.0289	-0.457666	-1.78464	0.00285	0.0419164	yes	down	FBgn0032251	dme:Dmel_CG13142
gene:FBgn0053460	gene:FBgn0053460	CG33460	2R:15694091-15695232	Control	HA	OK	2.96909	1.60281	-0.88942	-1.84786	0.00285	0.0419164	yes	down	FBgn0053460	dme:Dmel_CG33460
gene:FBgn0025676	gene:FBgn0025676	CkIIalpha-i3	3L:708600-710607	Control	HA	OK	19.502	14.344	-0.443176	-1.77267	0.0029	0.0423726	yes	down	FBgn0025676	dme:Dmel_CG3217
gene:FBgn0030291	gene:FBgn0030291	CG1738	X:11349048-11349847	Control	HA	OK	53.2433	40.1094	-0.408657	-1.7544	0.0029	0.0423726	yes	down	FBgn0030291	dme:Dmel_CG1738
gene:FBgn0035290	gene:FBgn0035290	dsb	3L:1893407-1910197	Control	HA	OK	8.06639	6.01171	-0.424148	-1.72409	0.0029	0.0423726	yes	down	FBgn0035290	dme:Dmel_CG1887
gene:FBgn0039690	gene:FBgn0039690	CG1969	3R:29738274-29741952	Control	HA	OK	32.9735	25.3555	-0.379006	-1.69276	0.0029	0.0423726	yes	down	FBgn0039690	dme:Dmel_CG1969
gene:FBgn0043841	gene:FBgn0043841	vir-1	2L:12403269-12423439	Control	HA	OK	433.262	338.539	-0.355918	-1.73737	0.0029	0.0423726	yes	down	FBgn0043841	dme:Dmel_CG31764
gene:FBgn0003275	gene:FBgn0003275	RpII18	3R:5371794-5372397	Control	HA	OK	314.498	245.549	-0.357039	-1.78831	0.00295	0.0427673	yes	down	FBgn0003275	dme:Dmel_CG1163
gene:FBgn0022361	gene:FBgn0022361	Pur-alpha	4:558015-567257	Control	HA	OK	33.212	24.8462	-0.418679	-1.80116	0.00295	0.0427673	yes	down	FBgn0022361	dme:Dmel_CG1507
gene:FBgn0039801	gene:FBgn0039801	Npc2h	3R:30745478-30746290	Control	HA	OK	70.8496	53.8008	-0.397134	-1.77226	0.00295	0.0427673	yes	down	FBgn0039801	dme:Dmel_CG11315
gene:FBgn0261792	gene:FBgn0261792	snRNP-U1-C	3R:18982963-18983650	Control	HA	OK	95.3043	73.5276	-0.374256	-1.73571	0.00295	0.0427673	yes	down	FBgn0261792	dme:Dmel_CG5454
gene:FBgn0005670	gene:FBgn0005670	Cyp4d1	X:2159144-2162180	Control	HA	OK	8.78526	5.96771	-0.557907	-1.84604	0.003	0.0433795	yes	down	FBgn0005670	dme:Dmel_CG3656
gene:FBgn0010213	gene:FBgn0010213	Sod2	2R:16772784-16773915	Control	HA	OK	405.898	319.106	-0.347083	-1.70614	0.00305	0.0438187	yes	down	FBgn0010213	dme:Dmel_CG8905
gene:FBgn0031417	gene:FBgn0031417	CG3597	2L:2370151-2371524	Control	HA	OK	38.1346	29.5049	-0.370147	-1.76538	0.00305	0.0438187	yes	down	FBgn0031417	dme:Dmel_CG3597
gene:FBgn0032202	gene:FBgn0032202	REPTOR-BP	2L:10264124-10265229	Control	HA	OK	146.033	113.32	-0.365895	-1.8306	0.00305	0.0438187	yes	down	FBgn0032202	dme:Dmel_CG18619
gene:FBgn0039324	gene:FBgn0039324	CG10553	3R:25316460-25318111	Control	HA	OK	33.0891	25.8068	-0.358604	-1.70374	0.00305	0.0438187	yes	down	FBgn0039324	dme:Dmel_CG10553
gene:FBgn0024986	gene:FBgn0024986	CG3719	X:1375535-1380480	Control	HA	OK	208.594	138.801	-0.587676	-1.71035	0.0031	0.0441394	yes	down	FBgn0024986	dme:Dmel_CG3719
gene:FBgn0029508	gene:FBgn0029508	Tsp42Ea	2R:6992675-7004259	Control	HA	OK	94.4606	68.4374	-0.464929	-1.69678	0.0031	0.0441394	yes	down	FBgn0029508	dme:Dmel_CG18817
gene:FBgn0040077	gene:FBgn0040077	primo-1	3R:13710016-13711835	Control	HA	OK	94.5169	73.1642	-0.369435	-1.70743	0.0031	0.0441394	yes	down	FBgn0040077	dme:Dmel_CG33748
gene:FBgn0052313	gene:FBgn0052313	CG32313	3L:1544827-1545743	Control	HA	OK	2.14413	0.938818	-1.19147	-1.76865	0.0031	0.0441394	yes	down	FBgn0052313	dme:Dmel_CG32313
gene:FBgn0039924	gene:FBgn0039924	PIP4K	4:1185767-1196848	Control	HA	OK	86.4347	55.3828	-0.642171	-1.8283	0.00315	0.0446804	yes	down	FBgn0039924	dme:Dmel_CG17471
gene:FBgn0032131	gene:FBgn0032131	CG3841	2L:9589475-9591783	Control	HA	OK	8.51118	6.44302	-0.401622	-1.65493	0.0032	0.0451601	yes	down	FBgn0032131	dme:Dmel_CG3841
gene:FBgn0029835	gene:FBgn0029835	CG5921	X:6050827-6065646	Control	HA	OK	4.19127	3.06404	-0.451951	-1.69566	0.00325	0.0455776	yes	down	FBgn0029835	dme:Dmel_CG5921
gene:FBgn0034165	gene:FBgn0034165	CG6435	2R:16873771-16895652	Control	HA	OK	10.089	5.90487	-0.772805	-1.73	0.00325	0.0455776	yes	down	FBgn0034165	dme:Dmel_CG6435
gene:FBgn0037637	gene:FBgn0037637	IscU	3R:8822848-8824177	Control	HA	OK	279.573	221.983	-0.332776	-1.65556	0.0033	0.0458753	yes	down	FBgn0037637	dme:Dmel_CG9836
gene:FBgn0038654	gene:FBgn0038654	CG14298	3R:18875527-18877204	Control	HA	OK	21.3147	14.7847	-0.527741	-1.70246	0.0033	0.0458753	yes	down	FBgn0038654	dme:Dmel_CG14298
gene:FBgn0265177	gene:FBgn0265177	CG44242	2R:16196383-16196928	Control	HA	OK	240.293	189.668	-0.34132	-1.72014	0.0033	0.0458753	yes	down	FBgn0265177	dme:Dmel_CG44242
gene:FBgn0020545	gene:FBgn0020545	kraken	2L:852767-854539	Control	HA	OK	97.9115	77.456	-0.338101	-1.67975	0.00335	0.0463971	yes	down	FBgn0020545	dme:Dmel_CG3943
gene:FBgn0036872	gene:FBgn0036872	CG12519	3L:19472490-19473145	Control	HA	OK	9.99249	5.86517	-0.768672	-1.77327	0.00335	0.0463971	yes	down	FBgn0036872	dme:Dmel_CG12519
gene:FBgn0053265	gene:FBgn0053265	Muc68E	3L:11967342-11972979	Control	HA	OK	2.81505	2.02914	-0.472291	-1.85533	0.00335	0.0463971	yes	down	FBgn0053265	dme:Dmel_CG33265
gene:FBgn0031937	gene:FBgn0031937	CG13795	2L:7723044-7726298	Control	HA	OK	1.79739	1.16029	-0.631418	-1.67277	0.00345	0.047429	yes	down	FBgn0031937	dme:Dmel_CG13795
gene:FBgn0036266	gene:FBgn0036266	CG5626	3L:12204122-12206022	Control	HA	OK	14.587	10.9847	-0.409195	-1.73337	0.00345	0.047429	yes	down	FBgn0036266	dme:Dmel_CG5626
gene:FBgn0261822	gene:FBgn0261822	Bsg	2L:8083419-8116531	Control	HA	OK	166.107	128.491	-0.370445	-1.75921	0.00345	0.047429	yes	down	FBgn0261822	dme:Dmel_CG31605
gene:FBgn0014023	gene:FBgn0014023	mRpL47	3R:9513326-9515908	Control	HA	OK	102.689	75.9496	-0.43517	-1.69679	0.0035	0.047647	yes	down	FBgn0014023	dme:Dmel_CG9378
gene:FBgn0030323	gene:FBgn0030323	CG2371	X:11677343-11678589	Control	HA	OK	29.8613	23.0866	-0.371222	-1.69968	0.0035	0.047647	yes	down	FBgn0030323	dme:Dmel_CG2371
gene:FBgn0035626	gene:FBgn0035626	lin-28	3L:5654680-5657384	Control	HA	OK	0.906049	0.219801	-2.04339	-2.08402	0.0035	0.047647	yes	down	FBgn0035626	dme:Dmel_CG17334
gene:FBgn0050000	gene:FBgn0050000	GstT1	2R:9605987-9607184	Control	HA	OK	52.262	40.7504	-0.35895	-1.71278	0.0035	0.047647	yes	down	FBgn0050000	dme:Dmel_CG30000
gene:FBgn0085612	gene:FBgn0085612	CR41320	3L:26165234-26178793	Control	HA	OK	17.6427	12.0994	-0.544127	-1.80647	0.0035	0.047647	yes	down	FBgn0085612
gene:FBgn0038799	gene:FBgn0038799	MFS9	3R:20507391-20512468	Control	HA	OK	4.95625	3.45586	-0.520204	-1.66068	0.00355	0.0481515	yes	down	FBgn0038799	dme:Dmel_CG4288
gene:FBgn0019643	gene:FBgn0019643	Dat	2R:24139562-24159312	Control	HA	OK	52.8206	37.2741	-0.502928	-1.72634	0.0036	0.0485348	yes	down	FBgn0019643	dme:Dmel_CG3318
gene:FBgn0026088	gene:FBgn0026088	CG14818	X:1877316-1879774	Control	HA	OK	256.785	185.489	-0.469225	-1.70663	0.0036	0.0485348	yes	down	FBgn0026088	dme:Dmel_CG14818
gene:FBgn0030369	gene:FBgn0030369	Cyp318a1	X:12032631-12035283	Control	HA	OK	3.79222	2.45386	-0.627986	-1.69497	0.0036	0.0485348	yes	down	FBgn0030369	dme:Dmel_CG1786
gene:FBgn0035877	gene:FBgn0035877	CG7083	3L:8340313-8344404	Control	HA	OK	24.0272	18.1948	-0.401142	-1.65445	0.0036	0.0485348	yes	down	FBgn0035877	dme:Dmel_CG7083
gene:FBgn0033691	gene:FBgn0033691	CG8860	2R:12179013-12179902	Control	HA	OK	411.452	310.361	-0.406777	-1.71451	0.00365	0.0490312	yes	down	FBgn0033691	dme:Dmel_CG8860
gene:FBgn0032782	gene:FBgn0032782	Rab9	2L:19432573-19435841	Control	HA	OK	28.9628	22.4914	-0.364831	-1.6995	0.0037	0.0494056	yes	down	FBgn0032782	dme:Dmel_CG9994
gene:FBgn0036659	gene:FBgn0036659	CG9701	3L:16733545-16739364	Control	HA	OK	10.1872	7.63346	-0.416349	-1.68498	0.0037	0.0494056	yes	down	FBgn0036659	dme:Dmel_CG9701
gene:FBgn0030484	gene:FBgn0030484	GstT4	X:13404748-13409323	Control	HA	OK	120.054	95.6767	-0.327438	-1.64842	0.00375	0.0497756	yes	down	FBgn0030484	dme:Dmel_CG1681
gene:FBgn0051370	gene:FBgn0051370	CG31370	3R:25302463-25303986	Control	HA	OK	4.82625	3.19531	-0.594949	-1.7251	0.00375	0.0497756	yes	down	FBgn0051370	dme:Dmel_CG31370
gene:FBgn0262962	gene:FBgn0262962	CG43273	3R:24830300-24830973	Control	HA	OK	72.3274	54.0979	-0.418969	-1.7459	0.00375	0.0497756	yes	down	FBgn0262962	dme:Dmel_CG43273
gene:FBgn0000639	gene:FBgn0000639	Fbp1	3L:14094588-14098053	Control	HA	OK	6.75032	14.9551	1.14761	4.99778	5e-05	0.00173879	yes	up	FBgn0000639	dme:Dmel_CG17285
gene:FBgn0002562	gene:FBgn0002562	Lsp1alpha	X:12490290-12492982	Control	HA	OK	1.98069	4.57604	1.2081	3.67231	5e-05	0.00173879	yes	up	FBgn0002562	dme:Dmel_CG2559
gene:FBgn0002563	gene:FBgn0002563	Lsp1beta	2L:898499-901316	Control	HA	OK	7.11543	10.7869	0.600252	2.40248	5e-05	0.00173879	yes	up	FBgn0002563	dme:Dmel_CG4178
gene:FBgn0002780	gene:FBgn0002780	mod	3R:32052059-32054974	Control	HA	OK	199.582	280.77	0.492408	2.36028	5e-05	0.00173879	yes	up	FBgn0002780	dme:Dmel_CG2050
gene:FBgn0003189	gene:FBgn0003189	r	X:16655358-16668712	Control	HA	OK	9.88448	13.9738	0.499492	2.35216	5e-05	0.00173879	yes	up	FBgn0003189	dme:Dmel_CG18572
gene:FBgn0011824	gene:FBgn0011824	CG4038	2R:21092221-21101453	Control	HA	OK	50.1158	80.6041	0.685588	3.12586	5e-05	0.00173879	yes	up	FBgn0011824	dme:Dmel_CG4038
gene:FBgn0013681	gene:FBgn0013681	mt:ND3	mitochondrion_genome:5607-5961	Control	HA	OK	112.366	211.498	0.912438	4.72053	5e-05	0.00173879	yes	up	FBgn0013681	dme:Dmel_CG34076
gene:FBgn0019938	gene:FBgn0019938	RpI1	2R:14591202-14601216	Control	HA	OK	8.9852	12.6489	0.493392	2.40458	5e-05	0.00173879	yes	up	FBgn0019938	dme:Dmel_CG10122
gene:FBgn0023515	gene:FBgn0023515	CG14814	X:1862008-1865835	Control	HA	OK	18.5528	26.5096	0.514879	2.46598	5e-05	0.00173879	yes	up	FBgn0023515	dme:Dmel_CG14814
gene:FBgn0032945	gene:FBgn0032945	CG8665	2L:21371226-21377995	Control	HA	OK	3.75183	6.22944	0.731507	3.06226	5e-05	0.00173879	yes	up	FBgn0032945	dme:Dmel_CG8665
gene:FBgn0033725	gene:FBgn0033725	Cpr49Ac	2R:12386665-12390057	Control	HA	OK	0.825804	2.18312	1.40252	2.4453	5e-05	0.00173879	yes	up	FBgn0033725	dme:Dmel_CG8502
gene:FBgn0034098	gene:FBgn0034098	krimp	2R:16238102-16240722	Control	HA	OK	9.77486	13.7459	0.491855	2.24221	5e-05	0.00173879	yes	up	FBgn0034098	dme:Dmel_CG15707
gene:FBgn0035176	gene:FBgn0035176	CG13905	3L:902897-903810	Control	HA	OK	10.2493	19.2654	0.910485	3.26374	5e-05	0.00173879	yes	up	FBgn0035176	dme:Dmel_CG13905
gene:FBgn0036686	gene:FBgn0036686	CG7728	3L:17016535-17020270	Control	HA	OK	13.2987	18.4762	0.47438	2.29508	5e-05	0.00173879	yes	up	FBgn0036686	dme:Dmel_CG7728
gene:FBgn0037580	gene:FBgn0037580	DppIII	3R:8344399-8347465	Control	HA	OK	78.1646	106.162	0.441685	2.20101	5e-05	0.00173879	yes	up	FBgn0037580	dme:Dmel_CG7415
gene:FBgn0038191	gene:FBgn0038191	CG9925	3R:13960711-13964174	Control	HA	OK	12.0702	17.3582	0.524167	2.52788	5e-05	0.00173879	yes	up	FBgn0038191	dme:Dmel_CG9925
gene:FBgn0040075	gene:FBgn0040075	rept	3L:19255339-19257111	Control	HA	OK	32.7857	44.7309	0.448204	2.18538	5e-05	0.00173879	yes	up	FBgn0040075	dme:Dmel_CG9750
gene:FBgn0086451	gene:FBgn0086451	l(2)k09022	2L:6854141-6860849	Control	HA	OK	6.72023	9.18951	0.451478	2.19091	5e-05	0.00173879	yes	up	FBgn0086451	dme:Dmel_CG10805
gene:FBgn0002564	gene:FBgn0002564	Lsp1gamma	3L:66429-68995	Control	HA	OK	7.6275	11.8414	0.634558	2.67051	0.0001	0.00315339	yes	up	FBgn0002564	dme:Dmel_CG6821
gene:FBgn0015625	gene:FBgn0015625	CycB3	3R:24867933-24870816	Control	HA	OK	24.8768	35.2656	0.503459	2.38612	0.0001	0.00315339	yes	up	FBgn0015625	dme:Dmel_CG5814
gene:FBgn0028537	gene:FBgn0028537	CG31775	2L:14737089-14737769	Control	HA	OK	25.6209	47.7199	0.897271	2.61831	0.0001	0.00315339	yes	up	FBgn0028537	dme:Dmel_CG31775
gene:FBgn0033661	gene:FBgn0033661	CG13185	2R:11867875-11885585	Control	HA	OK	2.67304	3.66049	0.453556	2.21203	0.0001	0.00315339	yes	up	FBgn0033661	dme:Dmel_CG13185
gene:FBgn0033902	gene:FBgn0033902	eIF3m	2R:14163065-14164825	Control	HA	OK	117.18	164.841	0.492347	2.47605	0.0001	0.00315339	yes	up	FBgn0033902	dme:Dmel_CG8309
gene:FBgn0034734	gene:FBgn0034734	CG4554	2R:22483302-22492033	Control	HA	OK	3.23499	4.65281	0.524341	2.42594	0.0001	0.00315339	yes	up	FBgn0034734	dme:Dmel_CG4554
gene:FBgn0034837	gene:FBgn0034837	RpL22-like	2R:23246609-23247893	Control	HA	OK	3.35926	6.3546	0.919657	2.31376	0.0001	0.00315339	yes	up	FBgn0034837	dme:Dmel_CG9871
gene:FBgn0036881	gene:FBgn0036881	Cpr76Bd	3L:19532742-19538289	Control	HA	OK	2.7419	4.15304	0.598994	2.31114	0.0001	0.00315339	yes	up	FBgn0036881	dme:Dmel_CG9299
gene:FBgn0037549	gene:FBgn0037549	CG7878	3R:8122724-8125273	Control	HA	OK	22.3018	31.0393	0.476939	2.35343	0.0001	0.00315339	yes	up	FBgn0037549	dme:Dmel_CG7878
gene:FBgn0283480	gene:FBgn0283480	Alp2	2R:22206004-22207987	Control	HA	OK	37.7438	50.9635	0.433222	2.15986	0.0001	0.00315339	yes	up	FBgn0283480	dme:Dmel_CG3290
gene:FBgn0028516	gene:FBgn0028516	ZnT35C	2L:15228727-15247714	Control	HA	OK	21.0461	28.5072	0.437775	2.1241	0.00015	0.00444151	yes	up	FBgn0028516	dme:Dmel_CG3994
gene:FBgn0030054	gene:FBgn0030054	Caf1-180	X:8602136-8606304	Control	HA	OK	24.3968	33.2514	0.446724	2.211	0.00015	0.00444151	yes	up	FBgn0030054	dme:Dmel_CG12109
gene:FBgn0032298	gene:FBgn0032298	CG6724	2L:10768233-10769952	Control	HA	OK	14.1203	19.8472	0.491163	2.14261	0.00015	0.00444151	yes	up	FBgn0032298	dme:Dmel_CG6724
gene:FBgn0041164	gene:FBgn0041164	armi	3L:3461316-3466303	Control	HA	OK	14.6124	19.7936	0.437843	2.15361	0.00015	0.00444151	yes	up	FBgn0041164	dme:Dmel_CG11513
gene:FBgn0261535	gene:FBgn0261535	l(2)34Fd	2L:14352076-14355085	Control	HA	OK	10.253	14.7111	0.520859	2.28448	0.00015	0.00444151	yes	up	FBgn0261535	dme:Dmel_CG7516
gene:FBgn0003483	gene:FBgn0003483	spn-E	3R:15837418-15844415	Control	HA	OK	5.30424	7.42557	0.485355	2.14332	0.0002	0.00559549	yes	up	FBgn0003483	dme:Dmel_CG3158
gene:FBgn0036514	gene:FBgn0036514	CG12301	3L:15580799-15583373	Control	HA	OK	11.5064	16.1263	0.486974	2.16374	0.0002	0.00559549	yes	up	FBgn0036514	dme:Dmel_CG12301
gene:FBgn0032430	gene:FBgn0032430	CG6388	2L:12428027-12430892	Control	HA	OK	13.7252	19.1673	0.481821	2.05165	0.00025	0.00670853	yes	up	FBgn0032430	dme:Dmel_CG6388
gene:FBgn0037137	gene:FBgn0037137	Nopp140	3L:21832773-21841356	Control	HA	OK	48.2141	75.7585	0.651953	2.14476	0.00025	0.00670853	yes	up	FBgn0037137	dme:Dmel_CG7421
gene:FBgn0035997	gene:FBgn0035997	phol	3L:9452802-9456281	Control	HA	OK	13.5292	18.0888	0.419019	2.05678	0.0003	0.00777007	yes	up	FBgn0035997	dme:Dmel_CG3445
gene:FBgn0042085	gene:FBgn0042085	Bap170	2R:6636511-6642358	Control	HA	OK	8.43234	11.5954	0.459552	2.2316	0.0003	0.00777007	yes	up	FBgn0042085	dme:Dmel_CG3274
gene:FBgn0033571	gene:FBgn0033571	Rpb5	2R:10898030-10899060	Control	HA	OK	38.6581	53.1786	0.460075	2.05653	0.00035	0.00885952	yes	up	FBgn0033571	dme:Dmel_CG11979
gene:FBgn0036035	gene:FBgn0036035	CG18178	3L:9717785-9719144	Control	HA	OK	33.4058	45.2426	0.43758	2.00761	0.00035	0.00885952	yes	up	FBgn0036035	dme:Dmel_CG18178
gene:FBgn0086694	gene:FBgn0086694	Bre1	3L:5789830-5794192	Control	HA	OK	12.1851	16.6259	0.448316	2.09426	0.0004	0.00985695	yes	up	FBgn0086694	dme:Dmel_CG10542
gene:FBgn0039385	gene:FBgn0039385	CG5913	3R:25893494-25895026	Control	HA	OK	19.0465	26.6275	0.483396	2.1249	0.00045	0.0107797	yes	up	FBgn0039385	dme:Dmel_CG5913
gene:FBgn0034496	gene:FBgn0034496	CG9143	2R:20274596-20278915	Control	HA	OK	12.0673	16.9674	0.491659	1.97303	0.0005	0.0117258	yes	up	FBgn0034496	dme:Dmel_CG9143
gene:FBgn0037811	gene:FBgn0037811	CG12592	3R:10338341-10340872	Control	HA	OK	20.8217	27.6814	0.410827	1.97635	0.0005	0.0117258	yes	up	FBgn0037811	dme:Dmel_CG12592
gene:FBgn0040290	gene:FBgn0040290	RecQ4	3L:8170639-8175978	Control	HA	OK	10.328	13.5875	0.395712	1.91939	0.0005	0.0117258	yes	up	FBgn0040290	dme:Dmel_CG7487
gene:FBgn0086895	gene:FBgn0086895	pea	2R:14153152-14157488	Control	HA	OK	5.42989	7.63744	0.492166	2.00773	0.0005	0.0117258	yes	up	FBgn0086895	dme:Dmel_CG8241
gene:FBgn0031264	gene:FBgn0031264	CG11835	2L:560567-563819	Control	HA	OK	4.53646	6.82121	0.588462	2.10082	0.00055	0.0125812	yes	up	FBgn0031264	dme:Dmel_CG11835
gene:FBgn0033593	gene:FBgn0033593	Listericin	2R:11241744-11242194	Control	HA	OK	31.2395	44.7015	0.516952	2.00419	0.00055	0.0125812	yes	up	FBgn0033593	dme:Dmel_CG9080
gene:FBgn0003278	gene:FBgn0003278	RpI135	2L:404284-407969	Control	HA	OK	6.91483	9.50556	0.459077	2.09273	0.00055	0.0125813	yes	up	FBgn0003278	dme:Dmel_CG4033
gene:FBgn0011284	gene:FBgn0011284	RpS4	3L:13041755-13044234	Control	HA	OK	1532.57	2105.89	0.458472	1.98948	0.0006	0.0133689	yes	up	FBgn0011284	dme:Dmel_CG11276
gene:FBgn0015925	gene:FBgn0015925	csul	2R:16264651-16266959	Control	HA	OK	12.4854	16.9313	0.439454	1.98247	0.0006	0.0133689	yes	up	FBgn0015925	dme:Dmel_CG3730
gene:FBgn0033741	gene:FBgn0033741	CG8545	2R:12465677-12471775	Control	HA	OK	33.9137	45.8786	0.435953	1.96425	0.0006	0.0133689	yes	up	FBgn0033741	dme:Dmel_CG8545
gene:FBgn0036258	gene:FBgn0036258	eIF3l	3L:12143445-12146097	Control	HA	OK	98.0584	129.079	0.396542	1.96321	0.0006	0.0133689	yes	up	FBgn0036258	dme:Dmel_CG5642
gene:FBgn0038968	gene:FBgn0038968	CG12499	3R:22440151-22446587	Control	HA	OK	8.38551	11.0191	0.394038	1.94134	0.0006	0.0133689	yes	up	FBgn0038968	dme:Dmel_CG12499
gene:FBgn0261479	gene:FBgn0261479	nero	3R:31746444-31747558	Control	HA	OK	47.922	63.7411	0.411536	1.94507	0.0006	0.0133689	yes	up	FBgn0261479	dme:Dmel_CG2245
gene:FBgn0003701	gene:FBgn0003701	thr	2R:17860759-17865963	Control	HA	OK	5.60154	7.58791	0.437879	1.99077	0.0007	0.0150271	yes	up	FBgn0003701	dme:Dmel_CG5785
gene:FBgn0005674	gene:FBgn0005674	GluProRS	3R:23952135-23958391	Control	HA	OK	23.0879	31.0833	0.429003	1.97447	0.0007	0.0150271	yes	up	FBgn0005674	dme:Dmel_CG5394
gene:FBgn0011604	gene:FBgn0011604	Iswi	2R:12636670-12640628	Control	HA	OK	16.6993	22.0838	0.403197	1.96253	0.00075	0.0157669	yes	up	FBgn0011604	dme:Dmel_CG8625
gene:FBgn0024364	gene:FBgn0024364	CG11417	X:1354013-1356473	Control	HA	OK	21.3181	28.2294	0.405124	1.91042	0.00075	0.0157669	yes	up	FBgn0024364	dme:Dmel_CG11417
gene:FBgn0020910	gene:FBgn0020910	RpL3	3R:11221893-11225173	Control	HA	OK	1303.52	1824.81	0.485336	1.99291	0.0008	0.0165685	yes	up	FBgn0020910	dme:Dmel_CG4863
gene:FBgn0034391	gene:FBgn0034391	CG15080	2R:18783298-18794594	Control	HA	OK	0.812561	1.337	0.718452	2.02666	0.0008	0.0165685	yes	up	FBgn0034391	dme:Dmel_CG15080
gene:FBgn0015288	gene:FBgn0015288	RpL22	X:762559-765130	Control	HA	OK	1322.35	1805.02	0.448911	1.95954	0.00085	0.0174102	yes	up	FBgn0015288	dme:Dmel_CG7434
gene:FBgn0033526	gene:FBgn0033526	Caf1-105	2R:10466000-10468540	Control	HA	OK	18.7095	25.0022	0.418288	1.97949	0.00085	0.0174102	yes	up	FBgn0033526	dme:Dmel_CG12892
gene:FBgn0053846	gene:FBgn0053846	His1:CG33846	2L:21506683-21507706	Control	HA	OK	4.78343	8.03914	0.748997	1.93446	0.00085	0.0174102	yes	up	FBgn0053846	dme:Dmel_CG31617
gene:FBgn0266195	gene:FBgn0266195	Tgs1	3R:18255529-18257677	Control	HA	OK	10.9754	14.8032	0.431633	1.91947	0.00085	0.0174102	yes	up	FBgn0266195	dme:Dmel_CG44890
gene:FBgn0030858	gene:FBgn0030858	IntS2	X:17652760-17656818	Control	HA	OK	6.78938	9.25847	0.447493	1.96165	0.0009	0.0182005	yes	up	FBgn0030858	dme:Dmel_CG8211
gene:FBgn0053813	gene:FBgn0053813	His1:CG33813	2L:21451051-21452074	Control	HA	OK	5.65224	9.47161	0.744788	2.03819	0.0009	0.0182005	yes	up	FBgn0053813	dme:Dmel_CG31617
gene:FBgn0260954	gene:FBgn0260954	CG42586	2L:14741160-14741840	Control	HA	OK	29.1625	45.2971	0.635304	2.03688	0.0009	0.0182005	yes	up	FBgn0260954	dme:Dmel_CG31775
gene:FBgn0264302	gene:FBgn0264302	CG43780	3L:7333543-7335226	Control	HA	OK	20.4481	26.9454	0.398075	1.90914	0.0009	0.0182005	yes	up	FBgn0264302	dme:Dmel_CG43780
gene:FBgn0026418	gene:FBgn0026418	Hsc70Cb	3L:14037018-14043686	Control	HA	OK	77.8861	103.135	0.405094	1.96455	0.00095	0.0189711	yes	up	FBgn0026418	dme:Dmel_CG6603
gene:FBgn0038012	gene:FBgn0038012	CG10013	3R:12323520-12325210	Control	HA	OK	1.81792	3.11692	0.777836	1.9834	0.001	0.0196878	yes	up	FBgn0038012	dme:Dmel_CG10013
gene:FBgn0033766	gene:FBgn0033766	CG8771	2R:12679966-12686179	Control	HA	OK	5.54663	7.32578	0.401371	1.90764	0.00105	0.0202089	yes	up	FBgn0033766	dme:Dmel_CG8771
gene:FBgn0037249	gene:FBgn0037249	eIF3a	3R:4429797-4433895	Control	HA	OK	90.2396	117.902	0.385759	1.87458	0.00105	0.0202089	yes	up	FBgn0037249	dme:Dmel_CG9805
gene:FBgn0053837	gene:FBgn0053837	His1:CG33837	2L:21491540-21492563	Control	HA	OK	5.25811	8.77981	0.739645	1.96969	0.00105	0.0202089	yes	up	FBgn0053837	dme:Dmel_CG31617
gene:FBgn0021761	gene:FBgn0021761	Nup154	2L:11004819-11011086	Control	HA	OK	13.48	17.8192	0.402612	1.85358	0.0011	0.0208832	yes	up	FBgn0021761	dme:Dmel_CG4579
gene:FBgn0033557	gene:FBgn0033557	CG12325	2R:10823404-10835709	Control	HA	OK	8.1442	10.9677	0.429413	1.90472	0.0011	0.0208832	yes	up	FBgn0033557	dme:Dmel_CG12325
gene:FBgn0086129	gene:FBgn0086129	snama	2R:24086603-24092014	Control	HA	OK	13.4864	17.8163	0.401692	1.92427	0.0011	0.0208832	yes	up	FBgn0086129	dme:Dmel_CG3231
gene:FBgn0040347	gene:FBgn0040347	mus81	X:941074-945773	Control	HA	OK	9.21565	12.7123	0.464069	1.80938	0.00115	0.0215755	yes	up	FBgn0040347	dme:Dmel_CG3026
gene:FBgn0260399	gene:FBgn0260399	gwl	3R:18746369-18750360	Control	HA	OK	31.4409	40.5545	0.367219	1.85336	0.00115	0.0215755	yes	up	FBgn0260399	dme:Dmel_CG7719
gene:FBgn0261800	gene:FBgn0261800	LanB1	2L:7811437-7820771	Control	HA	OK	10.8033	13.9462	0.368401	1.81285	0.00115	0.0215755	yes	up	FBgn0261800	dme:Dmel_CG7123
gene:FBgn0010747	gene:FBgn0010747	Srp54k	3L:5152677-5154777	Control	HA	OK	30.3732	39.5863	0.382202	1.89259	0.0012	0.0223633	yes	up	FBgn0010747	dme:Dmel_CG4659
gene:FBgn0015031	gene:FBgn0015031	cype	2L:5327226-5327969	Control	HA	OK	687.673	897.698	0.384507	1.86704	0.0012	0.0223633	yes	up	FBgn0015031	dme:Dmel_CG14028
gene:FBgn0020765	gene:FBgn0020765	Acp65Aa	3L:6152049-6152745	Control	HA	OK	353.254	468.189	0.406384	1.92051	0.00125	0.0231405	yes	up	FBgn0020765	dme:Dmel_CG10297
gene:FBgn0039302	gene:FBgn0039302	Nup358	3R:25249347-25258672	Control	HA	OK	20.1087	26.2842	0.386376	1.90965	0.00125	0.0231405	yes	up	FBgn0039302	dme:Dmel_CG11856
gene:FBgn0284253	gene:FBgn0284253	LeuRS	2L:3510327-3514656	Control	HA	OK	26.0409	33.6929	0.371664	1.86862	0.00125	0.0231405	yes	up	FBgn0284253	dme:Dmel_CG33123
gene:FBgn0030720	gene:FBgn0030720	CG8939	X:15997015-15999698	Control	HA	OK	31.0344	39.9713	0.365098	1.81261	0.0013	0.02379	yes	up	FBgn0030720	dme:Dmel_CG8939
gene:FBgn0038983	gene:FBgn0038983	CG5326	3R:22532173-22539919	Control	HA	OK	10.6264	14.1576	0.413929	1.89499	0.0013	0.02379	yes	up	FBgn0038983	dme:Dmel_CG5326
gene:FBgn0051368	gene:FBgn0051368	CG31368	3R:11882789-11893297	Control	HA	OK	4.21664	5.92123	0.489803	1.87465	0.0013	0.02379	yes	up	FBgn0051368	dme:Dmel_CG31368
gene:FBgn0033688	gene:FBgn0033688	Prp8	2R:12153070-12162998	Control	HA	OK	12.8585	16.5578	0.364794	1.8178	0.00135	0.0243852	yes	up	FBgn0033688	dme:Dmel_CG8877
gene:FBgn0027088	gene:FBgn0027088	GlyRS	3L:15095141-15097686	Control	HA	OK	49.9934	64.1352	0.359378	1.8067	0.0014	0.0248461	yes	up	FBgn0027088	dme:Dmel_CG6778
gene:FBgn0263667	gene:FBgn0263667	Lpt	2R:23898560-23903661	Control	HA	OK	6.53576	8.69463	0.41177	1.8683	0.0014	0.0248461	yes	up	FBgn0263667	dme:Dmel_CG5591
gene:FBgn0284435	gene:FBgn0284435	tyn	X:142207-200663	Control	HA	OK	2.30119	3.36231	0.547076	1.85191	0.0014	0.0248461	yes	up	FBgn0284435	dme:Dmel_CG17131
gene:FBgn0000355	gene:FBgn0000355	Cp15	3L:8728480-8729066	Control	HA	OK	1136.96	1785.87	0.651438	2.2995	0.00145	0.0254903	yes	up	FBgn0000355	dme:Dmel_CG6519
gene:FBgn0029882	gene:FBgn0029882	CG3226	X:6653112-6654248	Control	HA	OK	151.438	194.683	0.362406	1.81261	0.00145	0.0254903	yes	up	FBgn0029882	dme:Dmel_CG3226
gene:FBgn0032050	gene:FBgn0032050	CG13096	2L:8509068-8511866	Control	HA	OK	37.8941	48.9536	0.369444	1.84334	0.00145	0.0254903	yes	up	FBgn0032050	dme:Dmel_CG13096
gene:FBgn0052344	gene:FBgn0052344	CG32344	3L:321232-324720	Control	HA	OK	17.1731	22.4408	0.385973	1.87522	0.00145	0.0254903	yes	up	FBgn0052344	dme:Dmel_CG32344
gene:FBgn0035281	gene:FBgn0035281	Cpr62Bc	3L:1840280-1842084	Control	HA	OK	20.6348	28.2501	0.453176	1.86895	0.0015	0.0260818	yes	up	FBgn0035281	dme:Dmel_CG1919
gene:FBgn0029525	gene:FBgn0029525	CG18273	X:482776-487581	Control	HA	OK	10.7386	13.8677	0.368922	1.78997	0.00155	0.0267843	yes	up	FBgn0029525	dme:Dmel_CG18273
gene:FBgn0028360	gene:FBgn0028360	Cdc7	X:6654540-6659709	Control	HA	OK	16.8247	21.8548	0.377371	1.85027	0.0016	0.0274359	yes	up	FBgn0028360	dme:Dmel_CG32742
gene:FBgn0261004	gene:FBgn0261004	asl	3R:5603235-5606543	Control	HA	OK	12.5517	16.5935	0.402736	1.83601	0.0016	0.0274359	yes	up	FBgn0261004	dme:Dmel_CG2919
gene:FBgn0034401	gene:FBgn0034401	MetRS	2R:18846857-18850599	Control	HA	OK	12.8752	16.5322	0.360683	1.74014	0.0017	0.0289727	yes	up	FBgn0034401	dme:Dmel_CG15100
gene:FBgn0004401	gene:FBgn0004401	Pep	3L:17638102-17645036	Control	HA	OK	101.529	130.548	0.362687	1.80618	0.00175	0.0295094	yes	up	FBgn0004401	dme:Dmel_CG6143
gene:FBgn0050122	gene:FBgn0050122	CG30122	2R:18632327-18639270	Control	HA	OK	29.0684	37.3309	0.360916	1.82378	0.00175	0.0295094	yes	up	FBgn0050122	dme:Dmel_CG30122
gene:FBgn0053436	gene:FBgn0053436	5SrRNA:CR33436	2R:19735509-19735644	Control	HA	OK	0	7.65735	inf	#NAME?	0.00175	0.0295094	yes	up	FBgn0053436	dme:Dmel_CR33436
gene:FBgn0260456	gene:FBgn0260456	CG4806	2R:24666157-24668343	Control	HA	OK	26.057	33.708	0.37142	1.80086	0.00175	0.0295094	yes	up	FBgn0260456	dme:Dmel_CG4806
gene:FBgn0030504	gene:FBgn0030504	CG2691	X:13619275-13624408	Control	HA	OK	23.0568	29.6597	0.363309	1.81875	0.0018	0.0299009	yes	up	FBgn0030504	dme:Dmel_CG2691
gene:FBgn0039227	gene:FBgn0039227	polybromo	3R:24799966-24805259	Control	HA	OK	11.4145	14.7429	0.369154	1.81358	0.0018	0.0299009	yes	up	FBgn0039227	dme:Dmel_CG11375
gene:FBgn0039232	gene:FBgn0039232	sosie	3R:24833951-24840488	Control	HA	OK	9.67814	12.9516	0.420332	1.77977	0.00185	0.0305496	yes	up	FBgn0039232	dme:Dmel_CG13636
gene:FBgn0053840	gene:FBgn0053840	His1:CG33840	2L:21496585-21497608	Control	HA	OK	5.05218	8.36725	0.727847	1.91091	0.00185	0.0305496	yes	up	FBgn0053840	dme:Dmel_CG31617
gene:FBgn0010488	gene:FBgn0010488	NAT1	2R:12915993-12923734	Control	HA	OK	72.3161	94.0307	0.378815	1.7974	0.0019	0.0310993	yes	up	FBgn0010488	dme:Dmel_CG3845
gene:FBgn0027518	gene:FBgn0027518	Wdr24	3R:29741971-29745092	Control	HA	OK	5.42599	7.46638	0.460524	1.84699	0.0019	0.0310993	yes	up	FBgn0027518	dme:Dmel_CG7609
gene:FBgn0033859	gene:FBgn0033859	fand	2R:13593643-13596557	Control	HA	OK	8.85735	11.754	0.408201	1.80619	0.0019	0.0310993	yes	up	FBgn0033859	dme:Dmel_CG6197
gene:FBgn0039207	gene:FBgn0039207	CG5789	3R:24530575-24543914	Control	HA	OK	19.7815	26.0778	0.398672	1.76628	0.0019	0.0310993	yes	up	FBgn0039207	dme:Dmel_CG5789
gene:FBgn0259785	gene:FBgn0259785	pzg	3L:21286098-21290310	Control	HA	OK	24.2213	31.2528	0.367708	1.83681	0.0019	0.0310993	yes	up	FBgn0259785	dme:Dmel_CG7752
gene:FBgn0033921	gene:FBgn0033921	tej	2R:14300102-14302353	Control	HA	OK	9.85858	13.1374	0.414226	1.7959	0.00195	0.0316854	yes	up	FBgn0033921	dme:Dmel_CG8589
gene:FBgn0040268	gene:FBgn0040268	Top3alpha	2L:19498167-19502268	Control	HA	OK	8.17536	10.6339	0.379319	1.75561	0.00195	0.0316854	yes	up	FBgn0040268	dme:Dmel_CG10123
gene:FBgn0039406	gene:FBgn0039406	RpL34a	3R:26058419-26059267	Control	HA	OK	644.106	823.845	0.355075	1.78888	0.002	0.0323097	yes	up	FBgn0039406	dme:Dmel_CG6090
gene:FBgn0001986	gene:FBgn0001986	Mtr4	2L:15752262-15755900	Control	HA	OK	8.46513	11.03	0.38183	1.76237	0.00205	0.0328795	yes	up	FBgn0001986	dme:Dmel_CG4152
gene:FBgn0027499	gene:FBgn0027499	wde	2R:10800419-10808938	Control	HA	OK	12.364	15.779	0.351857	1.73965	0.00215	0.0342374	yes	up	FBgn0027499	dme:Dmel_CG12340
gene:FBgn0039857	gene:FBgn0039857	RpL6	3R:31594791-31596204	Control	HA	OK	1854.29	2466.71	0.411718	1.78378	0.00215	0.0342374	yes	up	FBgn0039857	dme:Dmel_CG11522
gene:FBgn0010926	gene:FBgn0010926	l(3)07882	3R:17534814-17539963	Control	HA	OK	14.8612	21.3065	0.519747	1.8867	0.0022	0.0348349	yes	up	FBgn0010926	dme:Dmel_CG5824
gene:FBgn0039341	gene:FBgn0039341	CG5112	3R:25491284-25493262	Control	HA	OK	30.1427	39.3477	0.384469	1.75549	0.00225	0.0354756	yes	up	FBgn0039341	dme:Dmel_CG5112
gene:FBgn0001311	gene:FBgn0001311	kkv	3R:5378092-5392866	Control	HA	OK	0.922056	1.41271	0.615537	1.79951	0.0025	0.0384401	yes	up	FBgn0001311	dme:Dmel_CG2666
gene:FBgn0036147	gene:FBgn0036147	Plod	3L:11198165-11206016	Control	HA	OK	22.6174	29.3435	0.375608	1.72108	0.0025	0.0384401	yes	up	FBgn0036147	dme:Dmel_CG6199
gene:FBgn0037924	gene:FBgn0037924	CG14712	3R:11628758-11633206	Control	HA	OK	7.77427	10.045	0.369698	1.72057	0.0025	0.0384401	yes	up	FBgn0037924	dme:Dmel_CG14712
gene:FBgn0033918	gene:FBgn0033918	CG8531	2R:14256492-14258787	Control	HA	OK	38.8217	49.0962	0.33875	1.68137	0.0026	0.0395959	yes	up	FBgn0033918	dme:Dmel_CG8531
gene:FBgn0000547	gene:FBgn0000547	ed	2L:4031376-4115749	Control	HA	OK	10.8901	13.9535	0.357604	1.68937	0.00265	0.0401383	yes	up	FBgn0000547	dme:Dmel_CG12676
gene:FBgn0027079	gene:FBgn0027079	ValRS	2R:13198849-13202709	Control	HA	OK	13.7875	17.577	0.350329	1.69713	0.0027	0.0405109	yes	up	FBgn0027079	dme:Dmel_CG4062
gene:FBgn0031756	gene:FBgn0031756	CG13992	2L:5965390-5967752	Control	HA	OK	12.3999	16.1567	0.381809	1.71825	0.0027	0.0405109	yes	up	FBgn0031756	dme:Dmel_CG13992
gene:FBgn0039789	gene:FBgn0039789	CG9717	3R:30584019-30587302	Control	HA	OK	7.7284	10.1219	0.389234	1.7777	0.0027	0.0405109	yes	up	FBgn0039789	dme:Dmel_CG9717
gene:FBgn0050085	gene:FBgn0050085	Rif1	2R:15864308-15869147	Control	HA	OK	8.33357	10.7715	0.370217	1.74562	0.0027	0.0405109	yes	up	FBgn0050085	dme:Dmel_CG30085
gene:FBgn0025633	gene:FBgn0025633	CG13366	X:582120-620195	Control	HA	OK	19.4342	25.0718	0.367469	1.73605	0.00275	0.0408765	yes	up	FBgn0025633	dme:Dmel_CG13366
gene:FBgn0026207	gene:FBgn0026207	mbo	3R:12676486-12679052	Control	HA	OK	9.06771	12.0922	0.415266	1.80004	0.00275	0.0408765	yes	up	FBgn0026207	dme:Dmel_CG6819
gene:FBgn0053804	gene:FBgn0053804	His1:CG33804	2L:21426915-21427938	Control	HA	OK	4.65984	7.52853	0.692087	1.76303	0.00275	0.0408765	yes	up	FBgn0053804	dme:Dmel_CG31617
gene:FBgn0039215	gene:FBgn0039215	CG6695	3R:24655159-24659379	Control	HA	OK	15.323	19.6243	0.356939	1.70461	0.00285	0.0419164	yes	up	FBgn0039215	dme:Dmel_CG6695
gene:FBgn0035149	gene:FBgn0035149	MED30	3L:652986-654089	Control	HA	OK	9.32414	13.1269	0.493489	1.73314	0.00295	0.0427673	yes	up	FBgn0035149	dme:Dmel_CG17183
gene:FBgn0260991	gene:FBgn0260991	Incenp	2R:7278466-7281795	Control	HA	OK	31.6895	40.3065	0.347007	1.69131	0.00295	0.0427673	yes	up	FBgn0260991	dme:Dmel_CG12165
gene:FBgn0085256	gene:FBgn0085256	CG34227	2R:11248125-11248610	Control	HA	OK	37.71	51.5724	0.451651	1.85545	0.003	0.0433795	yes	up	FBgn0085256	dme:Dmel_CG34227
gene:FBgn0033548	gene:FBgn0033548	CG7637	2R:10809396-10810936	Control	HA	OK	204.021	283.341	0.47382	1.81558	0.00305	0.0438187	yes	up	FBgn0033548	dme:Dmel_CG7637
gene:FBgn0015805	gene:FBgn0015805	HDAC1	3L:4626601-4629467	Control	HA	OK	57.427	72.9235	0.344655	1.72095	0.0031	0.0441394	yes	up	FBgn0015805	dme:Dmel_CG7471
gene:FBgn0026252	gene:FBgn0026252	msk	3L:8116178-8121579	Control	HA	OK	68.3101	86.8443	0.346333	1.68522	0.0031	0.0441394	yes	up	FBgn0026252	dme:Dmel_CG7935
gene:FBgn0266282	gene:FBgn0266282	jnj	3R:24189049-24193423	Control	HA	OK	7.94853	10.3586	0.382065	1.71456	0.0031	0.0441394	yes	up	FBgn0266282	dme:Dmel_CG5524
gene:FBgn0034447	gene:FBgn0034447	CG7744	2R:19452503-19455527	Control	HA	OK	14.8746	19.0257	0.355101	1.68207	0.00315	0.0446804	yes	up	FBgn0034447	dme:Dmel_CG7744
gene:FBgn0266570	gene:FBgn0266570	CG2982	X:4319437-4321745	Control	HA	OK	61.033	76.872	0.332868	1.66988	0.00315	0.0446804	yes	up	FBgn0266570	dme:Dmel_CG2982
gene:FBgn0023395	gene:FBgn0023395	Chd3	3L:19447172-19450238	Control	HA	OK	8.50938	11.1606	0.391285	1.7178	0.0032	0.0451601	yes	up	FBgn0023395	dme:Dmel_CG9594
gene:FBgn0030096	gene:FBgn0030096	Zpr1	X:9160123-9162090	Control	HA	OK	14.5968	19.1401	0.390946	1.70067	0.0032	0.0451601	yes	up	FBgn0030096	dme:Dmel_CG9060
gene:FBgn0037566	gene:FBgn0037566	mRpL1	3R:8301439-8304023	Control	HA	OK	42.7007	55.7694	0.385214	1.71255	0.0032	0.0451601	yes	up	FBgn0037566	dme:Dmel_CG7494
gene:FBgn0001206	gene:FBgn0001206	Hmr	X:10590919-10595855	Control	HA	OK	2.453	3.39813	0.470192	1.69131	0.00325	0.0455776	yes	up	FBgn0001206	dme:Dmel_CG1619
gene:FBgn0035336	gene:FBgn0035336	CG9004	3L:2373727-2377556	Control	HA	OK	9.82032	13.6496	0.475022	1.67203	0.00325	0.0455776	yes	up	FBgn0035336	dme:Dmel_CG9004
gene:FBgn0040066	gene:FBgn0040066	wds	X:2585979-2588217	Control	HA	OK	27.9803	36.057	0.365866	1.69782	0.00325	0.0455776	yes	up	FBgn0040066	dme:Dmel_CG17437
gene:FBgn0034249	gene:FBgn0034249	RhoGAP54D	2R:17586424-17590884	Control	HA	OK	3.20967	4.32412	0.429984	1.67262	0.0033	0.0458753	yes	up	FBgn0034249	dme:Dmel_CG6477
gene:FBgn0039654	gene:FBgn0039654	Brd8	3R:29223484-29227725	Control	HA	OK	7.46368	9.95221	0.415129	1.69836	0.0033	0.0458753	yes	up	FBgn0039654	dme:Dmel_CG14514
gene:FBgn0043854	gene:FBgn0043854	slam	2L:6372387-6377284	Control	HA	OK	3.71725	5.16077	0.473351	1.7068	0.0033	0.0458753	yes	up	FBgn0043854	dme:Dmel_CG9506
gene:FBgn0051755	gene:FBgn0051755	SoYb	2L:9995560-10002736	Control	HA	OK	4.32126	5.74391	0.41058	1.72928	0.0033	0.0458753	yes	up	FBgn0051755	dme:Dmel_CG31755
gene:FBgn0037926	gene:FBgn0037926	Elp1	3R:11650970-11655691	Control	HA	OK	7.96634	10.2963	0.370135	1.71954	0.0034	0.046973	yes	up	FBgn0037926	dme:Dmel_CG10535
gene:FBgn0283724	gene:FBgn0283724	Girdin	3L:3178929-3186549	Control	HA	OK	8.78079	11.2364	0.35576	1.68019	0.0034	0.046973	yes	up	FBgn0283724	dme:Dmel_CG12734
gene:FBgn0038577	gene:FBgn0038577	CG12321	3R:18183655-18188707	Control	HA	OK	76.7411	109.105	0.507641	1.67944	0.00345	0.047429	yes	up	FBgn0038577	dme:Dmel_CG12321
gene:FBgn0032454	gene:FBgn0032454	CG5787	2L:12708791-12712952	Control	HA	OK	12.4805	15.8597	0.345688	1.67857	0.0035	0.047647	yes	up	FBgn0032454	dme:Dmel_CG5787
gene:FBgn0037360	gene:FBgn0037360	CG2182	3R:5655138-5660570	Control	HA	OK	44.2697	56.7647	0.358674	1.68512	0.0035	0.047647	yes	up	FBgn0037360	dme:Dmel_CG2182
gene:FBgn0284256	gene:FBgn0284256	bsf	2L:18449516-18454587	Control	HA	OK	22.5077	28.5432	0.34273	1.72205	0.0035	0.047647	yes	up	FBgn0284256	dme:Dmel_CG10302
gene:FBgn0053807	gene:FBgn0053807	His1:CG33807	2L:21431962-21432985	Control	HA	OK	4.78483	7.6902	0.684555	1.76106	0.00355	0.0481515	yes	up	FBgn0053807	dme:Dmel_CG33807
gene:FBgn0263832	gene:FBgn0263832	Rcd5	3L:4040528-4042597	Control	HA	OK	26.1776	33.1809	0.342021	1.65024	0.00355	0.0481515	yes	up	FBgn0263832	dme:Dmel_CG1135
gene:FBgn0264994	gene:FBgn0264994	CR44145	2L:11736401-11737541	Control	HA	OK	0.398197	1.01252	1.34639	1.8477	0.0036	0.0485348	yes	up	FBgn0264994	dme:Dmel_CR44145
gene:FBgn0262560	gene:FBgn0262560	wcd	2R:16345837-16347500	Control	HA	OK	19.998	25.9431	0.375497	1.70358	0.00365	0.0490312	yes	up	FBgn0262560	dme:Dmel_CG7989
gene:FBgn0263855	gene:FBgn0263855	BubR1	2R:5969098-5974385	Control	HA	OK	6.90845	8.86972	0.360526	1.68279	0.00365	0.0490312	yes	up	FBgn0263855	dme:Dmel_CG7838
gene:FBgn0002526	gene:FBgn0002526	LanA	3L:6203830-6218022	Control	HA	OK	6.39367	8.0371	0.330032	1.64664	0.0037	0.0494056	yes	up	FBgn0002526	dme:Dmel_CG10236
gene:FBgn0029172	gene:FBgn0029172	Fad2	3L:11023534-11024846	Control	HA	OK	133.785	169.685	0.342944	1.69776	0.0037	0.0494056	yes	up	FBgn0029172	dme:Dmel_CG7923
gene:FBgn0042177	gene:FBgn0042177	CG32164	3L:16603052-16609347	Control	HA	OK	25.3359	32.3125	0.35091	1.64482	0.0037	0.0494056	yes	up	FBgn0042177	dme:Dmel_CG32164
gene:FBgn0024285	gene:FBgn0024285	Srp54	2L:9912910-9915044	Control	HA	OK	36.5843	46.0335	0.331459	1.644	0.00375	0.0497756	yes	up	FBgn0024285	dme:Dmel_CG4602
gene:FBgn0053864	gene:FBgn0053864	His1:CG33864	2L:21536345-21537368	Control	HA	OK	5.46314	8.54701	0.645689	1.73785	0.00375	0.0497756	yes	up	FBgn0053864	dme:Dmel_CG33819
gene:FBgn0002931	gene:FBgn0002931	net	2L:82420-87387	Control	HA	OK	2.33699	1.41665	-0.722171	-1.71503	0.0038	0.0503196	no
gene:FBgn0039310	gene:FBgn0039310	CG11878	3R:25273836-25275237	Control	HA	OK	26.7609	34.3576	0.360502	1.72665	0.0038	0.0503196	no
gene:FBgn0052220	gene:FBgn0052220	Csas	3L:19986092-19988947	Control	HA	OK	12.3826	8.38892	-0.561752	-1.68736	0.00385	0.0508009	no
gene:FBgn0262127	gene:FBgn0262127	kibra	3R:14697688-14724261	Control	HA	OK	5.17604	6.649	0.361288	1.68451	0.00385	0.0508009	no
gene:FBgn0263083	gene:FBgn0263083	CG43351	2R:19022324-19032642	Control	HA	OK	329.72	249.306	-0.403321	-1.69503	0.00385	0.0508009	no
gene:FBgn0285954	gene:FBgn0285954	caz	X:16288809-16293520	Control	HA	OK	28.837	36.6521	0.345977	1.6854	0.0039	0.0513999	no
gene:FBgn0022700	gene:FBgn0022700	Cht4	2R:21065378-21067087	Control	HA	OK	4.17563	2.68062	-0.63943	-1.68141	0.00395	0.0517533	no
gene:FBgn0026593	gene:FBgn0026593	CG5707	3L:2189159-2192221	Control	HA	OK	29.9808	23.4343	-0.355418	-1.66068	0.00395	0.0517533	no
gene:FBgn0028530	gene:FBgn0028530	mTTF	2L:14347238-14348790	Control	HA	OK	24.6874	19.111	-0.369373	-1.66469	0.00395	0.0517533	no
gene:FBgn0029771	gene:FBgn0029771	CG12730	X:5516607-5518771	Control	HA	OK	13.2421	9.8976	-0.419986	-1.61951	0.00395	0.0517533	no
gene:FBgn0036921	gene:FBgn0036921	RhoGDI	3L:19928742-19932930	Control	HA	OK	179.034	141.694	-0.337453	-1.6812	0.00395	0.0517533	no
gene:FBgn0000024	gene:FBgn0000024	Ace	3R:13222950-13259517	Control	HA	OK	4.02212	2.98473	-0.430356	-1.70545	0.004	0.0521636	no
gene:FBgn0032405	gene:FBgn0032405	firl	2L:12063456-12066775	Control	HA	OK	3.31126	2.04193	-0.697446	-1.70084	0.004	0.0521636	no
gene:FBgn0033521	gene:FBgn0033521	CG12896	2R:10426879-10427915	Control	HA	OK	23.2852	16.9733	-0.456144	-1.67909	0.004	0.0521636	no
gene:FBgn0034237	gene:FBgn0034237	eIF3b	2R:17536212-17539142	Control	HA	OK	175.749	222.725	0.341744	1.64502	0.004	0.0521636	no
gene:FBgn0031732	gene:FBgn0031732	CG11149	2L:5718120-5720899	Control	HA	OK	5.73441	4.09956	-0.484177	-1.66234	0.00405	0.052448	no
gene:FBgn0032242	gene:FBgn0032242	CG5355	2L:10410536-10413463	Control	HA	OK	42.7883	53.7218	0.328289	1.64651	0.00405	0.052448	no
gene:FBgn0037485	gene:FBgn0037485	CG14606	3R:7214338-7217083	Control	HA	OK	4.77262	3.43653	-0.473831	-1.67298	0.00405	0.052448	no
gene:FBgn0037810	gene:FBgn0037810	sle	3R:10333114-10338265	Control	HA	OK	37.8364	47.5591	0.329948	1.6526	0.00405	0.052448	no
gene:FBgn0038734	gene:FBgn0038734	CG11453	3R:19783521-19785519	Control	HA	OK	4.79109	3.29285	-0.541015	-1.65876	0.00405	0.052448	no
gene:FBgn0261963	gene:FBgn0261963	mid	2L:5461638-5467610	Control	HA	OK	1.67489	2.78605	0.734153	1.68753	0.00405	0.052448	no
gene:FBgn0263402	gene:FBgn0263402	CG43448	3R:30237093-30237734	Control	HA	OK	19.4657	12.7123	-0.614708	-1.79839	0.0041	0.053034	no
gene:FBgn0034331	gene:FBgn0034331	CG15067	2R:18384566-18385589	Control	HA	OK	415.201	306.702	-0.436972	-1.64401	0.00415	0.0536186	no
gene:FBgn0015229	gene:FBgn0015229	glec	3R:21850693-21856266	Control	HA	OK	23.8257	29.9453	0.32981	1.71	0.0042	0.0538285	no
gene:FBgn0030433	gene:FBgn0030433	mRpL49	X:12907104-12907942	Control	HA	OK	85.1417	66.4107	-0.35845	-1.67448	0.0042	0.0538285	no
gene:FBgn0037205	gene:FBgn0037205	BoYb	3L:22901911-22905470	Control	HA	OK	4.96063	6.48037	0.385553	1.648	0.0042	0.0538285	no
gene:FBgn0039016	gene:FBgn0039016	Dcr-1	3R:22734006-22741091	Control	HA	OK	3.68524	4.77041	0.372356	1.6326	0.0042	0.0538285	no
gene:FBgn0050349	gene:FBgn0050349	CG30349	2R:8907517-8910885	Control	HA	OK	28.5692	36.0998	0.337529	1.66537	0.0042	0.0538285	no
gene:FBgn0053801	gene:FBgn0053801	His1:CG33801	2L:21416952-21417975	Control	HA	OK	4.96566	7.84206	0.659245	1.71972	0.0042	0.0538285	no
gene:FBgn0260799	gene:FBgn0260799	p120ctn	2R:4595287-4609492	Control	HA	OK	76.3329	60.6347	-0.332161	-1.6969	0.0042	0.0538285	no
gene:FBgn0259990	gene:FBgn0259990	CG42487	3R:27957355-27959245	Control	HA	OK	12.4073	16.6028	0.420235	1.64197	0.00425	0.0543445	no
gene:FBgn0266284	gene:FBgn0266284	Ns3	X:1461843-1464220	Control	HA	OK	26.4151	33.4695	0.341483	1.62487	0.00425	0.0543445	no
gene:FBgn0011832	gene:FBgn0011832	Ser12	2L:2250430-2251275	Control	HA	OK	84.686	67.0477	-0.336935	-1.66676	0.00435	0.0553064	no
gene:FBgn0019624	gene:FBgn0019624	COX5A	3R:11819358-11820299	Control	HA	OK	3934.12	3047.3	-0.368506	-1.64632	0.00435	0.0553064	no
gene:FBgn0033357	gene:FBgn0033357	Tom7	2R:8951594-8952242	Control	HA	OK	390.211	309.578	-0.33395	-1.69844	0.00435	0.0553064	no
gene:FBgn0035357	gene:FBgn0035357	MEP-1	3L:2631714-2641984	Control	HA	OK	26.7705	33.6627	0.330507	1.64519	0.00435	0.0553064	no
gene:FBgn0261403	gene:FBgn0261403	sxc	2R:5307287-5329555	Control	HA	OK	53.5646	42.7639	-0.324886	-1.64851	0.00435	0.0553064	no
gene:FBgn0030855	gene:FBgn0030855	CG5800	X:17636280-17639003	Control	HA	OK	17.3427	22.1225	0.351185	1.65488	0.0044	0.0556884	no
gene:FBgn0037371	gene:FBgn0037371	Sym	3R:5738177-5742476	Control	HA	OK	5.84003	7.591	0.378315	1.67215	0.0044	0.0556884	no
gene:FBgn0040349	gene:FBgn0040349	CG3699	X:946661-947500	Control	HA	OK	57.9418	44.8776	-0.368608	-1.66309	0.0044	0.0556884	no
gene:FBgn0284251	gene:FBgn0284251	l(2)05287	2L:21094965-21102429	Control	HA	OK	11.8061	15.312	0.375124	1.63751	0.0044	0.0556884	no
gene:FBgn0032946	gene:FBgn0032946	nrv3	2L:21379999-21393319	Control	HA	OK	61.1134	45.495	-0.42578	-1.70555	0.00445	0.0561303	no
gene:FBgn0034479	gene:FBgn0034479	CG8654	2R:19979241-19984895	Control	HA	OK	15.5238	12.1888	-0.348928	-1.60616	0.00445	0.0561303	no
gene:FBgn0062961	gene:FBgn0062961	pncr016:2R	2R:18711390-18711951	Control	HA	OK	13.111	8.31252	-0.657419	-1.68322	0.00445	0.0561303	no
gene:FBgn0000120	gene:FBgn0000120	Arr1	2L:18078268-18081307	Control	HA	OK	539.624	420.887	-0.35852	-1.67467	0.0045	0.056697	no
gene:FBgn0030040	gene:FBgn0030040	CG15347	X:8458493-8460898	Control	HA	OK	140.757	112.367	-0.324987	-1.62826	0.00455	0.0571978	no
gene:FBgn0040308	gene:FBgn0040308	Jafrac2	3L:3042358-3046812	Control	HA	OK	64.8519	45.2317	-0.519815	-1.68321	0.00455	0.0571978	no
gene:FBgn0026197	gene:FBgn0026197	noe	3L:17396030-17421514	Control	HA	OK	67.0888	44.4171	-0.594957	-1.67971	0.0046	0.0575026	no
gene:FBgn0037248	gene:FBgn0037248	srl	3R:4422482-4429335	Control	HA	OK	25.2759	31.736	0.328361	1.64416	0.0046	0.0575026	no
gene:FBgn0050009	gene:FBgn0050009	CR30009	2R:10261314-10263827	Control	HA	OK	0.584555	0.112467	-2.37784	-2.24798	0.0046	0.0575026	no
gene:FBgn0053825	gene:FBgn0053825	His1:CG33825	2L:21471258-21472281	Control	HA	OK	5.2005	8.08159	0.635991	1.67054	0.0046	0.0575026	no
gene:FBgn0260959	gene:FBgn0260959	MCPH1	2R:11895996-11903918	Control	HA	OK	19.255	25.7717	0.420552	1.65515	0.0046	0.0575026	no
gene:FBgn0027889	gene:FBgn0027889	ball	3R:26864604-26866807	Control	HA	OK	28.3383	35.9142	0.341805	1.63765	0.00465	0.0578684	no
gene:FBgn0028974	gene:FBgn0028974	xmas-2	X:17151230-17159306	Control	HA	OK	3.38962	4.44945	0.392502	1.62038	0.00465	0.0578684	no
gene:FBgn0036821	gene:FBgn0036821	CG3961	3L:18878249-18890483	Control	HA	OK	44.5067	35.3091	-0.333983	-1.66688	0.00465	0.0578684	no
gene:FBgn0039055	gene:FBgn0039055	Rassf	3R:23114013-23117931	Control	HA	OK	14.8532	18.5621	0.321588	1.60054	0.00465	0.0578684	no
gene:FBgn0003961	gene:FBgn0003961	Uro	2L:7780084-7781415	Control	HA	OK	26.2926	34.0165	0.371579	1.67888	0.0047	0.0583605	no
gene:FBgn0263834	gene:FBgn0263834	CR43696	3R:22296869-22297544	Control	HA	OK	4.68758	2.67904	-0.807127	-1.69398	0.0047	0.0583605	no
gene:FBgn0004882	gene:FBgn0004882	orb	3R:23260609-23280856	Control	HA	OK	27.0631	34.5801	0.353614	1.66436	0.00475	0.0587852	no
gene:FBgn0033062	gene:FBgn0033062	Ars2	2R:6080827-6085625	Control	HA	OK	28.3325	35.5947	0.329203	1.64219	0.00475	0.0587852	no
gene:FBgn0283478	gene:FBgn0283478	und	2L:9763368-9765338	Control	HA	OK	134.524	168.72	0.326764	1.628	0.00475	0.0587852	no
gene:FBgn0004864	gene:FBgn0004864	hop	X:11360929-11368098	Control	HA	OK	7.62865	9.69329	0.345559	1.63884	0.0048	0.0592071	no
gene:FBgn0014075	gene:FBgn0014075	Ugt	3L:18872746-18878245	Control	HA	OK	14.2559	17.8042	0.320654	1.60427	0.0048	0.0592071	no
gene:FBgn0033518	gene:FBgn0033518	Prx2540-2	2R:10418717-10419761	Control	HA	OK	22.0246	16.0005	-0.460992	-1.6883	0.0048	0.0592071	no
gene:FBgn0003292	gene:FBgn0003292	rt	3L:11584121-11587770	Control	HA	OK	3.29031	4.47135	0.442486	1.63885	0.00485	0.0596262	no
gene:FBgn0027537	gene:FBgn0027537	Nup93-1	X:13822825-13825910	Control	HA	OK	24.886	31.0798	0.320641	1.58697	0.00485	0.0596262	no
gene:FBgn0031630	gene:FBgn0031630	CG15629	2L:4813008-4818245	Control	HA	OK	5.95212	3.64748	-0.706506	-1.68936	0.00485	0.0596262	no
gene:FBgn0039402	gene:FBgn0039402	Vps2	3R:26052820-26054128	Control	HA	OK	54.2362	42.6082	-0.348125	-1.65302	0.0049	0.0600425	no
gene:FBgn0040687	gene:FBgn0040687	CG14645	3R:4334878-4337674	Control	HA	OK	5876.53	3839.13	-0.614185	-1.64968	0.0049	0.0600425	no
gene:FBgn0042103	gene:FBgn0042103	CG18746	3R:7788281-7790187	Control	HA	OK	2.75139	1.651	-0.736818	-1.67372	0.0049	0.0600425	no
gene:FBgn0014861	gene:FBgn0014861	Mcm2	3R:8264969-8267924	Control	HA	OK	24.745	30.9552	0.323043	1.60846	0.00495	0.0604561	no
gene:FBgn0020508	gene:FBgn0020508	Ag5r2	X:14782961-14784052	Control	HA	OK	115.494	91.8929	-0.329797	-1.64459	0.00495	0.0604561	no
gene:FBgn0032023	gene:FBgn0032023	CG14274	2L:8338286-8342056	Control	HA	OK	3.6183	2.40787	-0.587551	-1.71216	0.00495	0.0604561	no
gene:FBgn0039732	gene:FBgn0039732	CG15525	3R:29995356-29997676	Control	HA	OK	70.7748	52.0273	-0.443966	-1.71137	0.005	0.061	no
gene:FBgn0052438	gene:FBgn0052438	SMC5	3L:21569175-21573523	Control	HA	OK	10.6932	13.5304	0.339505	1.6156	0.00505	0.0615427	no
gene:FBgn0026148	gene:FBgn0026148	CG12253	2L:10987805-10989241	Control	HA	OK	14.4356	10.6948	-0.432714	-1.61815	0.0051	0.0620843	no
gene:FBgn0051410	gene:FBgn0051410	Npc2e	3R:10049198-10054348	Control	HA	OK	24.4519	11.6822	-1.06563	-1.76238	0.00515	0.0626247	no
gene:FBgn0022027	gene:FBgn0022027	Vps25	2R:8625450-8626180	Control	HA	OK	71.0817	56.0747	-0.34213	-1.5909	0.00525	0.0633576	no
gene:FBgn0032157	gene:FBgn0032157	Etl1	2L:9908829-9912608	Control	HA	OK	19.5648	24.5455	0.327199	1.61364	0.00525	0.0633576	no
gene:FBgn0033160	gene:FBgn0033160	Dhx15	2R:7387186-7393161	Control	HA	OK	29.3199	36.7096	0.324278	1.61753	0.00525	0.0633576	no
gene:FBgn0035266	gene:FBgn0035266	Gk2	3L:1738406-1745421	Control	HA	OK	29.3002	23.3434	-0.327894	-1.6059	0.00525	0.0633576	no
gene:FBgn0037764	gene:FBgn0037764	CG9459	3R:9817427-9818395	Control	HA	OK	19.1303	14.5985	-0.390038	-1.60556	0.00525	0.0633576	no
gene:FBgn0038701	gene:FBgn0038701	CG18493	3R:19368994-19403153	Control	HA	OK	62.2288	44.2096	-0.493223	-1.6286	0.00525	0.0633576	no
gene:FBgn0039332	gene:FBgn0039332	alrm	3R:25347430-25473058	Control	HA	OK	16.2635	9.11749	-0.834925	-1.6726	0.00525	0.0633576	no
gene:FBgn0000046	gene:FBgn0000046	Act87E	3R:13425832-13428375	Control	HA	OK	156.897	197.978	0.335522	1.6219	0.0053	0.063823	no
gene:FBgn0039163	gene:FBgn0039163	CG5515	3R:24186358-24188896	Control	HA	OK	128.093	99.3007	-0.367315	-1.65453	0.0053	0.063823	no
gene:FBgn0005322	gene:FBgn0005322	nmd	2L:10302172-10303947	Control	HA	OK	36.2394	45.7504	0.336228	1.59832	0.00535	0.0642864	no
gene:FBgn0028948	gene:FBgn0028948	CG15253	2L:15615356-15616351	Control	HA	OK	3.99392	2.48006	-0.687429	-1.6277	0.00535	0.0642864	no
gene:FBgn0032666	gene:FBgn0032666	CG5758	2L:18119994-18129862	Control	HA	OK	15.9164	12.7053	-0.325077	-1.58832	0.0054	0.0646783	no
gene:FBgn0034588	gene:FBgn0034588	CG9394	2R:21101927-21123704	Control	HA	OK	22.7751	17.8328	-0.352929	-1.63932	0.0054	0.0646783	no
gene:FBgn0265760	gene:FBgn0265760	CR44567	3L:17633039-17633317	Control	HA	OK	1.20503	0	#NAME?	#NAME?	0.0054	0.0646783	no
gene:FBgn0022069	gene:FBgn0022069	Nnp-1	2L:13363307-13366189	Control	HA	OK	37.38	46.6082	0.318317	1.61525	0.00545	0.0651374	no
gene:FBgn0266916	gene:FBgn0266916	Cenp-C	3R:8564104-8569248	Control	HA	OK	9.08035	11.4947	0.340152	1.63183	0.00545	0.0651374	no
gene:FBgn0012034	gene:FBgn0012034	AcCoAS	3L:21270721-21280243	Control	HA	OK	190.887	150.941	-0.338734	-1.57727	0.0055	0.065385	no
gene:FBgn0027329	gene:FBgn0027329	CCT6	X:15746647-15748971	Control	HA	OK	145.25	181.894	0.324563	1.61245	0.0055	0.065385	no
gene:FBgn0032049	gene:FBgn0032049	Bace	2L:8491867-8506845	Control	HA	OK	1348.03	1039.06	-0.375575	-1.63149	0.0055	0.065385	no
gene:FBgn0033271	gene:FBgn0033271	CG8708	2R:8159405-8161565	Control	HA	OK	5.20388	3.50963	-0.56827	-1.64227	0.0055	0.065385	no
gene:FBgn0266111	gene:FBgn0266111	ana3	2R:12344982-12351325	Control	HA	OK	3.84021	4.91535	0.356108	1.57801	0.0055	0.065385	no
gene:FBgn0037686	gene:FBgn0037686	RpL34b	3R:9400236-9401226	Control	HA	OK	2737.61	3466.48	0.340556	1.58986	0.00555	0.0658392	no
gene:FBgn0053834	gene:FBgn0053834	His1:CG33834	2L:21486495-21487518	Control	HA	OK	4.81425	7.49935	0.639454	1.6491	0.00555	0.0658392	no
gene:FBgn0003087	gene:FBgn0003087	pim	2L:10362988-10364092	Control	HA	OK	64.4198	50.9472	-0.3385	-1.68365	0.0056	0.0662212	no
gene:FBgn0031514	gene:FBgn0031514	CG3332	2L:3275799-3280534	Control	HA	OK	9.50012	7.27374	-0.385249	-1.60771	0.0056	0.0662212	no
gene:FBgn0032246	gene:FBgn0032246	CG5168	2L:10423290-10425482	Control	HA	OK	46.1763	57.7116	0.321709	1.60929	0.0056	0.0662212	no
gene:FBgn0010278	gene:FBgn0010278	Ssrp	2R:23806360-23809004	Control	HA	OK	40.2865	50.2079	0.317615	1.59211	0.00565	0.0665305	no
gene:FBgn0027657	gene:FBgn0027657	glob1	3R:15896925-15904521	Control	HA	OK	402.53	320.583	-0.328397	-1.58653	0.00565	0.0665305	no
gene:FBgn0038269	gene:FBgn0038269	Rrp6	3R:14879456-14886246	Control	HA	OK	10.4512	14.1703	0.439204	1.60204	0.00565	0.0665305	no
gene:FBgn0259715	gene:FBgn0259715	CG42369	2L:6377770-6411326	Control	HA	OK	72.1139	55.5628	-0.37616	-1.60119	0.00565	0.0665305	no
gene:FBgn0001565	gene:FBgn0001565	Hlc	X:21385517-21387946	Control	HA	OK	56.1568	69.8558	0.314919	1.5781	0.0057	0.0667672	no
gene:FBgn0015338	gene:FBgn0015338	CG5861	2L:16303263-16307298	Control	HA	OK	75.3794	58.8366	-0.357458	-1.6368	0.0057	0.0667672	no
gene:FBgn0033081	gene:FBgn0033081	geminin	2R:6655462-6656594	Control	HA	OK	104.741	130.709	0.319525	1.59533	0.0057	0.0667672	no
gene:FBgn0033949	gene:FBgn0033949	CG10131	2R:14629909-14631023	Control	HA	OK	4.74282	2.95606	-0.682067	-1.64886	0.0057	0.0667672	no
gene:FBgn0039131	gene:FBgn0039131	CG12268	3R:23943627-23948424	Control	HA	OK	8.05298	5.90924	-0.446551	-1.61662	0.0057	0.0667672	no
gene:FBgn0015279	gene:FBgn0015279	Pi3K92E	3R:20628971-20634732	Control	HA	OK	12.5949	15.7409	0.321673	1.59406	0.00575	0.0671415	no
gene:FBgn0027620	gene:FBgn0027620	Acf	3R:31793980-31805278	Control	HA	OK	13.8988	17.5768	0.338714	1.58423	0.00575	0.0671415	no
gene:FBgn0037351	gene:FBgn0037351	RpL13A	3R:5624473-5625947	Control	HA	OK	2275.39	2919.48	0.359595	1.60076	0.00575	0.0671415	no
gene:FBgn0032818	gene:FBgn0032818	CG10628	2L:19757244-19758615	Control	HA	OK	15.0062	19.6107	0.38608	1.58154	0.0058	0.0675135	no
gene:FBgn0045866	gene:FBgn0045866	bai	3R:25039373-25045151	Control	HA	OK	129.561	101.866	-0.346965	-1.62135	0.0058	0.0675135	no
gene:FBgn0262881	gene:FBgn0262881	CG43236	2R:14638537-14638935	Control	HA	OK	6.38822	2.06257	-1.63097	-1.60019	0.0058	0.0675135	no
gene:FBgn0033485	gene:FBgn0033485	RpLP0-like	2R:10096479-10099590	Control	HA	OK	134.029	100.671	-0.412907	-1.60042	0.00585	0.0679537	no
gene:FBgn0035024	gene:FBgn0035024	CG11414	2R:24561606-24565058	Control	HA	OK	18.7472	23.3356	0.315853	1.54692	0.00585	0.0679537	no
gene:FBgn0032949	gene:FBgn0032949	Lamp1	2L:21573388-21577103	Control	HA	OK	302.017	239.619	-0.33389	-1.63193	0.0059	0.0684633	no
gene:FBgn0002441	gene:FBgn0002441	l(3)mbt	3R:27265456-27273273	Control	HA	OK	7.44489	9.41802	0.339173	1.58414	0.00595	0.0689003	no
gene:FBgn0039102	gene:FBgn0039102	SPE	3R:23684056-23688147	Control	HA	OK	37.9266	29.8085	-0.347486	-1.6222	0.00595	0.0689003	no
gene:FBgn0035670	gene:FBgn0035670	CG10472	3L:6059657-6062910	Control	HA	OK	774.668	616.726	-0.328949	-1.57641	0.006	0.0691921	no
gene:FBgn0039525	gene:FBgn0039525	CG5646	3R:27559378-27561319	Control	HA	OK	15.4545	11.7284	-0.398015	-1.58837	0.006	0.0691921	no
gene:FBgn0065046	gene:FBgn0065046	snoRNA:U3:9B	X:10348169-10348337	Control	HA	OK	3.27451	0	#NAME?	#NAME?	0.006	0.0691921	no
gene:FBgn0083953	gene:FBgn0083953	CG34117	3R:9399569-9400053	Control	HA	OK	306.706	242.117	-0.341153	-1.63465	0.006	0.0691921	no
gene:FBgn0030354	gene:FBgn0030354	Upf1	X:11899995-11905371	Control	HA	OK	11.859	14.7685	0.316547	1.57324	0.00605	0.0695532	no
gene:FBgn0031176	gene:FBgn0031176	whe	X:21402338-21402772	Control	HA	OK	2194.25	1735.23	-0.338602	-1.68527	0.00605	0.0695532	no
gene:FBgn0037489	gene:FBgn0037489	CG1234	3R:7244231-7246969	Control	HA	OK	19.9574	25.0047	0.325276	1.57189	0.00605	0.0695532	no
gene:FBgn0026238	gene:FBgn0026238	gus	2R:5116989-5129296	Control	HA	OK	132.074	105.577	-0.323051	-1.62338	0.0061	0.0699839	no
gene:FBgn0053099	gene:FBgn0053099	CG33099	3R:22528919-22530572	Control	HA	OK	14.5581	11.0882	-0.392797	-1.56933	0.0061	0.0699839	no
gene:FBgn0024329	gene:FBgn0024329	Mekk1	3R:18733105-18743594	Control	HA	OK	10.0956	12.68	0.328828	1.59157	0.00615	0.0704128	no
gene:FBgn0259876	gene:FBgn0259876	Cap-G	2R:13133141-13142820	Control	HA	OK	10.6663	13.4369	0.333134	1.59022	0.00615	0.0704128	no
gene:FBgn0038063	gene:FBgn0038063	Octbeta2R	3R:12550624-12595725	Control	HA	OK	2.78425	2.10071	-0.406412	-1.59361	0.0062	0.0709125	no
gene:FBgn0001491	gene:FBgn0001491	l(1)10Bb	X:11324293-11325308	Control	HA	OK	39.1394	30.748	-0.34813	-1.61376	0.00625	0.0713382	no
gene:FBgn0033775	gene:FBgn0033775	Cyp9h1	2R:12840812-12842558	Control	HA	OK	7.19995	5.16442	-0.479381	-1.58736	0.00625	0.0713382	no
gene:FBgn0000307	gene:FBgn0000307	chif	2L:16342429-16352628	Control	HA	OK	13.3712	16.8128	0.330429	1.61582	0.0063	0.071616	no
gene:FBgn0020300	gene:FBgn0020300	geko	3L:18139401-18145418	Control	HA	OK	10.3178	7.59323	-0.442355	-1.59798	0.0063	0.071616	no
gene:FBgn0024734	gene:FBgn0024734	PRL-1	2L:16245834-16257606	Control	HA	OK	86.6837	69.0974	-0.327129	-1.72048	0.0063	0.071616	no
gene:FBgn0032961	gene:FBgn0032961	CG1416	2L:21758009-21761000	Control	HA	OK	103.533	128.677	0.313672	1.56103	0.0063	0.071616	no
gene:FBgn0037312	gene:FBgn0037312	CG11999	3R:5353716-5354747	Control	HA	OK	70.6456	56.0423	-0.334084	-1.59104	0.00635	0.0721109	no
gene:FBgn0051957	gene:FBgn0051957	CG31957	2L:3867696-3872458	Control	HA	OK	50.4215	37.7642	-0.417023	-1.60178	0.0064	0.0726049	no
gene:FBgn0030701	gene:FBgn0030701	CG16952	X:15870182-15875607	Control	HA	OK	11.0625	13.8949	0.328875	1.56481	0.00645	0.0727286	no
gene:FBgn0031143	gene:FBgn0031143	CG1532	X:21026124-21028361	Control	HA	OK	126.053	100.82	-0.322259	-1.5861	0.00645	0.0727286	no
gene:FBgn0033916	gene:FBgn0033916	Usp20-33	2R:14239931-14243655	Control	HA	OK	8.75543	11.1363	0.347015	1.57891	0.00645	0.0727286	no
gene:FBgn0034295	gene:FBgn0034295	CG10911	2R:18052549-18054066	Control	HA	OK	304.159	241.974	-0.329973	-1.59915	0.00645	0.0727286	no
gene:FBgn0034755	gene:FBgn0034755	CG3746	2R:22648994-22649750	Control	HA	OK	16.0101	10.6806	-0.58399	-1.63755	0.00645	0.0727286	no
gene:FBgn0259098	gene:FBgn0259098	CG42246	X:7411266-7411906	Control	HA	OK	28.4882	19.8459	-0.521525	-1.57084	0.00645	0.0727286	no
gene:FBgn0011288	gene:FBgn0011288	Snap25	3L:24074179-24299205	Control	HA	OK	10.1951	7.93887	-0.360866	-1.72485	0.0065	0.073071	no
gene:FBgn0031115	gene:FBgn0031115	CG11710	X:20427410-20429673	Control	HA	OK	26.4847	20.9136	-0.340716	-1.58532	0.0065	0.073071	no
gene:FBgn0040759	gene:FBgn0040759	CG13177	2R:12163674-12164896	Control	HA	OK	10.6015	15.547	0.55236	1.61748	0.0065	0.073071	no
gene:FBgn0031677	gene:FBgn0031677	CG14036	2L:5054578-5055016	Control	HA	OK	314.953	253.751	-0.311726	-1.61157	0.00655	0.0734113	no
gene:FBgn0036996	gene:FBgn0036996	mag	3L:20453292-20466041	Control	HA	OK	116.113	91.9665	-0.336344	-1.58825	0.00655	0.0734113	no
gene:FBgn0039006	gene:FBgn0039006	Cyp6d4	3R:22698318-22700307	Control	HA	OK	8.67305	6.43977	-0.429531	-1.59228	0.00655	0.0734113	no
gene:FBgn0029769	gene:FBgn0029769	frma	X:5446655-5496052	Control	HA	OK	13.5929	9.68353	-0.48925	-1.61613	0.0066	0.0736022	no
gene:FBgn0032286	gene:FBgn0032286	CG7300	2L:10694999-10698195	Control	HA	OK	5.28509	7.13834	0.43366	1.62439	0.0066	0.0736022	no
gene:FBgn0032896	gene:FBgn0032896	CG14400	2L:20852577-20857891	Control	HA	OK	16.2128	11.2822	-0.523079	-1.55998	0.0066	0.0736022	no
gene:FBgn0085424	gene:FBgn0085424	nub	2L:12587624-12646356	Control	HA	OK	2.52045	1.72544	-0.546717	-1.57921	0.0066	0.0736022	no
gene:FBgn0263762	gene:FBgn0263762	CG43679	3L:15014694-15064977	Control	HA	OK	358.553	273.981	-0.388111	-1.53819	0.0066	0.0736022	no
gene:FBgn0016122	gene:FBgn0016122	Acer	2L:8521932-8528618	Control	HA	OK	45.0538	33.5632	-0.424769	-1.56438	0.00665	0.0737179	no
gene:FBgn0030063	gene:FBgn0030063	CG1789	X:8720519-8721503	Control	HA	OK	76.5726	60.2351	-0.346223	-1.60107	0.00665	0.0737179	no
gene:FBgn0030631	gene:FBgn0030631	CG6227	X:15345168-15350021	Control	HA	OK	7.49433	9.62524	0.361023	1.60492	0.00665	0.0737179	no
gene:FBgn0030796	gene:FBgn0030796	CG4829	X:16811698-16826494	Control	HA	OK	6.38677	4.82232	-0.405357	-1.55969	0.00665	0.0737179	no
gene:FBgn0034291	gene:FBgn0034291	CG5770	2R:18044045-18045073	Control	HA	OK	10.8752	7.57976	-0.520812	-1.56913	0.00665	0.0737179	no
gene:FBgn0034935	gene:FBgn0034935	Orcokinin	2R:23946958-23949076	Control	HA	OK	30.433	22.1596	-0.457702	-1.5818	0.00665	0.0737179	no
gene:FBgn0033413	gene:FBgn0033413	prel	2R:9424086-9426107	Control	HA	OK	61.8262	49.9593	-0.307467	-1.53857	0.0067	0.0741985	no
gene:FBgn0036124	gene:FBgn0036124	CG7839	3L:11074768-11078736	Control	HA	OK	18.4633	22.8991	0.310626	1.54471	0.00675	0.0746781	no
gene:FBgn0266095	gene:FBgn0266095	CR44832	X:5790951-5791536	Control	HA	OK	16.0595	11.1757	-0.523069	-1.61429	0.00685	0.0756346	no
gene:FBgn0266488	gene:FBgn0266488	CG45087	2R:18536766-18539416	Control	HA	OK	194.033	154.211	-0.331393	-1.55039	0.00685	0.0756346	no
gene:FBgn0003462	gene:FBgn0003462	Sod1	3L:11112280-11113740	Control	HA	OK	1012.45	806.75	-0.327658	-1.55655	0.0069	0.0759612	no
gene:FBgn0033028	gene:FBgn0033028	CG11665	2R:5640914-5652815	Control	HA	OK	33.299	26.9286	-0.306343	-1.54463	0.0069	0.0759612	no
gene:FBgn0051612	gene:FBgn0051612	CG31612	2L:21762313-21795447	Control	HA	OK	0.677953	1.07632	0.666847	1.59704	0.0069	0.0759612	no
gene:FBgn0033294	gene:FBgn0033294	Mal-A4	2R:8458814-8460884	Control	HA	OK	18.2671	14.1774	-0.365658	-1.54316	0.00695	0.0764363	no
gene:FBgn0011771	gene:FBgn0011771	Hem	3L:22284353-22288195	Control	HA	OK	5.79522	7.40095	0.352846	1.57337	0.007	0.0767593	no
gene:FBgn0031516	gene:FBgn0031516	CG9663	2L:3294925-3303130	Control	HA	OK	8.01904	6.27792	-0.353143	-1.53066	0.007	0.0767593	no
gene:FBgn0032051	gene:FBgn0032051	CG13097	2L:8512173-8514868	Control	HA	OK	20.5504	25.6285	0.318582	1.53773	0.007	0.0767593	no
gene:FBgn0037956	gene:FBgn0037956	CG6959	3R:11822701-11869460	Control	HA	OK	7.72868	6.05065	-0.35313	-1.58563	0.00705	0.077156	no
gene:FBgn0260396	gene:FBgn0260396	CG42521	3L:10623065-10623576	Control	HA	OK	119.628	93.6159	-0.353725	-1.55494	0.00705	0.077156	no
gene:FBgn0042105	gene:FBgn0042105	CG18748	3R:7786169-7787923	Control	HA	OK	8.38266	6.02485	-0.476483	-1.55344	0.0071	0.0775512	no
gene:FBgn0266580	gene:FBgn0266580	Gp210	2R:5760861-5774324	Control	HA	OK	13.824	17.201	0.315321	1.56988	0.0071	0.0775512	no
gene:FBgn0003356	gene:FBgn0003356	Jon99Cii	3R:29923753-29924615	Control	HA	OK	1010.72	803.885	-0.330318	-1.61907	0.00715	0.078021	no
gene:FBgn0037722	gene:FBgn0037722	CG8319	3R:9627320-9628676	Control	HA	OK	14.257	18.5394	0.378929	1.54091	0.0072	0.0783368	no
gene:FBgn0042187	gene:FBgn0042187	CG17234	2L:2253044-2253852	Control	HA	OK	2.0729	1.07667	-0.945081	-1.58682	0.0072	0.0783368	no
gene:FBgn0051821	gene:FBgn0051821	CG31821	2L:15900934-15902410	Control	HA	OK	5.42518	3.78684	-0.518677	-1.57411	0.0072	0.0783368	no
gene:FBgn0028480	gene:FBgn0028480	CG17841	X:10368051-10385861	Control	HA	OK	78.0996	60.2312	-0.374806	-1.57057	0.0073	0.0792703	no
gene:FBgn0030769	gene:FBgn0030769	CG13012	X:16668817-16676753	Control	HA	OK	12.7365	8.82687	-0.528994	-1.56066	0.0073	0.0792703	no
gene:FBgn0035043	gene:FBgn0035043	CG4781	2R:24639687-24642239	Control	HA	OK	12.3425	9.40828	-0.391634	-1.548	0.00735	0.0797357	no
gene:FBgn0033268	gene:FBgn0033268	Obp44a	2R:8131430-8135315	Control	HA	OK	203.242	133.299	-0.608537	-1.58474	0.0074	0.0802002	no
gene:FBgn0030851	gene:FBgn0030851	CG8326	X:17628163-17629492	Control	HA	OK	25.5707	32.726	0.355946	1.54691	0.00745	0.0805076	no
gene:FBgn0036126	gene:FBgn0036126	Irbp18	3L:11096495-11100578	Control	HA	OK	88.8226	60.1626	-0.56206	-1.60299	0.00745	0.0805076	no
gene:FBgn0038183	gene:FBgn0038183	CG9286	3R:13780963-13782082	Control	HA	OK	41.2581	51.9433	0.332259	1.524	0.00745	0.0805076	no
gene:FBgn0001341	gene:FBgn0001341	l(1)1Bi	X:629772-635545	Control	HA	OK	8.42162	11.4802	0.44698	1.55351	0.0075	0.0808132	no
gene:FBgn0011787	gene:FBgn0011787	mRpL12	3L:8956790-8957584	Control	HA	OK	147.294	183.731	0.3189	1.5689	0.0075	0.0808132	no
gene:FBgn0261053	gene:FBgn0261053	Cad86C	3R:10827078-10849030	Control	HA	OK	1.06448	1.48886	0.484061	1.56431	0.0075	0.0808132	no
gene:FBgn0032235	gene:FBgn0032235	CG5096	2L:10380102-10384723	Control	HA	OK	31.5077	24.7635	-0.347488	-1.54907	0.00755	0.0811171	no
gene:FBgn0042178	gene:FBgn0042178	CG32165	3L:16595180-16602723	Control	HA	OK	14.2661	18.5549	0.379211	1.54293	0.00755	0.0811171	no
gene:FBgn0051235	gene:FBgn0051235	CG31235	3R:18316074-18328942	Control	HA	OK	1.15056	0.542799	-1.08384	-1.63955	0.00755	0.0811171	no
gene:FBgn0032222	gene:FBgn0032222	CG5037	2L:10331470-10333129	Control	HA	OK	108.198	87.8134	-0.301157	-1.51082	0.0076	0.0813411	no
gene:FBgn0039461	gene:FBgn0039461	CG5500	3R:26876629-26881171	Control	HA	OK	50.6239	40.4693	-0.322993	-1.52007	0.0076	0.0813411	no
gene:FBgn0053774	gene:FBgn0053774	CG33774	2R:9399079-9400329	Control	HA	OK	91.0543	61.6061	-0.563654	-1.56669	0.0076	0.0813411	no
gene:FBgn0261394	gene:FBgn0261394	Prosalpha3	2R:20994899-20996118	Control	HA	OK	372.559	300.746	-0.308921	-1.51973	0.0076	0.0813411	no
gene:FBgn0004587	gene:FBgn0004587	B52	3R:13661310-13666891	Control	HA	OK	87.3948	110.845	0.342927	1.55759	0.00765	0.0814856	no
gene:FBgn0036589	gene:FBgn0036589	CG13067	3L:16271281-16271918	Control	HA	OK	53.612	40.9059	-0.390249	-1.53928	0.00765	0.0814856	no
gene:FBgn0038749	gene:FBgn0038749	Xport-A	3R:19914319-19915412	Control	HA	OK	60.0903	43.8872	-0.453331	-1.63088	0.00765	0.0814856	no
gene:FBgn0051345	gene:FBgn0051345	CG31345	3R:12811144-12817029	Control	HA	OK	11.5739	8.05156	-0.523532	-1.56496	0.00765	0.0814856	no
gene:FBgn0261385	gene:FBgn0261385	scra	2R:7590118-7595242	Control	HA	OK	12.5927	15.9786	0.343544	1.56079	0.00765	0.0814856	no
gene:FBgn0030776	gene:FBgn0030776	CG4653	X:16696130-16711145	Control	HA	OK	67.9459	34.327	-0.985044	-1.65049	0.0077	0.081862	no
gene:FBgn0260995	gene:FBgn0260995	dpr21	2R:3066498-3191011	Control	HA	OK	10.3119	7.48576	-0.462086	-1.67809	0.0077	0.081862	no
gene:FBgn0033624	gene:FBgn0033624	CG12384	2R:11357901-11359176	Control	HA	OK	408.244	330.934	-0.302887	-1.53041	0.00775	0.0822369	no
gene:FBgn0265312	gene:FBgn0265312	CR44285	2R:9605638-9605870	Control	HA	OK	0	1.12831	inf	#NAME?	0.00775	0.0822369	no
gene:FBgn0016697	gene:FBgn0016697	Prosalpha5	2R:17412766-17413769	Control	HA	OK	426.258	343.346	-0.312062	-1.52446	0.0078	0.082376	no
gene:FBgn0035793	gene:FBgn0035793	CG7546	3L:7510941-7517316	Control	HA	OK	13.0724	16.2362	0.312687	1.54259	0.0078	0.082376	no
gene:FBgn0036062	gene:FBgn0036062	CG6685	3L:9908119-9968317	Control	HA	OK	15.2869	9.97596	-0.615769	-1.56797	0.0078	0.082376	no
gene:FBgn0036515	gene:FBgn0036515	AIMP2	3L:15583637-15585347	Control	HA	OK	79.49	64.1038	-0.310365	-1.54201	0.0078	0.082376	no
gene:FBgn0038474	gene:FBgn0038474	mRpS11	3R:17072731-17073795	Control	HA	OK	77.7242	61.9474	-0.32732	-1.53979	0.0078	0.082376	no
gene:FBgn0035575	gene:FBgn0035575	CG7509	3L:4803076-4805274	Control	HA	OK	0.859098	0.449	-0.936108	-1.60739	0.0079	0.0832745	no
gene:FBgn0036038	gene:FBgn0036038	defl	3L:9723422-9726706	Control	HA	OK	5.02197	6.52687	0.378136	1.53933	0.0079	0.0832745	no
gene:FBgn0041605	gene:FBgn0041605	cpx	3R:4280220-4304604	Control	HA	OK	71.1299	56.2132	-0.339546	-1.69449	0.00795	0.0835648	no
gene:FBgn0261286	gene:FBgn0261286	Mat89Ba	3R:16267011-16272415	Control	HA	OK	7.60109	9.621	0.33998	1.56636	0.00795	0.0835648	no
gene:FBgn0261596	gene:FBgn0261596	RpS24	2R:22640525-22641419	Control	HA	OK	2167.19	2746.94	0.342002	1.5671	0.00795	0.0835648	no
gene:FBgn0004237	gene:FBgn0004237	Hrb87F	3R:13656845-13660531	Control	HA	OK	77.0863	95.9281	0.315479	1.54461	0.008	0.0839323	no
gene:FBgn0267252	gene:FBgn0267252	Ggamma30A	2L:9256562-9302494	Control	HA	OK	271.153	206.744	-0.391264	-1.57949	0.008	0.0839323	no
gene:FBgn0030981	gene:FBgn0030981	CG14191	X:19081664-19082566	Control	HA	OK	0.463475	1.40447	1.59946	1.8044	0.00805	0.0842985	no
gene:FBgn0034255	gene:FBgn0034255	Oxp	2R:17604950-17639138	Control	HA	OK	214.527	152.489	-0.492453	-1.57819	0.00805	0.0842985	no
gene:FBgn0029176	gene:FBgn0029176	eEF1gamma	3R:29220171-29222109	Control	HA	OK	1146.14	1473.51	0.362474	1.56138	0.0081	0.084505	no
gene:FBgn0036188	gene:FBgn0036188	CG7339	3L:11648755-11650499	Control	HA	OK	31.4017	23.9583	-0.39032	-1.53997	0.0081	0.084505	no
gene:FBgn0039916	gene:FBgn0039916	Ekar	4:636130-646556	Control	HA	OK	1.54202	1.03617	-0.573563	-1.57868	0.0081	0.084505	no
gene:FBgn0046999	gene:FBgn0046999	CG6429	2R:16873014-16873755	Control	HA	OK	19.8758	14.5158	-0.453393	-1.5732	0.0081	0.084505	no
gene:FBgn0039805	gene:FBgn0039805	Cpr100A	3R:30867520-30869184	Control	HA	OK	20.9468	26.7694	0.353857	1.55884	0.00815	0.0849472	no
gene:FBgn0027512	gene:FBgn0027512	CG10254	3R:23689006-23694983	Control	HA	OK	54.5114	67.6662	0.311877	1.51562	0.0082	0.0853886	no
gene:FBgn0028734	gene:FBgn0028734	Fmr1	3R:10101419-10110121	Control	HA	OK	39.8796	50.1276	0.329955	1.55719	0.00825	0.0857493	no
gene:FBgn0036697	gene:FBgn0036697	rogdi	3L:17049511-17055454	Control	HA	OK	40.98	33.163	-0.305348	-1.63387	0.00825	0.0857493	no
gene:FBgn0029992	gene:FBgn0029992	Upf2	X:8070243-8075466	Control	HA	OK	7.3546	9.18297	0.320314	1.51908	0.0083	0.0860287	no
gene:FBgn0030439	gene:FBgn0030439	CG12716	X:12974682-12976231	Control	HA	OK	7.72523	5.48393	-0.494368	-1.50233	0.0083	0.0860287	no
gene:FBgn0085466	gene:FBgn0085466	CG34437	3R:28283718-28284725	Control	HA	OK	1.49693	0.769612	-0.959807	-1.57191	0.0083	0.0860287	no
gene:FBgn0034802	gene:FBgn0034802	CNBP	2R:22934568-22937077	Control	HA	OK	390.701	491.439	0.330948	1.53012	0.00835	0.0864667	no
gene:FBgn0002183	gene:FBgn0002183	dre4	3L:1871573-1876312	Control	HA	OK	35.7168	43.9397	0.298922	1.50572	0.0084	0.0866628	no
gene:FBgn0033296	gene:FBgn0033296	Mal-A7	2R:8468645-8471663	Control	HA	OK	11.6622	8.86278	-0.396014	-1.5345	0.0084	0.0866628	no
gene:FBgn0035644	gene:FBgn0035644	DNApol-epsilon58	3L:5895690-5897435	Control	HA	OK	5.66791	7.69969	0.441982	1.55625	0.0084	0.0866628	no
gene:FBgn0037328	gene:FBgn0037328	RpL35A	3R:5465629-5467101	Control	HA	OK	1650.93	2055.37	0.316117	1.52606	0.0084	0.0866628	no
gene:FBgn0038597	gene:FBgn0038597	CG8064	3R:18283659-18288777	Control	HA	OK	9.21387	11.6283	0.335756	1.49916	0.00845	0.0870178	no
gene:FBgn0015038	gene:FBgn0015038	Cyp9b1	2R:7086315-7129808	Control	HA	OK	6.98209	5.08687	-0.456882	-1.51067	0.00845	0.0870179	no
gene:FBgn0020306	gene:FBgn0020306	dom	2R:21323429-21341847	Control	HA	OK	28.3653	35.0639	0.30586	1.4944	0.0085	0.0872912	no
gene:FBgn0032390	gene:FBgn0032390	dgt2	2L:11989935-11992848	Control	HA	OK	55.2708	42.2331	-0.388144	-1.52866	0.0085	0.0872912	no
gene:FBgn0036825	gene:FBgn0036825	RpL26	3L:18898874-18900408	Control	HA	OK	2220.28	2888.45	0.379555	1.54009	0.0085	0.0872912	no
gene:FBgn0032691	gene:FBgn0032691	Atac2	2L:18609575-18612249	Control	HA	OK	4.05273	5.47318	0.433486	1.52475	0.00855	0.0876434	no
gene:FBgn0085220	gene:FBgn0085220	Ufm1	2R:16948295-16955266	Control	HA	OK	220.135	164.323	-0.421858	-1.5243	0.00855	0.0876434	no
gene:FBgn0032205	gene:FBgn0032205	CG4957	2L:10268871-10269904	Control	HA	OK	42.6362	33.3034	-0.356408	-1.54793	0.0086	0.088075	no
gene:FBgn0003885	gene:FBgn0003885	alphaTub84D	3R:7530752-7532732	Control	HA	OK	78.435	97.0204	0.306791	1.53601	0.00865	0.088344	no
gene:FBgn0035431	gene:FBgn0035431	CG14968	3L:3299335-3303112	Control	HA	OK	24.6264	18.7221	-0.395464	-1.54264	0.00865	0.088344	no
gene:FBgn0053178	gene:FBgn0053178	CG33178	X:15082615-15084017	Control	HA	OK	37.0406	28.4263	-0.381881	-1.53555	0.00865	0.088344	no
gene:FBgn0004403	gene:FBgn0004403	RpS14a	X:7933741-7934677	Control	HA	OK	1677.26	2109.32	0.330677	1.52571	0.0087	0.0883695	no
gene:FBgn0011020	gene:FBgn0011020	Sas-4	3R:7151366-7154219	Control	HA	OK	7.41146	9.66142	0.382476	1.50507	0.0087	0.0883695	no
gene:FBgn0034085	gene:FBgn0034085	Ptp52F	2R:16171111-16178307	Control	HA	OK	4.06721	3.14235	-0.372199	-1.47808	0.0087	0.0883695	no
gene:FBgn0037025	gene:FBgn0037025	Spc105R	3L:20800409-20806853	Control	HA	OK	3.59937	4.59394	0.351987	1.51367	0.0087	0.0883695	no
gene:FBgn0037517	gene:FBgn0037517	CG10086	3R:7790632-7793483	Control	HA	OK	10.1506	7.7287	-0.393268	-1.5244	0.0087	0.0883695	no
gene:FBgn0038578	gene:FBgn0038578	MED17	3R:18189071-18191967	Control	HA	OK	9.76964	12.6479	0.372516	1.51535	0.0087	0.0883695	no
gene:FBgn0014033	gene:FBgn0014033	Sr-CI	2L:4121701-4124153	Control	HA	OK	3.53328	2.58708	-0.449686	-1.53254	0.00875	0.0884749	no
gene:FBgn0025839	gene:FBgn0025839	ND-B14.5A	X:2172525-2180998	Control	HA	OK	608.773	474.095	-0.360727	-1.5294	0.00875	0.0884749	no
gene:FBgn0026533	gene:FBgn0026533	Dek	2R:16856219-16867714	Control	HA	OK	54.6303	70.6596	0.371183	1.52892	0.00875	0.0884749	no
gene:FBgn0029152	gene:FBgn0029152	Mkrn1	3L:21529958-21533713	Control	HA	OK	56.1573	45.0875	-0.316747	-1.59052	0.00875	0.0884749	no
gene:FBgn0029905	gene:FBgn0029905	Nf-YC	X:6818177-6820919	Control	HA	OK	12.6979	15.9645	0.330279	1.52283	0.00875	0.0884749	no
gene:FBgn0024732	gene:FBgn0024732	Drep1	2R:12044611-12050172	Control	HA	OK	16.5415	20.6187	0.317866	1.52952	0.0088	0.0888195	no
gene:FBgn0085376	gene:FBgn0085376	CG34347	3R:31311156-31371748	Control	HA	OK	1.7019	2.22885	0.389155	1.5028	0.0088	0.0888195	no
gene:FBgn0030574	gene:FBgn0030574	CG9413	X:14584732-14602580	Control	HA	OK	17.8271	14.3848	-0.309525	-1.54241	0.00885	0.0890023	no
gene:FBgn0033880	gene:FBgn0033880	CG6553	2R:13854577-13855894	Control	HA	OK	3.06239	1.57764	-0.956888	-1.60246	0.00885	0.0890023	no
gene:FBgn0034240	gene:FBgn0034240	MESR4	2R:17547768-17556289	Control	HA	OK	4.95571	6.16897	0.31594	1.4948	0.00885	0.0890023	no
gene:FBgn0040942	gene:FBgn0040942	CG12643	X:10264232-10265263	Control	HA	OK	16.8901	12.7324	-0.407673	-1.53179	0.00885	0.0890023	no
gene:FBgn0027548	gene:FBgn0027548	nito	2R:7962462-7972003	Control	HA	OK	11.8191	15.9614	0.433461	1.50428	0.0089	0.0894246	no
gene:FBgn0031873	gene:FBgn0031873	Gas41	2L:6949309-6950207	Control	HA	OK	36.3796	28.2537	-0.364692	-1.54863	0.00895	0.0898461	no
gene:FBgn0028744	gene:FBgn0028744	CG5033	2R:17789678-17792448	Control	HA	OK	28.9801	35.7306	0.302098	1.49395	0.009	0.0901049	no
gene:FBgn0259113	gene:FBgn0259113	DNApol-alpha180	3R:21664388-21671750	Control	HA	OK	7.58045	9.47363	0.321633	1.49485	0.009	0.0901049	no
gene:FBgn0260817	gene:FBgn0260817	gkt	2L:3159949-3162399	Control	HA	OK	23.6231	19.0264	-0.312193	-1.50798	0.009	0.0901049	no
gene:FBgn0039628	gene:FBgn0039628	CG11841	3R:29051055-29052267	Control	HA	OK	30.9709	24.1728	-0.357528	-1.51562	0.00905	0.0905243	no
gene:FBgn0002901	gene:FBgn0002901	mus304	3L:18109813-18112847	Control	HA	OK	4.42537	5.83069	0.397869	1.49862	0.0091	0.0907804	no
gene:FBgn0039682	gene:FBgn0039682	Obp99c	3R:29682502-29689311	Control	HA	OK	1388.01	1114.45	-0.31669	-1.52844	0.0091	0.0907804	no
gene:FBgn0052029	gene:FBgn0052029	Cpr66D	3L:8640438-8643584	Control	HA	OK	7.79963	5.33881	-0.546887	-1.54853	0.0091	0.0907804	no
gene:FBgn0015544	gene:FBgn0015544	spag	2R:24159383-24161503	Control	HA	OK	18.9281	23.8228	0.331813	1.50877	0.00915	0.0910352	no
gene:FBgn0030362	gene:FBgn0030362	regucalcin	X:12012376-12017961	Control	HA	OK	128.552	99.9636	-0.362878	-1.51822	0.00915	0.0910352	no
gene:FBgn0031043	gene:FBgn0031043	Naa20A	X:19621450-19623074	Control	HA	OK	27.1746	34.037	0.324844	1.51795	0.00915	0.0910352	no
gene:FBgn0028988	gene:FBgn0028988	Spn42Dd	2R:6880994-6884873	Control	HA	OK	12.8097	9.26751	-0.466983	-1.51649	0.0092	0.0912075	no
gene:FBgn0033216	gene:FBgn0033216	CG1946	2R:7714922-7716781	Control	HA	OK	15.8656	12.3485	-0.361566	-1.53163	0.0092	0.0912075	no
gene:FBgn0038181	gene:FBgn0038181	CG9297	3R:13771494-13779317	Control	HA	OK	139.076	174.312	0.325798	1.50911	0.0092	0.0912075	no
gene:FBgn0038854	gene:FBgn0038854	CG7044	3R:21098228-21101718	Control	HA	OK	10.4494	13.0463	0.32022	1.49997	0.0092	0.0912075	no
gene:FBgn0031925	gene:FBgn0031925	Cyp4d21	2L:7605599-7607701	Control	HA	OK	2.95056	2.00651	-0.556302	-1.53534	0.00925	0.0915406	no
gene:FBgn0033048	gene:FBgn0033048	CG7881	2R:5960274-5966856	Control	HA	OK	7.29123	5.54731	-0.394374	-1.498	0.00925	0.0915406	no
gene:FBgn0263998	gene:FBgn0263998	Ack-like	2R:13142833-13152677	Control	HA	OK	10.0942	12.5932	0.319118	1.50588	0.00935	0.0924482	no
gene:FBgn0027054	gene:FBgn0027054	CSN4	2R:7972174-7974099	Control	HA	OK	50.9105	62.6164	0.298575	1.48423	0.0094	0.0926145	no
gene:FBgn0041156	gene:FBgn0041156	exex	3L:7948185-7951563	Control	HA	OK	2.90888	1.99863	-0.54145	-1.56323	0.0094	0.0926145	no
gene:FBgn0050096	gene:FBgn0050096	CG30096	2R:16320814-16322124	Control	HA	OK	6.58132	4.66164	-0.497538	-1.61059	0.0094	0.0926145	no
gene:FBgn0086356	gene:FBgn0086356	tum	2R:13856149-13858689	Control	HA	OK	21.6575	26.763	0.305371	1.47855	0.0094	0.0926145	no
gene:FBgn0015520	gene:FBgn0015520	nonA-l	3R:16640204-16643112	Control	HA	OK	7.54194	9.63121	0.352783	1.50327	0.00945	0.092943	no
gene:FBgn0034389	gene:FBgn0034389	Mctp	2R:18761757-18774824	Control	HA	OK	4.74214	6.15648	0.376569	1.48765	0.00945	0.092943	no
gene:FBgn0033233	gene:FBgn0033233	Kdm4A	2R:7922774-7924988	Control	HA	OK	7.33506	9.50814	0.374355	1.52675	0.0095	0.0931885	no
gene:FBgn0037141	gene:FBgn0037141	DNApol-eta	3L:21934703-21941812	Control	HA	OK	7.36891	9.60794	0.382775	1.50354	0.0095	0.0931885	no
gene:FBgn0038466	gene:FBgn0038466	CG8907	3R:17008268-17012533	Control	HA	OK	14.4319	11.2934	-0.353779	-1.51363	0.0095	0.0931885	no
gene:FBgn0031266	gene:FBgn0031266	Sf3b1	2L:568339-572907	Control	HA	OK	10.3181	12.7948	0.31039	1.48318	0.00955	0.0933508	no
gene:FBgn0038973	gene:FBgn0038973	Pebp1	3R:22466033-22466679	Control	HA	OK	994.246	801.185	-0.311467	-1.54927	0.00955	0.0933508	no
gene:FBgn0051262	gene:FBgn0051262	CG31262	3R:17217115-17223074	Control	HA	OK	3.11222	2.21926	-0.487865	-1.5407	0.00955	0.0933508	no
gene:FBgn0250850	gene:FBgn0250850	rig	2R:20633875-20640681	Control	HA	OK	17.0839	21.0186	0.299029	1.482	0.00955	0.0933508	no
gene:FBgn0003091	gene:FBgn0003091	Pkc53E	2R:16924654-16945126	Control	HA	OK	4.39521	3.29674	-0.414895	-1.52294	0.0096	0.0936755	no
gene:FBgn0039186	gene:FBgn0039186	CG5746	3R:24343894-24348791	Control	HA	OK	23.8817	29.5675	0.308105	1.51397	0.0096	0.0936755	no
gene:FBgn0003044	gene:FBgn0003044	Pcl	2R:18135425-18139990	Control	HA	OK	17.4199	21.3459	0.293221	1.46862	0.00965	0.0938353	no
gene:FBgn0010741	gene:FBgn0010741	Pfdn2	3L:11070525-11074388	Control	HA	OK	174.854	140.138	-0.319308	-1.46493	0.00965	0.0938353	no
gene:FBgn0039828	gene:FBgn0039828	CG1542	3R:31213457-31215942	Control	HA	OK	54.3442	68.6388	0.3369	1.51154	0.00965	0.0938353	no
gene:FBgn0052675	gene:FBgn0052675	Tango5	X:10760047-10764413	Control	HA	OK	38.414	47.4396	0.304459	1.49285	0.00965	0.0938353	no
gene:FBgn0034021	gene:FBgn0034021	CG8180	2R:15472174-15482834	Control	HA	OK	46.5535	57.3997	0.302151	1.49105	0.00975	0.0947252	no
gene:FBgn0000564	gene:FBgn0000564	Eh	3R:17446641-17448858	Control	HA	OK	3.56702	2.04143	-0.805144	-1.56061	0.0098	0.094963	no
gene:FBgn0027603	gene:FBgn0027603	Ulp1	X:19202102-19208187	Control	HA	OK	15.7863	19.3587	0.294313	1.47643	0.0098	0.094963	no
gene:FBgn0032919	gene:FBgn0032919	CG9253	2L:21143228-21148546	Control	HA	OK	36.8926	50.5622	0.454728	1.48676	0.0098	0.094963	no
gene:FBgn0013685	gene:FBgn0013685	mt:ND6	mitochondrion_genome:9970-10495	Control	HA	OK	15.1828	10.5171	-0.529708	-1.62329	0.00985	0.095035	no
gene:FBgn0024196	gene:FBgn0024196	robl	2R:17456471-17457129	Control	HA	OK	230.831	188.917	-0.289086	-1.44744	0.00985	0.095035	no
gene:FBgn0027567	gene:FBgn0027567	CG8108	3L:9864638-9870674	Control	HA	OK	43.427	53.2576	0.294394	1.48002	0.00985	0.095035	no
gene:FBgn0031940	gene:FBgn0031940	CG7214	2L:7743681-7744839	Control	HA	OK	383.053	306.818	-0.320164	-1.53126	0.00985	0.095035	no
gene:FBgn0051301	gene:FBgn0051301	CG31301	3R:15346204-15348012	Control	HA	OK	35.8404	44.3421	0.30709	1.50249	0.00985	0.095035	no
gene:FBgn0015799	gene:FBgn0015799	Rbf	X:797089-801479	Control	HA	OK	21.1581	26.0575	0.30049	1.50592	0.0099	0.095435	no
gene:FBgn0263780	gene:FBgn0263780	CG17684	2R:1866079-2262115	Control	HA	OK	2.43582	1.72038	-0.501676	-1.54083	0.00995	0.0958342	no
gene:FBgn0001994	gene:FBgn0001994	crp	2L:16263555-16287730	Control	HA	OK	17.1879	21.2399	0.305383	1.52484	0.01	0.0960671	no
gene:FBgn0032088	gene:FBgn0032088	CG13102	2L:9012187-9014149	Control	HA	OK	22.77	16.1423	-0.496286	-1.49642	0.01	0.0960671	no
gene:FBgn0034160	gene:FBgn0034160	CG5550	2R:16816588-16819240	Control	HA	OK	5.2441	9.54306	0.863757	1.55031	0.01	0.0960671	no
gene:FBgn0000352	gene:FBgn0000352	cos	2R:7382175-7387115	Control	HA	OK	6.93806	8.65549	0.319082	1.47336	0.01005	0.0963816	no
gene:FBgn0032287	gene:FBgn0032287	CG6415	2L:10701939-10709453	Control	HA	OK	21.3484	16.6089	-0.362167	-1.5381	0.01005	0.0963816	no
gene:FBgn0029608	gene:FBgn0029608	CG3091	X:2252331-2254197	Control	HA	OK	60.1883	48.7012	-0.305524	-1.49035	0.01015	0.0970072	no
gene:FBgn0030503	gene:FBgn0030503	Tango2	X:13616988-13619207	Control	HA	OK	32.076	25.5538	-0.327954	-1.48684	0.01015	0.0970072	no
gene:FBgn0032253	gene:FBgn0032253	LManI	2L:10452676-10457241	Control	HA	OK	7.32106	5.75537	-0.347144	-1.47333	0.01015	0.0970072	no
gene:FBgn0032397	gene:FBgn0032397	Tom70	2L:12034189-12038511	Control	HA	OK	14.0217	17.6902	0.335288	1.47862	0.01015	0.0970072	no
gene:FBgn0036814	gene:FBgn0036814	CG14073	3L:18802264-18820675	Control	HA	OK	5.88648	7.25981	0.302526	1.48195	0.0102	0.0973185	no
gene:FBgn0040056	gene:FBgn0040056	CG17698	3L:23737959-23749058	Control	HA	OK	65.6491	53.2289	-0.302565	-1.47977	0.0102	0.0973185	no
gene:FBgn0030347	gene:FBgn0030347	CG15739	X:11873318-11877168	Control	HA	OK	17.4721	13.2374	-0.400436	-1.47929	0.0103	0.0981049	no
gene:FBgn0036360	gene:FBgn0036360	CG10713	3L:13428838-13435229	Control	HA	OK	0.787203	0.444177	-0.825602	-1.5235	0.0103	0.0981049	no
gene:FBgn0034795	gene:FBgn0034795	MED23	2R:22888927-22894425	Control	HA	OK	2.68373	3.46648	0.369228	1.46986	0.01035	0.0984971	no
gene:FBgn0014184	gene:FBgn0014184	Oda	2R:12166294-12174264	Control	HA	OK	1022.54	785.641	-0.380208	-1.50441	0.0104	0.0985528	no
gene:FBgn0051619	gene:FBgn0051619	nolo	2L:21684105-21729051	Control	HA	OK	3.72537	2.8857	-0.368463	-1.46299	0.0104	0.0985528	no
gene:FBgn0250868	gene:FBgn0250868	CG42239	2R:17572828-17573330	Control	HA	OK	81.4867	64.4642	-0.338067	-1.56683	0.0104	0.0985528	no
gene:FBgn0259152	gene:FBgn0259152	Clbn	3R:25127501-25131155	Control	HA	OK	15.189	18.7515	0.303982	1.4962	0.0104	0.0985528	no
gene:FBgn0264816	gene:FBgn0264816	koko	3R:18403025-18404726	Control	HA	OK	24.0414	30.4005	0.338572	1.49303	0.0104	0.0985528	no
gene:FBgn0015834	gene:FBgn0015834	eIF3i	2L:4965672-4967775	Control	HA	OK	193.695	242.123	0.321948	1.5071	0.01045	0.0988588	no
gene:FBgn0038917	gene:FBgn0038917	CG6678	3R:21885675-21907182	Control	HA	OK	4.47795	3.25737	-0.459133	-1.47557	0.01045	0.0988588	no
gene:FBgn0010660	gene:FBgn0010660	Nup214	2R:22918936-22924742	Control	HA	OK	7.99885	9.85782	0.301477	1.46923	0.0105	0.0989962	no
gene:FBgn0011474	gene:FBgn0011474	PR-Set7	3R:14316037-14326689	Control	HA	OK	12.8405	16.7786	0.385918	1.47506	0.0105	0.0989962	no
gene:FBgn0030159	gene:FBgn0030159	CG9689	X:9881952-9883670	Control	HA	OK	13.3534	8.62321	-0.630911	-1.53301	0.0105	0.0989962	no
gene:FBgn0031052	gene:FBgn0031052	CG14215	X:19652304-19659407	Control	HA	OK	5.41676	6.72811	0.312772	1.45873	0.0105	0.0989962	no
gene:FBgn0029167	gene:FBgn0029167	Hml	3L:13846053-13860001	Control	HA	OK	1.91755	1.50058	-0.353746	-1.48126	0.01055	0.0992162	no
gene:FBgn0041188	gene:FBgn0041188	Atx2	3R:15408422-15417277	Control	HA	OK	18.5324	22.711	0.293339	1.45705	0.01055	0.0992162	no
gene:FBgn0086446	gene:FBgn0086446	DCTN6-p27	2L:19132322-19181702	Control	HA	OK	67.5153	40.6726	-0.731158	-1.49753	0.01055	0.0992162	no
gene:FBgn0028945	gene:FBgn0028945	CG7631	2L:15628677-15629552	Control	HA	OK	5.6398	3.73806	-0.593355	-1.50583	0.0106	0.0995188	no
gene:FBgn0262987	gene:FBgn0262987	CG43295	3L:16105851-16106428	Control	HA	OK	23.1626	16.2356	-0.51263	-1.49691	0.0106	0.0995188	no
gene:FBgn0051706	gene:FBgn0051706	CG31706	2L:11529037-11531052	Control	HA	OK	7.09132	4.9688	-0.513155	-1.48811	0.01065	0.0998203	no
gene:FBgn0259749	gene:FBgn0259749	mmy	2L:6468537-6473904	Control	HA	OK	40.9112	33.3013	-0.296916	-1.46846	0.01065	0.0998203	no
gene:FBgn0000463	gene:FBgn0000463	Dl	3R:19302730-19326217	Control	HA	OK	4.34405	5.49512	0.339112	1.50238	0.0107	0.100205	no
gene:FBgn0016076	gene:FBgn0016076	vri	2L:5288943-5311223	Control	HA	OK	8.79425	6.91032	-0.347808	-1.51372	0.01075	0.10042	no
gene:FBgn0028526	gene:FBgn0028526	CG15293	2L:14104089-14160587	Control	HA	OK	132.606	104.393	-0.345127	-1.46434	0.01075	0.10042	no
gene:FBgn0261538	gene:FBgn0261538	CG42662	2R:15698725-15701696	Control	HA	OK	25.1968	17.4137	-0.533018	-1.53122	0.01075	0.10042	no
gene:FBgn0027525	gene:FBgn0027525	LTV1	2R:10836569-10838727	Control	HA	OK	80.5278	98.7923	0.294912	1.46019	0.01085	0.100932	no
gene:FBgn0032638	gene:FBgn0032638	SPH93	2L:17452923-17458775	Control	HA	OK	5.74085	3.04895	-0.91295	-2.03269	0.01085	0.100932	no
gene:FBgn0033520	gene:FBgn0033520	Prx2540-1	2R:10424435-10425471	Control	HA	OK	27.2889	20.9006	-0.384772	-1.51217	0.01085	0.100932	no
gene:FBgn0037379	gene:FBgn0037379	CG10979	3R:5794704-5799994	Control	HA	OK	8.72431	11.1975	0.360068	1.45159	0.01085	0.100932	no
gene:FBgn0038353	gene:FBgn0038353	CG5399	3R:15695240-15697142	Control	HA	OK	149.226	121.261	-0.299383	-1.47575	0.01085	0.100932	no
gene:FBgn0011703	gene:FBgn0011703	RnrL	2L:10325025-10327943	Control	HA	OK	67.8051	83.2573	0.296183	1.4646	0.01095	0.101778	no
gene:FBgn0051324	gene:FBgn0051324	CG31324	3R:26106867-26130674	Control	HA	OK	35.3258	27.75	-0.348236	-1.49958	0.011	0.102157	no
gene:FBgn0028886	gene:FBgn0028886	CG15279	2L:14844992-14851749	Control	HA	OK	13.629	10.9271	-0.318777	-1.46722	0.0111	0.103	no
gene:FBgn0000500	gene:FBgn0000500	Dsk	3R:4186962-4196210	Control	HA	OK	11.6975	7.46338	-0.648303	-1.48984	0.0112	0.103842	no
gene:FBgn0013981	gene:FBgn0013981	His4r	3R:14625754-14626614	Control	HA	OK	1450.5	1172.78	-0.306615	-1.45648	0.01125	0.10396	no
gene:FBgn0037561	gene:FBgn0037561	CG9630	3R:8267942-8269896	Control	HA	OK	11.7314	14.8489	0.339979	1.46973	0.01125	0.10396	no
gene:FBgn0039175	gene:FBgn0039175	beta-PheRS	3R:24250459-24252679	Control	HA	OK	36.6533	44.9638	0.294822	1.45806	0.01125	0.10396	no
gene:FBgn0050154	gene:FBgn0050154	CG30154	2R:20533358-20533934	Control	HA	OK	14.1073	9.72512	-0.536649	-1.52275	0.01125	0.10396	no
gene:FBgn0051636	gene:FBgn0051636	CG31636	2L:6656458-6658152	Control	HA	OK	6.09638	4.29869	-0.504056	-1.48597	0.01135	0.104711	no
gene:FBgn0085452	gene:FBgn0085452	CG34423	2R:23357659-23359204	Control	HA	OK	130.965	163.94	0.323978	1.44965	0.01135	0.104711	no
gene:FBgn0030731	gene:FBgn0030731	Mfe2	X:16267006-16276180	Control	HA	OK	74.5123	57.0147	-0.386145	-1.4876	0.0114	0.104999	no
gene:FBgn0034641	gene:FBgn0034641	mahj	2R:21625029-21634362	Control	HA	OK	9.305	11.7015	0.330619	1.45317	0.0114	0.104999	no
gene:FBgn0001233	gene:FBgn0001233	Hsp83	3L:3192968-3197631	Control	HA	OK	732.241	935.936	0.354091	1.44032	0.01145	0.105199	no
gene:FBgn0023143	gene:FBgn0023143	Uba1	2R:9688288-9693328	Control	HA	OK	75.8916	93.2862	0.297723	1.44188	0.01145	0.105199	no
gene:FBgn0034920	gene:FBgn0034920	CG5597	2R:23886972-23890276	Control	HA	OK	113.232	86.5281	-0.388045	-1.48534	0.01145	0.105199	no
gene:FBgn0031245	gene:FBgn0031245	CG3625	2L:283384-291795	Control	HA	OK	62.7801	49.8084	-0.333918	-1.46222	0.0115	0.105398	no
gene:FBgn0036374	gene:FBgn0036374	Spt20	3L:13502706-13511541	Control	HA	OK	3.84753	4.80106	0.319421	1.45894	0.0115	0.105398	no
gene:FBgn0050049	gene:FBgn0050049	CG30049	2R:12355670-12359087	Control	HA	OK	0.826808	0.524657	-0.656178	-1.45233	0.0115	0.105398	no
gene:FBgn0026147	gene:FBgn0026147	CG16833	2L:10989400-11001476	Control	HA	OK	17.1509	22.7287	0.406225	1.45871	0.01155	0.105682	no
gene:FBgn0052751	gene:FBgn0052751	CG32751	X:6196579-6198654	Control	HA	OK	14.8567	11.8119	-0.33088	-1.47365	0.01155	0.105682	no
gene:FBgn0010019	gene:FBgn0010019	Cyp4g1	X:268508-470726	Control	HA	OK	1097.29	1437.79	0.389917	1.43729	0.0116	0.10588	no
gene:FBgn0035147	gene:FBgn0035147	Gale	3L:648554-651311	Control	HA	OK	121.945	100.326	-0.281535	-1.41839	0.0116	0.10588	no
gene:FBgn0262028	gene:FBgn0262028	CR42839	3R:16004320-16008073	Control	HA	OK	1.14752	0.73078	-0.651006	-1.51674	0.0116	0.10588	no
gene:FBgn0000140	gene:FBgn0000140	asp	3R:24753848-24760513	Control	HA	OK	10.9892	13.4681	0.293459	1.44839	0.01165	0.105903	no
gene:FBgn0035871	gene:FBgn0035871	BI-1	3L:8307144-8308941	Control	HA	OK	166.776	136.349	-0.290611	-1.4603	0.01165	0.105903	no
gene:FBgn0036775	gene:FBgn0036775	CG5147	3L:18107847-18109574	Control	HA	OK	21.6386	27.0048	0.319604	1.45021	0.01165	0.105903	no
gene:FBgn0260987	gene:FBgn0260987	vtd	3L:27136524-27157999	Control	HA	OK	52.5801	43.1605	-0.284804	-1.45887	0.01165	0.105903	no
gene:FBgn0261574	gene:FBgn0261574	kug	3L:20005300-20024607	Control	HA	OK	3.15234	3.86735	0.294922	1.46968	0.01165	0.105903	no
gene:FBgn0031106	gene:FBgn0031106	Syx16	X:20391446-20393751	Control	HA	OK	48.5916	36.4896	-0.413222	-1.45441	0.0117	0.106271	no
gene:FBgn0001978	gene:FBgn0001978	stc	2L:15113479-15118069	Control	HA	OK	23.8166	29.2637	0.297143	1.47674	0.01175	0.106465	no
gene:FBgn0032429	gene:FBgn0032429	CG5446	2L:12426630-12427709	Control	HA	OK	57.6756	72.5024	0.330066	1.50965	0.01175	0.106465	no
gene:FBgn0034580	gene:FBgn0034580	Cht8	2R:21061645-21064986	Control	HA	OK	20.9294	16.6374	-0.331097	-1.47191	0.01175	0.106465	no
gene:FBgn0022023	gene:FBgn0022023	eIF3h	2L:5051192-5054575	Control	HA	OK	215.734	267.309	0.309252	1.46385	0.0118	0.106486	no
gene:FBgn0025742	gene:FBgn0025742	mtm	2L:6034730-6037902	Control	HA	OK	33.829	27.1767	-0.315887	-1.45377	0.0118	0.106486	no
gene:FBgn0029979	gene:FBgn0029979	mahe	X:7922157-7931382	Control	HA	OK	9.7842	12.0726	0.303206	1.50205	0.0118	0.106486	no
gene:FBgn0030151	gene:FBgn0030151	CG1354	X:9778741-9782094	Control	HA	OK	105.885	129.914	0.295063	1.45315	0.0118	0.106486	no
gene:FBgn0033100	gene:FBgn0033100	CG3420	2R:6749226-6757209	Control	HA	OK	269.141	183.411	-0.553286	-1.45351	0.0118	0.106486	no
gene:FBgn0036333	gene:FBgn0036333	MICAL-like	3L:13011975-13015332	Control	HA	OK	13.8676	17.0295	0.296318	1.46535	0.01185	0.106679	no
gene:FBgn0038810	gene:FBgn0038810	Srp72	3R:20588710-20592671	Control	HA	OK	23.6732	30.3552	0.358687	1.45955	0.01185	0.106679	no
gene:FBgn0040730	gene:FBgn0040730	CG15127	2R:19680767-19681391	Control	HA	OK	3.1892	1.73986	-0.874224	-1.52216	0.01185	0.106679	no
gene:FBgn0001220	gene:FBgn0001220	Hsc70-5	2R:14252597-14256192	Control	HA	OK	78.7551	96.4309	0.292123	1.44001	0.0119	0.107042	no
gene:FBgn0032116	gene:FBgn0032116	Mco1	2L:9416587-9426342	Control	HA	OK	5.65538	4.43775	-0.349798	-1.43769	0.01195	0.107319	no
gene:FBgn0261597	gene:FBgn0261597	RpS26	2L:18441334-18443277	Control	HA	OK	2944.7	3791.29	0.364566	1.48303	0.01195	0.107319	no
gene:FBgn0026722	gene:FBgn0026722	drosha	2R:7932428-7936840	Control	HA	OK	6.9575	8.61644	0.308523	1.42207	0.012	0.107682	no
gene:FBgn0000246	gene:FBgn0000246	c(3)G	3R:15788520-15792579	Control	HA	OK	33.7476	41.3459	0.292959	1.51744	0.01205	0.108043	no
gene:FBgn0087039	gene:FBgn0087039	Sbp2	3L:8304156-8305325	Control	HA	OK	26.8442	33.7949	0.332194	1.46071	0.0121	0.108405	no
gene:FBgn0053155	gene:FBgn0053155	CG33155	2R:13943386-13958089	Control	HA	OK	136.213	68.4048	-0.993698	-1.57914	0.01215	0.108678	no
gene:FBgn0053977	gene:FBgn0053977	CG33977	3R:13402558-13403051	Control	HA	OK	26.125	20.2827	-0.365187	-1.45976	0.01215	0.108678	no
gene:FBgn0027587	gene:FBgn0027587	CG7028	3L:206133-211457	Control	HA	OK	12.4865	15.9044	0.349056	1.46342	0.0122	0.108864	no
gene:FBgn0031904	gene:FBgn0031904	CG5149	2L:7384485-7388253	Control	HA	OK	37.1556	30.4592	-0.286699	-1.42668	0.0122	0.108864	no
gene:FBgn0035955	gene:FBgn0035955	CG5194	3L:9008623-9009838	Control	HA	OK	38.5638	47.8938	0.31259	1.47407	0.0122	0.108864	no
gene:FBgn0033873	gene:FBgn0033873	CG6337	2R:13833574-13835096	Control	HA	OK	9.54905	6.99008	-0.450048	-1.47208	0.01225	0.109135	no
gene:FBgn0042627	gene:FBgn0042627	FASN2	2L:3043946-3056143	Control	HA	OK	20.3545	24.836	0.287084	1.44295	0.01225	0.109135	no
gene:FBgn0028647	gene:FBgn0028647	CG11902	3R:25335256-25340088	Control	HA	OK	3.70276	4.70856	0.346684	1.4377	0.01235	0.109676	no
gene:FBgn0032216	gene:FBgn0032216	Usp14	2L:10312264-10314396	Control	HA	OK	75.9004	92.5079	0.285469	1.43303	0.01235	0.109676	no
gene:FBgn0039778	gene:FBgn0039778	Jon99Fi	3R:30488962-30489895	Control	HA	OK	416.705	339.007	-0.297712	-1.50466	0.01235	0.109676	no
gene:FBgn0266590	gene:FBgn0266590	CR45115	3L:6865448-6866439	Control	HA	OK	2.03004	1.1677	-0.797831	-1.5436	0.01235	0.109676	no
gene:FBgn0030260	gene:FBgn0030260	CG1537	X:11062026-11063170	Control	HA	OK	2.36333	1.37834	-0.777891	-1.50852	0.0124	0.109771	no
gene:FBgn0032524	gene:FBgn0032524	CG9267	2L:13415430-13500427	Control	HA	OK	32.7446	24.9336	-0.393166	-1.45797	0.0124	0.109771	no
gene:FBgn0053852	gene:FBgn0053852	His1:CG33852	2L:21516772-21517795	Control	HA	OK	4.98355	7.49364	0.588494	1.51597	0.0124	0.109771	no
gene:FBgn0085273	gene:FBgn0085273	CG34244	3L:14235052-14235941	Control	HA	OK	5.46629	2.34224	-1.22267	-1.5769	0.0124	0.109771	no
gene:FBgn0020392	gene:FBgn0020392	Nmt	3L:8176134-8178429	Control	HA	OK	57.6158	70.3257	0.287586	1.44193	0.01245	0.110126	no
gene:FBgn0039864	gene:FBgn0039864	CG11550	3R:31678146-31679880	Control	HA	OK	11.0798	7.98671	-0.472257	-1.46954	0.01255	0.110835	no
gene:FBgn0054010	gene:FBgn0054010	CG34010	2L:8009602-8010652	Control	HA	OK	3.50029	2.2434	-0.641787	-1.44353	0.01255	0.110835	no
gene:FBgn0030984	gene:FBgn0030984	tgy	X:19125002-19127316	Control	HA	OK	4.16088	2.79184	-0.575672	-1.4778	0.0126	0.110926	no
gene:FBgn0033308	gene:FBgn0033308	CG8736	2R:8594030-8595001	Control	HA	OK	64.5224	82.0702	0.347058	1.49574	0.0126	0.110926	no
gene:FBgn0035798	gene:FBgn0035798	frac	3L:7562609-7569499	Control	HA	OK	0.845162	1.21535	0.524076	1.45987	0.0126	0.110926	no
gene:FBgn0042129	gene:FBgn0042129	OS9	2L:19964044-19966510	Control	HA	OK	57.6933	39.7162	-0.538675	-1.44074	0.0126	0.110926	no
gene:FBgn0030670	gene:FBgn0030670	Pis	X:15701450-15703770	Control	HA	OK	62.0262	50.9013	-0.285176	-1.4308	0.01265	0.111191	no
gene:FBgn0033320	gene:FBgn0033320	CG8586	2R:8691447-8696245	Control	HA	OK	33.6008	23.9469	-0.488658	-1.44432	0.01265	0.111191	no
gene:FBgn0052698	gene:FBgn0052698	CG32698	X:9783222-9855449	Control	HA	OK	8.92526	6.68886	-0.416135	-1.44022	0.0127	0.111454	no
gene:FBgn0259239	gene:FBgn0259239	CG42337	3L:21183312-21193363	Control	HA	OK	2.72873	2.10009	-0.377775	-1.40314	0.0127	0.111454	no
gene:FBgn0000810	gene:FBgn0000810	fs(1)K10	X:2242137-2246041	Control	HA	OK	13.7955	16.9678	0.298597	1.45525	0.01275	0.111455	no
gene:FBgn0028387	gene:FBgn0028387	chm	2L:7412416-7422736	Control	HA	OK	9.0252	11.416	0.33903	1.47194	0.01275	0.111455	no
gene:FBgn0035726	gene:FBgn0035726	CG9953	3L:6969657-6972467	Control	HA	OK	97.0286	118.889	0.293136	1.45374	0.01275	0.111455	no
gene:FBgn0039911	gene:FBgn0039911	CG1909	4:583107-589348	Control	HA	OK	6.1311	4.74832	-0.368729	-1.45801	0.01275	0.111455	no
gene:FBgn0040793	gene:FBgn0040793	CG7630	3L:17425476-17426282	Control	HA	OK	2892.8	2342.96	-0.304133	-1.42442	0.01275	0.111455	no
gene:FBgn0032162	gene:FBgn0032162	CG4592	2L:9921632-9924865	Control	HA	OK	74.6424	60.9746	-0.291788	-1.42744	0.0128	0.111717	no
gene:FBgn0033302	gene:FBgn0033302	Cyp6a14	2R:8564186-8567202	Control	HA	OK	3.31678	2.25709	-0.555323	-1.41429	0.0128	0.111717	no
gene:FBgn0033998	gene:FBgn0033998	row	2R:15206526-15213634	Control	HA	OK	14.8939	18.4358	0.307786	1.42587	0.01285	0.112066	no
gene:FBgn0039068	gene:FBgn0039068	CG13827	3R:23258364-23260602	Control	HA	OK	22.4084	17.1235	-0.388057	-1.44316	0.0129	0.112414	no
gene:FBgn0034822	gene:FBgn0034822	RpL37b	2R:23100056-23100478	Control	HA	OK	2.21447	0.773795	-1.51694	-1.55303	0.01295	0.112762	no
gene:FBgn0053080	gene:FBgn0053080	CG33080	X:5698556-5717778	Control	HA	OK	22.7186	18.1792	-0.321586	-1.42817	0.013	0.113109	no
gene:FBgn0031461	gene:FBgn0031461	daw	2L:2805260-2812376	Control	HA	OK	15.0702	12.0571	-0.321818	-1.43694	0.01305	0.113279	no
gene:FBgn0053906	gene:FBgn0053906	His2B:CG33906	2L:21433121-21433716	Control	HA	OK	5.11407	2.83377	-0.851747	-1.52991	0.01305	0.113279	no
gene:FBgn0266354	gene:FBgn0266354	CG45002	X:16969068-17066732	Control	HA	OK	1.75907	1.34409	-0.388179	-1.46405	0.01305	0.113279	no
gene:FBgn0026196	gene:FBgn0026196	nop5	2L:6914300-6920210	Control	HA	OK	131.048	168.549	0.363073	1.43034	0.01315	0.114059	no
gene:FBgn0262815	gene:FBgn0262815	CR43186	2R:15375833-15376481	Control	HA	OK	7.90968	5.32045	-0.57207	-1.4719	0.0132	0.114226	no
gene:FBgn0264326	gene:FBgn0264326	DNApol-epsilon255	3R:23348127-23355163	Control	HA	OK	3.50792	4.37666	0.319213	1.412	0.0132	0.114226	no
gene:FBgn0283437	gene:FBgn0283437	PPO1	2R:17873938-17926695	Control	HA	OK	3.19498	2.09701	-0.607471	-1.47599	0.0132	0.114226	no
gene:FBgn0010387	gene:FBgn0010387	Dbi	3L:7131862-7133463	Control	HA	OK	1110.57	912.333	-0.283667	-1.41681	0.01325	0.114393	no
gene:FBgn0035743	gene:FBgn0035743	CG15829	3L:7128902-7129673	Control	HA	OK	15.6195	9.38807	-0.734444	-1.47535	0.01325	0.114393	no
gene:FBgn0040734	gene:FBgn0040734	CG15065	2R:18389958-18390242	Control	HA	OK	144.946	106.987	-0.438077	-1.51979	0.01325	0.114393	no
gene:FBgn0014127	gene:FBgn0014127	barr	2L:20058162-20061370	Control	HA	OK	11.9556	14.9726	0.324638	1.45078	0.0133	0.114647	no
gene:FBgn0033890	gene:FBgn0033890	Ctf4	2R:13980361-13983317	Control	HA	OK	11.6775	14.5126	0.313574	1.44362	0.0133	0.114647	no
gene:FBgn0010389	gene:FBgn0010389	htl	3R:18045215-18052984	Control	HA	OK	4.20668	3.23655	-0.378225	-1.43918	0.01335	0.114901	no
gene:FBgn0039685	gene:FBgn0039685	Obp99b	3R:29716253-29716896	Control	HA	OK	100.094	125.132	0.322095	1.47908	0.01335	0.114901	no
gene:FBgn0035901	gene:FBgn0035901	CG6745	3L:8510002-8518738	Control	HA	OK	7.62156	9.94461	0.383827	1.41985	0.0134	0.115242	no
gene:FBgn0029820	gene:FBgn0029820	CG16721	X:5879868-5899989	Control	HA	OK	47.2001	38.5356	-0.2926	-1.4138	0.01345	0.115583	no
gene:FBgn0032224	gene:FBgn0032224	Sps2	2L:10342593-10344223	Control	HA	OK	60.4147	49.5202	-0.286882	-1.42996	0.0135	0.115657	no
gene:FBgn0036022	gene:FBgn0036022	CG8329	3L:9631833-9679103	Control	HA	OK	146.764	99.4934	-0.560825	-1.45306	0.0135	0.115657	no
gene:FBgn0036262	gene:FBgn0036262	CG6910	3L:12184983-12187860	Control	HA	OK	79.791	65.6973	-0.280393	-1.39877	0.0135	0.115657	no
gene:FBgn0041604	gene:FBgn0041604	dlp	3L:14632600-14671609	Control	HA	OK	8.25154	10.1475	0.298394	1.4238	0.0135	0.115657	no
gene:FBgn0026427	gene:FBgn0026427	Su(var)2-HP2	2R:14607153-14618118	Control	HA	OK	4.6226	5.86009	0.342218	1.4398	0.0137	0.11719	no
gene:FBgn0035334	gene:FBgn0035334	CG8993	3L:2372198-2373704	Control	HA	OK	242.05	187.409	-0.369111	-1.42988	0.0137	0.11719	no
gene:FBgn0000044	gene:FBgn0000044	Act57B	2R:20944020-20946431	Control	HA	OK	495.543	619.066	0.321084	1.4748	0.01375	0.117348	no
gene:FBgn0015283	gene:FBgn0015283	Rpn10	3L:21536999-21538582	Control	HA	OK	118.772	144.377	0.281652	1.40878	0.01375	0.117348	no
gene:FBgn0250753	gene:FBgn0250753	kra	3R:5595363-5601136	Control	HA	OK	374.774	468.876	0.323185	1.43595	0.01375	0.117348	no
gene:FBgn0038681	gene:FBgn0038681	Cyp12a4	3R:19135157-19137136	Control	HA	OK	83.7066	68.9952	-0.278845	-1.40942	0.0138	0.117685	no
gene:FBgn0033249	gene:FBgn0033249	CG11191	2R:8000489-8002120	Control	HA	OK	4.36849	2.8816	-0.600267	-1.42751	0.01385	0.117931	no
gene:FBgn0262565	gene:FBgn0262565	CR43105	2R:15374845-15375702	Control	HA	OK	18.9724	14.5801	-0.3799	-1.42707	0.01385	0.117931	no
gene:FBgn0033592	gene:FBgn0033592	CG13215	2R:11239493-11240114	Control	HA	OK	1.38189	2.87759	1.05821	1.54474	0.01395	0.118692	no
gene:FBgn0038609	gene:FBgn0038609	Nup43	3R:18366637-18367913	Control	HA	OK	46.681	38.0711	-0.294142	-1.40191	0.014	0.118846	no
gene:FBgn0260653	gene:FBgn0260653	serp	3L:19700976-19708015	Control	HA	OK	13.9009	17.3458	0.319409	1.39993	0.014	0.118846	no
gene:FBgn0264439	gene:FBgn0264439	CR43857	2L:7423819-7425932	Control	HA	OK	0.32337	0.757572	1.2282	1.33548	0.014	0.118846	no
gene:FBgn0011710	gene:FBgn0011710	2019-09-01	X:21358285-21361688	Control	HA	OK	40.1165	48.6105	0.277075	1.39974	0.01405	0.119089	no
gene:FBgn0026175	gene:FBgn0026175	SkpC	X:19816071-19816700	Control	HA	OK	39.456	50.263	0.349253	1.43372	0.01405	0.119089	no
gene:FBgn0027582	gene:FBgn0027582	CG6230	2L:11114013-11120319	Control	HA	OK	11.3654	13.8143	0.281513	1.38919	0.0141	0.119332	no
gene:FBgn0038146	gene:FBgn0038146	CG9799	3R:13385647-13388709	Control	HA	OK	11.2028	13.8203	0.302936	1.41923	0.0141	0.119332	no
gene:FBgn0028993	gene:FBgn0028993	scro	3L:24724161-24758036	Control	HA	OK	4.94114	3.56188	-0.472206	-1.44825	0.01425	0.120236	no
gene:FBgn0032981	gene:FBgn0032981	CG3635	2L:22175414-22183991	Control	HA	OK	4.10301	2.86832	-0.516478	-1.4456	0.01425	0.120236	no
gene:FBgn0040060	gene:FBgn0040060	yip7	3L:6035215-6036175	Control	HA	OK	3092.78	2416.05	-0.356256	-1.46097	0.01425	0.120236	no
gene:FBgn0266702	gene:FBgn0266702	CR45192	3R:5830061-5838782	Control	HA	OK	26.2358	18.3443	-0.516202	-1.41494	0.01425	0.120236	no
gene:FBgn0028482	gene:FBgn0028482	bdl	2L:4324553-4331830	Control	HA	OK	24.923	20.3631	-0.291518	-1.42323	0.0143	0.120567	no
gene:FBgn0031947	gene:FBgn0031947	CG7154	2L:7782864-7786061	Control	HA	OK	16.5601	20.3013	0.293861	1.40154	0.01435	0.120897	no
gene:FBgn0037026	gene:FBgn0037026	CG3634	3L:20806867-20809272	Control	HA	OK	10.5603	13.3061	0.333431	1.41468	0.0144	0.121227	no
gene:FBgn0002783	gene:FBgn0002783	mor	3R:15965445-15972913	Control	HA	OK	28.6244	35.5732	0.313547	1.41432	0.01445	0.121556	no
gene:FBgn0030976	gene:FBgn0030976	CG7378	X:18900409-18911843	Control	HA	OK	85.9673	70.4465	-0.287259	-1.42743	0.0145	0.121885	no
gene:FBgn0020305	gene:FBgn0020305	dbe	2L:868672-869857	Control	HA	OK	45.2094	36.6481	-0.302886	-1.3985	0.0146	0.122541	no
gene:FBgn0033507	gene:FBgn0033507	CG12909	2R:10310112-10311143	Control	HA	OK	44.8257	55.3603	0.304526	1.40731	0.0146	0.122541	no
gene:FBgn0036918	gene:FBgn0036918	Pfdn6	3L:19923670-19924688	Control	HA	OK	192.709	157.75	-0.28878	-1.41588	0.01475	0.123707	no
gene:FBgn0086362	gene:FBgn0086362	spn-F	3R:31255126-31256659	Control	HA	OK	35.6196	43.8495	0.299889	1.41797	0.0148	0.124033	no
gene:FBgn0015372	gene:FBgn0015372	RabX1	2R:23519838-23523613	Control	HA	OK	31.0116	25.2032	-0.299202	-1.39398	0.01485	0.124173	no
gene:FBgn0030242	gene:FBgn0030242	sofe	X:10854999-10857413	Control	HA	OK	10.6356	13.7075	0.366067	1.42497	0.01485	0.124173	no
gene:FBgn0031034	gene:FBgn0031034	CG14205	X:19592608-19595548	Control	HA	OK	11.7234	9.40518	-0.317858	-1.36073	0.01485	0.124173	no
gene:FBgn0005619	gene:FBgn0005619	Hdc	2R:10237743-10247560	Control	HA	OK	3.35669	2.50029	-0.424939	-1.39389	0.015	0.124402	no
gene:FBgn0024177	gene:FBgn0024177	zpg	3L:6603683-6608739	Control	HA	OK	56.3189	72.0315	0.35501	1.40601	0.015	0.124402	no
gene:FBgn0030510	gene:FBgn0030510	CG12177	X:13677898-13680500	Control	HA	OK	38.522	30.046	-0.358509	-1.44114	0.015	0.124402	no
gene:FBgn0030797	gene:FBgn0030797	CG13004	X:16826680-16835520	Control	HA	OK	4.85591	7.62353	0.650717	1.46882	0.015	0.124402	no
gene:FBgn0031832	gene:FBgn0031832	CG9596	2L:6559425-6562289	Control	HA	OK	10.1643	13.0102	0.35614	1.38608	0.0149	0.124402	no
gene:FBgn0034552	gene:FBgn0034552	CG17999	2R:20847979-20849939	Control	HA	OK	2.20004	3.20567	0.543098	1.39523	0.0149	0.124402	no
gene:FBgn0036574	gene:FBgn0036574	elg1	3L:16132027-16164701	Control	HA	OK	11.8578	16.2852	0.457724	1.40425	0.01495	0.124402	no
gene:FBgn0037012	gene:FBgn0037012	Rcd2	3L:20527971-20540417	Control	HA	OK	13.557	10.9438	-0.308922	-1.40455	0.015	0.124402	no
gene:FBgn0038469	gene:FBgn0038469	CG4009	3R:17033587-17036045	Control	HA	OK	51.6169	42.4425	-0.282333	-1.39168	0.015	0.124402	no
gene:FBgn0051961	gene:FBgn0051961	TBCC	2L:4186249-4187793	Control	HA	OK	17.2784	21.7258	0.330438	1.39995	0.015	0.124402	no
gene:FBgn0262976	gene:FBgn0262976	lawc	X:8408007-8433011	Control	HA	OK	16.8456	10.7109	-0.653291	-1.42824	0.015	0.124402	no
gene:FBgn0024733	gene:FBgn0024733	RpL10	3L:23093189-23095471	Control	HA	OK	2621.11	3349.46	0.353751	1.43447	0.0151	0.125138	no
gene:FBgn0035951	gene:FBgn0035951	CG5068	3L:8986709-8990228	Control	HA	OK	33.8515	27.5085	-0.299343	-1.39865	0.0152	0.125874	no
gene:FBgn0027590	gene:FBgn0027590	GstE12	2R:24763166-24768172	Control	HA	OK	246.634	202.48	-0.28459	-1.4048	0.01525	0.126007	no
gene:FBgn0051030	gene:FBgn0051030	CG31030	3R:30164691-30166419	Control	HA	OK	23.0287	18.716	-0.299164	-1.38133	0.01525	0.126007	no
gene:FBgn0267029	gene:FBgn0267029	CR45473	X:140972-142197	Control	HA	OK	6.85077	4.61936	-0.568573	-1.50305	0.01525	0.126007	no
gene:FBgn0028473	gene:FBgn0028473	Non1	2R:9396264-9398734	Control	HA	OK	217.778	265.805	0.287515	1.38202	0.0154	0.126965	no
gene:FBgn0036754	gene:FBgn0036754	CG5589	3L:17802489-17804715	Control	HA	OK	11.9628	14.9019	0.316949	1.38872	0.0154	0.126965	no
gene:FBgn0267497	gene:FBgn0267497	28SrRNA:CR45837	rDNA:42622-49485	Control	HA	OK	164.985	121.711	-0.438866	-1.44228	0.0154	0.126965	no
gene:FBgn0001987	gene:FBgn0001987	Gli	2L:15756001-15762758	Control	HA	OK	5.40933	4.3396	-0.317889	-1.38524	0.01545	0.127189	no
gene:FBgn0031390	gene:FBgn0031390	tho2	2L:2137349-2145187	Control	HA	OK	10.4354	12.7478	0.288761	1.40931	0.01545	0.127189	no
gene:FBgn0016756	gene:FBgn0016756	Usp47	3L:5752972-5761886	Control	HA	OK	22.77	27.6404	0.279649	1.40659	0.01555	0.127636	no
gene:FBgn0030018	gene:FBgn0030018	slpr	X:8165832-8177185	Control	HA	OK	10.6199	12.9985	0.291585	1.39188	0.01555	0.127636	no
gene:FBgn0030160	gene:FBgn0030160	CG9691	X:9884441-9885044	Control	HA	OK	219.417	180.938	-0.278181	-1.42481	0.01555	0.127636	no
gene:FBgn0038261	gene:FBgn0038261	CG14856	3R:14798985-14801163	Control	HA	OK	0.598244	0.32999	-0.858311	-1.42501	0.01555	0.127636	no
gene:FBgn0053816	gene:FBgn0053816	His1:CG33816	2L:21456112-21457135	Control	HA	OK	5.33953	7.85132	0.556222	1.45085	0.0156	0.127952	no
gene:FBgn0039519	gene:FBgn0039519	Cyp6a18	3R:27478674-27482904	Control	HA	OK	10.4405	8.07017	-0.371525	-1.40989	0.01565	0.128268	no
gene:FBgn0032078	gene:FBgn0032078	C1GalTA	2L:8943454-8951216	Control	HA	OK	24.3344	19.9455	-0.286931	-1.38444	0.01575	0.12871	no
gene:FBgn0034663	gene:FBgn0034663	CG4363	2R:21834229-21835047	Control	HA	OK	36.9649	28.9335	-0.353416	-1.39821	0.01575	0.12871	no
gene:FBgn0035162	gene:FBgn0035162	Sf3b3	3L:826719-833385	Control	HA	OK	46.433	58.5363	0.33418	1.38043	0.01575	0.12871	no
gene:FBgn0036560	gene:FBgn0036560	CG5895	3L:16035484-16037227	Control	HA	OK	5.30873	3.8397	-0.467373	-1.40303	0.01575	0.12871	no
gene:FBgn0031515	gene:FBgn0031515	CG9664	2L:3291244-3294706	Control	HA	OK	3.93612	2.99648	-0.393507	-1.39971	0.01595	0.130058	no
gene:FBgn0031759	gene:FBgn0031759	lid	2L:5989399-5999501	Control	HA	OK	11.6309	14.0907	0.276786	1.3882	0.01595	0.130058	no
gene:FBgn0032724	gene:FBgn0032724	CG10428	2L:18948883-18950973	Control	HA	OK	10.5668	13.1673	0.317416	1.41059	0.01595	0.130058	no
gene:FBgn0035443	gene:FBgn0035443	CG12010	3L:3374281-3376649	Control	HA	OK	4.77287	6.20594	0.378795	1.41129	0.016	0.130371	no
gene:FBgn0003139	gene:FBgn0003139	PpV	X:6371064-6372915	Control	HA	OK	32.7438	39.8961	0.285026	1.40096	0.01605	0.130588	no
gene:FBgn0033635	gene:FBgn0033635	Prip	2R:11436242-11442216	Control	HA	OK	124.847	102.946	-0.278277	-1.40756	0.01605	0.130588	no
gene:FBgn0005593	gene:FBgn0005593	RpL7	2L:10201003-10202321	Control	HA	OK	2053.46	2596.85	0.338706	1.41917	0.01615	0.131115	no
gene:FBgn0037261	gene:FBgn0037261	CG9775	3R:4638009-4641838	Control	HA	OK	110.464	90.3711	-0.289638	-1.40177	0.01615	0.131115	no
gene:FBgn0083969	gene:FBgn0083969	CG34133	3R:29869364-29875159	Control	HA	OK	9.10618	11.108	0.286676	1.37538	0.01615	0.131115	no
gene:FBgn0000562	gene:FBgn0000562	egl	2R:23734903-23746829	Control	HA	OK	18.5365	22.5106	0.280235	1.37879	0.0162	0.131234	no
gene:FBgn0039479	gene:FBgn0039479	CG14257	3R:27075869-27082818	Control	HA	OK	12.767	16.3875	0.360177	1.39718	0.0162	0.131234	no
gene:FBgn0285991	gene:FBgn0285991	hpRNA:CR18854	2L:9782383-9790745	Control	HA	OK	112.977	91.4312	-0.305264	-1.35996	0.0162	0.131234	no
gene:FBgn0037262	gene:FBgn0037262	MED31	3R:4641962-4644636	Control	HA	OK	45.3374	59.4765	0.39162	1.40161	0.01625	0.131353	no
gene:FBgn0053855	gene:FBgn0053855	His1:CG33855	2L:21521615-21522638	Control	HA	OK	4.68042	6.93983	0.568264	1.42068	0.01625	0.131353	no
gene:FBgn0270924	gene:FBgn0270924	zf30C	2L:9758341-9762375	Control	HA	OK	22.7658	27.6992	0.282979	1.37924	0.01625	0.131353	no
gene:FBgn0263746	gene:FBgn0263746	CR43671	2L:16728034-16729681	Control	HA	OK	0.524695	0.977309	0.897335	1.47933	0.0163	0.131662	no
gene:FBgn0031401	gene:FBgn0031401	papi	2L:2220747-2225544	Control	HA	OK	16.7285	20.4858	0.292317	1.37274	0.0164	0.132278	no
gene:FBgn0039757	gene:FBgn0039757	RpS7	3R:30206446-30209020	Control	HA	OK	3724.91	4741.44	0.34812	1.42277	0.0164	0.132278	no
gene:FBgn0015926	gene:FBgn0015926	dah	X:15328341-15333154	Control	HA	OK	16.7129	21.8328	0.385535	1.39369	0.0165	0.132989	no
gene:FBgn0051102	gene:FBgn0051102	CG31102	3R:25293457-25295594	Control	HA	OK	11.6824	9.24313	-0.337881	-1.40331	0.01655	0.133296	no
gene:FBgn0260397	gene:FBgn0260397	Su(var)3-3	3L:20226380-20230250	Control	HA	OK	5.69214	7.07091	0.312925	1.37233	0.0166	0.133602	no
gene:FBgn0038257	gene:FBgn0038257	smp-30	3R:14741581-14795868	Control	HA	OK	47.0657	30.1304	-0.643458	-1.47226	0.01665	0.133908	no
gene:FBgn0037975	gene:FBgn0037975	CG3397	3R:11983097-11984541	Control	HA	OK	16.7286	13.0953	-0.353268	-1.41507	0.0167	0.13402	no
gene:FBgn0039817	gene:FBgn0039817	CG15553	3R:31098867-31101169	Control	HA	OK	4.6843	3.55383	-0.398458	-1.38132	0.0167	0.13402	no
gene:FBgn0045761	gene:FBgn0045761	CHKov1	3R:25323155-25329316	Control	HA	OK	5.18289	6.93012	0.419123	1.37949	0.0167	0.13402	no
gene:FBgn0030061	gene:FBgn0030061	CG1785	X:8714935-8720277	Control	HA	OK	34.2486	43.5186	0.345588	1.38102	0.01675	0.134325	no
gene:FBgn0038516	gene:FBgn0038516	P5cr-2	3R:17534814-17539963	Control	HA	OK	25.4065	17.021	-0.57788	-1.4077	0.0168	0.134629	no
gene:FBgn0032512	gene:FBgn0032512	Bdp1	2L:13371426-13373890	Control	HA	OK	12.7099	15.7926	0.313293	1.37665	0.01685	0.134836	no
gene:FBgn0260962	gene:FBgn0260962	pic	3R:13052244-13056725	Control	HA	OK	19.7109	23.7891	0.271311	1.35712	0.01685	0.134836	no
gene:FBgn0028690	gene:FBgn0028690	Rpn5	3R:5789492-5791569	Control	HA	OK	110.357	133.831	0.278232	1.38204	0.0169	0.135139	no
gene:FBgn0035519	gene:FBgn0035519	CG1309	3L:4259429-4262470	Control	HA	OK	21.9448	28.0664	0.354966	1.36508	0.01695	0.135442	no
gene:FBgn0033788	gene:FBgn0033788	CG13323	2R:13044694-13047256	Control	HA	OK	252.66	208.151	-0.279564	-1.45668	0.017	0.135745	no
gene:FBgn0032633	gene:FBgn0032633	Lrch	2L:17367510-17384115	Control	HA	OK	7.47003	9.20291	0.300976	1.38805	0.01705	0.135949	no
gene:FBgn0032665	gene:FBgn0032665	CG15152	2L:18114546-18115220	Control	HA	OK	42.5598	33.7945	-0.332703	-1.44525	0.01705	0.135949	no
gene:FBgn0027783	gene:FBgn0027783	SMC2	2R:14848620-14852653	Control	HA	OK	8.65352	10.6316	0.296999	1.36864	0.0171	0.136154	no
gene:FBgn0036668	gene:FBgn0036668	Zcchc7	3L:16845385-16852350	Control	HA	OK	11.3982	13.8321	0.279209	1.37713	0.0171	0.136154	no
gene:FBgn0026602	gene:FBgn0026602	Ady43A	2R:7243023-7245776	Control	HA	OK	19.0867	15.5453	-0.296093	-1.37834	0.0172	0.13656	no
gene:FBgn0032075	gene:FBgn0032075	Tsp29Fb	2L:8937389-8943257	Control	HA	OK	154.739	123.7	-0.322985	-1.37724	0.0172	0.13656	no
gene:FBgn0052708	gene:FBgn0052708	CG32708	X:9085931-9086864	Control	HA	OK	55.4114	44.8031	-0.306582	-1.38347	0.0172	0.13656	no
gene:FBgn0264479	gene:FBgn0264479	CR43887	3L:11693134-11693661	Control	HA	OK	2.29748	1.10315	-1.05843	-1.22531	0.0172	0.13656	no
gene:FBgn0029148	gene:FBgn0029148	NHP2	3L:14801327-14802168	Control	HA	OK	263.708	217.127	-0.280402	-1.39228	0.01725	0.13686	no
gene:FBgn0024315	gene:FBgn0024315	Picot	2R:16655322-16667675	Control	HA	OK	44.2627	53.4988	0.273415	1.35564	0.0174	0.136882	no
gene:FBgn0027780	gene:FBgn0027780	U26	2L:8445860-8449576	Control	HA	OK	5.10304	6.42417	0.332154	1.38959	0.0173	0.136882	no
gene:FBgn0031454	gene:FBgn0031454	CG9960	2L:2758426-2759677	Control	HA	OK	39.6996	32.0259	-0.309887	-1.41011	0.0174	0.136882	no
gene:FBgn0033132	gene:FBgn0033132	Tsp42Ej	2R:7040135-7044710	Control	HA	OK	50.4984	41.4701	-0.284166	-1.36344	0.01735	0.136882	no
gene:FBgn0033327	gene:FBgn0033327	PGRP-SC1b	2R:8713445-8715094	Control	HA	OK	55.9441	44.3726	-0.334318	-1.41149	0.01735	0.136882	no
gene:FBgn0033448	gene:FBgn0033448	hebe	2R:9828103-9836642	Control	HA	OK	49.9477	41.0695	-0.282349	-1.36459	0.01735	0.136882	no
gene:FBgn0034470	gene:FBgn0034470	Obp56d	2R:19702923-19703915	Control	HA	OK	523.27	432.55	-0.274689	-1.36161	0.0173	0.136882	no
gene:FBgn0037207	gene:FBgn0037207	Mes2	3L:22945656-22952248	Control	HA	OK	16.4352	13.4496	-0.28922	-1.369	0.01735	0.136882	no
gene:FBgn0037843	gene:FBgn0037843	CG4511	3R:10854500-10856412	Control	HA	OK	75.398	90.9877	0.271144	1.39103	0.0173	0.136882	no
gene:FBgn0038428	gene:FBgn0038428	CG14894	3R:16441842-16443007	Control	HA	OK	145.345	119.682	-0.280272	-1.39857	0.0174	0.136882	no
gene:FBgn0039182	gene:FBgn0039182	CG5728	3R:24318815-24333316	Control	HA	OK	14.9385	19.4356	0.379667	1.35805	0.0174	0.136882	no
gene:FBgn0260964	gene:FBgn0260964	Vmat	2R:13513131-13534251	Control	HA	OK	10.2605	7.99586	-0.359775	-1.35613	0.0174	0.136882	no
gene:FBgn0021967	gene:FBgn0021967	ND-PDSW	2L:3466156-3467334	Control	HA	OK	783.81	647.604	-0.275391	-1.36455	0.0175	0.137475	no
gene:FBgn0033183	gene:FBgn0033183	CG1620	2R:7493805-7496466	Control	HA	OK	33.5718	40.7858	0.280819	1.36966	0.0175	0.137475	no
gene:FBgn0261560	gene:FBgn0261560	Thor	2L:3478433-3479612	Control	HA	OK	638.803	524.402	-0.284698	-1.36024	0.01755	0.137771	no
gene:FBgn0011476	gene:FBgn0011476	l(3)neo43	3R:15275521-15278668	Control	HA	OK	60.0162	39.1673	-0.615703	-1.39808	0.0176	0.13797	no
gene:FBgn0036763	gene:FBgn0036763	TrpRS-m	3L:17849726-17852453	Control	HA	OK	7.76894	9.70838	0.321511	1.37216	0.0176	0.13797	no
gene:FBgn0037007	gene:FBgn0037007	CG5059	3L:20514597-20519393	Control	HA	OK	91.1973	74.9457	-0.283146	-1.43292	0.01765	0.138168	no
gene:FBgn0260789	gene:FBgn0260789	mxc	X:9236800-9243467	Control	HA	OK	5.65607	6.97814	0.303043	1.39058	0.01765	0.138168	no
gene:FBgn0262035	gene:FBgn0262035	CG42846	3L:230970-231604	Control	HA	OK	32.7066	25.3551	-0.367303	-1.36332	0.01775	0.138853	no
gene:FBgn0010328	gene:FBgn0010328	woc	3R:27256594-27264055	Control	HA	OK	24.6619	30.0266	0.283957	1.36249	0.0178	0.138855	no
gene:FBgn0031842	gene:FBgn0031842	Tango1	2L:6649387-6654574	Control	HA	OK	19.7391	23.8706	0.27418	1.37014	0.0178	0.138855	no
gene:FBgn0035141	gene:FBgn0035141	Cypl	3L:540850-542931	Control	HA	OK	20.9026	28.4155	0.442996	1.40546	0.0178	0.138855	no
gene:FBgn0069973	gene:FBgn0069973	CG40485	X:22960608-22962360	Control	HA	OK	46.7202	37.7134	-0.30897	-1.3719	0.0178	0.138855	no
gene:FBgn0000045	gene:FBgn0000045	Act79B	3L:21985209-21987190	Control	HA	OK	631.935	776.121	0.296506	1.35963	0.01785	0.138857	no
gene:FBgn0025716	gene:FBgn0025716	Bap55	2R:17429352-17430963	Control	HA	OK	26.5948	32.6337	0.295217	1.39081	0.01785	0.138857	no
gene:FBgn0032723	gene:FBgn0032723	ssp3	2L:18916346-18943960	Control	HA	OK	5.62632	6.9097	0.29643	1.38068	0.01785	0.138857	no
gene:FBgn0085474	gene:FBgn0085474	CG34445	2R:22647891-22648478	Control	HA	OK	15.096	10.128	-0.575814	-1.38427	0.01785	0.138857	no
gene:FBgn0031668	gene:FBgn0031668	CG31917	2L:5009930-5010834	Control	HA	OK	89.5364	73.837	-0.278131	-1.36425	0.018	0.139537	no
gene:FBgn0039627	gene:FBgn0039627	CG11837	3R:29049492-29050721	Control	HA	OK	29.3011	36.4307	0.314202	1.35782	0.018	0.139537	no
gene:FBgn0051739	gene:FBgn0051739	AspRS-m	2L:16827077-16834502	Control	HA	OK	12.3728	15.1089	0.28823	1.36518	0.018	0.139537	no
gene:FBgn0053910	gene:FBgn0053910	His2B:CG33910	2L:21418111-21418706	Control	HA	OK	4.16145	2.2295	-0.900363	-1.47033	0.018	0.139537	no
gene:FBgn0261570	gene:FBgn0261570	CG42684	X:17710143-17752007	Control	HA	OK	6.611	8.16056	0.3038	1.34578	0.018	0.139537	no
gene:FBgn0020389	gene:FBgn0020389	Papss	3L:19845292-19860925	Control	HA	OK	13.0433	16.1335	0.306744	1.35289	0.01805	0.139731	no
gene:FBgn0051973	gene:FBgn0051973	Cda5	2L:25401-65404	Control	HA	OK	4.52019	5.66475	0.325629	1.3833	0.01805	0.139731	no
gene:FBgn0027930	gene:FBgn0027930	MP1	3R:4307434-4310947	Control	HA	OK	18.1321	12.792	-0.503302	-1.36803	0.01815	0.14002	no
gene:FBgn0036537	gene:FBgn0036537	CG18081	3L:15832463-15835388	Control	HA	OK	206.432	168.079	-0.296529	-1.42649	0.0181	0.14002	no
gene:FBgn0040078	gene:FBgn0040078	pont	3R:10262122-10263899	Control	HA	OK	48.4689	58.4013	0.268941	1.33723	0.01815	0.14002	no
gene:FBgn0051901	gene:FBgn0051901	Mur29B	2L:8352186-8355172	Control	HA	OK	16.2168	13.2513	-0.291354	-1.42107	0.01815	0.14002	no
gene:FBgn0053835	gene:FBgn0053835	His2A:CG33835	2L:21488377-21488870	Control	HA	OK	66.7045	52.7386	-0.338926	-1.36091	0.01815	0.14002	no
gene:FBgn0026090	gene:FBgn0026090	CG14812	X:1857888-1858971	Control	HA	OK	42.1708	34.0968	-0.306608	-1.37948	0.01825	0.140597	no
gene:FBgn0032819	gene:FBgn0032819	CG10463	2L:19758878-19760986	Control	HA	OK	10.397	13.1114	0.334663	1.3449	0.01825	0.140597	no
gene:FBgn0037958	gene:FBgn0037958	CG6962	3R:11877234-11882534	Control	HA	OK	3.71853	4.98607	0.42317	1.34619	0.01835	0.141172	no
gene:FBgn0263133	gene:FBgn0263133	mEFG1	2L:7220368-7223081	Control	HA	OK	12.3569	15.2297	0.301572	1.36682	0.01835	0.141172	no
gene:FBgn0035166	gene:FBgn0035166	CG13902	3L:839979-841360	Control	HA	OK	9.17121	11.8376	0.368188	1.35486	0.0184	0.141362	no
gene:FBgn0267521	gene:FBgn0267521	18SrRNA-Psi:CR45861	X:23278006-23283731	Control	HA	OK	90.503	67.5	-0.423077	-1.38334	0.0184	0.141362	no
gene:FBgn0067903	gene:FBgn0067903	IM18	2R:23600913-23601773	Control	HA	OK	22.0456	13.2814	-0.731082	-1.57016	0.01845	0.141649	no
gene:FBgn0032339	gene:FBgn0032339	Wdr59	2L:11091443-11095096	Control	HA	OK	5.79446	7.17038	0.307375	1.35361	0.0185	0.141838	no
gene:FBgn0036301	gene:FBgn0036301	CG4069	3L:12534589-12537315	Control	HA	OK	20.3874	26.1428	0.358731	1.35804	0.0185	0.141838	no
gene:FBgn0014877	gene:FBgn0014877	Roe1	2R:13554076-13555606	Control	HA	OK	108.734	90.0474	-0.272051	-1.35215	0.01855	0.142123	no
gene:FBgn0014417	gene:FBgn0014417	CG13397	2L:8408887-8411868	Control	HA	OK	10.4167	12.7984	0.297069	1.35271	0.0186	0.142311	no
gene:FBgn0052230	gene:FBgn0052230	ND-MLRQ	3L:23339227-23345936	Control	HA	OK	3759.73	2952.4	-0.34874	-1.41832	0.0186	0.142311	no
gene:FBgn0037027	gene:FBgn0037027	HIPP1	3L:20809668-20813332	Control	HA	OK	18.8281	22.716	0.270815	1.33632	0.01865	0.142596	no
gene:FBgn0027949	gene:FBgn0027949	msb1l	2L:19577700-19580351	Control	HA	OK	22.9148	29.4575	0.362356	1.35935	0.0187	0.142685	no
gene:FBgn0032292	gene:FBgn0032292	EMC3	2L:10731399-10732423	Control	HA	OK	39.7446	48.6797	0.292561	1.38444	0.0187	0.142685	no
gene:FBgn0039214	gene:FBgn0039214	puf	3R:24635269-24650043	Control	HA	OK	4.47281	5.40991	0.274422	1.3419	0.0187	0.142685	no
gene:FBgn0261873	gene:FBgn0261873	sdt	X:8178548-8240474	Control	HA	OK	12.3156	9.97391	-0.30426	-1.36255	0.01875	0.142871	no
gene:FBgn0265862	gene:FBgn0265862	CR44651	2R:20531866-20532969	Control	HA	OK	1.78904	1.10488	-0.695292	-1.44366	0.01875	0.142871	no
gene:FBgn0004387	gene:FBgn0004387	Klp98A	3R:27547774-27559145	Control	HA	OK	6.26987	7.64734	0.286523	1.37024	0.0188	0.143154	no
gene:FBgn0031489	gene:FBgn0031489	CG17224	2L:3016440-3018308	Control	HA	OK	22.4664	18.0069	-0.319219	-1.33364	0.01885	0.143242	no
gene:FBgn0034162	gene:FBgn0034162	CG6426	2R:16869401-16871851	Control	HA	OK	74.5674	61.0381	-0.288834	-1.37879	0.01885	0.143242	no
gene:FBgn0035625	gene:FBgn0035625	Blimp-1	3L:5630982-5652094	Control	HA	OK	2.6979	2.11386	-0.351954	-1.356	0.01885	0.143242	no
gene:FBgn0032435	gene:FBgn0032435	Oatp33Eb	2L:12448483-12453242	Control	HA	OK	6.24679	4.93496	-0.340075	-1.35288	0.0189	0.143329	no
gene:FBgn0032815	gene:FBgn0032815	CG10462	2L:19732079-19735980	Control	HA	OK	11.6002	14.0765	0.279138	1.34562	0.0189	0.143329	no
gene:FBgn0038950	gene:FBgn0038950	CG5382	3R:22362619-22365983	Control	HA	OK	54.7299	41.9868	-0.382391	-1.35509	0.0189	0.143329	no
gene:FBgn0030658	gene:FBgn0030658	CG7872	X:15578204-15579857	Control	HA	OK	32.2493	39.3278	0.286282	1.35718	0.01895	0.143611	no
gene:FBgn0265778	gene:FBgn0265778	PDZ-GEF	2L:6323766-6332789	Control	HA	OK	6.70708	8.19191	0.288514	1.37181	0.019	0.143892	no
gene:FBgn0033734	gene:FBgn0033734	CG8520	2R:12422930-12425459	Control	HA	OK	76.8024	63.7034	-0.269781	-1.3538	0.01905	0.143978	no
gene:FBgn0037547	gene:FBgn0037547	CG7910	3R:8087251-8089526	Control	HA	OK	102.881	124.289	0.272718	1.35299	0.01905	0.143978	no
gene:FBgn0040551	gene:FBgn0040551	CG11686	3R:13260355-13262227	Control	HA	OK	39.8522	30.8697	-0.368466	-1.57324	0.01905	0.143978	no
gene:FBgn0038860	gene:FBgn0038860	Ice2	3R:21130215-21132720	Control	HA	OK	5.27201	6.81942	0.371294	1.34519	0.0191	0.144258	no
gene:FBgn0002962	gene:FBgn0002962	nos	3R:19154096-19162300	Control	HA	OK	109.064	85.4956	-0.351247	-1.37182	0.0192	0.144817	no
gene:FBgn0014189	gene:FBgn0014189	Hel25E	2L:5539325-5542314	Control	HA	OK	105.726	128.101	0.276952	1.36133	0.0192	0.144817	no
gene:FBgn0011573	gene:FBgn0011573	Cdc37	3L:1795391-1798610	Control	HA	OK	25.7074	31.9076	0.311713	1.36379	0.01925	0.144998	no
gene:FBgn0263660	gene:FBgn0263660	CR43651	2R:9552843-9553940	Control	HA	OK	0.781541	1.4226	0.864138	1.40519	0.01925	0.144998	no
gene:FBgn0000239	gene:FBgn0000239	bur	2L:21174181-21179729	Control	HA	OK	38.8579	46.9902	0.274153	1.3654	0.0193	0.145277	no
gene:FBgn0035464	gene:FBgn0035464	PIG-B	3L:3811262-3813958	Control	HA	OK	9.97008	12.2366	0.295528	1.35433	0.0194	0.145931	no
gene:FBgn0030692	gene:FBgn0030692	mRpS30	X:15786046-15788288	Control	HA	OK	31.6494	38.3495	0.277031	1.34215	0.01945	0.146209	no
gene:FBgn0040252	gene:FBgn0040252	Ugt86Dh	3R:11175528-11177910	Control	HA	OK	5.04286	3.88067	-0.377936	-1.34717	0.0195	0.146486	no
gene:FBgn0037763	gene:FBgn0037763	CG16904	3R:9815927-9816979	Control	HA	OK	192.284	159.227	-0.272155	-1.38536	0.01955	0.146763	no
gene:FBgn0034974	gene:FBgn0034974	CG16786	2R:24081781-24086287	Control	HA	OK	1.55232	2.17384	0.485815	1.31625	0.0196	0.146842	no
gene:FBgn0036483	gene:FBgn0036483	CG12316	3L:15131507-15136934	Control	HA	OK	9.92803	12.1112	0.28676	1.34868	0.0196	0.146842	no
gene:FBgn0037364	gene:FBgn0037364	Rab23	3R:5680053-5685434	Control	HA	OK	8.84407	10.958	0.309197	1.35123	0.0196	0.146842	no
gene:FBgn0000052	gene:FBgn0000052	ade2	2L:6038116-6046050	Control	HA	OK	17.9224	21.92	0.290485	1.34214	0.01965	0.147118	no
gene:FBgn0033304	gene:FBgn0033304	Cyp6a13	2R:8570498-8572147	Control	HA	OK	26.5078	21.8167	-0.280981	-1.33139	0.0197	0.147196	no
gene:FBgn0036324	gene:FBgn0036324	CG12520	3L:12901246-12902737	Control	HA	OK	3.51516	2.41432	-0.541971	-1.35072	0.0197	0.147196	no
gene:FBgn0038047	gene:FBgn0038047	CG5245	3R:12429559-12431235	Control	HA	OK	1.6922	2.60977	0.625022	1.39378	0.0197	0.147196	no
gene:FBgn0037777	gene:FBgn0037777	CG11722	3R:10043269-10045542	Control	HA	OK	44.6713	32.823	-0.44464	-1.33941	0.0198	0.147746	no
gene:FBgn0038034	gene:FBgn0038034	Cyp9f3	3R:12386248-12402902	Control	HA	OK	22.3095	15.573	-0.518615	-1.36485	0.0198	0.147746	no
gene:FBgn0003525	gene:FBgn0003525	stg	3R:29251825-29255800	Control	HA	OK	29.7445	35.7531	0.265445	1.34521	0.0199	0.147997	no
gene:FBgn0004406	gene:FBgn0004406	tam	2L:13823979-13827772	Control	HA	OK	7.01622	8.68814	0.308352	1.36141	0.01985	0.147997	no
gene:FBgn0034460	gene:FBgn0034460	CG18367	2R:19636659-19637400	Control	HA	OK	32.787	22.7615	-0.526529	-1.37409	0.0199	0.147997	no
gene:FBgn0051199	gene:FBgn0051199	CG31199	3R:20740107-20756639	Control	HA	OK	16.4873	11.7899	-0.483797	-1.34146	0.0199	0.147997	no
gene:FBgn0262619	gene:FBgn0262619	DNA-ligI	2R:23890511-23894987	Control	HA	OK	14.8218	18.9537	0.354756	1.34472	0.0199	0.147997	no
gene:FBgn0035398	gene:FBgn0035398	Cht7	3L:3090984-3106958	Control	HA	OK	2.75246	3.54494	0.365039	1.33599	0.01995	0.148172	no
gene:FBgn0036480	gene:FBgn0036480	Cep135	3L:15116736-15131378	Control	HA	OK	4.19761	5.44907	0.376443	1.34647	0.01995	0.148172	no
gene:FBgn0030294	gene:FBgn0030294	Pa1	X:11359235-11360929	Control	HA	OK	42.6309	35.3747	-0.269181	-1.38548	0.02005	0.148716	no
gene:FBgn0034245	gene:FBgn0034245	UQCR-6.4	2R:17568731-17572784	Control	HA	OK	1926.03	1527.64	-0.334328	-1.37436	0.02005	0.148716	no
gene:FBgn0027568	gene:FBgn0027568	Cand1	2L:10358133-10362707	Control	HA	OK	14.094	16.9977	0.27026	1.34844	0.0201	0.148889	no
gene:FBgn0267522	gene:FBgn0267522	28SrRNA-Psi:CR45862	X:23278006-23283731	Control	HA	OK	97.7916	71.9761	-0.442192	-1.4264	0.0201	0.148889	no
gene:FBgn0004872	gene:FBgn0004872	piwi	2L:10976771-10987420	Control	HA	OK	33.5572	42.948	0.355969	1.35727	0.02015	0.149062	no
gene:FBgn0052694	gene:FBgn0052694	CG32694	X:9989689-10006882	Control	HA	OK	5.2216	6.62757	0.343987	1.35661	0.02015	0.149062	no
gene:FBgn0052195	gene:FBgn0052195	CG32195	3L:18112958-18121989	Control	HA	OK	10.575	8.0067	-0.401373	-1.33121	0.0202	0.149333	no
gene:FBgn0030710	gene:FBgn0030710	CG8924	X:15941076-15944449	Control	HA	OK	11.7187	14.263	0.283462	1.33757	0.02025	0.149504	no
gene:FBgn0053819	gene:FBgn0053819	His1:CG33819	2L:21461172-21462195	Control	HA	OK	5.74502	8.23587	0.519609	1.39279	0.02025	0.149504	no
gene:FBgn0263763	gene:FBgn0263763	CG43680	3L:15014694-15064977	Control	HA	OK	279.656	195.696	-0.51504	-1.40511	0.0203	0.149775	no
gene:FBgn0051200	gene:FBgn0051200	CG31200	3R:20740107-20756639	Control	HA	OK	28.0283	20.8806	-0.42472	-1.35785	0.02035	0.149945	no
gene:FBgn0284436	gene:FBgn0284436	CCT8	2R:8904843-8906990	Control	HA	OK	172.394	208.298	0.272938	1.34295	0.02035	0.149945	no
gene:FBgn0030293	gene:FBgn0030293	CG1737	X:11350607-11355539	Control	HA	OK	15.5013	18.7021	0.270814	1.35829	0.0204	0.150017	no
gene:FBgn0034351	gene:FBgn0034351	rswl	2R:18451283-18452736	Control	HA	OK	14.4125	18.0546	0.325047	1.35037	0.0204	0.150017	no
gene:FBgn0262527	gene:FBgn0262527	nsl1	3R:15793781-15802102	Control	HA	OK	16.3926	19.7348	0.267701	1.34038	0.0204	0.150017	no
gene:FBgn0035111	gene:FBgn0035111	Dis3l2	3L:212708-216479	Control	HA	OK	13.5535	16.3707	0.272452	1.32751	0.02045	0.150285	no
gene:FBgn0030396	gene:FBgn0030396	CG2556	X:12497187-12516565	Control	HA	OK	26.9702	22.3944	-0.268226	-1.32742	0.02065	0.151456	no
gene:FBgn0039379	gene:FBgn0039379	CG5886	3R:25851631-25853989	Control	HA	OK	28.9595	35.3821	0.288983	1.3446	0.02065	0.151456	no
gene:FBgn0041184	gene:FBgn0041184	Socs36E	2L:18138674-18152417	Control	HA	OK	4.33772	5.5369	0.352142	1.3357	0.02065	0.151456	no
gene:FBgn0016691	gene:FBgn0016691	ATPsynO	3R:15265590-15268538	Control	HA	OK	1687.27	1377.83	-0.292289	-1.35496	0.0207	0.151723	no
gene:FBgn0265376	gene:FBgn0265376	CR44317	3R:4596282-4599749	Control	HA	OK	1.26141	0.756882	-0.736893	-1.33477	0.02075	0.15199	no
gene:FBgn0034485	gene:FBgn0034485	CG11099	2R:20236234-20239429	Control	HA	OK	6.95253	5.43497	-0.355265	-1.34903	0.02085	0.152522	no
gene:FBgn0040507	gene:FBgn0040507	ACXD	3L:2237607-2243719	Control	HA	OK	3.22118	2.48719	-0.373076	-1.32902	0.02085	0.152522	no
gene:FBgn0016070	gene:FBgn0016070	smg	3L:8990316-8997989	Control	HA	OK	65.5397	79.384	0.27648	1.33401	0.02095	0.153053	no
gene:FBgn0259685	gene:FBgn0259685	crb	3R:24295077-24314541	Control	HA	OK	5.73941	6.95243	0.276614	1.34025	0.02095	0.153053	no
gene:FBgn0010282	gene:FBgn0010282	TfIIFalpha	3R:6380466-6382604	Control	HA	OK	54.4312	65.5723	0.268653	1.347	0.021	0.153118	no
gene:FBgn0086265	gene:FBgn0086265	psd	2L:5963086-5964951	Control	HA	OK	59.9097	72.1924	0.269057	1.33429	0.021	0.153118	no
gene:FBgn0261530	gene:FBgn0261530	nbs	3L:9719327-9723194	Control	HA	OK	11.9509	14.8707	0.315353	1.35827	0.021	0.153118	no
gene:FBgn0061200	gene:FBgn0061200	Nup153	X:16599240-16610459	Control	HA	OK	9.97917	11.9644	0.261758	1.31178	0.02105	0.153382	no
gene:FBgn0015793	gene:FBgn0015793	Rab19	3L:8297017-8299839	Control	HA	OK	30.257	22.5073	-0.426873	-1.35009	0.0211	0.153546	no
gene:FBgn0038673	gene:FBgn0038673	CG14286	3R:19024091-19024853	Control	HA	OK	79.3579	64.8412	-0.291464	-1.32989	0.0211	0.153546	no
gene:FBgn0037106	gene:FBgn0037106	CG11307	3L:21617622-21619873	Control	HA	OK	15.842	19.7303	0.31666	1.33127	0.02115	0.153809	no
gene:FBgn0003388	gene:FBgn0003388	shd	3L:14614457-14622205	Control	HA	OK	2.12902	1.43579	-0.568343	-1.33319	0.0213	0.154397	no
gene:FBgn0004646	gene:FBgn0004646	ogre	X:6973619-6991318	Control	HA	OK	20.9495	26.4526	0.336494	1.34772	0.0213	0.154397	no
gene:FBgn0038601	gene:FBgn0038601	CG18600	3R:18300194-18301728	Control	HA	OK	67.1257	55.7381	-0.268201	-1.3339	0.0213	0.154397	no
gene:FBgn0039272	gene:FBgn0039272	CG11836	3R:25071125-25072712	Control	HA	OK	17.5749	13.9655	-0.331647	-1.34118	0.0213	0.154397	no
gene:FBgn0262846	gene:FBgn0262846	CG43210	3R:18564263-18565173	Control	HA	OK	2.14775	1.1361	-0.918731	-1.3787	0.0213	0.154397	no
gene:FBgn0036194	gene:FBgn0036194	CG11652	3L:11693878-11696963	Control	HA	OK	16.7057	20.4385	0.290948	1.30967	0.02145	0.155384	no
gene:FBgn0000276	gene:FBgn0000276	CecA1	3R:30210873-30211273	Control	HA	OK	11.2401	6.62772	-0.762074	-1.3455	0.0215	0.155443	no
gene:FBgn0036340	gene:FBgn0036340	SRm160	3L:13036820-13040976	Control	HA	OK	17.431	20.9668	0.266449	1.29609	0.0215	0.155443	no
gene:FBgn0086443	gene:FBgn0086443	AsnRS	2L:19129468-19131954	Control	HA	OK	80.7586	97.1155	0.266084	1.32519	0.0215	0.155443	no
gene:FBgn0004647	gene:FBgn0004647	N	X:3134869-3172221	Control	HA	OK	2.25662	2.76536	0.293303	1.29283	0.02155	0.155704	no
gene:FBgn0052407	gene:FBgn0052407	CG32407	3L:5922054-5923567	Control	HA	OK	25.96	20.5965	-0.33389	-1.32326	0.02165	0.156325	no
gene:FBgn0030320	gene:FBgn0030320	CG2247	X:11606289-11611652	Control	HA	OK	13.4779	16.2447	0.269378	1.31678	0.0217	0.156585	no
gene:FBgn0030711	gene:FBgn0030711	Rrp47	X:15944896-15946249	Control	HA	OK	91.1664	74.9831	-0.281937	-1.35058	0.02175	0.156642	no
gene:FBgn0034735	gene:FBgn0034735	CG4610	2R:22492196-22494295	Control	HA	OK	11.1194	13.674	0.29836	1.3267	0.02175	0.156642	no
gene:FBgn0039600	gene:FBgn0039600	CG1646	3R:28812101-28819668	Control	HA	OK	14.8293	18.8079	0.342892	1.33344	0.02175	0.156642	no
gene:FBgn0263490	gene:FBgn0263490	mld	3R:24585652-24625562	Control	HA	OK	10.3217	12.9398	0.326123	1.33627	0.0218	0.156901	no
gene:FBgn0003279	gene:FBgn0003279	RpL4	3R:27922820-27937853	Control	HA	OK	1642.96	2078.61	0.339327	1.36173	0.02185	0.15716	no
gene:FBgn0025637	gene:FBgn0025637	SkpA	X:656113-657899	Control	HA	OK	504.433	415.826	-0.278681	-1.3443	0.0219	0.157316	no
gene:FBgn0261641	gene:FBgn0261641	CG42724	3R:6361671-6368288	Control	HA	OK	10.9399	13.5063	0.304036	1.31757	0.0219	0.157316	no
gene:FBgn0015773	gene:FBgn0015773	NetA	X:14604011-14653928	Control	HA	OK	1.75049	1.22299	-0.517346	-1.33129	0.02195	0.157473	no
gene:FBgn0036985	gene:FBgn0036985	zye	3L:20413603-20424309	Control	HA	OK	1.2674	1.65508	0.385032	1.34225	0.02195	0.157473	no
gene:FBgn0015575	gene:FBgn0015575	alpha-Est7	3R:7519562-7523753	Control	HA	OK	45.3458	37.8676	-0.260003	-1.29223	0.022	0.157629	no
gene:FBgn0038438	gene:FBgn0038438	Der-2	3R:16482693-16484223	Control	HA	OK	16.9019	20.7182	0.293714	1.33943	0.022	0.157629	no
gene:FBgn0001208	gene:FBgn0001208	Hn	3L:7760452-7763166	Control	HA	OK	71.2585	59.5333	-0.259367	-1.29951	0.0223	0.159267	no
gene:FBgn0002733	gene:FBgn0002733	E(spl)mbeta-HLH	3R:26005045-26006023	Control	HA	OK	9.04922	12.452	0.460514	1.32344	0.0223	0.159267	no
gene:FBgn0029737	gene:FBgn0029737	CG6903	X:4918729-4921648	Control	HA	OK	27.5162	22.8515	-0.267993	-1.31776	0.0223	0.159267	no
gene:FBgn0034081	gene:FBgn0034081	CG10731	2R:16148811-16149795	Control	HA	OK	46.4531	37.6595	-0.302761	-1.32271	0.02225	0.159267	no
gene:FBgn0250754	gene:FBgn0250754	CG42232	3R:16458279-16469663	Control	HA	OK	5.79436	6.96629	0.265741	1.32525	0.0223	0.159267	no
gene:FBgn0002940	gene:FBgn0002940	ninaE	3R:19886254-19888206	Control	HA	OK	1142.2	916.448	-0.317689	-1.30743	0.02245	0.160236	no
gene:FBgn0003612	gene:FBgn0003612	Su(var)2-10	2R:9116121-9122000	Control	HA	OK	32.6936	39.5243	0.273729	1.31759	0.0225	0.160388	no
gene:FBgn0030410	gene:FBgn0030410	Aven	X:12624291-12629640	Control	HA	OK	9.42852	12.5871	0.416842	1.32395	0.0225	0.160388	no
gene:FBgn0031389	gene:FBgn0031389	CG4259	2L:2127308-2129237	Control	HA	OK	9.82962	7.45597	-0.39874	-1.315	0.0226	0.160998	no
gene:FBgn0037188	gene:FBgn0037188	CG7369	3L:22741792-22748614	Control	HA	OK	6.50834	7.9313	0.285268	1.30975	0.0227	0.161504	no
gene:FBgn0041147	gene:FBgn0041147	ida	3L:3905343-3907813	Control	HA	OK	4.41871	5.64878	0.354313	1.29366	0.0227	0.161504	no
gene:FBgn0010265	gene:FBgn0010265	RpS13	2L:8363476-8364662	Control	HA	OK	2265.18	2884.12	0.348507	1.33194	0.02275	0.161757	no
gene:FBgn0037490	gene:FBgn0037490	CG10053	3R:7247089-7248140	Control	HA	OK	8.24679	11.2364	0.446276	1.30763	0.0228	0.161906	no
gene:FBgn0039863	gene:FBgn0039863	CG1815	3R:31669464-31677971	Control	HA	OK	6.42396	7.77953	0.27622	1.30314	0.0228	0.161906	no
gene:FBgn0031544	gene:FBgn0031544	CG17593	2L:3514871-3517264	Control	HA	OK	83.1	69.2861	-0.262283	-1.31484	0.02285	0.162055	no
gene:FBgn0034861	gene:FBgn0034861	CG9815	2R:23421520-23433354	Control	HA	OK	4.80703	3.20612	-0.584315	-1.33086	0.02285	0.162055	no
gene:FBgn0039639	gene:FBgn0039639	CG14512	3R:29131192-29138573	Control	HA	OK	44.2097	25.9092	-0.770897	-1.36214	0.0229	0.162203	no
gene:FBgn0053805	gene:FBgn0053805	His-Psi:CR33805	2L:21428849-21429289	Control	HA	OK	61.2251	47.803	-0.357024	-1.3274	0.0229	0.162203	no
gene:FBgn0034430	gene:FBgn0034430	mip40	2R:19291104-19292196	Control	HA	OK	61.0928	50.4969	-0.274806	-1.32315	0.02295	0.162455	no
gene:FBgn0029134	gene:FBgn0029134	Prosbeta5	2R:10819977-10821640	Control	HA	OK	389.908	321.905	-0.276499	-1.31788	0.023	0.162705	no
gene:FBgn0031601	gene:FBgn0031601	Dim1	2L:4403250-4403955	Control	HA	OK	20.9881	26.3978	0.330847	1.32784	0.02315	0.163663	no
gene:FBgn0040637	gene:FBgn0040637	CG11458	3L:20905794-20906331	Control	HA	OK	33.8066	43.4774	0.36296	1.32147	0.02325	0.164266	no
gene:FBgn0052000	gene:FBgn0052000	CG32000	4:132219-143123	Control	HA	OK	31.1286	25.6514	-0.279201	-1.3435	0.0233	0.164515	no
gene:FBgn0053884	gene:FBgn0053884	His2B:CG33884	2L:21497744-21498339	Control	HA	OK	4.89573	2.86747	-0.771743	-1.36109	0.02335	0.164764	no
gene:FBgn0036192	gene:FBgn0036192	Pldn	3L:11683979-11691399	Control	HA	OK	21.5671	13.8233	-0.641732	-1.35023	0.0234	0.164804	no
gene:FBgn0036980	gene:FBgn0036980	RhoBTB	3L:20376241-20382398	Control	HA	OK	18.1895	21.7655	0.258937	1.29002	0.0234	0.164804	no
gene:FBgn0262955	gene:FBgn0262955	RpII140	3R:14125790-14130111	Control	HA	OK	18.0497	21.7029	0.265915	1.32002	0.0234	0.164804	no
gene:FBgn0036787	gene:FBgn0036787	CG4306	3L:18461956-18463163	Control	HA	OK	15.2057	11.9377	-0.349096	-1.30177	0.02345	0.164948	no
gene:FBgn0267504	gene:FBgn0267504	28SrRNA:CR45844	rDNA:66806-74924	Control	HA	OK	172.436	131.88	-0.386834	-1.34468	0.02345	0.164948	no
gene:FBgn0031606	gene:FBgn0031606	CG15439	2L:4449294-4453038	Control	HA	OK	6.16225	7.63977	0.310071	1.29521	0.0235	0.165196	no
gene:FBgn0011692	gene:FBgn0011692	pav	3L:4242733-4246233	Control	HA	OK	18.2863	21.9779	0.265294	1.29733	0.0236	0.16569	no
gene:FBgn0038113	gene:FBgn0038113	CG11668	3R:13038374-13044086	Control	HA	OK	4.70513	2.98707	-0.655507	-1.34681	0.0236	0.16569	no
gene:FBgn0033092	gene:FBgn0033092	CG9422	2R:6673603-6693162	Control	HA	OK	47.0077	34.2528	-0.456673	-1.33891	0.02375	0.166638	no
gene:FBgn0030420	gene:FBgn0030420	CG12717	X:12760641-12763611	Control	HA	OK	7.14503	8.87977	0.313581	1.33254	0.02385	0.16713	no
gene:FBgn0265377	gene:FBgn0265377	CR44318	3R:8287168-8287698	Control	HA	OK	2.07925	0.892542	-1.22007	-1.30874	0.02385	0.16713	no
gene:FBgn0003015	gene:FBgn0003015	osk	3R:8934278-8938395	Control	HA	OK	107.229	129.313	0.270173	1.30134	0.02395	0.167725	no
gene:FBgn0028424	gene:FBgn0028424	JhI-26	2R:16287585-16294130	Control	HA	OK	34.4049	26.364	-0.384048	-1.29914	0.024	0.167865	no
gene:FBgn0085205	gene:FBgn0085205	CG34176	2L:4004079-4004480	Control	HA	OK	77.5832	60.6883	-0.354328	-1.34159	0.024	0.167865	no
gene:FBgn0010583	gene:FBgn0010583	dock	2L:825968-833241	Control	HA	OK	9.60959	11.639	0.276424	1.35039	0.02405	0.167899	no
gene:FBgn0027563	gene:FBgn0027563	CG9631	3R:14225097-14226762	Control	HA	OK	10.4063	8.20083	-0.34362	-1.31321	0.02405	0.167899	no
gene:FBgn0036886	gene:FBgn0036886	CG9300	3L:19552419-19554767	Control	HA	OK	14.6551	17.7572	0.277007	1.29446	0.02405	0.167899	no
gene:FBgn0031114	gene:FBgn0031114	cactin	X:20424068-20426402	Control	HA	OK	9.09935	11.4068	0.326065	1.30485	0.0241	0.168143	no
gene:FBgn0002873	gene:FBgn0002873	mud	X:14247731-14258595	Control	HA	OK	7.23204	8.69133	0.265174	1.29788	0.0243	0.168622	no
gene:FBgn0004177	gene:FBgn0004177	mts	2L:7827649-7833576	Control	HA	OK	275.642	226.248	-0.284891	-1.30466	0.02435	0.168622	no
gene:FBgn0005614	gene:FBgn0005614	trpl	2R:9753696-9765518	Control	HA	OK	50.8158	42.3311	-0.263559	-1.30399	0.0243	0.168622	no
gene:FBgn0014007	gene:FBgn0014007	Ptp69D	3L:12734944-12741568	Control	HA	OK	6.75224	8.13637	0.269019	1.33376	0.02435	0.168622	no
gene:FBgn0015808	gene:FBgn0015808	ScpX	2L:18831228-18833630	Control	HA	OK	71.0673	59.6164	-0.253478	-1.2735	0.02425	0.168622	no
gene:FBgn0026259	gene:FBgn0026259	eIF5B	3L:3428657-3460977	Control	HA	OK	46.0585	55.0768	0.257977	1.29771	0.02435	0.168622	no
gene:FBgn0031762	gene:FBgn0031762	CG9098	2L:6007363-6012338	Control	HA	OK	3.27281	4.22402	0.368086	1.28868	0.02425	0.168622	no
gene:FBgn0033166	gene:FBgn0033166	Eaf	2R:7396849-7407819	Control	HA	OK	13.8388	17.412	0.331363	1.3177	0.0242	0.168622	no
gene:FBgn0033731	gene:FBgn0033731	Cpr49Ah	2R:12413961-12415170	Control	HA	OK	7.38469	10.0143	0.439448	1.28047	0.02425	0.168622	no
gene:FBgn0036772	gene:FBgn0036772	CG5290	3L:17908142-17912565	Control	HA	OK	10.067	12.5701	0.320369	1.29035	0.02435	0.168622	no
gene:FBgn0053828	gene:FBgn0053828	His1:CG33828	2L:21476301-21477324	Control	HA	OK	5.49991	7.83347	0.510244	1.34494	0.02425	0.168622	no
gene:FBgn0058439	gene:FBgn0058439	CG40439	2L:22797518-22798276	Control	HA	OK	84.6967	70.3201	-0.268367	-1.3202	0.0243	0.168622	no
gene:FBgn0029873	gene:FBgn0029873	CG3918	X:6524463-6527888	Control	HA	OK	21.0174	26.2863	0.322722	1.28965	0.0244	0.168864	no
gene:FBgn0037288	gene:FBgn0037288	CG14661	3R:4953505-4955252	Control	HA	OK	167.667	140.357	-0.256499	-1.29032	0.02445	0.169105	no
gene:FBgn0039868	gene:FBgn0039868	CG11563	3R:31737034-31737999	Control	HA	OK	35.6663	43.648	0.291354	1.29652	0.02455	0.169691	no
gene:FBgn0031820	gene:FBgn0031820	Daxx	2L:6480660-6488756	Control	HA	OK	9.28726	11.3012	0.283148	1.30222	0.0246	0.169932	no
gene:FBgn0032669	gene:FBgn0032669	CG15155	2L:18154850-18155942	Control	HA	OK	111.329	92.9216	-0.260748	-1.29352	0.0247	0.170412	no
gene:FBgn0036887	gene:FBgn0036887	CG9231	3L:19585092-19586003	Control	HA	OK	199.06	166.785	-0.255209	-1.29387	0.0247	0.170412	no
gene:FBgn0035039	gene:FBgn0035039	Adck	2R:24607266-24615158	Control	HA	OK	12.8975	17.4579	0.436794	1.29494	0.0248	0.17089	no
gene:FBgn0052267	gene:FBgn0052267	CG32267	3L:3471554-3472113	Control	HA	OK	129.293	156.018	0.271067	1.29056	0.0248	0.17089	no
gene:FBgn0263038	gene:FBgn0263038	CG43333	2L:14163507-14180686	Control	HA	OK	4.83113	3.88974	-0.312686	-1.29287	0.0249	0.171474	no
gene:FBgn0023489	gene:FBgn0023489	Pph13	2L:577485-579549	Control	HA	OK	2.89452	2.05659	-0.493067	-1.32386	0.025	0.172056	no
gene:FBgn0034962	gene:FBgn0034962	MAN1	2R:24033973-24036707	Control	HA	OK	29.2463	34.9654	0.257674	1.27754	0.02505	0.172188	no
gene:FBgn0264270	gene:FBgn0264270	Sxl	X:7074549-7098053	Control	HA	OK	41.4911	33.7493	-0.297942	-1.30754	0.02505	0.172188	no
gene:FBgn0015905	gene:FBgn0015905	ast	2L:1077947-1080803	Control	HA	OK	7.11988	8.84204	0.312526	1.28464	0.0251	0.172425	no
gene:FBgn0036157	gene:FBgn0036157	CG7560	3L:11425157-11426395	Control	HA	OK	6.26403	4.53137	-0.467145	-1.30815	0.02515	0.172663	no
gene:FBgn0013954	gene:FBgn0013954	FK506-bp2	2R:19290108-19290962	Control	HA	OK	1257.48	1041.16	-0.272343	-1.30191	0.0252	0.172818	no
gene:FBgn0043533	gene:FBgn0043533	Obp56f	2R:19713394-19713976	Control	HA	OK	0.595537	0.14828	-2.00587	-1.02324	0.02525	0.172818	no
gene:FBgn0053506	gene:FBgn0053506	CG33506	2R:14855428-14858640	Control	HA	OK	28.9808	36.3119	0.325349	1.32497	0.02525	0.172818	no
gene:FBgn0053890	gene:FBgn0053890	His2B:CG33890	2L:21482503-21483098	Control	HA	OK	4.582	2.66297	-0.782939	-1.35652	0.02525	0.172818	no
gene:FBgn0250819	gene:FBgn0250819	CG33521	4:1185767-1196848	Control	HA	OK	94.1739	74.9714	-0.328986	-1.34056	0.02525	0.172818	no
gene:FBgn0030425	gene:FBgn0030425	CG3775	X:12785562-12897327	Control	HA	OK	10.3988	7.87532	-0.401003	-1.29284	0.0253	0.172842	no
gene:FBgn0032297	gene:FBgn0032297	CG17124	2L:10744074-10756325	Control	HA	OK	73.5809	59.6999	-0.301604	-1.30013	0.0253	0.172842	no
gene:FBgn0036450	gene:FBgn0036450	Tdrd3	3L:14786790-14789665	Control	HA	OK	18.0645	21.8181	0.272368	1.28424	0.0253	0.172842	no
gene:FBgn0053810	gene:FBgn0053810	His1:CG33810	2L:21437010-21438033	Control	HA	OK	5.56468	7.87993	0.501884	1.33271	0.02535	0.173078	no
gene:FBgn0015033	gene:FBgn0015033	Cyp4d8	3L:7493556-7496179	Control	HA	OK	9.95182	7.82874	-0.346179	-1.28204	0.0254	0.173207	no
gene:FBgn0035642	gene:FBgn0035642	CG18586	3L:5871500-5875466	Control	HA	OK	19.2003	14.2101	-0.434218	-1.28823	0.0254	0.173207	no
gene:FBgn0014092	gene:FBgn0014092	CG4278	2L:16327068-16329132	Control	HA	OK	35.7777	47.6524	0.41349	1.29606	0.02545	0.173336	no
gene:FBgn0037386	gene:FBgn0037386	CG1208	3R:5830061-5838782	Control	HA	OK	10.9389	8.59317	-0.348206	-1.29014	0.02545	0.173336	no
gene:FBgn0033127	gene:FBgn0033127	Tsp42Ef	2R:7025009-7028082	Control	HA	OK	55.6846	46.444	-0.261786	-1.3038	0.02565	0.174167	no
gene:FBgn0034307	gene:FBgn0034307	CG10914	2R:18158256-18160310	Control	HA	OK	4.47645	5.86925	0.390823	1.28685	0.02565	0.174167	no
gene:FBgn0046302	gene:FBgn0046302	CG10650	2L:18993359-18995934	Control	HA	OK	47.4897	39.1648	-0.278057	-1.282	0.02565	0.174167	no
gene:FBgn0260474	gene:FBgn0260474	CG30002	2R:9704383-9706147	Control	HA	OK	5.68968	4.39217	-0.373413	-1.26952	0.0256	0.174167	no
gene:FBgn0265200	gene:FBgn0265200	CR44260	3R:7720048-7721124	Control	HA	OK	1.02228	0.484941	-1.07592	-1.49513	0.02565	0.174167	no
gene:FBgn0035805	gene:FBgn0035805	CG7506	3L:7640797-7641648	Control	HA	OK	30.5356	37.4361	0.293939	1.28333	0.0258	0.175079	no
gene:FBgn0002872	gene:FBgn0002872	mu2	3L:1941067-1947475	Control	HA	OK	11.8856	14.5921	0.295972	1.27789	0.0259	0.175225	no
gene:FBgn0010241	gene:FBgn0010241	Mdr50	2R:14246965-14252597	Control	HA	OK	4.87556	3.9325	-0.310122	-1.28843	0.0259	0.175225	no
gene:FBgn0032189	gene:FBgn0032189	Ripalpha	2L:10199400-10200974	Control	HA	OK	23.8837	29.2402	0.291931	1.32617	0.02585	0.175225	no
gene:FBgn0033339	gene:FBgn0033339	Sec31	2R:8893612-8900211	Control	HA	OK	15.8862	19.3806	0.28684	1.29015	0.0259	0.175225	no
gene:FBgn0261987	gene:FBgn0261987	Pxt	3R:17719453-17722955	Control	HA	OK	99.0378	118.901	0.263711	1.27907	0.0259	0.175225	no
gene:FBgn0031392	gene:FBgn0031392	AIF	2L:2151753-2155389	Control	HA	OK	19.1871	22.9863	0.26064	1.2792	0.02595	0.175351	no
gene:FBgn0035968	gene:FBgn0035968	Slc45-1	3L:9203064-9208853	Control	HA	OK	12.6583	10.4363	-0.278465	-1.2753	0.02595	0.175351	no
gene:FBgn0021796	gene:FBgn0021796	Tor	2L:13004479-13013197	Control	HA	OK	4.60122	5.54828	0.270024	1.27277	0.026	0.175583	no
gene:FBgn0033702	gene:FBgn0033702	CG8854	2R:12224460-12229310	Control	HA	OK	5.95528	4.42656	-0.427982	-1.29147	0.02605	0.175814	no
gene:FBgn0036545	gene:FBgn0036545	GXIVsPLA2	3L:15955095-15956465	Control	HA	OK	31.8406	25.9109	-0.297306	-1.30834	0.0261	0.175832	no
gene:FBgn0037670	gene:FBgn0037670	Ibf1	3R:9258963-9260400	Control	HA	OK	7.49128	10.1521	0.438496	1.33412	0.0261	0.175832	no
gene:FBgn0052039	gene:FBgn0052039	CG32039	3L:9358998-9359996	Control	HA	OK	47.6902	37.9453	-0.32977	-1.33435	0.0261	0.175832	no
gene:FBgn0022709	gene:FBgn0022709	Adk1	3L:12200321-12204082	Control	HA	OK	131.531	110.08	-0.256854	-1.26749	0.0262	0.176293	no
gene:FBgn0053926	gene:FBgn0053926	CG33926	3L:9443231-9446388	Control	HA	OK	6.23551	4.15679	-0.585037	-1.31381	0.0262	0.176293	no
gene:FBgn0030257	gene:FBgn0030257	SmydA-4	X:11044755-11049540	Control	HA	OK	11.4825	9.35691	-0.295331	-1.30314	0.0263	0.17686	no
gene:FBgn0013987	gene:FBgn0013987	MAPk-Ak2	X:5759907-5764203	Control	HA	OK	56.8672	47.1252	-0.271097	-1.28377	0.02635	0.177089	no
gene:FBgn0053829	gene:FBgn0053829	His2A:CG33829	2L:21478183-21478676	Control	HA	OK	68.9084	55.2297	-0.319235	-1.28396	0.0264	0.177212	no
gene:FBgn0265660	gene:FBgn0265660	CR44467	2R:16849094-16849895	Control	HA	OK	1.16854	0.503302	-1.21521	-1.44574	0.0264	0.177212	no
gene:FBgn0015615	gene:FBgn0015615	SMC3	X:16588995-16593439	Control	HA	OK	12.1727	14.6932	0.271499	1.28518	0.02645	0.177228	no
gene:FBgn0020521	gene:FBgn0020521	pio	2R:24581244-24597862	Control	HA	OK	19.4725	23.6265	0.27897	1.29098	0.02645	0.177228	no
gene:FBgn0032668	gene:FBgn0032668	CG17681	2L:18153122-18154516	Control	HA	OK	0.67869	0.329988	-1.04034	-1.39523	0.02645	0.177228	no
gene:FBgn0026380	gene:FBgn0026380	Prosbeta3	3R:9004016-9006226	Control	HA	OK	189.817	238.069	0.326769	1.26923	0.0266	0.178019	no
gene:FBgn0031574	gene:FBgn0031574	CG3964	2L:3862667-3867507	Control	HA	OK	3.54373	4.51864	0.35062	1.28414	0.0266	0.178019	no
gene:FBgn0038704	gene:FBgn0038704	CG5316	3R:19403454-19406294	Control	HA	OK	12.7638	15.5276	0.282769	1.2721	0.02665	0.178247	no
gene:FBgn0028343	gene:FBgn0028343	Ankle2	X:17571853-17579229	Control	HA	OK	23.573	28.2026	0.258695	1.2873	0.0267	0.178474	no
gene:FBgn0023178	gene:FBgn0023178	Pdf	3R:26455461-26456141	Control	HA	OK	7.78818	5.48887	-0.504778	-1.28882	0.0269	0.179596	no
gene:FBgn0063449	gene:FBgn0063449	Uhg2	2L:9893804-9895003	Control	HA	OK	249.017	206.909	-0.267247	-1.26839	0.0269	0.179596	no
gene:FBgn0024913	gene:FBgn0024913	Actbeta	4:1077330-1084796	Control	HA	OK	2.37508	1.81807	-0.38557	-1.32096	0.027	0.180156	no
gene:FBgn0030241	gene:FBgn0030241	feo	X:10852445-10854869	Control	HA	OK	38.2981	45.8735	0.26039	1.2718	0.02705	0.180167	no
gene:FBgn0037473	gene:FBgn0037473	CG10068	3R:7124547-7128027	Control	HA	OK	24.9737	19.6998	-0.342228	-1.28801	0.02705	0.180167	no
gene:FBgn0058470	gene:FBgn0058470	CG40470	3L:23839859-23986410	Control	HA	OK	1.63731	1.17683	-0.476422	-1.34545	0.02705	0.180167	no
gene:FBgn0033663	gene:FBgn0033663	ERp60	2R:11886066-11890979	Control	HA	OK	278.77	334.88	0.264569	1.25039	0.0271	0.180284	no
gene:FBgn0039269	gene:FBgn0039269	veli	3R:25064417-25065591	Control	HA	OK	89.2723	74.6873	-0.257351	-1.27306	0.0271	0.180284	no
gene:FBgn0036391	gene:FBgn0036391	CG17364	3L:13977904-13993400	Control	HA	OK	2.96821	2.30788	-0.363022	-1.26784	0.02715	0.180509	no
gene:FBgn0003249	gene:FBgn0003249	Rh3	3R:20081059-20082450	Control	HA	OK	52.0444	43.5841	-0.255941	-1.27078	0.0272	0.180734	no
gene:FBgn0003459	gene:FBgn0003459	stwl	3L:14402929-14409939	Control	HA	OK	5.28332	6.54835	0.309687	1.2709	0.02725	0.180959	no
gene:FBgn0039338	gene:FBgn0039338	XNP	3R:25477867-25482834	Control	HA	OK	20.3177	24.2221	0.253583	1.26232	0.0273	0.181183	no
gene:FBgn0016053	gene:FBgn0016053	pgc	2R:22329725-22332813	Control	HA	OK	437.677	364.902	-0.262358	-1.31258	0.02735	0.181299	no
gene:FBgn0038275	gene:FBgn0038275	CG3817	3R:14898738-14900277	Control	HA	OK	32.6003	40.4545	0.311416	1.25983	0.02735	0.181299	no
gene:FBgn0034392	gene:FBgn0034392	MFS15	2R:18794617-18796678	Control	HA	OK	14.7465	12.1273	-0.282122	-1.28452	0.0274	0.181415	no
gene:FBgn0034437	gene:FBgn0034437	CG10051	2R:19363640-19373702	Control	HA	OK	2.82837	1.75832	-0.685769	-1.27674	0.0274	0.181415	no
gene:FBgn0001123	gene:FBgn0001123	Galphas	2R:23942537-23946936	Control	HA	OK	22.0873	18.2091	-0.278558	-1.27488	0.0275	0.181862	no
gene:FBgn0019686	gene:FBgn0019686	lok	2L:20061421-20065679	Control	HA	OK	71.7732	87.4755	0.285434	1.2742	0.0275	0.181862	no
gene:FBgn0032033	gene:FBgn0032033	CG13392	2L:8381820-8382807	Control	HA	OK	20.4755	25.9672	0.342787	1.2614	0.02755	0.181977	no
gene:FBgn0033934	gene:FBgn0033934	CG17385	2R:14409294-14411572	Control	HA	OK	96.3002	79.9438	-0.268553	-1.26658	0.02755	0.181977	no
gene:FBgn0038870	gene:FBgn0038870	Oga	3R:21219076-21223584	Control	HA	OK	6.62319	8.71447	0.395886	1.26542	0.02765	0.182529	no
gene:FBgn0032052	gene:FBgn0032052	PIG-U	2L:8515095-8517380	Control	HA	OK	21.2855	27.1831	0.352835	1.26799	0.0277	0.182643	no
gene:FBgn0261268	gene:FBgn0261268	Cul3	2L:15265244-15272024	Control	HA	OK	18.6595	22.5085	0.270558	1.28776	0.0277	0.182643	no
gene:FBgn0036984	gene:FBgn0036984	CG13248	3L:20404269-20410566	Control	HA	OK	1.27714	0.894383	-0.513956	-1.25991	0.02775	0.182865	no
gene:FBgn0263705	gene:FBgn0263705	Myo10A	X:10930839-10967134	Control	HA	OK	1.09917	1.42929	0.378882	1.28578	0.0278	0.183086	no
gene:FBgn0027086	gene:FBgn0027086	IleRS	3L:22288664-22292810	Control	HA	OK	37.0215	44.15	0.25405	1.26019	0.02785	0.183199	no
gene:FBgn0027330	gene:FBgn0027330	l(1)G0020	X:8714935-8720277	Control	HA	OK	10.1383	13.6578	0.429914	1.28173	0.02785	0.183199	no
gene:FBgn0002878	gene:FBgn0002878	mus101	X:13722245-13727113	Control	HA	OK	2.82942	3.55881	0.330885	1.2693	0.0279	0.18342	no
gene:FBgn0010358	gene:FBgn0010358	deltaTry	2R:11355318-11356600	Control	HA	OK	206.496	173.22	-0.253509	-1.35499	0.02795	0.183641	no
gene:FBgn0035312	gene:FBgn0035312	CG15820	3L:2172994-2174332	Control	HA	OK	9.17757	11.723	0.353159	1.26107	0.028	0.183861	no
gene:FBgn0004390	gene:FBgn0004390	RasGAP1	3L:9839092-9855285	Control	HA	OK	6.73262	8.09428	0.265735	1.27651	0.02815	0.184521	no
gene:FBgn0039040	gene:FBgn0039040	CG13833	3R:23033283-23035563	Control	HA	OK	10.105	7.71717	-0.388921	-1.27683	0.02815	0.184521	no
gene:FBgn0053255	gene:FBgn0053255	CR33255	3L:19420389-19424183	Control	HA	OK	50.0424	25.3945	-0.978634	-1.42837	0.02815	0.184521	no
gene:FBgn0001974	gene:FBgn0001974	l(2)35Bd	2L:15009938-15011764	Control	HA	OK	14.0234	17.189	0.293647	1.27894	0.02835	0.185179	no
gene:FBgn0029899	gene:FBgn0029899	CG14438	X:6756321-6770712	Control	HA	OK	3.28483	4.16104	0.341126	1.26895	0.0283	0.185179	no
gene:FBgn0035121	gene:FBgn0035121	Tudor-SN	3L:258175-264380	Control	HA	OK	109.333	132.243	0.274456	1.25588	0.02835	0.185179	no
gene:FBgn0035405	gene:FBgn0035405	CG15812	3L:3159990-3162019	Control	HA	OK	11.2297	13.8448	0.302025	1.24756	0.02835	0.185179	no
gene:FBgn0036897	gene:FBgn0036897	CG8786	3L:19637206-19642816	Control	HA	OK	5.99298	7.6328	0.348938	1.29281	0.02835	0.185179	no
gene:FBgn0037678	gene:FBgn0037678	CG16749	3R:9330884-9331885	Control	HA	OK	83.7294	70.1366	-0.255567	-1.26029	0.0283	0.185179	no
gene:FBgn0039709	gene:FBgn0039709	Cad99C	3R:29841656-29857491	Control	HA	OK	5.96629	7.65179	0.358963	1.25252	0.02845	0.185724	no
gene:FBgn0039349	gene:FBgn0039349	Ssadh	3R:25624804-25626924	Control	HA	OK	50.9143	42.6753	-0.25467	-1.27799	0.0285	0.185941	no
gene:FBgn0011232	gene:FBgn0011232	scat	2L:9431404-9435341	Control	HA	OK	9.60087	11.5916	0.271844	1.2655	0.0286	0.186485	no
gene:FBgn0005198	gene:FBgn0005198	gig	3L:20129180-20139010	Control	HA	OK	5.89014	7.10081	0.26968	1.26278	0.0288	0.187679	no
gene:FBgn0031851	gene:FBgn0031851	Aatf	2L:6717624-6719389	Control	HA	OK	28.0866	33.847	0.269146	1.2512	0.02885	0.187786	no
gene:FBgn0034814	gene:FBgn0034814	CG9890	2R:23062746-23064260	Control	HA	OK	16.1222	19.7886	0.295619	1.25296	0.02885	0.187786	no
gene:FBgn0024244	gene:FBgn0024244	drm	2L:3539246-3548423	Control	HA	OK	7.49615	5.98416	-0.325001	-1.30197	0.0289	0.187892	no
gene:FBgn0029826	gene:FBgn0029826	CG6041	X:5945681-5950208	Control	HA	OK	8.51403	5.77932	-0.558942	-1.27931	0.0289	0.187892	no
gene:FBgn0027934	gene:FBgn0027934	alpha-Est4aPsi	3R:7524566-7528777	Control	HA	OK	0.927499	0.456077	-1.02407	-1.31808	0.029	0.187995	no
gene:FBgn0028695	gene:FBgn0028695	Rpn1	3L:19915050-19918160	Control	HA	OK	74.5676	88.9783	0.254906	1.27846	0.02895	0.187995	no
gene:FBgn0038722	gene:FBgn0038722	Nup58	3R:19645025-19646906	Control	HA	OK	17.7403	21.4293	0.272552	1.26735	0.02895	0.187995	no
gene:FBgn0051547	gene:FBgn0051547	NKCC	3R:5489504-5502702	Control	HA	OK	5.2161	6.43918	0.303907	1.25356	0.029	0.187995	no
gene:FBgn0262484	gene:FBgn0262484	CG43074	3L:3472446-3510895	Control	HA	OK	576.694	476.07	-0.276631	-1.27616	0.029	0.187995	no
gene:FBgn0033679	gene:FBgn0033679	CG8888	2R:12064564-12079543	Control	HA	OK	8.42201	10.6828	0.34306	1.26769	0.0291	0.188424	no
gene:FBgn0250814	gene:FBgn0250814	UQCR-C2	3L:16584123-16587057	Control	HA	OK	787.566	649.698	-0.277632	-1.27469	0.0291	0.188424	no
gene:FBgn0013756	gene:FBgn0013756	Mtor	2R:11852616-11861202	Control	HA	OK	20.0494	23.8643	0.251298	1.25149	0.02915	0.188529	no
gene:FBgn0016131	gene:FBgn0016131	Cdk4	2R:16579469-16585448	Control	HA	OK	21.8128	26.5862	0.285502	1.26814	0.02915	0.188529	no
gene:FBgn0000318	gene:FBgn0000318	cl	2L:5520134-5523898	Control	HA	OK	278.88	227.556	-0.293422	-1.27114	0.02935	0.188729	no
gene:FBgn0002985	gene:FBgn0002985	odd	2L:3604223-3606756	Control	HA	OK	5.13252	3.95283	-0.376782	-1.25977	0.0293	0.188729	no
gene:FBgn0027495	gene:FBgn0027495	Smyd4-4	2R:12140630-12144552	Control	HA	OK	16.9274	20.3857	0.268198	1.24376	0.02925	0.188729	no
gene:FBgn0032187	gene:FBgn0032187	CG4839	2L:10064120-10180256	Control	HA	OK	5.80011	4.56259	-0.346228	-1.27023	0.02935	0.188729	no
gene:FBgn0032773	gene:FBgn0032773	fon	2L:19383137-19386205	Control	HA	OK	86.3445	72.391	-0.254294	-1.27151	0.02935	0.188729	no
gene:FBgn0036733	gene:FBgn0036733	U4-U6-60K	3L:17511854-17513912	Control	HA	OK	6.84316	8.4638	0.306642	1.27022	0.02925	0.188729	no
gene:FBgn0039312	gene:FBgn0039312	CG10514	3R:25278426-25279846	Control	HA	OK	180.04	151.813	-0.246023	-1.22643	0.02925	0.188729	no
gene:FBgn0052423	gene:FBgn0052423	shep	3L:5155820-5277944	Control	HA	OK	27.0023	33.4173	0.307513	1.26984	0.02935	0.188729	no
gene:FBgn0263321	gene:FBgn0263321	CG43402	2L:1442626-1443832	Control	HA	OK	129.764	105.747	-0.295276	-1.35749	0.0292	0.188729	no
gene:FBgn0265203	gene:FBgn0265203	CR44263	3R:31758709-31759360	Control	HA	OK	8.84637	6.25983	-0.498962	-1.26125	0.02935	0.188729	no
gene:FBgn0033799	gene:FBgn0033799	GLaz	2R:13163958-13168032	Control	HA	OK	18.0383	14.4639	-0.318607	-1.24843	0.02945	0.189154	no
gene:FBgn0038388	gene:FBgn0038388	CG4287	3R:15962166-15963867	Control	HA	OK	58.4864	49.2724	-0.247323	-1.2423	0.02945	0.189154	no
gene:FBgn0052843	gene:FBgn0052843	Dh31-R	2R:13267797-13295927	Control	HA	OK	3.96318	3.12134	-0.344492	-1.26533	0.0295	0.189367	no
gene:FBgn0051663	gene:FBgn0051663	CG31663	2L:1858608-1881480	Control	HA	OK	5.20578	4.20345	-0.308541	-1.26534	0.02955	0.18947	no
gene:FBgn0259937	gene:FBgn0259937	Nop60B	2R:24174876-24186343	Control	HA	OK	166.201	199.583	0.264058	1.27556	0.02955	0.18947	no
gene:FBgn0016041	gene:FBgn0016041	Tom40	X:7736892-7739978	Control	HA	OK	62.1248	75.2402	0.276335	1.25325	0.0296	0.189681	no
gene:FBgn0010786	gene:FBgn0010786	l(3)02640	3L:1333238-1339415	Control	HA	OK	38.404	46.2457	0.268062	1.25863	0.02965	0.189893	no
gene:FBgn0030617	gene:FBgn0030617	CG9095	X:15139936-15163225	Control	HA	OK	0.374874	0.567267	0.597624	1.2578	0.0297	0.190104	no
gene:FBgn0002791	gene:FBgn0002791	mr	2R:23972430-23975408	Control	HA	OK	9.53115	11.5544	0.277718	1.25366	0.02975	0.190315	no
gene:FBgn0040250	gene:FBgn0040250	Ugt86Dj	3R:11173440-11175408	Control	HA	OK	4.44753	3.39667	-0.388884	-1.23698	0.0298	0.190416	no
gene:FBgn0259111	gene:FBgn0259111	Ndae1	2L:7223327-7249343	Control	HA	OK	13.9283	11.6248	-0.260812	-1.25173	0.0298	0.190416	no
gene:FBgn0032465	gene:FBgn0032465	CG12404	2L:12993756-13000635	Control	HA	OK	21.1293	25.4936	0.270886	1.26272	0.02985	0.190518	no
gene:FBgn0265605	gene:FBgn0265605	Ric	2R:16107439-16110017	Control	HA	OK	25.8194	21.6776	-0.252251	-1.33326	0.02985	0.190518	no
gene:FBgn0003277	gene:FBgn0003277	RpII215	X:11562799-11570326	Control	HA	OK	9.88399	11.7271	0.246679	1.22878	0.0299	0.190619	no
gene:FBgn0035359	gene:FBgn0035359	CG1143	3L:2645367-2647192	Control	HA	OK	13.0629	16.7109	0.355323	1.2764	0.0299	0.190619	no
gene:FBgn0039311	gene:FBgn0039311	CG10513	3R:25275789-25277212	Control	HA	OK	96.3945	81.2172	-0.247167	-1.23534	0.02995	0.19072	no
gene:FBgn0052551	gene:FBgn0052551	CG32551	X:18435718-18440581	Control	HA	OK	22.8546	13.6315	-0.745533	-1.32999	0.02995	0.19072	no
gene:FBgn0052726	gene:FBgn0052726	CG32726	X:7425219-7425743	Control	HA	OK	33.3456	23.809	-0.485991	-1.27357	0.03	0.190929	no
gene:FBgn0262353	gene:FBgn0262353	CR43051	2L:12455539-12546611	Control	HA	OK	92.1275	50.6549	-0.862931	-1.28273	0.03005	0.191139	no
gene:FBgn0026370	gene:FBgn0026370	SRPK	2R:15376618-15387851	Control	HA	OK	27.784	34.9472	0.330918	1.24699	0.03015	0.19123	no
gene:FBgn0031708	gene:FBgn0031708	CG7382	2L:5517736-5519896	Control	HA	OK	41.5412	34.4404	-0.270442	-1.26001	0.0301	0.19123	no
gene:FBgn0031872	gene:FBgn0031872	ihog	2L:6945463-6948808	Control	HA	OK	3.24527	4.12722	0.346833	1.25608	0.0301	0.19123	no
gene:FBgn0051151	gene:FBgn0051151	wge	3R:22710882-22721150	Control	HA	OK	13.269	15.7736	0.249452	1.24813	0.03015	0.19123	no
gene:FBgn0051427	gene:FBgn0051427	CR31427	3R:29238829-29240308	Control	HA	OK	0.81314	0.432759	-0.909941	-1.31659	0.03015	0.19123	no
gene:FBgn0000064	gene:FBgn0000064	Ald	3R:26254068-26261591	Control	HA	OK	1624.98	1240.62	-0.389364	-1.25715	0.0302	0.191438	no
gene:FBgn0033629	gene:FBgn0033629	Tsp47F	2R:11377192-11379177	Control	HA	OK	1.1744	0.703563	-0.73917	-1.26515	0.03025	0.191646	no
gene:FBgn0037934	gene:FBgn0037934	CG6830	3R:11679742-11684342	Control	HA	OK	9.60034	6.83914	-0.489271	-1.26534	0.0303	0.191854	no
gene:FBgn0036891	gene:FBgn0036891	CG9372	3L:19606207-19612199	Control	HA	OK	12.7661	8.81441	-0.534381	-1.2557	0.03035	0.192062	no
gene:FBgn0026263	gene:FBgn0026263	bip1	3L:8054332-8058713	Control	HA	OK	24.6488	29.6942	0.268662	1.23317	0.03045	0.192367	no
gene:FBgn0039691	gene:FBgn0039691	IntS11	3R:29745208-29747513	Control	HA	OK	30.9369	36.8532	0.252462	1.2392	0.03045	0.192367	no
gene:FBgn0040923	gene:FBgn0040923	CG11368	X:7452208-7452643	Control	HA	OK	164.46	135.679	-0.277539	-1.25973	0.03045	0.192367	no
gene:FBgn0037135	gene:FBgn0037135	CG7414	3L:21824739-21828480	Control	HA	OK	216.577	260.937	0.268822	1.25992	0.0305	0.192466	no
gene:FBgn0038740	gene:FBgn0038740	CG4562	3R:19864495-19875678	Control	HA	OK	15.1313	11.6923	-0.371972	-1.25472	0.0305	0.192466	no
gene:FBgn0020261	gene:FBgn0020261	pcm	X:19485758-19492011	Control	HA	OK	10.4833	12.5923	0.264448	1.26223	0.0306	0.19277	no
gene:FBgn0085359	gene:FBgn0085359	CG34330	X:19068274-19068973	Control	HA	OK	204.972	172.915	-0.245359	-1.28313	0.0306	0.19277	no
gene:FBgn0259834	gene:FBgn0259834	out	X:19310512-19322106	Control	HA	OK	23.6346	19.796	-0.255695	-1.26483	0.0306	0.19277	no
gene:FBgn0028692	gene:FBgn0028692	Rpn2	3R:29153523-29157255	Control	HA	OK	59.1116	70.2665	0.249395	1.25034	0.03065	0.192976	no
gene:FBgn0284246	gene:FBgn0284246	l(2)k09848	2R:6074470-6076367	Control	HA	OK	25.7511	31.0843	0.271552	1.26435	0.0307	0.193182	no
gene:FBgn0026777	gene:FBgn0026777	Rad23	4:308092-310822	Control	HA	OK	91.6861	109.74	0.259313	1.26821	0.03085	0.194016	no
gene:FBgn0003655	gene:FBgn0003655	swa	X:6363417-6365708	Control	HA	OK	71.7684	85.1939	0.247401	1.23988	0.0309	0.194221	no
gene:FBgn0003117	gene:FBgn0003117	pnr	3R:16026078-16041796	Control	HA	OK	0.829303	0.552618	-0.585617	-1.22398	0.031	0.19463	no
gene:FBgn0284220	gene:FBgn0284220	Top2	2L:19447364-19453490	Control	HA	OK	47.0019	55.8881	0.24982	1.23156	0.031	0.19463	no
gene:FBgn0002431	gene:FBgn0002431	hyd	3R:9711141-9725615	Control	HA	OK	11.8065	14.5609	0.302521	1.21573	0.0311	0.194929	no
gene:FBgn0030839	gene:FBgn0030839	CG5613	X:17422319-17443994	Control	HA	OK	5.10282	3.87972	-0.395344	-1.24903	0.0311	0.194929	no
gene:FBgn0264341	gene:FBgn0264341	CG43797	2L:4000017-4000806	Control	HA	OK	1.26965	0.699923	-0.859162	-1.28065	0.0311	0.194929	no
gene:FBgn0029676	gene:FBgn0029676	HIP-R	X:3789968-3792477	Control	HA	OK	65.3871	77.3354	0.242122	1.23551	0.03115	0.195133	no
gene:FBgn0039560	gene:FBgn0039560	BOD1	3R:27938244-27942778	Control	HA	OK	11.1978	13.4634	0.26583	1.23954	0.0312	0.195337	no
gene:FBgn0010173	gene:FBgn0010173	RpA-70	3R:8262119-8264451	Control	HA	OK	64.3888	76.4144	0.247036	1.23488	0.03125	0.195431	no
gene:FBgn0037513	gene:FBgn0037513	pyd3	3R:7747912-7750079	Control	HA	OK	45.9462	38.4618	-0.256521	-1.23326	0.03125	0.195431	no
gene:FBgn0034796	gene:FBgn0034796	CG3700	2R:22894434-22895745	Control	HA	OK	16.0459	19.8387	0.30612	1.25196	0.03135	0.195946	no
gene:FBgn0027490	gene:FBgn0027490	D12	2L:8434057-8437365	Control	HA	OK	5.30923	6.60302	0.314623	1.24638	0.0314	0.196039	no
gene:FBgn0030434	gene:FBgn0030434	Brms1	X:12907985-12909622	Control	HA	OK	23.6239	28.6155	0.276552	1.22574	0.0314	0.196039	no
gene:FBgn0033901	gene:FBgn0033901	O-fut1	2R:14161429-14163054	Control	HA	OK	27.03	22.5365	-0.262298	-1.23623	0.0315	0.196334	no
gene:FBgn0037051	gene:FBgn0037051	CG10565	3L:21131445-21136353	Control	HA	OK	66.7199	79.1615	0.246682	1.22625	0.0315	0.196334	no
gene:FBgn0052633	gene:FBgn0052633	CG32633	X:13561670-13563359	Control	HA	OK	46.7418	38.1996	-0.291156	-1.24412	0.0315	0.196334	no
gene:FBgn0260011	gene:FBgn0260011	NimC4	2L:14040169-14094401	Control	HA	OK	11.3178	8.43668	-0.423841	-1.29322	0.03155	0.196426	no
gene:FBgn0260780	gene:FBgn0260780	wisp	X:11893942-11899920	Control	HA	OK	49.6872	59.2875	0.254855	1.23892	0.03155	0.196426	no
gene:FBgn0033587	gene:FBgn0033587	CG13218	2R:11233191-11233714	Control	HA	OK	1.85327	0.801452	-1.20939	-1.31345	0.0316	0.196628	no
gene:FBgn0030641	gene:FBgn0030641	CG6299	X:15462721-15467757	Control	HA	OK	60.1678	45.7855	-0.394099	-1.28243	0.03165	0.19672	no
gene:FBgn0042104	gene:FBgn0042104	CG18747	3R:7780883-7783446	Control	HA	OK	5.35061	4.03542	-0.406986	-1.24026	0.03165	0.19672	no
gene:FBgn0030927	gene:FBgn0030927	CG15046	X:18487449-18489620	Control	HA	OK	1.63701	1.11767	-0.550574	-1.25242	0.0318	0.197542	no
gene:FBgn0083167	gene:FBgn0083167	Neb-cGP	X:10460735-10477201	Control	HA	OK	2948.69	2319.25	-0.346417	-1.26021	0.03185	0.197743	no
gene:FBgn0040299	gene:FBgn0040299	Myo28B1	2L:7642004-7691061	Control	HA	OK	4.07204	2.59161	-0.651901	-1.23806	0.0319	0.197943	no
gene:FBgn0010053	gene:FBgn0010053	Jheh1	2R:18853433-18855087	Control	HA	OK	39.6822	33.3673	-0.250059	-1.23026	0.032	0.198103	no
gene:FBgn0032415	gene:FBgn0032415	rho-6	2L:12130515-12133411	Control	HA	OK	0.683485	0.265064	-1.36657	-1.27089	0.03205	0.198103	no
gene:FBgn0033899	gene:FBgn0033899	CG13016	2R:14157761-14161262	Control	HA	OK	7.11111	9.60016	0.432984	1.24246	0.03205	0.198103	no
gene:FBgn0034913	gene:FBgn0034913	Snap29	2R:23843482-23844763	Control	HA	OK	75.8229	63.6656	-0.25212	-1.23503	0.03205	0.198103	no
gene:FBgn0036359	gene:FBgn0036359	CG14105	3L:13425890-13426673	Control	HA	OK	16.3562	12.1022	-0.434573	-1.27637	0.032	0.198103	no
gene:FBgn0037107	gene:FBgn0037107	CG7166	3L:21619999-21625647	Control	HA	OK	1.70719	1.2816	-0.413672	-1.29903	0.03205	0.198103	no
gene:FBgn0085322	gene:FBgn0085322	CG34293	3R:27163123-27165575	Control	HA	OK	40.3298	31.477	-0.357547	-1.2482	0.03205	0.198103	no
gene:FBgn0000158	gene:FBgn0000158	bam	3R:25242019-25245057	Control	HA	OK	7.3589	9.25606	0.330908	1.23858	0.0321	0.198302	no
gene:FBgn0039738	gene:FBgn0039738	Mgat2	3R:30015512-30022221	Control	HA	OK	16.0046	13.2834	-0.268861	-1.23683	0.03225	0.199009	no
gene:FBgn0046874	gene:FBgn0046874	Pif1B	3R:8774285-8801176	Control	HA	OK	43.2647	54.1032	0.322522	1.23941	0.03225	0.199009	no
gene:FBgn0086558	gene:FBgn0086558	Ubi-p5E	X:6276875-6279647	Control	HA	OK	767.965	631.07	-0.28324	-1.23434	0.0323	0.199207	no
gene:FBgn0003598	gene:FBgn0003598	Su(var)3-7	3R:13264363-13272011	Control	HA	OK	15.9816	19.5052	0.287442	1.23591	0.03245	0.19923	no
gene:FBgn0011260	gene:FBgn0011260	Sema2a	2R:16500177-16533459	Control	HA	OK	20.4559	24.3687	0.25251	1.23434	0.03245	0.19923	no
gene:FBgn0025519	gene:FBgn0025519	fidipidine	2R:16262283-16264619	Control	HA	OK	9.77053	12.0031	0.296894	1.25022	0.03245	0.19923	no
gene:FBgn0025626	gene:FBgn0025626	CG4281	X:2062312-2065142	Control	HA	OK	13.9127	16.684	0.262062	1.2416	0.0325	0.19923	no
gene:FBgn0026573	gene:FBgn0026573	ADD1	2R:11970685-11979018	Control	HA	OK	10.4031	12.4489	0.259008	1.23709	0.03245	0.19923	no
gene:FBgn0031377	gene:FBgn0031377	CG15356	2L:1975462-1980755	Control	HA	OK	6.20837	7.48928	0.270612	1.25046	0.03235	0.19923	no
gene:FBgn0033806	gene:FBgn0033806	FLASH	2R:13206744-13212237	Control	HA	OK	4.81129	6.05543	0.331807	1.26169	0.0324	0.19923	no
gene:FBgn0037999	gene:FBgn0037999	CG4860	3R:12219880-12221630	Control	HA	OK	14.4079	11.5007	-0.325144	-1.21946	0.0324	0.19923	no
gene:FBgn0038827	gene:FBgn0038827	Fancd2	3R:20810803-20816190	Control	HA	OK	2.20314	2.79295	0.342229	1.23486	0.03235	0.19923	no
gene:FBgn0085192	gene:FBgn0085192	CG34163	2L:11988269-11989882	Control	HA	OK	95.1742	73.5549	-0.371748	-1.24671	0.0325	0.19923	no
gene:FBgn0262601	gene:FBgn0262601	SmB	2L:10425482-10426627	Control	HA	OK	174.883	147.578	-0.244914	-1.22722	0.0325	0.19923	no
gene:FBgn0023479	gene:FBgn0023479	teq	3L:9074642-9092131	Control	HA	OK	5.77448	4.61539	-0.323238	-1.24486	0.03255	0.199317	no
gene:FBgn0053843	gene:FBgn0053843	His1:CG33843	2L:21501632-21502655	Control	HA	OK	5.42038	7.59857	0.487334	1.27252	0.03255	0.199317	no
gene:FBgn0032646	gene:FBgn0032646	mEFTs	2L:17499267-17501106	Control	HA	OK	79.6921	67.4065	-0.24155	-1.21154	0.0326	0.199405	no
gene:FBgn0284244	gene:FBgn0284244	l(2)k05911	2L:13251508-13257426	Control	HA	OK	1.1361	0.779974	-0.54259	-1.24796	0.0326	0.199405	no
gene:FBgn0011606	gene:FBgn0011606	Klp3A	X:2599157-2604052	Control	HA	OK	10.822	12.9753	0.261799	1.22452	0.03265	0.199601	no
gene:FBgn0038087	gene:FBgn0038087	beat-Va	3R:12840559-12848419	Control	HA	OK	0.718183	0.467653	-0.618912	-1.26318	0.0327	0.199798	no
gene:FBgn0027090	gene:FBgn0027090	GlnRS	3R:25262740-25265721	Control	HA	OK	37.0018	46.0747	0.31638	1.2276	0.03275	0.199884	no
gene:FBgn0053120	gene:FBgn0053120	CG33120	2L:18841399-18844579	Control	HA	OK	8.61667	7.09211	-0.280916	-1.22795	0.03275	0.199884	no
gene:FBgn0041702	gene:FBgn0041702	CG15107	2R:18971308-18972537	Control	HA	OK	13.2897	16.3622	0.300054	1.23399	0.0328	0.20008	no
gene:FBgn0024987	gene:FBgn0024987	ssx	X:1370579-1375257	Control	HA	OK	11.6086	13.8969	0.25957	1.26279	0.03285	0.200166	no
gene:FBgn0040383	gene:FBgn0040383	CG5254	X:686833-758719	Control	HA	OK	47.7697	37.0232	-0.367666	-1.25627	0.03285	0.200166	no
gene:FBgn0000964	gene:FBgn0000964	tj	2L:19464266-19467758	Control	HA	OK	15.5907	18.5402	0.249974	1.22106	0.03295	0.200338	no
gene:FBgn0034784	gene:FBgn0034784	CG9826	2R:22840738-22842977	Control	HA	OK	2.559	1.80241	-0.505654	-1.27679	0.0329	0.200338	no
gene:FBgn0038700	gene:FBgn0038700	CG3734	3R:19368994-19403153	Control	HA	OK	26.7756	18.2474	-0.553228	-1.23009	0.03295	0.200338	no
gene:FBgn0259171	gene:FBgn0259171	Pde9	X:12785562-12897327	Control	HA	OK	1.12641	0.686512	-0.71437	-1.24304	0.03295	0.200338	no
gene:FBgn0020412	gene:FBgn0020412	JIL-1	3L:11078751-11093193	Control	HA	OK	7.17822	8.66411	0.271425	1.24866	0.03305	0.200728	no
gene:FBgn0030757	gene:FBgn0030757	CG9902	X:16542123-16547520	Control	HA	OK	1.19301	1.61814	0.439734	1.24655	0.03305	0.200728	no
gene:FBgn0028471	gene:FBgn0028471	Nab2	3R:24314659-24318419	Control	HA	OK	17.7864	21.1327	0.248704	1.2184	0.0331	0.200922	no
gene:FBgn0032228	gene:FBgn0032228	CG5367	2L:10354742-10356597	Control	HA	OK	11.5101	9.31544	-0.305204	-1.25342	0.03315	0.201007	no
gene:FBgn0037008	gene:FBgn0037008	mTerf3	3L:20519589-20520772	Control	HA	OK	16.829	20.7673	0.303364	1.23797	0.03315	0.201007	no
gene:FBgn0054054	gene:FBgn0054054	CG34054	2R:11409809-11410438	Control	HA	OK	5.4085	3.84777	-0.491207	-1.2253	0.0332	0.201201	no
gene:FBgn0031505	gene:FBgn0031505	ND-B14.5B	2L:3144952-3145848	Control	HA	OK	654.379	540.236	-0.276538	-1.22672	0.0333	0.201588	no
gene:FBgn0035032	gene:FBgn0035032	ATPsynF	2R:24597994-24599821	Control	HA	OK	3366.07	2798.52	-0.266401	-1.25338	0.0333	0.201588	no
gene:FBgn0034657	gene:FBgn0034657	LBR	2R:21720494-21724055	Control	HA	OK	5.36958	6.65289	0.309173	1.22692	0.03335	0.201672	no
gene:FBgn0261380	gene:FBgn0261380	mRpL37	3R:10782562-10784092	Control	HA	OK	30.5097	36.5681	0.261315	1.22365	0.03335	0.201672	no
gene:FBgn0022029	gene:FBgn0022029	l(2)k01209	2R:17420406-17427511	Control	HA	OK	23.1423	28.3096	0.290759	1.22151	0.0334	0.201865	no
gene:FBgn0003415	gene:FBgn0003415	skd	3L:20991672-21027434	Control	HA	OK	6.9026	8.16908	0.243034	1.21336	0.03345	0.201948	no
gene:FBgn0035623	gene:FBgn0035623	mthl2	3L:5604789-5608300	Control	HA	OK	2.74825	1.73897	-0.66028	-1.24432	0.03345	0.201948	no
gene:FBgn0051729	gene:FBgn0051729	CG31729	2L:13289996-13301668	Control	HA	OK	32.5116	27.4073	-0.246397	-1.22441	0.0335	0.202141	no
gene:FBgn0039611	gene:FBgn0039611	CG14528	3R:28870605-28887709	Control	HA	OK	4.68285	2.75214	-0.766834	-1.26442	0.03355	0.202333	no
gene:FBgn0022097	gene:FBgn0022097	Vha36-1	2R:15541434-15542498	Control	HA	OK	434.186	364.208	-0.25355	-1.22792	0.03365	0.202608	no
gene:FBgn0030085	gene:FBgn0030085	CG6999	X:9088366-9089314	Control	HA	OK	4.97897	3.26601	-0.60832	-1.2521	0.03365	0.202608	no
gene:FBgn0034229	gene:FBgn0034229	CG4847	2R:17511512-17513855	Control	HA	OK	75.7812	63.9038	-0.245938	-1.23953	0.03365	0.202608	no
gene:FBgn0004655	gene:FBgn0004655	wapl	X:2149935-2158983	Control	HA	OK	10.0624	12.0053	0.254696	1.22169	0.0337	0.2028	no
gene:FBgn0037874	gene:FBgn0037874	Tctp	3R:11210246-11211898	Control	HA	OK	1831.85	1493.4	-0.294694	-1.22852	0.03375	0.202991	no
gene:FBgn0004880	gene:FBgn0004880	scrt	3L:3983895-3994003	Control	HA	OK	0.889256	0.689776	-0.366472	-1.25028	0.03385	0.203373	no
gene:FBgn0013732	gene:FBgn0013732	sced	2R:6657325-6660624	Control	HA	OK	10.3071	12.3788	0.264235	1.23295	0.03385	0.203373	no
gene:FBgn0033926	gene:FBgn0033926	Arc1	2R:14357926-14360297	Control	HA	OK	24.3271	28.9258	0.249794	1.21832	0.0339	0.203564	no
gene:FBgn0015282	gene:FBgn0015282	Rpt2	3R:23929242-23931558	Control	HA	OK	139.391	166.495	0.256341	1.21555	0.03395	0.203645	no
gene:FBgn0039004	gene:FBgn0039004	Nup133	3R:22690606-22694772	Control	HA	OK	10.4904	12.5508	0.258703	1.23177	0.03395	0.203645	no
gene:FBgn0039562	gene:FBgn0039562	Gp93	3R:27948710-27954112	Control	HA	OK	99.7713	120.149	0.268125	1.22198	0.034	0.203836	no
gene:FBgn0040732	gene:FBgn0040732	CG16926	2R:19497751-19501418	Control	HA	OK	218.082	183.717	-0.247388	-1.22986	0.03405	0.204026	no
gene:FBgn0003429	gene:FBgn0003429	slo	3R:24662490-24711595	Control	HA	OK	5.66429	4.70854	-0.266617	-1.20608	0.0341	0.204106	no
gene:FBgn0031563	gene:FBgn0031563	CG10031	2L:3698450-3699092	Control	HA	OK	58.4352	47.9094	-0.286529	-1.23542	0.0341	0.204106	no
gene:FBgn0027109	gene:FBgn0027109	NPF	3R:16609219-16611325	Control	HA	OK	16.3237	11.8409	-0.463187	-1.22865	0.03415	0.204187	no
gene:FBgn0031238	gene:FBgn0031238	CG3645	2L:252588-271744	Control	HA	OK	9.89532	12.476	0.334342	1.21399	0.03415	0.204187	no
gene:FBgn0028518	gene:FBgn0028518	CG18480	2L:15630001-15634987	Control	HA	OK	5.41972	4.23154	-0.357037	-1.22616	0.0342	0.204267	no
gene:FBgn0037439	gene:FBgn0037439	CG10286	3R:6368964-6377348	Control	HA	OK	18.3259	23.4267	0.354268	1.21559	0.0342	0.204267	no
gene:FBgn0031473	gene:FBgn0031473	CG3104	2L:2847631-2855778	Control	HA	OK	7.05245	5.62817	-0.325459	-1.22638	0.0343	0.204754	no
gene:FBgn0036193	gene:FBgn0036193	CG14135	3L:11691570-11692757	Control	HA	OK	23.8596	19.4658	-0.293631	-1.2227	0.03435	0.204943	no
gene:FBgn0034073	gene:FBgn0034073	CG8414	2R:16098947-16102608	Control	HA	OK	14.6985	18.1372	0.303281	1.23103	0.03445	0.205321	no
gene:FBgn0261681	gene:FBgn0261681	CG42728	3L:15527619-15528196	Control	HA	OK	0.691721	0.185837	-1.89615	-1.43597	0.03445	0.205321	no
gene:FBgn0020762	gene:FBgn0020762	Atet	2L:4333912-4345776	Control	HA	OK	12.2255	10.2253	-0.257744	-1.22136	0.03465	0.205634	no
gene:FBgn0029002	gene:FBgn0029002	miple2	3L:271199-275018	Control	HA	OK	17.2161	21.014	0.287597	1.20663	0.03455	0.205634	no
gene:FBgn0030345	gene:FBgn0030345	CG1847	X:11869169-11871168	Control	HA	OK	18.8748	15.6929	-0.266352	-1.21635	0.0346	0.205634	no
gene:FBgn0031494	gene:FBgn0031494	CG17219	2L:3029252-3035348	Control	HA	OK	7.08406	10.2631	0.534815	1.2474	0.0346	0.205634	no
gene:FBgn0031987	gene:FBgn0031987	CG12375	2L:8124328-8126890	Control	HA	OK	50.7756	42.6861	-0.250369	-1.22337	0.03465	0.205634	no
gene:FBgn0050069	gene:FBgn0050069	CG30069	2R:14185203-14198368	Control	HA	OK	3.49438	4.16966	0.254897	1.23268	0.0346	0.205634	no
gene:FBgn0053093	gene:FBgn0053093	CG33093	3R:22530693-22531922	Control	HA	OK	3.90139	2.7151	-0.522981	-1.23931	0.03465	0.205634	no
gene:FBgn0285937	gene:FBgn0285937	Rab1	3R:21266028-21269060	Control	HA	OK	145.923	117.149	-0.316863	-1.24159	0.03465	0.205634	no
gene:FBgn0030805	gene:FBgn0030805	wus	X:16938243-16940873	Control	HA	OK	19.5513	16.3206	-0.26057	-1.22343	0.0347	0.205822	no
gene:FBgn0004913	gene:FBgn0004913	Gnf1	3R:4906621-4910081	Control	HA	OK	32.6068	38.5533	0.241681	1.21039	0.03475	0.206009	no
gene:FBgn0037782	gene:FBgn0037782	Npc2d	3R:10055355-10056083	Control	HA	OK	42.2108	34.3091	-0.299023	-1.23144	0.03485	0.206382	no
gene:FBgn0051852	gene:FBgn0051852	Tap42	2L:13367616-13369021	Control	HA	OK	24.8474	29.8216	0.263263	1.21262	0.03485	0.206382	no
gene:FBgn0032194	gene:FBgn0032194	CG4901	2L:10211142-10213721	Control	HA	OK	17.5829	20.9776	0.254678	1.21178	0.0349	0.206569	no
gene:FBgn0033757	gene:FBgn0033757	muskelin	2R:12628696-12632378	Control	HA	OK	31.0494	36.6561	0.239488	1.20131	0.03505	0.207347	no
gene:FBgn0000289	gene:FBgn0000289	cg	2R:14173692-14182838	Control	HA	OK	21.9449	26.1625	0.253613	1.20351	0.0351	0.207423	no
gene:FBgn0026255	gene:FBgn0026255	clumsy	2L:21206492-21211818	Control	HA	OK	2.28491	2.89259	0.340223	1.20565	0.0351	0.207423	no
gene:FBgn0031092	gene:FBgn0031092	CG9577	X:20166672-20169981	Control	HA	OK	50.4235	63.3583	0.329437	1.21822	0.03515	0.207608	no
gene:FBgn0259219	gene:FBgn0259219	CG42319	2R:13260100-13266336	Control	HA	OK	143.122	119.514	-0.260056	-1.22102	0.0352	0.207684	no
gene:FBgn0265086	gene:FBgn0265086	CR44197	2L:13089802-13090559	Control	HA	OK	1.77765	0.986908	-0.848983	-1.26709	0.0352	0.207684	no
gene:FBgn0002778	gene:FBgn0002778	mnd	3L:14985099-14991667	Control	HA	OK	24.6021	29.1869	0.24654	1.21901	0.03535	0.208348	no
gene:FBgn0267508	gene:FBgn0267508	28SrRNA-Psi:CR45848	rDNA:4491-5312	Control	HA	OK	78.4098	65.9738	-0.249142	-1.24989	0.03535	0.208348	no
gene:FBgn0005596	gene:FBgn0005596	yem	3R:29116390-29122879	Control	HA	OK	13.7698	17.0133	0.305159	1.2102	0.0354	0.208533	no
gene:FBgn0000139	gene:FBgn0000139	ash2	3R:24650124-24654820	Control	HA	OK	19.7532	23.9839	0.279983	1.20757	0.03545	0.208607	no
gene:FBgn0267511	gene:FBgn0267511	28SrRNA-Psi:CR45851	rDNA:35940-38740	Control	HA	OK	162.304	136.268	-0.252258	-1.21861	0.03545	0.208607	no
gene:FBgn0000566	gene:FBgn0000566	Eip55E	2R:18627917-18629395	Control	HA	OK	80.4017	95.146	0.242917	1.2346	0.0355	0.208682	no
gene:FBgn0015794	gene:FBgn0015794	Rab18	X:5670826-5671812	Control	HA	OK	74.6687	62.6959	-0.252131	-1.20521	0.0355	0.208682	no
gene:FBgn0015024	gene:FBgn0015024	CkIalpha	X:12653625-12657834	Control	HA	OK	147.823	122.563	-0.270341	-1.26353	0.03555	0.208756	no
gene:FBgn0038100	gene:FBgn0038100	Paip2	3R:12980791-12985488	Control	HA	OK	63.573	53.5779	-0.246775	-1.27001	0.03555	0.208756	no
gene:FBgn0030082	gene:FBgn0030082	HP1b	X:9081062-9082746	Control	HA	OK	43.7825	36.1142	-0.277788	-1.23444	0.03565	0.209233	no
gene:FBgn0053886	gene:FBgn0053886	His2B:CG33886	2L:21492699-21493294	Control	HA	OK	4.84486	3.00457	-0.689295	-1.24103	0.0357	0.209416	no
gene:FBgn0025388	gene:FBgn0025388	CG12179	X:4631051-4636004	Control	HA	OK	2.84637	3.56315	0.32403	1.21533	0.0358	0.209893	no
gene:FBgn0010409	gene:FBgn0010409	RpL18A	2R:17546405-17547462	Control	HA	OK	2776.68	3343.9	0.268172	1.21514	0.0359	0.210258	no
gene:FBgn0035270	gene:FBgn0035270	CG13933	3L:1771808-1775147	Control	HA	OK	11.5108	13.7218	0.253487	1.21364	0.0359	0.210258	no
gene:FBgn0010830	gene:FBgn0010830	l(3)04053	3L:22738601-22741388	Control	HA	OK	10.466	12.7505	0.284852	1.21868	0.03595	0.21044	no
gene:FBgn0265316	gene:FBgn0265316	CR44289	3R:27535830-27537903	Control	HA	OK	1.14938	0.784186	-0.551593	-1.21525	0.036	0.210623	no
gene:FBgn0038665	gene:FBgn0038665	euc	3R:18978272-18978809	Control	HA	OK	34.9765	26.3728	-0.407336	-1.22177	0.03605	0.210694	no
gene:FBgn0085819	gene:FBgn0085819	28SrRNA-Psi:CR41609	X:23261771-23262666	Control	HA	OK	154.771	130.873	-0.241963	-1.20462	0.03605	0.210694	no
gene:FBgn0035753	gene:FBgn0035753	RpL18	3L:7238541-7241351	Control	HA	OK	2684.36	3230.92	0.267368	1.22342	0.0361	0.210876	no
gene:FBgn0037727	gene:FBgn0037727	CG8358	3R:9675522-9677778	Control	HA	OK	1.97926	1.40916	-0.490121	-1.21676	0.03615	0.211058	no
gene:FBgn0034328	gene:FBgn0034328	IM23	2R:18382703-18383235	Control	HA	OK	46.5434	37.5426	-0.310049	-1.21018	0.0362	0.211129	no
gene:FBgn0069354	gene:FBgn0069354	Porin2	2L:10845787-10847044	Control	HA	OK	2.59712	1.7313	-0.585057	-1.19725	0.0362	0.211129	no
gene:FBgn0031263	gene:FBgn0031263	Tspo	2L:553741-560523	Control	HA	OK	250.632	212.001	-0.2415	-1.20424	0.03625	0.21131	no
gene:FBgn0085261	gene:FBgn0085261	CG34232	2R:12164908-12165812	Control	HA	OK	33.8998	27.1813	-0.31866	-1.20993	0.0363	0.211491	no
gene:FBgn0050090	gene:FBgn0050090	CG30090	2R:15689825-15691014	Control	HA	OK	6.97159	5.09665	-0.451937	-1.24207	0.0364	0.211853	no
gene:FBgn0267012	gene:FBgn0267012	CR45456	2L:9325844-9326721	Control	HA	OK	0.800982	0.419311	-0.933749	-1.23796	0.0364	0.211853	no
gene:FBgn0028940	gene:FBgn0028940	Cyp28a5	2L:13977301-13979569	Control	HA	OK	20.6157	17.2209	-0.259577	-1.2154	0.03645	0.212033	no
gene:FBgn0038984	gene:FBgn0038984	AdipoR	3R:22543692-22547846	Control	HA	OK	103.172	86.6765	-0.251335	-1.21929	0.0365	0.212213	no
gene:FBgn0003390	gene:FBgn0003390	shf	X:6771224-6779659	Control	HA	OK	12.5887	8.74479	-0.525638	-1.24801	0.0366	0.212573	no
gene:FBgn0046875	gene:FBgn0046875	Obp83g	3R:6111670-6112302	Control	HA	OK	7.69244	11.3874	0.565927	1.20318	0.0366	0.212573	no
gene:FBgn0033927	gene:FBgn0033927	CR10102	2R:14360432-14361780	Control	HA	OK	17.3961	21.3352	0.294468	1.22164	0.03665	0.212753	no
gene:FBgn0031493	gene:FBgn0031493	Sf3b2	2L:3023225-3029168	Control	HA	OK	21.0018	25.9051	0.302724	1.20795	0.0367	0.212932	no
gene:FBgn0264489	gene:FBgn0264489	CG43897	3L:9813846-9834345	Control	HA	OK	455.346	375.109	-0.279654	-1.23015	0.03675	0.213112	no
gene:FBgn0030969	gene:FBgn0030969	Usp39	X:18858202-18860072	Control	HA	OK	17.2534	20.8336	0.272032	1.20991	0.03685	0.213581	no
gene:FBgn0015872	gene:FBgn0015872	Drip	2R:11411202-11429645	Control	HA	OK	25.3487	21.0867	-0.265574	-1.1941	0.037	0.214339	no
gene:FBgn0015818	gene:FBgn0015818	Spx	X:6255821-6257596	Control	HA	OK	15.3787	18.679	0.280488	1.20436	0.03715	0.214985	no
gene:FBgn0037894	gene:FBgn0037894	Ranbp9	3R:11412521-11416142	Control	HA	OK	26.3964	31.1563	0.239185	1.19564	0.03715	0.214985	no
gene:FBgn0012058	gene:FBgn0012058	Cdc27	3L:7245480-7249340	Control	HA	OK	15.4487	18.3154	0.245566	1.19236	0.0372	0.215162	no
gene:FBgn0037354	gene:FBgn0037354	CG12171	3R:5633626-5635624	Control	HA	OK	66.1471	55.8019	-0.245363	-1.20186	0.03725	0.21534	no
gene:FBgn0029006	gene:FBgn0029006	Smurf	2R:17592790-17604461	Control	HA	OK	7.43207	8.80889	0.245196	1.20455	0.0373	0.215406	no
gene:FBgn0035148	gene:FBgn0035148	CG3402	3L:651541-652881	Control	HA	OK	37.6986	31.5339	-0.25761	-1.22315	0.0373	0.215406	no
gene:FBgn0013953	gene:FBgn0013953	Esp	3R:24841934-24850412	Control	HA	OK	11.795	14.0514	0.252533	1.21155	0.0375	0.216337	no
gene:FBgn0259209	gene:FBgn0259209	Mlp60A	2R:24074601-24078223	Control	HA	OK	934.079	745.016	-0.326272	-1.19602	0.0375	0.216337	no
gene:FBgn0030746	gene:FBgn0030746	CG9981	X:16391697-16405122	Control	HA	OK	1.03813	0.589114	-0.817369	-1.21355	0.03755	0.216402	no
gene:FBgn0087002	gene:FBgn0087002	apolpp	4:1057364-1077273	Control	HA	OK	116.346	94.7533	-0.296171	-1.24664	0.03755	0.216402	no
gene:FBgn0030799	gene:FBgn0030799	CG4872	X:16881346-16884365	Control	HA	OK	10.1159	7.25476	-0.47962	-1.20784	0.0376	0.216578	no
gene:FBgn0010403	gene:FBgn0010403	Obp83b	3R:5976176-5976817	Control	HA	OK	36.6695	28.6636	-0.355363	-1.20214	0.03765	0.216643	no
gene:FBgn0036321	gene:FBgn0036321	CG14120	3L:12885038-12889244	Control	HA	OK	8.93757	7.51011	-0.251048	-1.19563	0.03765	0.216643	no
gene:FBgn0010894	gene:FBgn0010894	sinu	3L:5559469-5561598	Control	HA	OK	9.60891	7.94021	-0.275195	-1.22317	0.0377	0.216819	no
gene:FBgn0040396	gene:FBgn0040396	CG3939	X:3175017-3176223	Control	HA	OK	122.921	103.594	-0.246796	-1.20127	0.03775	0.216994	no
gene:FBgn0015795	gene:FBgn0015795	Rab7	3R:23993007-23995452	Control	HA	OK	237.323	200.225	-0.245234	-1.20945	0.0378	0.21717	no
gene:FBgn0030676	gene:FBgn0030676	CG12379	X:15732177-15733996	Control	HA	OK	13.9906	8.95126	-0.64429	-1.24415	0.0379	0.217633	no
gene:FBgn0032153	gene:FBgn0032153	CG4537	2L:9890884-9893446	Control	HA	OK	44.2849	26.294	-0.752081	-1.24262	0.03795	0.217808	no
gene:FBgn0025682	gene:FBgn0025682	scf	3L:1298671-1300389	Control	HA	OK	34.943	41.4881	0.247694	1.19957	0.038	0.217871	no
gene:FBgn0028953	gene:FBgn0028953	CG14478	2R:17457662-17465795	Control	HA	OK	18.5657	21.9179	0.239472	1.22133	0.038	0.217871	no
gene:FBgn0050373	gene:FBgn0050373	CG30373	2R:8163563-8167769	Control	HA	OK	104.182	76.878	-0.438461	-1.18977	0.03805	0.218045	no
gene:FBgn0017577	gene:FBgn0017577	Mcm5	3R:10788523-10791150	Control	HA	OK	40.5145	47.7711	0.237699	1.18618	0.0381	0.21822	no
gene:FBgn0026439	gene:FBgn0026439	Eaat1	2L:9333566-9341925	Control	HA	OK	35.1949	29.8675	-0.236789	-1.19471	0.0382	0.218518	no
gene:FBgn0035145	gene:FBgn0035145	MED14	3L:593245-604008	Control	HA	OK	5.61845	7.04249	0.325915	1.19959	0.03825	0.218518	no
gene:FBgn0038058	gene:FBgn0038058	CG5608	3R:12462561-12465298	Control	HA	OK	7.03556	8.59076	0.288121	1.15941	0.0382	0.218518	no
gene:FBgn0053879	gene:FBgn0053879	His4:CG33879	2L:21509421-21509834	Control	HA	OK	1.88689	3.56908	0.919543	1.21293	0.03825	0.218518	no
gene:FBgn0283682	gene:FBgn0283682	Ge-1	2L:11095149-11100888	Control	HA	OK	12.894	15.3161	0.248358	1.21169	0.03825	0.218518	no
gene:FBgn0025777	gene:FBgn0025777	homer	2L:6719393-6723359	Control	HA	OK	34.103	28.7718	-0.245245	-1.23397	0.0385	0.219834	no
gene:FBgn0050345	gene:FBgn0050345	CG30345	2R:9148688-9151892	Control	HA	OK	8.31507	6.81152	-0.287752	-1.18031	0.03855	0.220007	no
gene:FBgn0243511	gene:FBgn0243511	psidin	3R:20021703-20026482	Control	HA	OK	12.9531	15.4135	0.250895	1.2017	0.0387	0.22075	no
gene:FBgn0037978	gene:FBgn0037978	KLHL18	3R:12007475-12010434	Control	HA	OK	10.7347	8.78547	-0.289095	-1.18009	0.03875	0.220922	no
gene:FBgn0005633	gene:FBgn0005633	fln	3L:19989550-19991220	Control	HA	OK	903.614	741.236	-0.285773	-1.20628	0.0388	0.220982	no
gene:FBgn0035838	gene:FBgn0035838	ldbr	3L:8121826-8124531	Control	HA	OK	6.35168	8.36246	0.396788	1.20019	0.0388	0.220982	no
gene:FBgn0036819	gene:FBgn0036819	Dysb	3L:18867770-18869219	Control	HA	OK	12.4815	9.86931	-0.338773	-1.19122	0.0389	0.221438	no
gene:FBgn0040364	gene:FBgn0040364	CG11378	X:1170827-1173797	Control	HA	OK	46.0194	38.5748	-0.254582	-1.20246	0.03895	0.22161	no
gene:FBgn0000527	gene:FBgn0000527	e	3R:21229838-21237177	Control	HA	OK	5.11355	4.07404	-0.327867	-1.19886	0.03905	0.221727	no
gene:FBgn0034365	gene:FBgn0034365	CG5335	2R:18620465-18625044	Control	HA	OK	38.3144	30.5364	-0.327357	-1.18525	0.039	0.221727	no
gene:FBgn0259994	gene:FBgn0259994	CG42492	X:5625675-5648487	Control	HA	OK	7.22057	5.97545	-0.273065	-1.2067	0.03905	0.221727	no
gene:FBgn0265081	gene:FBgn0265081	CR44192	3R:10049198-10054348	Control	HA	OK	6.2757	3.12281	-1.00693	-1.26629	0.03905	0.221727	no
gene:FBgn0011336	gene:FBgn0011336	Stt3B	3R:25065790-25069637	Control	HA	OK	33.2256	39.3042	0.24239	1.18113	0.0392	0.22224	no
gene:FBgn0031540	gene:FBgn0031540	Pif1	2L:3467341-3470004	Control	HA	OK	11.7164	14.0584	0.262898	1.18763	0.0392	0.22224	no
gene:FBgn0034853	gene:FBgn0034853	Ice1	2R:23366865-23377045	Control	HA	OK	6.47265	8.71572	0.429264	1.19434	0.0392	0.22224	no
gene:FBgn0053144	gene:FBgn0053144	CG33144	2R:10740053-10798709	Control	HA	OK	10.0537	8.44156	-0.252151	-1.17893	0.03925	0.22241	no
gene:FBgn0266171	gene:FBgn0266171	pre-mod(mdg4)-AB	3R:21350845-21377401	Control	HA	OK	0.709694	0	#NAME?	#NAME?	0.03935	0.222864	no
gene:FBgn0040900	gene:FBgn0040900	CG17777	X:2186854-2187741	Control	HA	OK	25.7082	19.5762	-0.393123	-1.21445	0.0394	0.223034	no
gene:FBgn0034529	gene:FBgn0034529	FAM21	2R:20623546-20633506	Control	HA	OK	5.38561	6.55042	0.282479	1.19239	0.03945	0.223203	no
gene:FBgn0040534	gene:FBgn0040534	Sf3b5	3R:9014971-9015341	Control	HA	OK	238.241	196.023	-0.2814	-1.25608	0.0395	0.223373	no
gene:FBgn0086707	gene:FBgn0086707	ncm	2L:18444506-18448957	Control	HA	OK	16.4501	19.4303	0.240209	1.19146	0.03955	0.223543	no
gene:FBgn0265101	gene:FBgn0265101	Sgt1	3R:8304189-8305274	Control	HA	OK	101.119	85.9869	-0.233864	-1.17995	0.0396	0.223712	no
gene:FBgn0031285	gene:FBgn0031285	CG3662	2L:821288-825861	Control	HA	OK	254.898	214.293	-0.250332	-1.1871	0.03975	0.224332	no
gene:FBgn0053853	gene:FBgn0053853	His2A:CG33853	2L:21518654-21519147	Control	HA	OK	63.4797	51.5009	-0.301698	-1.20091	0.03975	0.224332	no
gene:FBgn0031538	gene:FBgn0031538	CG3246	2L:3457301-3461952	Control	HA	OK	43.9951	35.2105	-0.321338	-1.18506	0.0398	0.224388	no
gene:FBgn0038675	gene:FBgn0038675	CG6013	3R:19031502-19032409	Control	HA	OK	63.2471	52.1182	-0.279213	-1.21484	0.0398	0.224388	no
gene:FBgn0036101	gene:FBgn0036101	NijA	3L:10694359-10696877	Control	HA	OK	12.9974	10.3825	-0.324072	-1.18473	0.03985	0.224556	no
gene:FBgn0261461	gene:FBgn0261461	RhoGAP18B	X:19136106-19167082	Control	HA	OK	8.52374	6.87764	-0.309573	-1.18879	0.0399	0.224611	no
gene:FBgn0284080	gene:FBgn0284080	CG46302	2R:854813-855571	Control	HA	OK	79.256	66.6957	-0.248927	-1.2173	0.0399	0.224611	no
gene:FBgn0039633	gene:FBgn0039633	CG11873	3R:29063039-29108948	Control	HA	OK	3.94035	4.6482	0.238348	1.18128	0.03995	0.224779	no
gene:FBgn0013679	gene:FBgn0013679	mt:ND1	mitochondrion_genome:11720-12659	Control	HA	OK	836.739	693.893	-0.270064	-1.32217	0.0402	0.225504	no
gene:FBgn0015904	gene:FBgn0015904	ara	3L:12580671-12596018	Control	HA	OK	1.38575	0.985584	-0.491616	-1.18739	0.0402	0.225504	no
gene:FBgn0038299	gene:FBgn0038299	Spn88Eb	3R:15206702-15208762	Control	HA	OK	8.87107	7.01924	-0.337794	-1.18121	0.0402	0.225504	no
gene:FBgn0052133	gene:FBgn0052133	Ptip	3L:14020314-14029121	Control	HA	OK	3.63839	4.33417	0.252457	1.16813	0.0402	0.225504	no
gene:FBgn0260972	gene:FBgn0260972	alc	2R:9132479-9137933	Control	HA	OK	153.725	121.777	-0.336117	-1.18442	0.04015	0.225504	no
gene:FBgn0262126	gene:FBgn0262126	Sec24CD	2L:2231105-2237022	Control	HA	OK	12.1916	14.397	0.239885	1.17224	0.04015	0.225504	no
gene:FBgn0264707	gene:FBgn0264707	RhoGEF3	3L:277436-305292	Control	HA	OK	7.00526	8.53517	0.284982	1.18344	0.04025	0.225671	no
gene:FBgn0005411	gene:FBgn0005411	U2af50	X:16356695-16359039	Control	HA	OK	119.881	101.898	-0.234481	-1.17396	0.04035	0.225891	no
gene:FBgn0036714	gene:FBgn0036714	CG7692	3L:17351821-17358056	Control	HA	OK	3.9507	4.78324	0.275878	1.16774	0.04035	0.225891	no
gene:FBgn0261524	gene:FBgn0261524	lic	X:13091144-13093986	Control	HA	OK	41.7504	49.1567	0.235601	1.16663	0.04035	0.225891	no
gene:FBgn0039860	gene:FBgn0039860	CG1792	3R:31616302-31617837	Control	HA	OK	8.42851	10.5947	0.329997	1.16037	0.0405	0.226504	no
gene:FBgn0260441	gene:FBgn0260441	RpS12	3L:13023351-13024762	Control	HA	OK	2431.8	2929.35	0.268559	1.2385	0.0405	0.226504	no
gene:FBgn0016641	gene:FBgn0016641	PTP-ER	2R:21619320-21624446	Control	HA	OK	6.26775	7.45484	0.250229	1.17816	0.04055	0.226556	no
gene:FBgn0025382	gene:FBgn0025382	Rab27	X:1473883-1476974	Control	HA	OK	8.90939	6.84237	-0.380832	-1.24002	0.04055	0.226556	no
[truncated: 15,651 more rows]

## Sheet: Table S2
Table S2: Genes differentially expressed in response to HA in D. simulans
test_id	gene_id	gene	locus	sample_1	sample_2	status	value_1	value_2	log2(fold_change)	test_stat	p_value	q_value	significant	mel ortholog	direction	Sim Flybase Gene ID	Mel Flybase Gene ID	KEGG Gene ID
gene:FBgn0193143	gene:FBgn0193143	Dsim\GD21720	2L:19477764-19478677	Control	HA	OK	148.497	81.3991	-0.867352	-3.47483	5e-05	0.00203673	yes	AANATL3	down	FBgn0193143	FBgn0032839	dme:Dmel_CG10659
gene:FBgn0195730	gene:FBgn0195730	Dsim\GD24389	4:155995-164893	Control	HA	OK	19.0334	11.5743	-0.717611	-2.77071	5e-05	0.00203673	yes	ABCD	down	FBgn0195730	FBgn0039890	dme:Dmel_CG2316
gene:FBgn0183336	gene:FBgn0183336	Dsim\GD11595	2R:17786653-17789615	Control	HA	OK	21.1341	15.1	-0.48502	-1.7881	0.0034	0.0468028	yes	Acox57D-d	down	FBgn0183336	FBgn0034629	dme:Dmel_CG9709
gene:FBgn0184866	gene:FBgn0184866	Dsim\GD13144	3L:6055804-6056518	Control	HA	OK	1241.4	774.142	-0.681295	-2.35132	0.00285	0.0415833	yes	Acp65Aa	down	FBgn0184866	FBgn0020765	dme:Dmel_CG10297
gene:FBgn0185977	gene:FBgn0185977	Dsim\GD14292	3L:10904645-10907239	Control	HA	OK	3.61381	2.39733	-0.592088	-1.74696	0.0026	0.038961	yes	Adck5	down	FBgn0185977	FBgn0036142	dme:Dmel_CG7616
gene:FBgn0185940	gene:FBgn0185940	Dsim\GD14255	3L:10403390-10404457	Control	HA	OK	12.5361	6.97389	-0.846049	-2.99887	5e-05	0.00203673	yes	Adi1	down	FBgn0185940	FBgn0052068	dme:Dmel_CG32068
gene:FBgn0270023	gene:FBgn0270023	Dsim\GD28733	2R:464679-481281	Control	HA	OK	1.68797	0.800018	-1.07718	-3.396	5e-05	0.00203673	yes	AGO3	down	FBgn0270023	FBgn0250816	dme:Dmel_CG40300
gene:FBgn0270325	gene:FBgn0270325	Dsim\GD29035	3L:22714743-22977283	Control	HA	OK	5.48445	2.84171	-0.94859	-1.95292	0.00155	0.0274273	yes	AGO3	down	FBgn0270325	FBgn0250816	dme:Dmel_CG40300
gene:FBgn0197110	gene:FBgn0197110	Dsim\GD25830	2R:9162346-9166012	Control	HA	OK	27.8949	13.9577	-0.998938	-3.34798	5e-05	0.00203673	yes	Ak6	down	FBgn0197110	FBgn0033754	dme:Dmel_CG8816
gene:FBgn0184516	gene:FBgn0184516	Dsim\GD12789	3L:11320718-11325644	Control	HA	OK	159.019	113.299	-0.489067	-2.13183	0.0017	0.0291512	yes	Akr1B	down	FBgn0184516	FBgn0086254	dme:Dmel_CG6084
gene:FBgn0184578	gene:FBgn0184578	Dsim\GD12853	JPYS01004463:7660-10720	Control	HA	OK	83.1707	51.8201	-0.682561	-2.8147	5e-05	0.00203673	yes	Alg-2	down	FBgn0184578	FBgn0086378	dme:Dmel_CG40410
gene:FBgn0196000	gene:FBgn0196000	Dsim\GD24673	X:14909349-14910626	Control	HA	OK	5.21931	2.53408	-1.0424	-3.52123	5e-05	0.00203673	yes	AlkB	down	FBgn0196000	FBgn0065035	dme:Dmel_CG33250
gene:FBgn0196449	gene:FBgn0196449	Dsim\GD25137	2R:18589624-18591937	Control	HA	OK	3.19761	1.48407	-1.10743	-2.28356	0.00025	0.00696927	yes	Alp8	down	FBgn0196449	FBgn0034712	dme:Dmel_CG3264
gene:FBgn0183783	gene:FBgn0183783	Dsim\GD12044	3L:22685794-22699709	Control	HA	OK	13.1744	8.63645	-0.609225	-2.3425	5e-05	0.00203673	yes	alpha-Cat	down	FBgn0183783	FBgn0010215	dme:Dmel_CG17947
gene:FBgn0268424	gene:FBgn0268424	Dsim\GD27134	2L:21805105-21819023	Control	HA	OK	13.4778	8.70165	-0.631223	-2.42924	5e-05	0.00203673	yes		down	FBgn0268424	FBgn0010215
gene:FBgn0191424	gene:FBgn0191424	Dsim\GD19941	3R:3286262-3290108	Control	HA	OK	14.1677	9.89372	-0.518016	-1.82846	0.00155	0.0274273	yes	alpha-Est2	down	FBgn0191424	FBgn0015570	dme:Dmel_CG2505
gene:FBgn0269155	gene:FBgn0269155	Dsim\GD27865	4:89093-103274	Control	HA	OK	12.5452	8.47863	-0.565227	-2.1445	0.00025	0.00696927	yes	Ank	down	FBgn0269155	FBgn0011747	dme:Dmel_CG1651
gene:FBgn0195738	gene:FBgn0195738	Dsim\GD24398	4:105884-116348	Control	HA	OK	12.7405	8.13306	-0.647553	-2.52742	5e-05	0.00203673	yes	anne	down	FBgn0195738	FBgn0052000	dme:Dmel_CG32000
gene:FBgn0270781	gene:FBgn0270781	Dsim\GD29491	2R:10958895-10959804	Control	HA	OK	9.08328	5.59181	-0.699897	-2.10447	0.00145	0.0260739	yes	Arc1	down	FBgn0270781	FBgn0033926	dme:Dmel_CG12505
gene:FBgn0191964	gene:FBgn0191964	Dsim\GD20493	4:928260-929230	Control	HA	OK	74.4365	38.1528	-0.964219	-3.67291	5e-05	0.00203673	yes	Arf102F	down	FBgn0191964	FBgn0013749	dme:Dmel_CG11027
gene:FBgn0182864	gene:FBgn0182864	Dsim\GD11108	2R:11879986-11882474	Control	HA	OK	13.4402	7.72812	-0.798369	-3.15926	5e-05	0.00203673	yes	Arf51F	down	FBgn0182864	FBgn0013750	dme:Dmel_CG8156
gene:FBgn0183788	gene:FBgn0183788	Dsim\GD12049	3L:22246573-22251610	Control	HA	OK	417.472	267.371	-0.642836	-3.07381	0.00035	0.00897943	yes	Arf79F	down	FBgn0183788	FBgn0010348	dme:Dmel_CG8385
gene:FBgn0195731	gene:FBgn0195731	Dsim\GD24390	4:146210-151245	Control	HA	OK	76.7986	42.9745	-0.837599	-3.21459	5e-05	0.00203673	yes	Arl4	down	FBgn0195731	FBgn0039889	dme:Dmel_CG2219
gene:FBgn0190038	gene:FBgn0190038	Dsim\GD18515	3R:17012549-17015556	Control	HA	OK	6.92788	4.95078	-0.484758	-2.09817	0.0019	0.0316561	yes	Arl8	down	FBgn0190038	FBgn0037551	dme:Dmel_CG7891
gene:FBgn0189141	gene:FBgn0189141	Dsim\GD17591	3L:7916430-7918717	Control	HA	OK	33.5718	23.9912	-0.484745	-1.91048	0.00115	0.0221992	yes	Arp3	down	FBgn0189141	FBgn0262716	dme:Dmel_CG7558
gene:FBgn0193607	gene:FBgn0193607	Dsim\GD22198	2L:10733994-10739207	Control	HA	OK	3.9876	2.33707	-0.770817	-2.12137	0.0003	0.00809189	yes	AstC	down	FBgn0193607	FBgn0032336	dme:Dmel_CG14919
gene:FBgn0189028	gene:FBgn0189028	Dsim\GD17476	2R:2053200-2063257	Control	HA	OK	13.2367	7.29698	-0.859176	-3.46662	5e-05	0.00203673	yes	Atf6	down	FBgn0189028	FBgn0033010	dme:Dmel_CG3136
gene:FBgn0186656	gene:FBgn0186656	Dsim\GD14984	3L:21049830-21051513	Control	HA	OK	70.2553	46.5907	-0.592565	-2.35775	0.00015	0.00464907	yes	Atox1	down	FBgn0186656	FBgn0052446	dme:Dmel_CG32446
gene:FBgn0192611	gene:FBgn0192611	Dsim\GD21160	3R:20375808-20383916	Control	HA	OK	52.5544	36.0873	-0.542321	-2.7743	0.0013	0.0239373	yes	bai	down	FBgn0192611	FBgn0045866	dme:Dmel_CG11785
gene:FBgn0184182	gene:FBgn0184182	Dsim\GD12451	3L:16236905-16250167	Control	HA	OK	19.3977	14.0547	-0.46483	-1.76261	0.0022	0.0348508	yes	Baldspot	down	FBgn0184182	FBgn0260960	dme:Dmel_CG3971
gene:FBgn0184648	gene:FBgn0184648	Dsim\GD12923	3L:9202162-9206056	Control	HA	OK	11.2713	7.00731	-0.685719	-1.99683	0.00115	0.0221992	yes	Bet3	down	FBgn0184648	FBgn0260859	dme:Dmel_CG3911
gene:FBgn0184724	gene:FBgn0184724	Dsim\GD13001	3L:8104915-8106830	Control	HA	OK	110.542	76.478	-0.531482	-2.03074	0.00035	0.00897943	yes	BI-1	down	FBgn0184724	FBgn0035871	dme:Dmel_CG7188
gene:FBgn0190481	gene:FBgn0190481	Dsim\GD18972	3R:10719534-10720913	Control	HA	OK	117.268	79.0055	-0.569783	-2.28437	0.0004	0.010005	yes	BigH1	down	FBgn0190481	FBgn0038252	dme:Dmel_CG3509
gene:FBgn0186450	gene:FBgn0186450	Dsim\GD14777	3L:18383328-18385710	Control	HA	OK	20.1367	9.98864	-1.01146	-2.7548	5e-05	0.00203673	yes	Blos3	down	FBgn0186450	FBgn0085284	dme:Dmel_CG34255
gene:FBgn0189183	gene:FBgn0189183	Dsim\GD17633	3L:10618151-10619555	Control	HA	OK	2.80919	1.6579	-0.760802	-2.62049	5e-05	0.00203673	yes	Blos4	down	FBgn0189183	FBgn0036105	dme:Dmel_CG14149
gene:FBgn0183116	gene:FBgn0183116	Dsim\GD11367	2R:14898994-14899437	Control	HA	OK	33.3696	13.3536	-1.3213	-4.30213	5e-05	0.00203673	yes	BomT2	down	FBgn0183116	FBgn0040735	dme:Dmel_CG16836
gene:FBgn0192418	gene:FBgn0192418	Dsim\GD20962	3R:17902377-17908135	Control	HA	OK	42.9135	31.1071	-0.46419	-1.81047	0.0025	0.0379756	yes	bond	down	FBgn0192418	FBgn0260942	dme:Dmel_CG6921
gene:FBgn0195408	gene:FBgn0195408	Dsim\GD24050	2L:15829105-15831579	Control	HA	OK	0.847837	0.520539	-0.703781	-1.81874	0.00315	0.0443399	yes	c(2)M	down	FBgn0195408	FBgn0028525	dme:Dmel_CG4249
gene:FBgn0195705	gene:FBgn0195705	Dsim\GD24359	4:892727-927421	Control	HA	OK	11.6796	7.05592	-0.727079	-2.69903	5e-05	0.00203673	yes	Cals	down	FBgn0195705	FBgn0039928	dme:Dmel_CG11059
gene:FBgn0196109	gene:FBgn0196109	Dsim\GD24788	JPYS01000010:126-4205	Control	HA	OK	121.395	63.2839	-0.939798	-5.90347	5e-05	0.00203673	yes	CaMKI	down	FBgn0196109	FBgn0016126	dme:Dmel_CG1495
gene:FBgn0187024	gene:FBgn0187024	Dsim\GD15356	2R:4514824-4517114	Control	HA	OK	73.0321	44.6229	-0.710748	-2.87387	5e-05	0.00203673	yes	CanB	down	FBgn0187024	FBgn0010014	dme:Dmel_CG4209
gene:FBgn0194121	gene:FBgn0194121	Dsim\GD22724	2L:3724673-3844218	Control	HA	OK	13.3022	7.97022	-0.738973	-2.40802	0.00015	0.00464907	yes	capu	down	FBgn0194121	FBgn0000256	dme:Dmel_CG3399
gene:FBgn0191973	gene:FBgn0191973	Dsim\GD20502	3R:11959073-11965002	Control	HA	OK	12.0412	6.13528	-0.972775	-3.82081	5e-05	0.00203673	yes	CCHa2	down	FBgn0191973	FBgn0038147	dme:Dmel_CG14375
gene:FBgn0190528	gene:FBgn0190528	Dsim\GD19020	3R:10029575-10032412	Control	HA	OK	19.054	12.3766	-0.622478	-2.5827	0.00015	0.00464907	yes	Ccm3	down	FBgn0190528	FBgn0038331	dme:Dmel_CG5073
gene:FBgn0186639	gene:FBgn0186639	Dsim\GD14967	3L:20924277-20930431	Control	HA	OK	4.51715	3.28576	-0.459183	-1.82544	0.00275	0.0404197	yes	Cdk12	down	FBgn0186639	FBgn0037093	dme:Dmel_CG7597
gene:FBgn0182960	gene:FBgn0182960	Dsim\GD11207	2R:13139107-13145172	Control	HA	OK	48.2794	35.2622	-0.453286	-1.763	0.0031	0.0440085	yes	Cdk4	down	FBgn0182960	FBgn0016131	dme:Dmel_CG5072
gene:FBgn0196622	gene:FBgn0196622	Dsim\GD25324	2R:15890952-15891492	Control	HA	OK	27.639	17.2074	-0.683673	-3.36897	5e-05	0.00203673	yes	cer	down	FBgn0196622	FBgn0034443	dme:Dmel_CG10460
gene:FBgn0189900	gene:FBgn0189900	Dsim\GD18373	3R:18957032-18959728	Control	HA	OK	4.34525	2.55755	-0.76468	-2.11533	0.00015	0.00464907	yes	CG10182	down	FBgn0189900	FBgn0039091	dme:Dmel_CG10182
gene:FBgn0196440	gene:FBgn0196440	Dsim\GD25128	2R:18803772-18805001	Control	HA	OK	7.51598	4.80457	-0.645555	-1.86685	0.00135	0.0245858	yes	CG10344	down	FBgn0196440	FBgn0034729	dme:Dmel_CG10344
gene:FBgn0182142	gene:FBgn0182142	Dsim\GD10370	2R:2258613-2260247	Control	HA	OK	25.9871	11.4898	-1.17744	-4.20598	5e-05	0.00203673	yes	CG10395	down	FBgn0182142	FBgn0033019	dme:Dmel_CG10395
gene:FBgn0182132	gene:FBgn0182132	Dsim\GD10360	2R:2264829-2267569	Control	HA	OK	29.8759	21.3363	-0.48567	-1.85257	0.00145	0.0260739	yes	CG10417	down	FBgn0182132	FBgn0033021	dme:Dmel_CG10417
gene:FBgn0196498	gene:FBgn0196498	Dsim\GD25186	2R:17997762-18004895	Control	HA	OK	199.288	138.139	-0.528732	-2.01159	0.00085	0.0175996	yes	CG10433	down	FBgn0196498	FBgn0034638	dme:Dmel_CG10433
gene:FBgn0184906	gene:FBgn0184906	Dsim\GD13185	3L:5504400-5505530	Control	HA	OK	4.36734	0.714213	-2.61233	-2.68209	5e-05	0.00203673	yes	CG10591	down	FBgn0184906	FBgn0035621	dme:Dmel_CG10591
gene:FBgn0182720	gene:FBgn0182720	Dsim\GD10958	2R:9812667-9813729	Control	HA	OK	6.65849	3.45952	-0.944625	-3.17056	5e-05	0.00203673	yes	CG10799	down	FBgn0182720	FBgn0033821	dme:Dmel_CG10799
gene:FBgn0183081	gene:FBgn0183081	Dsim\GD11332	2R:14552939-14554859	Control	HA	OK	68.5574	46.2861	-0.566733	-2.20862	0.00025	0.00696927	yes	CG10910	down	FBgn0183081	FBgn0034289	dme:Dmel_CG10910
gene:FBgn0196714	gene:FBgn0196714	Dsim\GD25419	2R:14588076-14589119	Control	HA	OK	53.2897	37.2975	-0.514777	-1.86888	0.0031	0.0440085	yes	CG10912	down	FBgn0196714	FBgn0034296	dme:Dmel_CG10912
gene:FBgn0191203	gene:FBgn0191203	Dsim\GD19713	3R:78259-79805	Control	HA	OK	0.789031	0.377467	-1.06373	-2.05165	0.0024	0.036963	yes	CG1092	down	FBgn0191203	FBgn0037228	dme:Dmel_CG1092
gene:FBgn0184419	gene:FBgn0184419	Dsim\GD12692	3L:12539082-12544850	Control	HA	OK	3.63358	2.3818	-0.609338	-2.11451	0.00035	0.00897943	yes	CG10948	down	FBgn0184419	FBgn0036317	dme:Dmel_CG10948
gene:FBgn0194750	gene:FBgn0194750	Dsim\GD23364	2L:5609123-5613425	Control	HA	OK	14.6864	10.096	-0.540698	-2.12953	0.0003	0.00809189	yes	CG11034	down	FBgn0194750	FBgn0031741	dme:Dmel_CG11034
gene:FBgn0195758	gene:FBgn0195758	Dsim\GD24422	4:930880-941616	Control	HA	OK	4.0603	2.40795	-0.753786	-2.69385	5e-05	0.00203673	yes	CG11155	down	FBgn0195758	FBgn0039927	dme:Dmel_CG11155
gene:FBgn0188708	gene:FBgn0188708	Dsim\GD17139	X:12895891-12897176	Control	HA	OK	0.672894	0.263303	-1.35366	-3.01891	5e-05	0.00203673	yes	CG11162	down	FBgn0188708	FBgn0030509	dme:Dmel_CG11162
gene:FBgn0186104	gene:FBgn0186104	Dsim\GD14421	3L:12699610-12700441	Control	HA	OK	441.219	324.758	-0.442131	-1.87211	0.00355	0.0481372	yes	CG11267	down	FBgn0186104	FBgn0036334	dme:Dmel_CG11267
gene:FBgn0183862	gene:FBgn0183862	Dsim\GD12125	3L:20737009-20739618	Control	HA	OK	24.4788	16.9432	-0.530826	-1.80756	0.00235	0.0363612	yes	CG11309	down	FBgn0183862	FBgn0037070	dme:Dmel_CG11309
gene:FBgn0185548	gene:FBgn0185548	Dsim\GD13851	3L:4487657-4498487	Control	HA	OK	15.7142	11.1759	-0.491688	-2.01303	0.00235	0.0363612	yes	CG11357	down	FBgn0185548	FBgn0035558	dme:Dmel_CG11357
gene:FBgn0195748	gene:FBgn0195748	Dsim\GD24410	4:505261-513158	Control	HA	OK	1.47982	0.938713	-0.656664	-2.10374	0.00095	0.0191535	yes	CG11360	down	FBgn0195748	FBgn0039920	dme:Dmel_CG11360
gene:FBgn0194406	gene:FBgn0194406	Dsim\GD23014	2L:278661-279303	Control	HA	OK	57.664	39.5383	-0.544419	-1.89594	0.00115	0.0221992	yes	CG11562	down	FBgn0194406	FBgn0031247	dme:Dmel_CG11562
gene:FBgn0190402	gene:FBgn0190402	Dsim\GD18891	3R:12084986-12086874	Control	HA	OK	35.4214	15.6963	-1.1742	-3.34792	5e-05	0.00203673	yes	CG11686	down	FBgn0190402	FBgn0040551	dme:Dmel_CG11686
gene:FBgn0192619	gene:FBgn0192619	Dsim\GD21168	3R:20406206-20407316	Control	HA	OK	31.813	18.9979	-0.743777	-2.50525	0.0001	0.0035265	yes	CG11839	down	FBgn0192619	FBgn0039271	dme:Dmel_CG11839
gene:FBgn0192654	gene:FBgn0192654	Dsim\GD21203	3R:20617406-20619021	Control	HA	OK	123.951	87.7663	-0.498036	-1.87309	0.0016	0.0278674	yes	CG11892	down	FBgn0192654	FBgn0039313	dme:Dmel_CG11892
gene:FBgn0192621	gene:FBgn0192621	Dsim\GD21170	3R:20411298-20412734	Control	HA	OK	50.2961	35.7593	-0.49213	-1.91661	0.0027	0.03992	yes	CG11920	down	FBgn0192621	FBgn0039274	dme:Dmel_CG11920
gene:FBgn0185462	gene:FBgn0185462	Dsim\GD13762	3L:3273271-3274479	Control	HA	OK	6.01724	3.95734	-0.604573	-2.07342	0.0006	0.0138291	yes	CG12012	down	FBgn0185462	FBgn0035444	dme:Dmel_CG12012
gene:FBgn0188515	gene:FBgn0188515	Dsim\GD16935	X:8619957-8620716	Control	HA	OK	2637.14	1757.47	-0.585474	-2.15684	0.00035	0.00897943	yes	CG12057	down	FBgn0188515	FBgn0030098	dme:Dmel_CG12057
gene:FBgn0191318	gene:FBgn0191318	Dsim\GD19829	3R:1540412-1549155	Control	HA	OK	17.0894	9.84723	-0.795309	-2.83253	5e-05	0.00203673	yes	CG1208	down	FBgn0191318	FBgn0037386	dme:Dmel_CG1208
gene:FBgn0269570	gene:FBgn0269570	Dsim\GD28280	X:8012198-8013551	Control	HA	OK	37.2054	22.5579	-0.72188	-2.59478	5e-05	0.00203673	yes	CG12112	down	FBgn0269570	FBgn0030048	dme:Dmel_CG12112
gene:FBgn0187754	gene:FBgn0187754	Dsim\GD16118	X:7894862-7895933	Control	HA	OK	6.95755	4.65825	-0.578789	-1.90084	0.0017	0.0291512	yes	CG12123	down	FBgn0187754	FBgn0030039	dme:Dmel_CG12123
gene:FBgn0182473	gene:FBgn0182473	Dsim\GD10708	2R:6696222-6697627	Control	HA	OK	18.6071	12.6111	-0.561158	-1.91478	0.00055	0.0129458	yes	CG12129	down	FBgn0182473	FBgn0033475	dme:Dmel_CG12129
gene:FBgn0187532	gene:FBgn0187532	Dsim\GD15879	X:12897436-12899505	Control	HA	OK	10.6507	7.46726	-0.512301	-4.01353	0.0013	0.0239373	yes	CG12177	down	FBgn0187532	FBgn0030510	dme:Dmel_CG12177
gene:FBgn0194688	gene:FBgn0194688	Dsim\GD23302	2L:4658781-4662122	Control	HA	OK	8.84515	4.77229	-0.890207	-2.60453	5e-05	0.00203673	yes	CG12194	down	FBgn0194688	FBgn0031636	dme:Dmel_CG12194
gene:FBgn0195120	gene:FBgn0195120	Dsim\GD23747	2L:10645128-10646562	Control	HA	OK	27.1148	18.1942	-0.5756	-1.89638	0.0012	0.0226818	yes	CG12253	down	FBgn0195120	FBgn0026148	dme:Dmel_CG12253
gene:FBgn0182682	gene:FBgn0182682	Dsim\GD10919	2R:9351006-9352662	Control	HA	OK	2017.3	1343.12	-0.586833	-1.78288	0.00245	0.0375015	yes	CG12374	down	FBgn0182682	FBgn0033774	dme:Dmel_CG12374
gene:FBgn0195114	gene:FBgn0195114	Dsim\GD23741	2L:10544626-10545460	Control	HA	OK	2.7592	1.15111	-1.26123	-2.87469	5e-05	0.00203673	yes	CG12517	down	FBgn0195114	FBgn0032311	dme:Dmel_CG12517
gene:FBgn0270476	gene:FBgn0270476	Dsim\GD29186	2R:1747887-1750604	Control	HA	OK	6.8036	4.07429	-0.739747	-2.9198	5e-05	0.00203673	yes	CG12547	down	FBgn0270476	FBgn0250830	dme:Dmel_CG12547
gene:FBgn0268188	gene:FBgn0268188	Dsim\GD26898	2L:23425189-23435976	Control	HA	OK	23.2008	15.0513	-0.62429	-2.39736	5e-05	0.00203673	yes	CG12567	down	FBgn0268188	FBgn0039958	dme:Dmel_CG12567
gene:FBgn0195975	gene:FBgn0195975	Dsim\GD24647	X:9638266-9639398	Control	HA	OK	1.96794	1.15906	-0.763729	-2.32324	0.00075	0.0163072	yes	CG12643	down	FBgn0195975	FBgn0040942	dme:Dmel_CG12643
gene:FBgn0185028	gene:FBgn0185028	Dsim\GD13309	3L:3826791-3828300	Control	HA	OK	11.5797	5.51964	-1.06895	-2.59241	0.0002	0.00581924	yes	CG12766	down	FBgn0185028	FBgn0035476	dme:Dmel_CG12766
gene:FBgn0192194	gene:FBgn0192194	Dsim\GD20728	3R:15034377-15052550	Control	HA	OK	8.52322	5.11685	-0.736142	-2.18007	0.0003	0.00809189	yes	CG12814	down	FBgn0192194	FBgn0037796	dme:Dmel_CG12814
gene:FBgn0269623	gene:FBgn0269623	Dsim\GD28333	2R:11193877-11194750	Control	HA	OK	13.3968	7.77277	-0.785383	-2.76509	5e-05	0.00203673	yes	CG12868	down	FBgn0269623	FBgn0033945	dme:Dmel_CG12868
gene:FBgn0183865	gene:FBgn0183865	Dsim\GD12128	3L:20716857-20720270	Control	HA	OK	14.0216	8.98897	-0.641428	-2.17988	0.0005	0.0119378	yes	CG12974	down	FBgn0183865	FBgn0037065	dme:Dmel_CG12974
gene:FBgn0183871	gene:FBgn0183871	Dsim\GD12134	3L:20651362-20657932	Control	HA	OK	48.4308	32.1673	-0.590327	-1.87874	0.0022	0.0348508	yes	CG12975	down	FBgn0183871	FBgn0037061	dme:Dmel_CG12975
gene:FBgn0186273	gene:FBgn0186273	Dsim\GD14593	3L:15694306-15695372	Control	HA	OK	41.8299	26.4627	-0.660572	-2.7525	5e-05	0.00203673	yes	CG13075	down	FBgn0186273	FBgn0036563	dme:Dmel_CG13075
gene:FBgn0194961	gene:FBgn0194961	Dsim\GD23583	2L:8710447-8711144	Control	HA	OK	10.4253	6.2233	-0.744337	-2.11092	0.0011	0.0217386	yes	CG13102	down	FBgn0194961	FBgn0032088	dme:Dmel_CG13102
gene:FBgn0185820	gene:FBgn0185820	Dsim\GD14131	3L:8587374-8588276	Control	HA	OK	94.2124	62.4576	-0.59304	-2.79063	0.00015	0.00464907	yes	CG13309	down	FBgn0185820	FBgn0035933	dme:Dmel_CG13309
gene:FBgn0185842	gene:FBgn0185842	Dsim\GD14154	3L:8866516-8867136	Control	HA	OK	334.008	211.315	-0.660491	-2.38518	0.00015	0.00464907	yes	CG13315	down	FBgn0185842	FBgn0040827	dme:Dmel_CG13315
gene:FBgn0268763	gene:FBgn0268763	Dsim\GD27473	X:18419237-18420315	Control	HA	OK	174.93	114.668	-0.609315	-2.52416	5e-05	0.00203673	yes	CG13426	down	FBgn0268763	FBgn0034510	dme:Dmel_CG13426
gene:FBgn0192656	gene:FBgn0192656	Dsim\GD21205	3R:20621242-20622762	Control	HA	OK	12.2845	6.41935	-0.936337	-2.88327	5e-05	0.00203673	yes	CG13658	down	FBgn0192656	FBgn0039315	dme:Dmel_CG13658
gene:FBgn0192657	gene:FBgn0192657	Dsim\GD21206	3R:20623267-20624920	Control	HA	OK	12.3151	6.57443	-0.90549	-3.06383	5e-05	0.00203673	yes		down	FBgn0192657	FBgn0039315
gene:FBgn0192658	gene:FBgn0192658	Dsim\GD21207	3R:20626053-20627527	Control	HA	OK	7.1247	3.54594	-1.00666	-2.82279	5e-05	0.00203673	yes		down	FBgn0192658	FBgn0039315
gene:FBgn0192655	gene:FBgn0192655	Dsim\GD21204	3R:20619396-20621006	Control	HA	OK	5.96325	3.35806	-0.828471	-2.28447	0.00025	0.00696927	yes		down	FBgn0192655	FBgn0039315
gene:FBgn0192660	gene:FBgn0192660	Dsim\GD21209	3R:20630429-20631955	Control	HA	OK	5.01148	3.09607	-0.6948	-1.9158	0.00115	0.0221992	yes		down	FBgn0192660	FBgn0039315
gene:FBgn0189760	gene:FBgn0189760	Dsim\GD18226	3R:20549115-20549974	Control	HA	OK	26.0465	16.8775	-0.625988	-2.13568	0.00015	0.00464907	yes	CG13663	down	FBgn0189760	FBgn0039291	dme:Dmel_CG13663
gene:FBgn0194428	gene:FBgn0194428	Dsim\GD23037	2L:576335-577184	Control	HA	OK	31.4247	17.3508	-0.856902	-2.19208	0.00015	0.00464907	yes	CG13689	down	FBgn0194428	FBgn0031270	dme:Dmel_CG13689
gene:FBgn0193937	gene:FBgn0193937	Dsim\GD22536	2L:6675085-6676172	Control	HA	OK	21.8192	14.1756	-0.622191	-2.21691	0.0003	0.00809189	yes	CG13773	down	FBgn0193937	FBgn0042092	dme:Dmel_CG13773
gene:FBgn0193879	gene:FBgn0193879	Dsim\GD22477	2L:7468837-7471569	Control	HA	OK	1.6565	1.01497	-0.706692	-1.96098	0.00115	0.0221992	yes	CG13793	down	FBgn0193879	FBgn0031935	dme:Dmel_CG13793
gene:FBgn0193878	gene:FBgn0193878	Dsim\GD22476	2L:7471911-7474826	Control	HA	OK	4.02373	2.72681	-0.561316	-1.7723	0.0026	0.038961	yes		down	FBgn0193878	FBgn0031935
gene:FBgn0185301	gene:FBgn0185301	Dsim\GD13591	3L:1119840-1120741	Control	HA	OK	145.905	98.4832	-0.567081	-2.11805	0.00015	0.00464907	yes	CG13912	down	FBgn0185301	FBgn0035186	dme:Dmel_CG13912
gene:FBgn0186031	gene:FBgn0186031	Dsim\GD14346	3L:11667291-11668250	Control	HA	OK	43.9371	26.0818	-0.752396	-2.67798	5e-05	0.00203673	yes	CG14125	down	FBgn0186031	FBgn0036232	dme:Dmel_CG14125
gene:FBgn0195785	gene:FBgn0195785	Dsim\GD24449	X:18469233-18470301	Control	HA	OK	22.0188	13.4151	-0.714881	-2.68622	5e-05	0.00203673	yes	CG14229	down	FBgn0195785	FBgn0031059	dme:Dmel_CG14229
gene:FBgn0191923	gene:FBgn0191923	Dsim\GD20452	3R:11227884-11229346	Control	HA	OK	3.94189	2.33369	-0.756275	-1.77858	0.0025	0.0379756	yes	CG14356	down	FBgn0191923	FBgn0038207	dme:Dmel_CG14356
gene:FBgn0269791	gene:FBgn0269791	Dsim\GD28501	2R:1776947-1777599	Control	HA	OK	145.899	102.72	-0.506245	-1.92662	0.00115	0.0221992	yes	CG14464	down	FBgn0269791	FBgn0033000	dme:Dmel_CG14464
gene:FBgn0196755	gene:FBgn0196755	Dsim\GD25461	2R:14120667-14121177	Control	HA	OK	42.2154	28.4854	-0.567547	-2.45185	0.00035	0.00897943	yes	CG14483	down	FBgn0196755	FBgn0034248	dme:Dmel_CG14483
gene:FBgn0269703	gene:FBgn0269703	Dsim\GD28413	JPYS01002127:6-363	Control	HA	OK	41.7081	25.3941	-0.715832	-2.0259	0.00065	0.0146433	yes	CG14500	down	FBgn0269703	FBgn0034318	dme:Dmel_CG14500
gene:FBgn0189699	gene:FBgn0189699	Dsim\GD18162	3R:21172481-21173286	Control	HA	OK	125.298	78.3282	-0.677762	-2.67099	5e-05	0.00203673	yes	CG14545	down	FBgn0189699	FBgn0040602	dme:Dmel_CG14545
gene:FBgn0195764	gene:FBgn0195764	Dsim\GD24428	X:20358117-20359899	Control	HA	OK	78.4305	52.065	-0.591102	-2.25046	0.0001	0.0035265	yes	CG14615	down	FBgn0195764	FBgn0031184	dme:Dmel_CG14615
gene:FBgn0190301	gene:FBgn0190301	Dsim\GD18782	3R:13538060-13539325	Control	HA	OK	26.2931	17.6497	-0.575038	-2.02976	0.00065	0.0146433	yes	CG14721	down	FBgn0190301	FBgn0037942	dme:Dmel_CG14721
gene:FBgn0188027	gene:FBgn0188027	Dsim\GD16410	X:1627954-1628545	Control	HA	OK	36.6545	21.503	-0.769453	-2.81939	5e-05	0.00203673	yes	CG14817	down	FBgn0188027	FBgn0026089	dme:Dmel_CG14817
gene:FBgn0185670	gene:FBgn0185670	Dsim\GD13974	3L:6787767-6789591	Control	HA	OK	12.5103	7.27846	-0.78141	-2.56956	5e-05	0.00203673	yes	CG14820	down	FBgn0185670	FBgn0035718	dme:Dmel_CG14820
gene:FBgn0190609	gene:FBgn0190609	Dsim\GD19102	3R:8966257-8968458	Control	HA	OK	1.58552	0.94829	-0.741555	-2.46274	5e-05	0.00203673	yes	CG14883	down	FBgn0190609	FBgn0038432	dme:Dmel_CG14883
gene:FBgn0191755	gene:FBgn0191755	Dsim\GD20280	3R:8850491-8851054	Control	HA	OK	34.2031	23.5027	-0.5413	-2.0709	0.0025	0.0379756	yes	CG14903	down	FBgn0191755	FBgn0038446	dme:Dmel_CG14903
gene:FBgn0191747	gene:FBgn0191747	Dsim\GD20272	3R:8771749-8772901	Control	HA	OK	6.55196	3.60497	-0.861939	-2.3859	0.0002	0.00581924	yes	CG14907	down	FBgn0191747	FBgn0038455	dme:Dmel_CG14907
gene:FBgn0195130	gene:FBgn0195130	Dsim\GD23758	2L:10728831-10729405	Control	HA	OK	2.53278	0.263516	-3.26476	-2.62884	0.003	0.0429555	yes	CG14915	down	FBgn0195130	FBgn0032335	dme:Dmel_CG14915
gene:FBgn0185496	gene:FBgn0185496	Dsim\GD13796	3L:3891213-3892515	Control	HA	OK	61.9761	39.0678	-0.665731	-2.32711	0.0001	0.0035265	yes	CG14985	down	FBgn0185496	FBgn0035482	dme:Dmel_CG14985
gene:FBgn0185509	gene:FBgn0185509	Dsim\GD13810	3L:4035056-4053054	Control	HA	OK	8.12712	4.9726	-0.708745	-2.24382	5e-05	0.00203673	yes	CG14989	down	FBgn0185509	FBgn0035495	dme:Dmel_CG14989
gene:FBgn0184978	gene:FBgn0184978	Dsim\GD13258	3L:4404630-4405749	Control	HA	OK	0.862874	0	#NAME?	#NAME?	5e-05	0.00203673	yes	CG15022	down	FBgn0184978	FBgn0035547	dme:Dmel_CG15022
gene:FBgn0187294	gene:FBgn0187294	Dsim\GD15631	X:17468483-17469264	Control	HA	OK	90.9481	53.9345	-0.753836	-2.50152	5e-05	0.00203673	yes	CG15043	down	FBgn0187294	FBgn0030929	dme:Dmel_CG15043
gene:FBgn0183164	gene:FBgn0183164	Dsim\GD11415	2R:15326016-15337418	Control	HA	OK	65.4947	40.4628	-0.694783	-2.16828	0.00165	0.0286383	yes	CG15083	down	FBgn0183164	FBgn0034399	dme:Dmel_CG15083
gene:FBgn0186888	gene:FBgn0186888	Dsim\GD15218	2R:15299335-15307368	Control	HA	OK	31.8972	22.9758	-0.473314	-1.87456	0.00215	0.0343312	yes	CG15096	down	FBgn0186888	FBgn0034394	dme:Dmel_CG15096
gene:FBgn0195489	gene:FBgn0195489	Dsim\GD24133	2L:17661041-17662268	Control	HA	OK	40.4176	22.8378	-0.823557	-3.78595	5e-05	0.00203673	yes	CG15155	down	FBgn0195489	FBgn0032669	dme:Dmel_CG15155
gene:FBgn0193366	gene:FBgn0193366	Dsim\GD21951	2L:15195365-15196355	Control	HA	OK	71.1624	30.1687	-1.23806	-4.53994	5e-05	0.00203673	yes	CG15255	down	FBgn0193366	FBgn0028950	dme:Dmel_CG15255
gene:FBgn0194653	gene:FBgn0194653	Dsim\GD23265	2L:3857215-3857881	Control	HA	OK	35.2783	17.4638	-1.01442	-3.82291	5e-05	0.00203673	yes	CG15422	down	FBgn0194653	FBgn0031579	dme:Dmel_CG15422
gene:FBgn0189159	gene:FBgn0189159	Dsim\GD17609	3R:25041141-25042587	Control	HA	OK	44.9629	32.5064	-0.468013	-1.77308	0.0026	0.038961	yes	CG15514	down	FBgn0189159	FBgn0039712	dme:Dmel_CG15514
gene:FBgn0188394	gene:FBgn0188394	Dsim\GD16807	3R:26010831-26012826	Control	HA	OK	4.93484	3.06954	-0.684981	-3.41751	0.0005	0.0119378	yes	CG15546	down	FBgn0188394	FBgn0039807	dme:Dmel_CG15546
gene:FBgn0196543	gene:FBgn0196543	Dsim\GD25231	2R:17459910-17460894	Control	HA	OK	5.18804	2.87687	-0.850689	-2.86715	5e-05	0.00203673	yes	CG15653	down	FBgn0196543	FBgn0034578	dme:Dmel_CG15653
gene:FBgn0184261	gene:FBgn0184261	Dsim\GD12533	3L:15456769-15458473	Control	HA	OK	46.9601	29.4742	-0.671982	-3.20862	5e-05	0.00203673	yes	CG15715	down	FBgn0184261	FBgn0036538	dme:Dmel_CG15715
gene:FBgn0188663	gene:FBgn0188663	Dsim\GD17093	X:12202482-12205686	Control	HA	OK	22.4542	12.5181	-0.842977	-2.97869	5e-05	0.00203673	yes	CG15721	down	FBgn0188663	FBgn0030438	dme:Dmel_CG15721
gene:FBgn0182187	gene:FBgn0182187	Dsim\GD10416	2R:3417940-3418548	Control	HA	OK	18.3486	11.7825	-0.639025	-1.7646	0.0027	0.03992	yes	CG15908	down	FBgn0182187	FBgn0033085	dme:Dmel_CG15908
gene:FBgn0185431	gene:FBgn0185431	Dsim\GD13725	3L:2921290-2922080	Control	HA	OK	38.5302	25.7647	-0.580596	-2.81461	0.0008	0.0169872	yes	CG16753	down	FBgn0185431	FBgn0035393	dme:Dmel_CG16753
gene:FBgn0189465	gene:FBgn0189465	Dsim\GD17919	3L:17444603-17445240	Control	HA	OK	118.812	57.8421	-1.03848	-3.18557	5e-05	0.00203673	yes	CG16775	down	FBgn0189465	FBgn0036767	dme:Dmel_CG16775
gene:FBgn0196614	gene:FBgn0196614	Dsim\GD25316	2R:15991662-15995307	Control	HA	OK	136.178	88.157	-0.627347	-2.55931	5e-05	0.00203673	yes	CG16926	down	FBgn0196614	FBgn0040732	dme:Dmel_CG16926
gene:FBgn0193471	gene:FBgn0193471	Dsim\GD22058	2L:12988635-12989537	Control	HA	OK	22.3724	13.9755	-0.67882	-2.00027	0.00075	0.0163072	yes	CG16956	down	FBgn0193471	FBgn0032523	dme:Dmel_CG16956
gene:FBgn0193500	gene:FBgn0193500	Dsim\GD22087	2L:12724714-12725170	Control	HA	OK	91.6511	53.4583	-0.777738	-2.50269	5e-05	0.00203673	yes	CG16978	down	FBgn0193500	FBgn0040972	dme:Dmel_CG16978
gene:FBgn0187139	gene:FBgn0187139	Dsim\GD15472	2R:3190999-3204210	Control	HA	OK	10.1892	7.12943	-0.515186	-2.07693	0.00195	0.0321139	yes	CG17163	down	FBgn0187139	FBgn0039942	dme:Dmel_CG17163
gene:FBgn0084877	gene:FBgn0084877	Dsim\GD17014	X:10656570-10657368	Control	HA	OK	13.3831	8.11772	-0.72127	-2.20455	0.0005	0.0119378	yes	CG1738	down	FBgn0084877	FBgn0030291	dme:Dmel_CG1738
gene:FBgn0268919	gene:FBgn0268919	Dsim\GD27629	3L:23601243-23602941	Control	HA	OK	42.9719	24.7406	-0.796511	-2.95895	5e-05	0.00203673	yes	CG17454	down	FBgn0268919	FBgn0039977	dme:Dmel_CG17454
gene:FBgn0270478	gene:FBgn0270478	Dsim\GD29188	3L:22991179-22992901	Control	HA	OK	42.7254	24.3007	-0.8141	-3.0023	5e-05	0.00203673	yes		down	FBgn0270478	FBgn0039977
gene:FBgn0189255	gene:FBgn0189255	Dsim\GD17706	2L:21664646-21699343	Control	HA	OK	23.7417	13.1497	-0.852397	-3.82291	5e-05	0.00203673	yes	CG17493	down	FBgn0189255	FBgn0040010	dme:Dmel_CG17493
gene:FBgn0182148	gene:FBgn0182148	Dsim\GD10376	2R:2455798-2459024	Control	HA	OK	157.782	95.8699	-0.718784	-2.57736	5e-05	0.00203673	yes	CG17508	down	FBgn0182148	FBgn0039970	dme:Dmel_CG17508
gene:FBgn0189248	gene:FBgn0189248	Dsim\GD17699	JPYS01005875:6894-9611	Control	HA	OK	15.789	10.1111	-0.642984	-2.44218	5e-05	0.00203673	yes	CG17528	down	FBgn0189248	FBgn0261387	dme:Dmel_CG17528
gene:FBgn0194626	gene:FBgn0194626	Dsim\GD23238	2L:3374262-3376635	Control	HA	OK	36.2489	26.6584	-0.443344	-1.78207	0.00315	0.0443399	yes	CG17593	down	FBgn0194626	FBgn0031544	dme:Dmel_CG17593
gene:FBgn0189247	gene:FBgn0189247	Dsim\GD17698	2R:11970-13962	Control	HA	OK	45.281	27.1271	-0.739173	-2.74755	5e-05	0.00203673	yes	CG17683	down	FBgn0189247	FBgn0262115	dme:Dmel_CG17683
gene:FBgn0268563	gene:FBgn0268563	Dsim\GD27273	3L:23569598-23582564	Control	HA	OK	0.798444	0.426248	-0.905499	-2.15338	0.0004	0.010005	yes	CG17684	down	FBgn0268563	FBgn0263780	dme:Dmel_CG17684
gene:FBgn0268659	gene:FBgn0268659	Dsim\GD27369	3L:23016069-23026983	Control	HA	OK	13.4515	8.58173	-0.648422	-2.53111	5e-05	0.00203673	yes	CG17698	down	FBgn0268659	FBgn0040056	dme:Dmel_CG17698
gene:FBgn0190803	gene:FBgn0190803	Dsim\GD19300	3R:5828146-5830386	Control	HA	OK	32.9847	21.4147	-0.623194	-2.31464	5e-05	0.00203673	yes	CG17751	down	FBgn0190803	FBgn0038717	dme:Dmel_CG17751
gene:FBgn0188552	gene:FBgn0188552	Dsim\GD16974	X:9723329-9738247	Control	HA	OK	50.7279	34.3074	-0.564261	-2.26518	0.0002	0.00581924	yes	CG17841	down	FBgn0188552	FBgn0028480	dme:Dmel_CG17841
gene:FBgn0193002	gene:FBgn0193002	Dsim\GD21577	2R:1561934-1563709	Control	HA	OK	12.7091	7.38699	-0.782807	-2.92834	5e-05	0.00203673	yes	CG17883	down	FBgn0193002	FBgn0040005	dme:Dmel_CG17883
gene:FBgn0194958	gene:FBgn0194958	Dsim\GD23580	2L:8697223-8699523	Control	HA	OK	2.47403	1.59629	-0.632142	-1.78421	0.00295	0.0423612	yes	CG17906	down	FBgn0194958	FBgn0032086	dme:Dmel_CG17906
gene:FBgn0193433	gene:FBgn0193433	Dsim\GD22020	2L:13565543-13570116	Control	HA	OK	6.89676	4.46231	-0.628129	-2.22065	0.0016	0.0278674	yes	CG18095	down	FBgn0193433	FBgn0028872	dme:Dmel_CG18095
gene:FBgn0190043	gene:FBgn0190043	Dsim\GD18520	3R:16920551-16922642	Control	HA	OK	6.90804	4.55796	-0.59989	-1.76055	0.0027	0.03992	yes	CG18249	down	FBgn0190043	FBgn0037553	dme:Dmel_CG18249
gene:FBgn0195091	gene:FBgn0195091	Dsim\GD23715	2L:10218238-10220236	Control	HA	OK	2.41694	1.14692	-1.07541	-2.86423	5e-05	0.00203673	yes	CG18302	down	FBgn0195091	FBgn0032266	dme:Dmel_CG18302
gene:FBgn0192938	gene:FBgn0192938	Dsim\GD21512	3R:25422897-25423840	Control	HA	OK	406.964	295.08	-0.463794	-1.81158	0.0025	0.0379756	yes	CG18404	down	FBgn0192938	FBgn0039761	dme:Dmel_CG18404
gene:FBgn0193884	gene:FBgn0193884	Dsim\GD22482	2L:7393689-7442825	Control	HA	OK	28.6591	15.0721	-0.927117	-2.40136	0.00015	0.00464907	yes	CG18585	down	FBgn0193884	FBgn0031929	dme:Dmel_CG18585
gene:FBgn0192890	gene:FBgn0192890	Dsim\GD21456	3R:24908601-24909282	Control	HA	OK	22.6184	13.1694	-0.780307	-3.02355	5e-05	0.00203673	yes	CG18731	down	FBgn0192890	FBgn0042213	dme:Dmel_CG18731
gene:FBgn0190714	gene:FBgn0190714	Dsim\GD19209	3R:22508686-22512596	Control	HA	OK	5.9728	4.11514	-0.537463	-1.98676	0.00365	0.049093	yes	CG18766	down	FBgn0190714	FBgn0042111	dme:Dmel_CG18766
gene:FBgn0196102	gene:FBgn0196102	Dsim\GD24781	X:9384783-9397136	Control	HA	OK	9.92957	5.90365	-0.750124	-1.94672	0.00085	0.0175996	yes	CG1889	down	FBgn0196102	FBgn0030164	dme:Dmel_CG1889
gene:FBgn0187023	gene:FBgn0187023	Dsim\GD15355	2R:4442262-4444984	Control	HA	OK	3.79926	2.44007	-0.638795	-2.36185	0.00035	0.00897943	yes	CG1946	down	FBgn0187023	FBgn0033216	dme:Dmel_CG1946
gene:FBgn0187770	gene:FBgn0187770	Dsim\GD16135	X:7490696-7492653	Control	HA	OK	370.057	254.449	-0.540371	-1.69523	0.0035	0.0477186	yes	CG2233	down	FBgn0187770	FBgn0029990	dme:Dmel_CG2233
gene:FBgn0189312	gene:FBgn0189312	Dsim\GD17764	3R:24677290-24679273	Control	HA	OK	65.2358	17.1528	-1.92722	-4.47695	5e-05	0.00203673	yes	CG2310	down	FBgn0189312	FBgn0039665	dme:Dmel_CG2310
gene:FBgn0195618	gene:FBgn0195618	Dsim\GD24270	2L:20066423-20069634	Control	HA	OK	12.4893	7.48367	-0.738872	-3.2363	5e-05	0.00203673	yes	CG2608	down	FBgn0195618	FBgn0032870	dme:Dmel_CG2608
gene:FBgn0196832	gene:FBgn0196832	Dsim\GD25546	2R:12877680-12878971	Control	HA	OK	3.71473	2.26773	-0.712011	-1.93593	0.00185	0.0311349	yes	CG30096	down	FBgn0196832	FBgn0050096	dme:Dmel_CG30096
gene:FBgn0183050	gene:FBgn0183050	Dsim\GD11301	2R:14204304-14205755	Control	HA	OK	56.6985	31.1815	-0.86262	-3.48422	5e-05	0.00203673	yes	CG30109	down	FBgn0183050	FBgn0050109	dme:Dmel_CG30109
gene:FBgn0196588	gene:FBgn0196588	Dsim\GD25278	2R:16941818-16942838	Control	HA	OK	6.74074	3.90386	-0.788005	-2.08288	0.0007	0.0154558	yes	CG30151	down	FBgn0196588	FBgn0050151	dme:Dmel_CG30151
gene:FBgn0182819	gene:FBgn0182819	Dsim\GD11059	2R:11098247-11101703	Control	HA	OK	81.2992	47.4965	-0.775419	-2.32116	0.00015	0.00464907	yes	CG30197	down	FBgn0182819	FBgn0050197	dme:Dmel_CG30197
gene:FBgn0196522	gene:FBgn0196522	Dsim\GD25210	2R:17687953-17689149	Control	HA	OK	23.0951	14.4296	-0.678559	-2.71163	0.00015	0.00464907	yes	CG30392	down	FBgn0196522	FBgn0050392	dme:Dmel_CG30392
gene:FBgn0196373	gene:FBgn0196373	Dsim\GD25061	2R:19694518-19695201	Control	HA	OK	0.568945	0	#NAME?	#NAME?	5e-05	0.00203673	yes	CG30413	down	FBgn0196373	FBgn0050413	dme:Dmel_CG30413
gene:FBgn0182172	gene:FBgn0182172	Dsim\GD10401	2R:3087332-3089762	Control	HA	OK	8.62733	4.67912	-0.882676	-1.82611	0.002	0.032775	yes	CG30431	down	FBgn0182172	FBgn0050431	dme:Dmel_CG30431
gene:FBgn0068685	gene:FBgn0068685	Dsim\GD16604	X:1994326-1996148	Control	HA	OK	57.0743	39.4175	-0.534005	-2.13532	0.0008	0.0169872	yes	CG3071	down	FBgn0068685	FBgn0023527	dme:Dmel_CG3071
gene:FBgn0188269	gene:FBgn0188269	Dsim\GD16680	2R:2018324-2023047	Control	HA	OK	22.4506	11.5086	-0.964047	-3.56085	5e-05	0.00203673	yes	CG3107	down	FBgn0188269	FBgn0033005	dme:Dmel_CG3107
gene:FBgn0189744	gene:FBgn0189744	Dsim\GD18209	3R:20651556-20654350	Control	HA	OK	8.64011	5.36658	-0.687047	-1.91648	0.00145	0.0260739	yes	CG31087	down	FBgn0189744	FBgn0051087	dme:Dmel_CG31087
gene:FBgn0192697	gene:FBgn0192697	Dsim\GD21247	3R:21224874-21226573	Control	HA	OK	1.93686	0.703709	-1.46067	-2.68318	0.0001	0.0035265	yes	CG31089	down	FBgn0192697	FBgn0051089	dme:Dmel_CG31089
gene:FBgn0192696	gene:FBgn0192696	Dsim\GD21246	3R:21222131-21224493	Control	HA	OK	7.58741	2.84083	-1.4173	-4.91081	5e-05	0.00203673	yes	CG31091	down	FBgn0192696	FBgn0051091	dme:Dmel_CG31091
gene:FBgn0189774	gene:FBgn0189774	Dsim\GD18240	3R:20391374-20392583	Control	HA	OK	5.30227	2.99114	-0.825916	-2.31534	0.0001	0.0035265	yes	CG31111	down	FBgn0189774	FBgn0051111	dme:Dmel_CG31111
gene:FBgn0190648	gene:FBgn0190648	Dsim\GD19143	3R:8298919-8299991	Control	HA	OK	68.1721	49.2455	-0.46919	-1.82078	0.00325	0.0453003	yes	CG31267	down	FBgn0190648	FBgn0051267	dme:Dmel_CG31267
gene:FBgn0192662	gene:FBgn0192662	Dsim\GD21211	3R:20642822-20644419	Control	HA	OK	1.7316	0.850915	-1.02502	-2.21501	0.0011	0.0217386	yes	CG31370	down	FBgn0192662	FBgn0051370	dme:Dmel_CG31370
gene:FBgn0190543	gene:FBgn0190543	Dsim\GD19036	3R:9722003-9723108	Control	HA	OK	25.6208	13.3767	-0.937594	-2.90445	5e-05	0.00203673	yes	CG31446	down	FBgn0190543	FBgn0051446	dme:Dmel_CG31446
gene:FBgn0193959	gene:FBgn0193959	Dsim\GD22558	2L:6429994-6431864	Control	HA	OK	2.37686	1.14191	-1.05761	-2.09589	0.0002	0.00581924	yes	CG31636	down	FBgn0193959	FBgn0051636	dme:Dmel_CG31636
gene:FBgn0183722	gene:FBgn0183722	Dsim\GD11983	2L:4853892-4856371	Control	HA	OK	19.3791	13.674	-0.503063	-1.82752	0.00325	0.0453003	yes	CG31650	down	FBgn0183722	FBgn0031673	dme:Dmel_CG31650
gene:FBgn0195057	gene:FBgn0195057	Dsim\GD23680	2L:10019826-10020670	Control	HA	OK	110.451	74.1034	-0.575789	-2.12538	0.0002	0.00581924	yes	CG31715	down	FBgn0195057	FBgn0051715	dme:Dmel_CG31715
gene:FBgn0195255	gene:FBgn0195255	Dsim\GD23885	2L:12868902-12880074	Control	HA	OK	29.1299	20.5426	-0.503887	-2.02963	0.00085	0.0175996	yes	CG31729	down	FBgn0195255	FBgn0051729	dme:Dmel_CG31729
gene:FBgn0195448	gene:FBgn0195448	Dsim\GD24092	2L:16398754-16405544	Control	HA	OK	6.46221	4.5119	-0.518293	-1.83186	0.00365	0.049093	yes	CG31743	down	FBgn0195448	FBgn0032618	dme:Dmel_CG31743
gene:FBgn0194128	gene:FBgn0194128	Dsim\GD22731	2L:3556662-3558583	Control	HA	OK	11.6582	7.47493	-0.641218	-1.68239	0.0032	0.044791	yes	CG31778	down	FBgn0194128	FBgn0051778	dme:Dmel_CG31778
gene:FBgn0193420	gene:FBgn0193420	Dsim\GD22007	4:168328-177805	Control	HA	OK	6.92757	5.01986	-0.464702	-1.89688	0.00235	0.0363612	yes	CG31998	down	FBgn0193420	FBgn0051998	dme:Dmel_CG31998
gene:FBgn0184414	gene:FBgn0184414	Dsim\GD12687	3L:12597200-12605309	Control	HA	OK	1.68724	1.14241	-0.562583	-1.86432	0.0032	0.044791	yes	CG32115	down	FBgn0184414	FBgn0052115	dme:Dmel_CG32115
gene:FBgn0186438	gene:FBgn0186438	Dsim\GD14764	3L:18208578-18209266	Control	HA	OK	33.6686	23.1407	-0.540968	-1.74643	0.00335	0.0463061	yes	CG32202	down	FBgn0186438	FBgn0052202	dme:Dmel_CG32202
gene:FBgn0184967	gene:FBgn0184967	Dsim\GD13247	3L:4484871-4486799	Control	HA	OK	3.47963	2.19672	-0.663581	-1.74338	0.00345	0.0471658	yes	CG32243	down	FBgn0184967	FBgn0052243	dme:Dmel_CG32243
gene:FBgn0187251	gene:FBgn0187251	Dsim\GD15586	X:18058411-18060393	Control	HA	OK	20.9754	12.5646	-0.739327	-2.19549	0.0005	0.0119378	yes	CG32536	down	FBgn0187251	FBgn0052536	dme:Dmel_CG32536
gene:FBgn0187566	gene:FBgn0187566	Dsim\GD15917	X:12016439-12023643	Control	HA	OK	19.189	11.042	-0.797277	-2.554	5e-05	0.00203673	yes	CG32647	down	FBgn0187566	FBgn0052647	dme:Dmel_CG32647
gene:FBgn0187837	gene:FBgn0187837	Dsim\GD16209	X:5711088-5712957	Control	HA	OK	1.62884	0.850758	-0.937026	-1.90916	0.0019	0.0316561	yes	CG32750	down	FBgn0187837	FBgn0052750	dme:Dmel_CG32750
gene:FBgn0187835	gene:FBgn0187835	Dsim\GD16207	X:5716671-5719039	Control	HA	OK	36.2615	18.6443	-0.959706	-3.42333	5e-05	0.00203673	yes	CG32751	down	FBgn0187835	FBgn0052751	dme:Dmel_CG32751
gene:FBgn0195741	gene:FBgn0195741	Dsim\GD24403	4:278465-282523	Control	HA	OK	12.5221	8.55147	-0.550233	-2.31183	0.0002	0.00581924	yes	CG32850	down	FBgn0195741	FBgn0052850	dme:Dmel_CG32850
gene:FBgn0187868	gene:FBgn0187868	Dsim\GD16241	X:5226837-5245593	Control	HA	OK	70.208	48.0928	-0.545816	-1.89001	0.00115	0.0221992	yes	CG33080	down	FBgn0187868	FBgn0053080	dme:Dmel_CG33080
gene:FBgn0189975	gene:FBgn0189975	Dsim\GD18451	3R:17880654-17882306	Control	HA	OK	12.1459	7.60034	-0.676335	-1.96263	0.00045	0.0109804	yes	CG33099	down	FBgn0189975	FBgn0053099	dme:Dmel_CG33099
gene:FBgn0191913	gene:FBgn0191913	Dsim\GD20442	3R:11151873-11152942	Control	HA	OK	520.112	354.012	-0.555023	-1.77584	0.002	0.032775	yes	CG33109	down	FBgn0191913	FBgn0053109	dme:Dmel_CG33109
gene:FBgn0195569	gene:FBgn0195569	Dsim\GD24219	2L:19028344-19032001	Control	HA	OK	8.95556	5.73561	-0.642835	-2.27795	0.00015	0.00464907	yes	CG33116	down	FBgn0195569	FBgn0053116	dme:Dmel_CG33116
gene:FBgn0194489	gene:FBgn0194489	Dsim\GD23099	2L:1431275-1432663	Control	HA	OK	152.186	75.508	-1.01114	-3.93252	5e-05	0.00203673	yes	CG33128	down	FBgn0194489	FBgn0053128	dme:Dmel_CG33128
gene:FBgn0186738	gene:FBgn0186738	Dsim\GD15066	3L:22463664-22468388	Control	HA	OK	6.53434	2.90979	-1.16713	-4.22439	5e-05	0.00203673	yes	CG33217	down	FBgn0186738	FBgn0053217	dme:Dmel_CG33217
gene:FBgn0270647	gene:FBgn0270647	Dsim\GD29357	3L:22450635-22455359	Control	HA	OK	6.57741	2.77223	-1.24647	-4.50357	5e-05	0.00203673	yes		down	FBgn0270647	FBgn0053217
gene:FBgn0194610	gene:FBgn0194610	Dsim\GD23221	2L:3187843-3189748	Control	HA	OK	5.66432	3.21569	-0.816776	-2.11096	0.0004	0.010005	yes	CG33282	down	FBgn0194610	FBgn0053282	dme:Dmel_CG33282
gene:FBgn0196601	gene:FBgn0196601	Dsim\GD25303	2R:16430198-16431602	Control	HA	OK	8.7569	4.78739	-0.871181	-2.52394	5e-05	0.00203673	yes	CG33301	down	FBgn0196601	FBgn0053301	dme:Dmel_CG33301
gene:FBgn0189625	gene:FBgn0189625	Dsim\GD18082	3R:22558656-22559956	Control	HA	OK	39.8834	28.1094	-0.504735	-2.36281	0.0008	0.0169872	yes	CG3348	down	FBgn0189625	FBgn0040609	dme:Dmel_CG3348
gene:FBgn0189727	gene:FBgn0189727	Dsim\GD18191	3R:20832254-20833564	Control	HA	OK	4.65232	2.39915	-0.955425	-2.33734	5e-05	0.00203673	yes	CG33494	down	FBgn0189727	FBgn0053494	dme:Dmel_CG33494
gene:FBgn0185305	gene:FBgn0185305	Dsim\GD13595	3L:1159064-1160361	Control	HA	OK	22.8951	10.4611	-1.13	-3.70219	5e-05	0.00203673	yes	CG33966	down	FBgn0185305	FBgn0053966	dme:Dmel_CG33966
gene:FBgn0187409	gene:FBgn0187409	Dsim\GD15748	X:15439404-15440297	Control	HA	OK	13.6931	8.72977	-0.649431	-3.0836	0.00095	0.0191535	yes	CG34015	down	FBgn0187409	FBgn0054015	dme:Dmel_CG34015
gene:FBgn0270339	gene:FBgn0270339	Dsim\GD29049	3L:616180-617525	Control	HA	OK	37.8309	25.5577	-0.565808	-2.33003	0.00045	0.0109804	yes	CG3402	down	FBgn0270339	FBgn0035148	dme:Dmel_CG3402
gene:FBgn0196097	gene:FBgn0196097	Dsim\GD24776	X:8935405-8977859	Control	HA	OK	203.752	136.92	-0.573486	-2.69483	0.0002	0.00581924	yes	CG34026	down	FBgn0196097	FBgn0054026	dme:Dmel_CG34026
gene:FBgn0185292	gene:FBgn0185292	Dsim\GD13582	3L:849268-853027	Control	HA	OK	1.37184	0.865911	-0.66382	-2.39623	0.00025	0.00696927	yes	CG34056	down	FBgn0185292	FBgn0054056	dme:Dmel_CG34056
gene:FBgn0192265	gene:FBgn0192265	Dsim\GD20802	3R:15800584-15801119	Control	HA	OK	256.351	171.575	-0.579276	-2.28206	0.00025	0.00696927	yes	CG34117	down	FBgn0192265	FBgn0083953	dme:Dmel_CG34117
gene:FBgn0269997	gene:FBgn0269997	Dsim\GD28707	2L:7629438-7633645	Control	HA	OK	84.3253	38.739	-1.12218	-2.91331	5e-05	0.00203673	yes	CG34132	down	FBgn0269997	FBgn0083968	dme:Dmel_CG34132
gene:FBgn0183057	gene:FBgn0183057	Dsim\GD11308	2R:14267774-14269021	Control	HA	OK	15.1477	10.6123	-0.513368	-1.74032	0.0024	0.036963	yes	CG34195	down	FBgn0183057	FBgn0085224	dme:Dmel_CG34195
gene:FBgn0182076	gene:FBgn0182076	Dsim\GD10304	2R:3508647-3509561	Control	HA	OK	57.3562	34.9325	-0.715377	-2.77909	5e-05	0.00203673	yes	CG3420	down	FBgn0182076	FBgn0033100	dme:Dmel_CG3420
gene:FBgn0196524	gene:FBgn0196524	Dsim\GD25212	2R:17652803-17678712	Control	HA	OK	20.5798	10.8385	-0.925057	-2.00962	0.0004	0.010005	yes	CG34203	down	FBgn0196524	FBgn0085232	dme:Dmel_CG34203
gene:FBgn0184086	gene:FBgn0184086	Dsim\GD12354	3L:17634345-17635054	Control	HA	OK	10.7508	6.53356	-0.718508	-1.92349	0.00155	0.0274273	yes	CG34253	down	FBgn0184086	FBgn0085282	dme:Dmel_CG34253
gene:FBgn0189678	gene:FBgn0189678	Dsim\GD18136	3R:21727497-21730529	Control	HA	OK	115.714	67.169	-0.784698	-2.40388	5e-05	0.00203673	yes	CG34291	down	FBgn0189678	FBgn0085320	dme:Dmel_CG34291
gene:FBgn0270006	gene:FBgn0270006	Dsim\GD28716	3R:16392211-16392957	Control	HA	OK	11.4489	5.35532	-1.09616	-3.2613	5e-05	0.00203673	yes	CG34301	down	FBgn0270006	FBgn0085330	dme:Dmel_CG34301
gene:FBgn0187393	gene:FBgn0187393	Dsim\GD15732	X:15696788-15709435	Control	HA	OK	12.2316	7.01622	-0.801845	-2.52775	0.0001	0.0035265	yes	CG34325	down	FBgn0187393	FBgn0085354	dme:Dmel_CG34325
gene:FBgn0185241	gene:FBgn0185241	Dsim\GD13530	3L:202750-203812	Control	HA	OK	8.44013	4.96685	-0.764934	-2.28483	0.0001	0.0035265	yes	CG34453	down	FBgn0185241	FBgn0085482	dme:Dmel_CG34453
gene:FBgn0188222	gene:FBgn0188222	Dsim\GD16628	X:2626623-2627753	Control	HA	OK	40.7242	29.3352	-0.473251	-1.71319	0.00335	0.0463061	yes	CG3603	down	FBgn0188222	FBgn0029648	dme:Dmel_CG3603
gene:FBgn0195697	gene:FBgn0195697	Dsim\GD24350	2L:21403210-21410836	Control	HA	OK	6.04578	3.60338	-0.746577	-2.10429	0.0003	0.00809189	yes	CG3635	down	FBgn0195697	FBgn0032981	dme:Dmel_CG3635
gene:FBgn0194993	gene:FBgn0194993	Dsim\GD23616	2L:9272581-9274879	Control	HA	OK	1.02477	0.561808	-0.867147	-1.7756	0.003	0.0429555	yes	CG3841	down	FBgn0194993	FBgn0032131	dme:Dmel_CG3841
gene:FBgn0188225	gene:FBgn0188225	Dsim\GD16632	X:2840994-2842191	Control	HA	OK	55.8642	40.3286	-0.470122	-1.81431	0.0026	0.038961	yes	CG3939	down	FBgn0188225	FBgn0040396	dme:Dmel_CG3939
gene:FBgn0184056	gene:FBgn0184056	Dsim\GD12324	3L:18391437-18403708	Control	HA	OK	22.9363	16.5163	-0.473739	-1.81788	0.00245	0.0375015	yes	CG3961	down	FBgn0184056	FBgn0036821	dme:Dmel_CG3961
gene:FBgn0183697	gene:FBgn0183697	Dsim\GD11958	2R:785889-1181589	Control	HA	OK	91.127	52.184	-0.804272	-2.07905	0.00255	0.0385008	yes	CG40045	down	FBgn0183697	FBgn0058045	dme:Dmel_CG40045
gene:FBgn0269983	gene:FBgn0269983	Dsim\GD28693	3L:23085256-23090183	Control	HA	OK	14.5244	7.85505	-0.886784	-3.45772	5e-05	0.00203673	yes	CG41099	down	FBgn0269983	FBgn0039955	dme:Dmel_CG41099
gene:FBgn0270216	gene:FBgn0270216	Dsim\GD28926	JPYS01004985:326-2364	Control	HA	OK	19.3767	10.7297	-0.852717	-3.34766	5e-05	0.00203673	yes		down	FBgn0270216	FBgn0039955
gene:FBgn0268107	gene:FBgn0268107	Dsim\GD26817	JPYS01004463:17416-19788	Control	HA	OK	104.519	70.1936	-0.57435	-2.50506	0.00015	0.00464907	yes	CG41128	down	FBgn0268107	FBgn0069923	dme:Dmel_CG41128
gene:FBgn0190330	gene:FBgn0190330	Dsim\GD18814	3R:12922901-12926242	Control	HA	OK	5.66365	1.0273	-2.46288	-3.03999	0.0001	0.0035265	yes	CG4115	down	FBgn0190330	FBgn0038017	dme:Dmel_CG4115
gene:FBgn0192700	gene:FBgn0192700	Dsim\GD21250	3R:21229525-21243703	Control	HA	OK	15.4356	10.5969	-0.542615	-1.97031	0.0008	0.0169872	yes	CG42235	down	FBgn0192700	FBgn0250757	dme:Dmel_CG42235
gene:FBgn0195549	gene:FBgn0195549	Dsim\GD24198	X:835882-836692	Control	HA	OK	4.88416	2.8565	-0.773862	-2.60981	5e-05	0.00203673	yes	CG42259	down	FBgn0195549	FBgn0266569	dme:Dmel_CG42259
gene:FBgn0270484	gene:FBgn0270484	Dsim\GD29194	2R:18061362-18063735	Control	HA	OK	2.20867	1.27927	-0.787854	-2.5414	5e-05	0.00203673	yes	CG42363	down	FBgn0270484	FBgn0259709	dme:Dmel_CG42363
gene:FBgn0190820	gene:FBgn0190820	Dsim\GD19318	3R:5591725-5593882	Control	HA	OK	27.4859	19.9356	-0.463343	-2.58416	0.0033	0.0457417	yes	CG42395	down	FBgn0190820	FBgn0259741	dme:Dmel_CG42395
gene:FBgn0184484	gene:FBgn0184484	Dsim\GD12757	3L:11665441-11666197	Control	HA	OK	228.69	163.032	-0.488235	-1.82199	0.00195	0.0321139	yes	CG42397	down	FBgn0184484	FBgn0259748	dme:Dmel_CG42397
gene:FBgn0269771	gene:FBgn0269771	Dsim\GD28481	3L:18193297-18194088	Control	HA	OK	3.11253	1.18831	-1.38918	-3.46868	5e-05	0.00203673	yes	CG42495	down	FBgn0269771	FBgn0260027	dme:Dmel_CG42495
gene:FBgn0183428	gene:FBgn0183428	Dsim\GD11688	2R:19034890-19035664	Control	HA	OK	66.3423	40.1612	-0.724126	-2.24896	0.00015	0.00464907	yes	CG4250	down	FBgn0183428	FBgn0034761	dme:Dmel_CG4250
gene:FBgn0183426	gene:FBgn0183426	Dsim\GD11686	2R:19031699-19032651	Control	HA	OK	79.4619	57.3167	-0.471309	-1.864	0.00355	0.0481372	yes	CG42565	down	FBgn0183426	FBgn0260767	dme:Dmel_CG42565
gene:FBgn0270396	gene:FBgn0270396	Dsim\GD29106	2R:12251442-12252534	Control	HA	OK	11.4656	5.36255	-1.09631	-3.89989	5e-05	0.00203673	yes	CG42662	down	FBgn0270396	FBgn0261538	dme:Dmel_CG42662
gene:FBgn0195411	gene:FBgn0195411	Dsim\GD24053	2L:15852646-15854840	Control	HA	OK	6.95712	4.23467	-0.716241	-2.3133	0.00115	0.0221992	yes	CG4278	down	FBgn0195411	FBgn0014092	dme:Dmel_CG4278
gene:FBgn0197031	gene:FBgn0197031	Dsim\GD25749	2R:10121710-10123087	Control	HA	OK	25.5664	17.3554	-0.558864	-2.0829	0.00035	0.00897943	yes	CG42807	down	FBgn0197031	FBgn0261989	dme:Dmel_CG42807
gene:FBgn0190661	gene:FBgn0190661	Dsim\GD19156	3R:8020521-8021261	Control	HA	OK	13.2095	6.77941	-0.962345	-2.26428	0.0003	0.00809189	yes	CG42822	down	FBgn0190661	FBgn0262004	dme:Dmel_CG42822
gene:FBgn0269537	gene:FBgn0269537	Dsim\GD28247	3L:19681300-19683094	Control	HA	OK	21.3474	13.7854	-0.630923	-1.73157	0.00275	0.0404197	yes	CG42833	down	FBgn0269537	FBgn0262022	dme:Dmel_CG42833
gene:FBgn0269460	gene:FBgn0269460	Dsim\GD28170	2R:19035758-19038283	Control	HA	OK	1.30159	0.803973	-0.695057	-1.98207	0.0012	0.0226818	yes	CG42867	down	FBgn0269460	FBgn0262141	dme:Dmel_CG42867
gene:FBgn0270524	gene:FBgn0270524	Dsim\GD29234	2L:4250952-4287949	Control	HA	OK	19.2479	8.48991	-1.18088	-3.574	5e-05	0.00203673	yes	CG43055	down	FBgn0270524	FBgn0262357	dme:Dmel_CG43055
gene:FBgn0184075	gene:FBgn0184075	Dsim\GD12343	3L:18009097-18010264	Control	HA	OK	16.7619	10.2819	-0.705074	-2.32163	0.00015	0.00464907	yes	CG4306	down	FBgn0184075	FBgn0036787	dme:Dmel_CG4306
gene:FBgn0270050	gene:FBgn0270050	Dsim\GD28760	3L:14036590-14038022	Control	HA	OK	1.77775	0.610002	-1.54317	-4.05928	5e-05	0.00203673	yes	CG43120	down	FBgn0270050	FBgn0262580	dme:Dmel_CG43120
gene:FBgn0268239	gene:FBgn0268239	Dsim\GD26949	3R:841600-842165	Control	HA	OK	3.29701	1.40206	-1.23362	-1.91939	0.00275	0.0404197	yes	CG43131	down	FBgn0268239	FBgn0262605	dme:Dmel_CG43131
gene:FBgn0270521	gene:FBgn0270521	Dsim\GD29231	2R:19518729-19519349	Control	HA	OK	30.6469	11.8658	-1.36894	-3.93013	5e-05	0.00203673	yes	CG43207	down	FBgn0270521	FBgn0262843	dme:Dmel_CG43207
gene:FBgn0269410	gene:FBgn0269410	Dsim\GD28120	2R:14098757-14099508	Control	HA	OK	4.81655	2.61594	-0.880672	-2.05135	0.0008	0.0169872	yes	CG43324	down	FBgn0269410	FBgn0263029	dme:Dmel_CG43324
gene:FBgn0270313	gene:FBgn0270313	Dsim\GD29023	2R:15514101-15524807	Control	HA	OK	79.5459	41.4816	-0.939315	-2.93084	5e-05	0.00203673	yes	CG43351	down	FBgn0270313	FBgn0263083	dme:Dmel_CG43351
gene:FBgn0269292	gene:FBgn0269292	Dsim\GD28002	2L:1380149-1380857	Control	HA	OK	29.7198	14.9581	-0.990497	-3.71344	5e-05	0.00203673	yes	CG43402	down	FBgn0269292	FBgn0263321	dme:Dmel_CG43402
gene:FBgn0196025	gene:FBgn0196025	Dsim\GD24701	X:9696968-9711080	Control	HA	OK	249.217	97.0756	-1.36022	-5.02916	5e-05	0.00203673	yes	CG43740	down	FBgn0196025	FBgn0263997	dme:Dmel_CG43740
gene:FBgn0196473	gene:FBgn0196473	Dsim\GD25161	2R:18216658-18217565	Control	HA	OK	48.1451	25.8745	-0.895857	-3.0655	5e-05	0.00203673	yes	CG4377	down	FBgn0196473	FBgn0034664	dme:Dmel_CG4377
gene:FBgn0269143	gene:FBgn0269143	Dsim\GD27853	3L:17617197-17618944	Control	HA	OK	20.398	14.0211	-0.54083	-1.99716	0.00085	0.0175996	yes	CG44005	down	FBgn0269143	FBgn0264747	dme:Dmel_CG44005
gene:FBgn0191817	gene:FBgn0191817	Dsim\GD20343	3R:9894134-9895080	Control	HA	OK	58.6328	40.6795	-0.527405	-1.9334	0.00205	0.0333752	yes	CG44014	down	FBgn0191817	FBgn0264776	dme:Dmel_CG44014
gene:FBgn0269181	gene:FBgn0269181	Dsim\GD27891	2L:15229363-15262728	Control	HA	OK	7.07063	3.22059	-1.13452	-3.53758	5e-05	0.00203673	yes	CG44141	down	FBgn0269181	FBgn0264990	dme:Dmel_CG44140
gene:FBgn0197078	gene:FBgn0197078	Dsim\GD25797	2R:9513794-9518239	Control	HA	OK	280.713	188.941	-0.571161	-2.10536	0.00015	0.00464907	yes	CG44250	down	FBgn0197078	FBgn0265185	dme:Dmel_CG44250
gene:FBgn0191577	gene:FBgn0191577	Dsim\GD20097	3R:5583873-5591556	Control	HA	OK	11.2473	7.41246	-0.601551	-2.32801	0.00015	0.00464907	yes	CG4562	down	FBgn0191577	FBgn0038740	dme:Dmel_CG4562
gene:FBgn0195014	gene:FBgn0195014	Dsim\GD23637	2L:9616807-9618131	Control	HA	OK	83.6913	59.319	-0.496582	-1.92521	0.0011	0.0217386	yes	CG4598	down	FBgn0195014	FBgn0032160	dme:Dmel_CG4598
gene:FBgn0192070	gene:FBgn0192070	Dsim\GD20603	3R:13156028-13162577	Control	HA	OK	0.719127	0.0369126	-4.28406	-2.11678	0.0031	0.0440085	yes	CG4702	down	FBgn0192070	FBgn0037992	dme:Dmel_CG4702
gene:FBgn0190826	gene:FBgn0190826	Dsim\GD19324	3R:5450547-5529204	Control	HA	OK	132.941	71.6479	-0.89179	-3.59164	5e-05	0.00203673	yes	CG4783	down	FBgn0190826	FBgn0038756	dme:Dmel_CG4783
gene:FBgn0188870	gene:FBgn0188870	Dsim\GD17309	X:15784885-15787332	Control	HA	OK	16.2299	8.53696	-0.926857	-3.37191	5e-05	0.00203673	yes	CG4789	down	FBgn0188870	FBgn0030792	dme:Dmel_CG4789
gene:FBgn0194381	gene:FBgn0194381	Dsim\GD22989	2L:102312-107189	Control	HA	OK	3.87387	2.59476	-0.578175	-2.05105	0.0015	0.026828	yes	CG4822	down	FBgn0194381	FBgn0031220	dme:Dmel_CG4822
gene:FBgn0188879	gene:FBgn0188879	Dsim\GD17318	X:15870242-15871826	Control	HA	OK	7.70059	5.27687	-0.545286	-1.97807	0.0015	0.026828	yes	CG4880	down	FBgn0188879	FBgn0030803	dme:Dmel_CG4880
gene:FBgn0188885	gene:FBgn0188885	Dsim\GD17325	X:16078827-16088045	Control	HA	OK	10.7626	6.22775	-0.789249	-3.25949	5e-05	0.00203673	yes	CG4949	down	FBgn0188885	FBgn0030813	dme:Dmel_CG4949
gene:FBgn0195054	gene:FBgn0195054	Dsim\GD23677	2L:10009636-10011297	Control	HA	OK	96.8223	70.7355	-0.452905	-1.75148	0.00315	0.0443399	yes	CG5037	down	FBgn0195054	FBgn0032222	dme:Dmel_CG5037
gene:FBgn0195066	gene:FBgn0195066	Dsim\GD23689	2L:10060671-10063199	Control	HA	OK	25.7905	15.0681	-0.775342	-2.92919	5e-05	0.00203673	yes	CG5096	down	FBgn0195066	FBgn0032235	dme:Dmel_CG5096
gene:FBgn0192673	gene:FBgn0192673	Dsim\GD21222	3R:20842965-20843796	Control	HA	OK	494.275	195.434	-1.33864	-4.91337	5e-05	0.00203673	yes	CG5107	down	FBgn0192673	FBgn0039342	dme:Dmel_CG5107
gene:FBgn0186197	gene:FBgn0186197	Dsim\GD14515	3L:14616264-14617976	Control	HA	OK	26.2621	17.7648	-0.563961	-2.07908	0.00045	0.0109804	yes	CG5114	down	FBgn0186197	FBgn0036460	dme:Dmel_CG5114
gene:FBgn0193900	gene:FBgn0193900	Dsim\GD22498	2L:7137402-7141086	Control	HA	OK	17.5307	11.8919	-0.559904	-2.72141	0.00015	0.00464907	yes	CG5149	down	FBgn0193900	FBgn0031904	dme:Dmel_CG5149
gene:FBgn0194848	gene:FBgn0194848	Dsim\GD23468	2L:7154898-7157995	Control	HA	OK	70.9055	40.4366	-0.810235	-3.0752	5e-05	0.00203673	yes	CG5171	down	FBgn0194848	FBgn0031907	dme:Dmel_CG5171
gene:FBgn0183131	gene:FBgn0183131	Dsim\GD11382	2R:14933998-14938746	Control	HA	OK	114.847	73.7866	-0.638286	-2.44709	0.0001	0.0035265	yes	CG5174	down	FBgn0183131	FBgn0034345	dme:Dmel_CG5174
gene:FBgn0183145	gene:FBgn0183145	Dsim\GD11396	2R:15104852-15105673	Control	HA	OK	119.052	81.465	-0.547337	-2.09962	0.00045	0.0109804	yes	CG5323	down	FBgn0183145	FBgn0034362	dme:Dmel_CG5323
gene:FBgn0196310	gene:FBgn0196310	Dsim\GD24997	2R:20245272-20248476	Control	HA	OK	46.6956	31.1006	-0.586348	-2.21258	0.00015	0.00464907	yes	CG5339	down	FBgn0196310	FBgn0034925	dme:Dmel_CG5339
gene:FBgn0190544	gene:FBgn0190544	Dsim\GD19037	3R:9719500-9720968	Control	HA	OK	95.848	58.9884	-0.700318	-2.64576	5e-05	0.00203673	yes	CG5399	down	FBgn0190544	FBgn0038353	dme:Dmel_CG5399
gene:FBgn0188709	gene:FBgn0188709	Dsim\GD17140	X:12901403-12902734	Control	HA	OK	6.91336	4.38179	-0.657866	-2.03002	0.0009	0.0185196	yes	CG5418	down	FBgn0188709	FBgn0032436	dme:Dmel_CG5418
gene:FBgn0192749	gene:FBgn0192749	Dsim\GD21312	3R:22162647-22167140	Control	HA	OK	15.474	10.4637	-0.564451	-2.41539	0.0013	0.0239373	yes	CG5500	down	FBgn0192749	FBgn0039461	dme:Dmel_CG5500
gene:FBgn0184097	gene:FBgn0184097	Dsim\GD12365	3L:17441636-17442355	Control	HA	OK	316.692	206.436	-0.617388	-2.44473	0.0001	0.0035265	yes	CG5506	down	FBgn0184097	FBgn0036766	dme:Dmel_CG5506
gene:FBgn0193696	gene:FBgn0193696	Dsim\GD22288	2L:9932402-9933525	Control	HA	OK	106.759	60.5062	-0.8192	-3.18556	5e-05	0.00203673	yes	CG5676	down	FBgn0193696	FBgn0032200	dme:Dmel_CG5676
gene:FBgn0195487	gene:FBgn0195487	Dsim\GD24131	2L:17625904-17635763	Control	HA	OK	4.75044	3.18194	-0.578155	-2.00609	0.0008	0.0169872	yes	CG5758	down	FBgn0195487	FBgn0032666	dme:Dmel_CG5758
gene:FBgn0196719	gene:FBgn0196719	Dsim\GD25424	2R:14576595-14577626	Control	HA	OK	3.38287	1.39206	-1.28103	-2.96243	0.00025	0.00696927	yes	CG5767	down	FBgn0196719	FBgn0034292	dme:Dmel_CG5767
gene:FBgn0190900	gene:FBgn0190900	Dsim\GD19399	3R:4347339-4348659	Control	HA	OK	22.3085	14.7403	-0.597825	-2.08682	0.0005	0.0119378	yes	CG5793	down	FBgn0190900	FBgn0038858	dme:Dmel_CG5793
gene:FBgn0189806	gene:FBgn0189806	Dsim\GD18273	3R:20125231-20127942	Control	HA	OK	13.9373	9.98731	-0.480785	-2.01161	0.00225	0.0353622	yes	CG5805	down	FBgn0189806	FBgn0039223	dme:Dmel_CG5805
gene:FBgn0189801	gene:FBgn0189801	Dsim\GD18268	3R:20154549-20157343	Control	HA	OK	14.684	9.43176	-0.638644	-1.77975	0.0033	0.0457417	yes	CG5808	down	FBgn0189801	FBgn0027617	dme:Dmel_CG5808
gene:FBgn0193338	gene:FBgn0193338	Dsim\GD21922	2L:15831660-15833155	Control	HA	OK	16.082	10.36	-0.634421	-2.48747	5e-05	0.00203673	yes	CG5861	down	FBgn0193338	FBgn0015338	dme:Dmel_CG5861
gene:FBgn0188363	gene:FBgn0188363	Dsim\GD16776	X:5507770-5511661	Control	HA	OK	6.81728	4.61611	-0.562519	-2.05243	0.0008	0.0169872	yes	CG5966	down	FBgn0188363	FBgn0029831	dme:Dmel_CG5966
gene:FBgn0186562	gene:FBgn0186562	Dsim\GD14890	3L:19934808-19935594	Control	HA	OK	49.854	35.5843	-0.486466	-1.94279	0.0036	0.0486829	yes	CG5969	down	FBgn0186562	FBgn0036998	dme:Dmel_CG5969
gene:FBgn0184560	gene:FBgn0184560	Dsim\GD12835	3L:10793250-10800424	Control	HA	OK	13.3331	8.26347	-0.69019	-2.08157	0.0007	0.0154558	yes	CG6321	down	FBgn0184560	FBgn0036117	dme:Dmel_CG6321
gene:FBgn0182748	gene:FBgn0182748	Dsim\GD10988	2R:10417043-10418758	Control	HA	OK	38.4062	23.8893	-0.684979	-2.60015	5e-05	0.00203673	yes	CG6357	down	FBgn0182748	FBgn0033875	dme:Dmel_CG6357
gene:FBgn0182978	gene:FBgn0182978	Dsim\GD11226	2R:13427592-13430099	Control	HA	OK	76.4038	49.4127	-0.628764	-2.38369	0.0001	0.0035265	yes	CG6426	down	FBgn0182978	FBgn0034162	dme:Dmel_CG6426
gene:FBgn0196756	gene:FBgn0196756	Dsim\GD25462	2R:14117082-14119660	Control	HA	OK	10.8433	6.35155	-0.77162	-2.71426	5e-05	0.00203673	yes	CG6484	down	FBgn0196756	FBgn0034247	dme:Dmel_CG6484
gene:FBgn0189679	gene:FBgn0189679	Dsim\GD18137	3R:21726906-21727378	Control	HA	OK	523.072	245.342	-1.09221	-3.92154	5e-05	0.00203673	yes	CG6503	down	FBgn0189679	FBgn0040606	dme:Dmel_CG6503
gene:FBgn0193536	gene:FBgn0193536	Dsim\GD22126	2L:11792766-11795025	Control	HA	OK	12.204	7.92278	-0.623279	-3.17757	0.0009	0.0185196	yes	CG6583	down	FBgn0193536	FBgn0032420	dme:Dmel_CG6583
gene:FBgn0184701	gene:FBgn0184701	Dsim\GD12977	3L:8357200-8358838	Control	HA	OK	72.9808	52.1263	-0.485506	-1.88003	0.00105	0.021	yes	CG6638	down	FBgn0184701	FBgn0035911	dme:Dmel_CG6638
gene:FBgn0195693	gene:FBgn0195693	Dsim\GD24346	2L:21335226-21337000	Control	HA	OK	1.64258	0.806842	-1.02561	-1.96703	0.00055	0.0129458	yes	CG6675	down	FBgn0195693	FBgn0032973	dme:Dmel_CG6675
gene:FBgn0184605	gene:FBgn0184605	Dsim\GD12880	3L:9711069-9712189	Control	HA	OK	12.0937	7.38755	-0.711088	-1.97803	0.0007	0.0154558	yes	CG6685	down	FBgn0184605	FBgn0036062	dme:Dmel_CG6685
gene:FBgn0192111	gene:FBgn0192111	Dsim\GD20645	3R:13589871-13594465	Control	HA	OK	9.3083	4.60375	-1.01571	-2.00112	0.00065	0.0146433	yes	CG6830	down	FBgn0192111	FBgn0037934	dme:Dmel_CG6830
gene:FBgn0192110	gene:FBgn0192110	Dsim\GD20644	3R:13586097-13589484	Control	HA	OK	16.3001	11.042	-0.56188	-2.04194	0.0009	0.0185196	yes		down	FBgn0192110	FBgn0037934
gene:FBgn0186454	gene:FBgn0186454	Dsim\GD14781	3L:18415021-18416372	Control	HA	OK	17.4125	11.3619	-0.61592	-2.25624	0.00045	0.0109804	yes	CG6843	down	FBgn0186454	FBgn0036827	dme:Dmel_CG6843
gene:FBgn0192109	gene:FBgn0192109	Dsim\GD20643	3R:13584319-13585861	Control	HA	OK	23.087	13.9252	-0.729378	-2.67172	0.00015	0.00464907	yes	CG6908	down	FBgn0192109	FBgn0037936	dme:Dmel_CG6908
gene:FBgn0192589	gene:FBgn0192589	Dsim\GD21137	3R:20192121-20192907	Control	HA	OK	74.982	53.3934	-0.489882	-2.62966	0.0022	0.0348508	yes	CG7006	down	FBgn0192589	FBgn0039233	dme:Dmel_CG7006
gene:FBgn0193883	gene:FBgn0193883	Dsim\GD22481	2L:7442879-7444467	Control	HA	OK	12.8037	6.58344	-0.95965	-2.86156	5e-05	0.00203673	yes	CG7025	down	FBgn0193883	FBgn0031930	dme:Dmel_CG7025
gene:FBgn0183184	gene:FBgn0183184	Dsim\GD11435	2R:15722105-15723441	Control	HA	OK	27.5839	19.8984	-0.471173	-1.72024	0.00365	0.049093	yes	CG7137	down	FBgn0183184	FBgn0034422	dme:Dmel_CG7137
gene:FBgn0187277	gene:FBgn0187277	Dsim\GD15612	X:17659687-17663363	Control	HA	OK	1.74977	1.15709	-0.596664	-1.77635	0.00295	0.0423612	yes	CG7326	down	FBgn0187277	FBgn0030970	dme:Dmel_CG7326
gene:FBgn0189227	gene:FBgn0189227	Dsim\GD17678	3R:24918824-24920352	Control	HA	OK	21.1846	14.5691	-0.540101	-1.93991	0.00085	0.0175996	yes	CG7601	down	FBgn0189227	FBgn0027583	dme:Dmel_CG7601
gene:FBgn0195375	gene:FBgn0195375	Dsim\GD24016	2L:15213288-15214173	Control	HA	OK	13.0426	5.10961	-1.35194	-3.23246	5e-05	0.00203673	yes	CG7631	down	FBgn0195375	FBgn0028945	dme:Dmel_CG7631
gene:FBgn0182161	gene:FBgn0182161	Dsim\GD10389	2R:2796944-2798973	Control	HA	OK	22.5686	13.3639	-0.755982	-3.49511	5e-05	0.00203673	yes	CG7882	down	FBgn0182161	FBgn0033047	dme:Dmel_CG7882
gene:FBgn0045589	gene:FBgn0045589	Dsim\GD25632	2R:11772735-11774293	Control	HA	OK	28.2979	17.1524	-0.722285	-2.58009	5e-05	0.00203673	yes	CG8093	down	FBgn0045589	FBgn0033999	dme:Dmel_CG8093
gene:FBgn0196910	gene:FBgn0196910	Dsim\GD25624	2R:11867170-11868369	Control	HA	OK	11.083	7.23017	-0.616247	-1.95912	0.00195	0.0321139	yes	CG8152	down	FBgn0196910	FBgn0034008	dme:Dmel_CG8152
gene:FBgn0196870	gene:FBgn0196870	Dsim\GD25584	2R:12498271-12499164	Control	HA	OK	113.486	79.7863	-0.508298	-2.00872	0.00095	0.0191535	yes	CG8299	down	FBgn0196870	FBgn0034052	dme:Dmel_CG8299
gene:FBgn0196848	gene:FBgn0196848	Dsim\GD25562	2R:12741604-12743191	Control	HA	OK	4.635	3.05247	-0.602594	-2.36341	0.0002	0.00581924	yes	CG8441	down	FBgn0196848	FBgn0034086	dme:Dmel_CG8441
gene:FBgn0183236	gene:FBgn0183236	Dsim\GD11488	2R:16405054-16410614	Control	HA	OK	21.3248	14.645	-0.542125	-1.99373	0.00085	0.0175996	yes	CG8654	down	FBgn0183236	FBgn0034479	dme:Dmel_CG8654
gene:FBgn0187343	gene:FBgn0187343	Dsim\GD15681	X:16279950-16280712	Control	HA	OK	227.391	126.996	-0.840389	-3.29922	5e-05	0.00203673	yes	CG8661	down	FBgn0187343	FBgn0030837	dme:Dmel_CG8661
gene:FBgn0183992	gene:FBgn0183992	Dsim\GD12257	3L:19226529-19229221	Control	HA	OK	21.5197	15.011	-0.519637	-1.95918	0.00135	0.0245858	yes	CG8765	down	FBgn0183992	FBgn0036900	dme:Dmel_CG8765
gene:FBgn0197104	gene:FBgn0197104	Dsim\GD25824	2R:9247710-9248913	Control	HA	OK	34.1773	24.0205	-0.508772	-1.81928	0.00135	0.0245858	yes	CG8778	down	FBgn0197104	FBgn0033761	dme:Dmel_CG8778
gene:FBgn0197123	gene:FBgn0197123	Dsim\GD25843	2R:9019535-9021616	Control	HA	OK	149.12	105.607	-0.497768	-1.97661	0.00115	0.0221992	yes	CG8834	down	FBgn0197123	FBgn0033733	dme:Dmel_CG8834
gene:FBgn0194029	gene:FBgn0194029	Dsim\GD22631	2L:5571649-5604408	Control	HA	OK	2.00576	1.35316	-0.567817	-2.0459	0.00075	0.0163072	yes	CG9171	down	FBgn0194029	FBgn0031738	dme:Dmel_CG9171
gene:FBgn0190443	gene:FBgn0190443	Dsim\GD18932	3R:11570915-11572049	Control	HA	OK	110.919	80.7834	-0.457373	-1.8734	0.00285	0.0415833	yes	CG9286	down	FBgn0190443	FBgn0038183	dme:Dmel_CG9286
gene:FBgn0183292	gene:FBgn0183292	Dsim\GD11551	2R:17376944-17378715	Control	HA	OK	40.3899	25.4171	-0.668194	-2.45406	5e-05	0.00203673	yes	CG9344	down	FBgn0183292	FBgn0034564	dme:Dmel_CG9344
gene:FBgn0191474	gene:FBgn0191474	Dsim\GD19991	3R:4205578-4206591	Control	HA	OK	150.719	105.909	-0.509038	-1.82356	0.00185	0.0311349	yes	CG9360	down	FBgn0191474	FBgn0030332	dme:Dmel_CG9360
gene:FBgn0196208	gene:FBgn0196208	Dsim\GD24892	2R:21472681-21477857	Control	HA	OK	12.738	7.70932	-0.724458	-2.65882	5e-05	0.00203673	yes	CG9380	down	FBgn0196208	FBgn0035094	dme:Dmel_CG9380
gene:FBgn0183869	gene:FBgn0183869	Dsim\GD12132	3L:20701096-20702738	Control	HA	OK	77.6938	53.6258	-0.534873	-2.18772	0.00065	0.0146433	yes	CG9391	down	FBgn0183869	FBgn0037063	dme:Dmel_CG9391
gene:FBgn0192249	gene:FBgn0192249	Dsim\GD20785	3R:15637220-15639307	Control	HA	OK	16.1107	11.6092	-0.472744	-2.48441	0.00305	0.0435465	yes	CG9393	down	FBgn0192249	FBgn0037710	dme:Dmel_CG9393
gene:FBgn0193989	gene:FBgn0193989	Dsim\GD22588	2L:6141774-6143686	Control	HA	OK	8.07879	4.60359	-0.811379	-2.31946	0.0002	0.00581924	yes	CG9497	down	FBgn0193989	FBgn0031800	dme:Dmel_CG9497
gene:FBgn0193979	gene:FBgn0193979	Dsim\GD22578	2L:6219290-6222814	Control	HA	OK	61.4673	42.5508	-0.530632	-2.03553	0.00055	0.0129458	yes	CG9527	down	FBgn0193979	FBgn0031813	dme:Dmel_CG9527
gene:FBgn0194960	gene:FBgn0194960	Dsim\GD23582	2L:8708852-8709591	Control	HA	OK	20.5541	11.7822	-0.802817	-2.63925	5e-05	0.00203673	yes	CG9568	down	FBgn0194960	FBgn0032087	dme:Dmel_CG9568
gene:FBgn0194160	gene:FBgn0194160	Dsim\GD22766	2L:3154546-3162952	Control	HA	OK	6.39299	4.39863	-0.539436	-1.85653	0.00195	0.0321139	yes	CG9663	down	FBgn0194160	FBgn0031516	dme:Dmel_CG9663
gene:FBgn0192937	gene:FBgn0192937	Dsim\GD21511	3R:25420348-25422547	Control	HA	OK	3.13961	1.63592	-0.940485	-2.7331	5e-05	0.00203673	yes	CG9682	down	FBgn0192937	FBgn0039760	dme:Dmel_CG9682
gene:FBgn0183956	gene:FBgn0183956	Dsim\GD12220	X:9298215-9299000	Control	HA	OK	10.8751	6.94998	-0.645943	-2.15458	0.00185	0.0311349	yes	CG9686	down	FBgn0183956	FBgn0030158	dme:Dmel_CG9686
gene:FBgn0183454	gene:FBgn0183454	Dsim\GD11714	2R:19212444-19214613	Control	HA	OK	4.12542	1.8978	-1.12021	-3.09316	5e-05	0.00203673	yes	CG9826	down	FBgn0183454	FBgn0034784	dme:Dmel_CG9826
gene:FBgn0191173	gene:FBgn0191173	Dsim\GD19682	3R:186749-194494	Control	HA	OK	5.17632	3.21311	-0.687959	-2.22359	0.0021	0.0337488	yes	CG9855	down	FBgn0191173	FBgn0037242	dme:Dmel_CG9855
gene:FBgn0187405	gene:FBgn0187405	Dsim\GD15744	X:15523524-15525199	Control	HA	OK	3.23625	1.59597	-1.01989	-2.15765	0.0004	0.010005	yes	CG9903	down	FBgn0187405	FBgn0030756	dme:Dmel_CG9903
gene:FBgn0191933	gene:FBgn0191933	Dsim\GD20462	3R:11322850-11324245	Control	HA	OK	27.4537	18.0937	-0.601512	-2.34055	0.0001	0.0035265	yes	CG9922	down	FBgn0191933	FBgn0038196	dme:Dmel_CG9922
gene:FBgn0193501	gene:FBgn0193501	Dsim\GD22088	2L:12723975-12724418	Control	HA	OK	172.29	122.572	-0.491213	-1.82769	0.0019	0.0316561	yes	CG9928	down	FBgn0193501	FBgn0032472	dme:Dmel_CG9928
gene:FBgn0044191	gene:FBgn0044191	Dsim\cid	2R:10036479-10037870	Control	HA	OK	5.66154	3.9405	-0.522815	-2.56747	0.0012	0.0226818	yes	cid	down	FBgn0044191	FBgn0040477	dme:Dmel_CG13329
gene:FBgn0196118	gene:FBgn0196118	Dsim\GD24797	X:11892253-11896178	Control	HA	OK	72.4015	45.5845	-0.667477	-2.37882	0.00015	0.00464907	yes	CkIalpha	down	FBgn0196118	FBgn0015024	dme:Dmel_CG2028
gene:FBgn0046914	gene:FBgn0046914	Dsim\CkIIalpha	3L:22434201-22438298	Control	HA	OK	152.103	78.6245	-0.951997	-3.46773	5e-05	0.00203673	yes	CkIIalpha	down	FBgn0046914	FBgn0264492	dme:Dmel_CG17520
gene:FBgn0193337	gene:FBgn0193337	Dsim\GD21921	2L:15835462-15836600	Control	HA	OK	80.0807	47.8889	-0.741763	-3.3933	5e-05	0.00203673	yes	cni	down	FBgn0193337	FBgn0000339	dme:Dmel_CG5855
gene:FBgn0184038	gene:FBgn0184038	Dsim\GD12304	3L:18651773-18655009	Control	HA	OK	15.1615	9.35601	-0.696446	-2.17509	0.00035	0.00897943	yes	CNPYb	down	FBgn0184038	FBgn0036847	dme:Dmel_CG11577
gene:FBgn0270302	gene:FBgn0270302	Dsim\GD29012	X:20824857-20826641	Control	HA	OK	31.2405	21.6116	-0.531612	-2.10067	0.0006	0.0138291	yes	Coa7	down	FBgn0270302	FBgn0039965	dme:Dmel_CG13865
gene:FBgn0194426	gene:FBgn0194426	Dsim\GD23035	2L:548069-550538	Control	HA	OK	9.78606	5.25751	-0.896348	-3.91819	5e-05	0.00203673	yes	cold	down	FBgn0194426	FBgn0031268	dme:Dmel_CG2813
gene:FBgn0188680	gene:FBgn0188680	Dsim\GD17110	X:12485420-12488681	Control	HA	OK	16.3755	10.745	-0.607874	-2.62519	0.00015	0.00464907	yes	comt	down	FBgn0188680	FBgn0000346	dme:Dmel_CG1618
gene:FBgn0183683	gene:FBgn0183683	Dsim\GD11944	2R:1660922-1679170	Control	HA	OK	31.2516	19.6032	-0.672839	-2.66615	5e-05	0.00203673	yes	conu	down	FBgn0183683	FBgn0039994	dme:Dmel_CG17082
gene:FBgn0187562	gene:FBgn0187562	Dsim\GD15912	X:12136632-12139023	Control	HA	OK	32.7735	23.058	-0.507265	-1.98238	0.0014	0.0254036	yes	Coq8	down	FBgn0187562	FBgn0052649	dme:Dmel_CG32649
gene:FBgn0182039	gene:FBgn0182039	Dsim\GD10265	2R:4096729-4101564	Control	HA	OK	4.71975	3.33789	-0.499773	-1.93683	0.0021	0.0337488	yes	cos	down	FBgn0182039	FBgn0000352	dme:Dmel_CG1708
gene:FBgn0067177	gene:FBgn0067177	Dsim\GD23418	2L:6331258-6332749	Control	HA	OK	823.208	560.875	-0.553578	-1.88821	0.0021	0.0337488	yes	COX5B	down	FBgn0067177	FBgn0031830	dme:Dmel_CG11015
gene:FBgn0182755	gene:FBgn0182755	Dsim\GD10995	2R:10536029-10543232	Control	HA	OK	704.455	437.806	-0.686217	-2.15162	0.00035	0.00897943	yes	Cp1	down	FBgn0182755	FBgn0013770	dme:Dmel_CG6692
gene:FBgn0270692	gene:FBgn0270692	Dsim\GD29402	X:7850222-7851619	Control	HA	OK	7.75317	4.00399	-0.953349	-3.4904	5e-05	0.00203673	yes	CR15345	down	FBgn0270692	FBgn0040928
gene:FBgn0185881	gene:FBgn0185881	Dsim\GD14194	4:178591-181476	Control	HA	OK	38.9296	25.0294	-0.637245	-2.56979	5e-05	0.00203673	yes	Crk	down	FBgn0185881	FBgn0024811	dme:Dmel_CG1587
gene:FBgn0194907	gene:FBgn0194907	Dsim\GD23529	2L:8091897-8092751	Control	HA	OK	54.3118	34.9678	-0.635238	-2.35969	5e-05	0.00203673	yes	CSN8	down	FBgn0194907	FBgn0261437	dme:Dmel_CG42522
gene:FBgn0189221	gene:FBgn0189221	Dsim\GD17672	2L:23074899-23117518	Control	HA	OK	6.32043	3.52249	-0.843426	-2.37408	5e-05	0.00203673	yes	cta	down	FBgn0189221	FBgn0000384	dme:Dmel_CG17678
gene:FBgn0182287	gene:FBgn0182287	Dsim\GD10516	2R:4626608-4632278	Control	HA	OK	24.088	16.0469	-0.586016	-3.01145	0.00025	0.00696927	yes	Cul1	down	FBgn0182287	FBgn0015509	dme:Dmel_CG1877
gene:FBgn0195676	gene:FBgn0195676	Dsim\GD24329	2L:20895189-20899546	Control	HA	OK	21.8282	15.9571	-0.451995	-1.78478	0.00225	0.0353622	yes	Cul2	down	FBgn0195676	FBgn0032956	dme:Dmel_CG1512
gene:FBgn0191796	gene:FBgn0191796	Dsim\GD20322	3R:9567085-9576162	Control	HA	OK	2.50862	1.47377	-0.767377	-2.49626	0.0001	0.0035265	yes	cv-d	down	FBgn0191796	FBgn0265048	dme:Dmel_CG31150
gene:FBgn0187433	gene:FBgn0187433	Dsim\GD15773	X:14958124-14961061	Control	HA	OK	6.77337	4.41153	-0.618593	-2.59652	0.00015	0.00464907	yes	CycD	down	FBgn0187433	FBgn0010315	dme:Dmel_CG9096
gene:FBgn0193747	gene:FBgn0193747	Dsim\GD22340	2L:9430217-9432548	Control	HA	OK	7.63719	5.13132	-0.573713	-1.76241	0.00295	0.0423612	yes	Cyp4e1	down	FBgn0193747	FBgn0015034	dme:Dmel_CG2062
gene:FBgn0182346	gene:FBgn0182346	Dsim\GD10575	2R:5269199-5270935	Control	HA	OK	7.75103	4.76218	-0.702766	-1.93908	0.0014	0.0254036	yes	Cyp6a13	down	FBgn0182346	FBgn0033304	dme:Dmel_CG2397
gene:FBgn0181932	gene:FBgn0181932	Dsim\GD10157	2R:5264186-5266274	Control	HA	OK	6.10106	3.49349	-0.804391	-2.23657	0.0002	0.00581924	yes	Cyp6a14	down	FBgn0181932	FBgn0033302	dme:Dmel_CG8687
gene:FBgn0182259	gene:FBgn0182259	Dsim\GD10488	2R:4267502-4273706	Control	HA	OK	233.467	159.83	-0.546677	-1.86457	0.0013	0.0239373	yes	Cyt-b5	down	FBgn0182259	FBgn0264294	dme:Dmel_CG2140
gene:FBgn0197159	gene:FBgn0197159	Dsim\GD25880	2R:8457908-8459100	Control	HA	OK	11.5431	4.22753	-1.44914	-3.69161	5e-05	0.00203673	yes	Damm	down	FBgn0197159	FBgn0033659	dme:Dmel_CG18188
gene:FBgn0183681	gene:FBgn0183681	Dsim\GD11942	3L:23617704-23675908	Control	HA	OK	17.2746	10.5848	-0.70666	-2.70622	5e-05	0.00203673	yes	Dbp80	down	FBgn0183681	FBgn0024804	dme:Dmel_CG17023
gene:FBgn0268320	gene:FBgn0268320	Dsim\GD27030	2R:175173-233377	Control	HA	OK	12.885	8.03894	-0.680616	-2.53002	5e-05	0.00203673	yes		down	FBgn0268320	FBgn0024804
gene:FBgn0268440	gene:FBgn0268440	Dsim\GD27150	2L:22498621-22556825	Control	HA	OK	13.5228	8.33006	-0.698994	-2.61749	5e-05	0.00203673	yes		down	FBgn0268440	FBgn0024804
gene:FBgn0270710	gene:FBgn0270710	Dsim\GD29420	2L:22623068-22681272	Control	HA	OK	14.2473	8.03369	-0.826555	-3.14179	5e-05	0.00203673	yes		down	FBgn0270710	FBgn0024804
gene:FBgn0270893	gene:FBgn0270893	Dsim\GD29603	2R:1492722-1550926	Control	HA	OK	13.4556	8.26104	-0.70381	-2.63406	5e-05	0.00203673	yes		down	FBgn0270893	FBgn0024804
gene:FBgn0192077	gene:FBgn0192077	Dsim\GD20610	3R:13264838-13266894	Control	HA	OK	4.51773	3.02034	-0.580887	-1.73181	0.0034	0.0468028	yes	DCAF12	down	FBgn0192077	FBgn0037980	dme:Dmel_CG3313
gene:FBgn0191316	gene:FBgn0191316	Dsim\GD19827	3R:1538210-1540142	Control	HA	OK	8.61129	6.17575	-0.479614	-1.93619	0.0023	0.0359781	yes	dgrn	down	FBgn0191316	FBgn0037384	dme:Dmel_CG10981
gene:FBgn0188975	gene:FBgn0188975	Dsim\GD17420	X:17842356-17842842	Control	HA	OK	659.915	364.769	-0.855296	-3.16175	5e-05	0.00203673	yes	Diedel2	down	FBgn0188975	FBgn0262873	dme:Dmel_CG43228
gene:FBgn0190730	gene:FBgn0190730	Dsim\GD19225	3R:7153370-7154205	Control	HA	OK	151	111.594	-0.436292	-1.73536	0.00355	0.0481372	yes	Dlc90F	down	FBgn0190730	FBgn0024432	dme:Dmel_CG12363
gene:FBgn0269144	gene:FBgn0269144	Dsim\GD27854	3L:3216229-3219151	Control	HA	OK	4.94505	3.42598	-0.529471	-1.98739	0.0008	0.0169872	yes	Dpm2	down	FBgn0269144	FBgn0259933	dme:Dmel_CG42456
gene:FBgn0195729	gene:FBgn0195729	Dsim\GD24388	4:215639-220490	Control	HA	OK	7.55713	3.84012	-0.976689	-2.66355	5e-05	0.00203673	yes	dpr7	down	FBgn0195729	FBgn0053481	dme:Dmel_CG33481
gene:FBgn0084845	gene:FBgn0084845	Dsim\dro5	3L:3213446-3213732	Control	HA	OK	690.606	470.201	-0.554586	-2.04194	0.00315	0.0443399	yes	Drsl2	down	FBgn0084845	FBgn0052279	dme:Dmel_CG32279
gene:FBgn0085095	gene:FBgn0085095	Dsim\dro4	3L:3212177-3212561	Control	HA	OK	294.491	199.533	-0.561596	-2.1564	0.0003	0.00809189	yes	Drsl4	down	FBgn0085095	FBgn0052282	dme:Dmel_CG32282
gene:FBgn0195743	gene:FBgn0195743	Dsim\GD24405	4:990789-995669	Control	HA	OK	8.73602	5.07454	-0.783699	-3.04462	5e-05	0.00203673	yes	Dyrk3	down	FBgn0195743	FBgn0027101	dme:Dmel_CG40478
gene:FBgn0186447	gene:FBgn0186447	Dsim\GD14774	3L:18380890-18382311	Control	HA	OK	8.78474	5.26361	-0.738945	-2.20767	0.00015	0.00464907	yes	Dysb	down	FBgn0186447	FBgn0036819	dme:Dmel_CG6856
gene:FBgn0185447	gene:FBgn0185447	Dsim\GD13742	3L:3120681-3122082	Control	HA	OK	382.118	254.082	-0.588722	-2.25947	0.00015	0.00464907	yes	eIF1	down	FBgn0185447	FBgn0035423	dme:Dmel_CG17737
gene:FBgn0184436	gene:FBgn0184436	Dsim\GD12709	3L:12218866-12221523	Control	HA	OK	199.143	120.451	-0.725352	-2.82965	5e-05	0.00203673	yes	eIF2beta	down	FBgn0184436	FBgn0004926	dme:Dmel_CG4153
gene:FBgn0269724	gene:FBgn0269724	Dsim\GD28434	4:409483-417388	Control	HA	OK	2.63515	1.8828	-0.485007	-2.16611	0.00125	0.0233178	yes	Ephrin	down	FBgn0269724	FBgn0040324	dme:Dmel_CG1862
gene:FBgn0189693	gene:FBgn0189693	Dsim\GD18152	3R:21371808-21374899	Control	HA	OK	4.0878	2.82415	-0.533508	-1.96256	0.0015	0.026828	yes	Exo84	down	FBgn0189693	FBgn0266668	dme:Dmel_CG6095
gene:FBgn0184358	gene:FBgn0184358	Dsim\GD12631	3L:13760396-13763854	Control	HA	OK	8.92941	4.6622	-0.937553	-2.26776	5e-05	0.00203673	yes	Fbp1	down	FBgn0184358	FBgn0000639	dme:Dmel_CG17285
gene:FBgn0182128	gene:FBgn0182128	Dsim\GD10356	2R:2450832-2452113	Control	HA	OK	45.8168	29.7019	-0.625321	-2.40717	5e-05	0.00203673	yes	Fis1	down	FBgn0182128	FBgn0039969	dme:Dmel_CG17510
gene:FBgn0193139	gene:FBgn0193139	Dsim\GD21716	2L:19528447-19542706	Control	HA	OK	49.9397	32.0877	-0.638166	-2.04408	0.0002	0.00581924	yes	fok	down	FBgn0193139	FBgn0263773	dme:Dmel_CG43690
gene:FBgn0187886	gene:FBgn0187886	Dsim\GD16259	X:5030925-5032894	Control	HA	OK	18.3716	12.592	-0.544977	-1.83977	0.00235	0.0363612	yes	frma	down	FBgn0187886	FBgn0029769	dme:Dmel_CG3239
gene:FBgn0182318	gene:FBgn0182318	Dsim\GD10547	2R:4872372-4874524	Control	HA	OK	37.5481	27.271	-0.461375	-1.77961	0.00205	0.0333752	yes	Gasz	down	FBgn0182318	FBgn0033273	dme:Dmel_CG2183
gene:FBgn0192482	gene:FBgn0192482	Dsim\GD21027	3R:19077368-19079484	Control	HA	OK	18.503	10.794	-0.777528	-2.54562	5e-05	0.00203673	yes	Gba1a	down	FBgn0192482	FBgn0051148	dme:Dmel_CG31148
gene:FBgn0046913	gene:FBgn0046913	Dsim\Gel	3R:53266-62032	Control	HA	OK	71.1306	49.8129	-0.513951	-1.96835	0.001	0.0200805	yes	Gel	down	FBgn0046913	FBgn0010225	dme:Dmel_CG1106
gene:FBgn0192475	gene:FBgn0192475	Dsim\GD21020	3R:19053101-19054257	Control	HA	OK	101.668	68.2549	-0.574861	-2.19855	0.0002	0.00581924	yes	GILT3	down	FBgn0192475	FBgn0039098	dme:Dmel_CG13822
gene:FBgn0185351	gene:FBgn0185351	Dsim\GD13642	3L:1648187-1655512	Control	HA	OK	13.8793	9.15575	-0.60018	-2.35217	0.0001	0.0035265	yes	Gk2	down	FBgn0185351	FBgn0035266	dme:Dmel_CG7995
gene:FBgn0191792	gene:FBgn0191792	Dsim\GD20318	3R:9518444-9524054	Control	HA	OK	96.627	59.8878	-0.690164	-2.59192	5e-05	0.00203673	yes	glob1	down	FBgn0191792	FBgn0027657	dme:Dmel_CG9734
gene:FBgn0190812	gene:FBgn0190812	Dsim\GD19310	3R:5683498-5718245	Control	HA	OK	1.0162	0.700112	-0.537525	-1.74135	0.00245	0.0375015	yes	GluClalpha	down	FBgn0190812	FBgn0024963	dme:Dmel_CG7535
gene:FBgn0193850	gene:FBgn0193850	Dsim\GD22447	2L:7746866-7748017	Control	HA	OK	4.91007	3.07821	-0.673653	-1.75936	0.0031	0.0440085	yes	Glyat	down	FBgn0193850	FBgn0054010	dme:Dmel_CG34010
gene:FBgn0188777	gene:FBgn0188777	Dsim\GD17214	X:14534042-14558497	Control	HA	OK	14.5273	10.5405	-0.462821	-2.06748	0.0019	0.0316561	yes	Gmap	down	FBgn0188777	FBgn0027287	dme:Dmel_CG33206
gene:FBgn0193339	gene:FBgn0193339	Dsim\GD21923	2L:15826060-15828789	Control	HA	OK	22.5112	14.0908	-0.675886	-2.28571	0.0001	0.0035265	yes	GMF	down	FBgn0193339	FBgn0028894	dme:Dmel_CG5869
gene:FBgn0184323	gene:FBgn0184323	Dsim\GD12596	3L:14444301-14445293	Control	HA	OK	84.1859	53.6291	-0.650563	-4.70918	0.0001	0.0035265	yes	gnu	down	FBgn0184323	FBgn0001120	dme:Dmel_CG5272
gene:FBgn0196547	gene:FBgn0196547	Dsim\GD25235	2R:17409580-17411731	Control	HA	OK	8.38904	5.74662	-0.545792	-2.0736	0.00155	0.0274273	yes	grau	down	FBgn0196547	FBgn0001133	dme:Dmel_CG33133
gene:FBgn0195426	gene:FBgn0195426	Dsim\GD24070	2L:16207496-16227683	Control	HA	OK	46.7727	29.8889	-0.646057	-2.32713	0.0002	0.00581924	yes	grp	down	FBgn0195426	FBgn0261278	dme:Dmel_CG17161
gene:FBgn0190336	gene:FBgn0190336	Dsim\GD18820	3R:12906503-12908869	Control	HA	OK	13.1961	8.33219	-0.663347	-1.80939	0.00295	0.0423612	yes	GstD4	down	FBgn0190336	FBgn0010040	dme:Dmel_CG11512
gene:FBgn0183137	gene:FBgn0183137	Dsim\GD11388	2R:15008686-15010148	Control	HA	OK	100.502	72.4445	-0.472283	-2.10835	0.0017	0.0291512	yes	GstE11	down	FBgn0183137	FBgn0034354	dme:Dmel_CG5224
gene:FBgn0188696	gene:FBgn0188696	Dsim\GD17126	X:12630631-12635098	Control	HA	OK	66.5479	43.5285	-0.612433	-2.93006	5e-05	0.00203673	yes	GstT4	down	FBgn0188696	FBgn0030484	dme:Dmel_CG1681
gene:FBgn0188270	gene:FBgn0188270	Dsim\GD16681	2R:2029324-2037667	Control	HA	OK	26.8083	15.048	-0.83311	-4.08064	5e-05	0.00203673	yes	gus	down	FBgn0188270	FBgn0026238	dme:Dmel_CG2944
gene:FBgn0193470	gene:FBgn0193470	Dsim\GD22057	2L:12990291-13066852	Control	HA	OK	18.9429	12.6009	-0.588131	-1.88449	0.00345	0.0471658	yes	Hacd2	down	FBgn0193470	FBgn0032524	dme:Dmel_CG9267
gene:FBgn0269654	gene:FBgn0269654	Dsim\GD28364	2R:2821765-2902903	Control	HA	OK	18.9781	11.9936	-0.662072	-1.80854	0.00195	0.0321139	yes	Haspin	down	FBgn0269654	FBgn0046706	dme:Dmel_CG40080
gene:FBgn0268416	gene:FBgn0268416	Dsim\GD27126	2R:6493409-6496420	Control	HA	OK	26.8189	19.2667	-0.477142	-2.20699	0.0016	0.0278674	yes	hebe	down	FBgn0268416	FBgn0033448	dme:Dmel_CG1623
gene:FBgn0184301	gene:FBgn0184301	Dsim\GD12574	JPYS01006231:16-489	Control	HA	OK	40.9276	27.119	-0.593772	-2.19231	0.00035	0.00897943	yes	His4:CG33889	down	FBgn0184301	FBgn0053889	dme:Dmel_CG33879
gene:FBgn0183362	gene:FBgn0183362	Dsim\GD11622	2R:18110884-18113852	Control	HA	OK	413.149	283.431	-0.543665	-1.77916	0.0027	0.03992	yes	HmgD	down	FBgn0183362	FBgn0004362	dme:Dmel_CG17950
gene:FBgn0264925	gene:FBgn0264925	Dsim\HP1B	X:8511505-8512624	Control	HA	OK	69.4546	50.1636	-0.469427	-1.86842	0.00345	0.0471658	yes	HP1b	down	FBgn0264925	FBgn0030082	dme:Dmel_CG7041
gene:FBgn0186287	gene:FBgn0186287	Dsim\GD14607	3L:15840720-15841765	Control	HA	OK	4.43306	2.49609	-0.828633	-2.39747	0.00015	0.00464907	yes	Hsc20	down	FBgn0186287	FBgn0263606	dme:Dmel_CG34246
gene:FBgn0183118	gene:FBgn0183118	Dsim\GD11369	2R:14903540-14905196	Control	HA	OK	26.6654	17.9568	-0.570438	-1.91922	0.0008	0.0169872	yes	Idgf5	down	FBgn0183118	FBgn0064237	dme:Dmel_CG5154
gene:FBgn0194761	gene:FBgn0194761	Dsim\GD23376	2L:5781916-5784435	Control	HA	OK	25.9668	18.0837	-0.521979	-2.00813	0.00125	0.0233178	yes	ifc	down	FBgn0194761	FBgn0001941	dme:Dmel_CG9078
gene:FBgn0067497	gene:FBgn0067497	Dsim\ird5	3R:9375469-9378699	Control	HA	OK	9.48519	6.58938	-0.525533	-2.00487	0.0016	0.0278674	yes	IKKbeta	down	FBgn0067497	FBgn0024222	dme:Dmel_CG4201
gene:FBgn0194131	gene:FBgn0194131	Dsim\GD22734	2L:3549466-3551137	Control	HA	OK	349.469	224.486	-0.638538	-2.98877	5e-05	0.00203673	yes	IM33	down	FBgn0194131	FBgn0031561	dme:Dmel_CG16712
gene:FBgn0185043	gene:FBgn0185043	Dsim\GD13325	3L:3407460-3408970	Control	HA	OK	2.60975	0.196764	-3.72938	-3.08261	0.00095	0.0191535	yes	ImpE2	down	FBgn0185043	FBgn0001254	dme:Dmel_CG1934
gene:FBgn0268904	gene:FBgn0268904	Dsim\GD27614	2R:510175-517978	Control	HA	OK	10.4557	7.68259	-0.444631	-1.75107	0.00295	0.0423612	yes	IntS3	down	FBgn0268904	FBgn0262117	dme:Dmel_CG17665
gene:FBgn0195978	gene:FBgn0195978	Dsim\GD24651	X:9603244-9605080	Control	HA	OK	0.793436	0.184208	-2.10678	-2.30585	0.0016	0.0278674	yes	Ipod	down	FBgn0195978	FBgn0030187	dme:Dmel_CG2961
gene:FBgn0182915	gene:FBgn0182915	Dsim\GD11160	2R:12674553-12676620	Control	HA	OK	3.42941	1.94908	-0.815163	-2.07412	0.0008	0.0169872	yes	Jhedup	down	FBgn0182915	FBgn0034076	dme:Dmel_CG8424
gene:FBgn0189110	gene:FBgn0189110	Dsim\GD17560	3R:25096449-25097514	Control	HA	OK	100.411	64.6788	-0.634554	-2.31679	0.0001	0.0035265	yes	Jon99Ci	down	FBgn0189110	FBgn0003358	dme:Dmel_CG31039
gene:FBgn0189104	gene:FBgn0189104	Dsim\GD17554	3R:25097653-25098616	Control	HA	OK	5.69322	2.7547	-1.04735	-2.01098	0.00075	0.0163072	yes		down	FBgn0189104	FBgn0003358
gene:FBgn0082722	gene:FBgn0082722	Dsim\m1	3R:21337230-21338006	Control	HA	OK	96.455	63.2345	-0.609145	-2.31129	0.0003	0.00809189	yes	Kaz-m1	down	FBgn0082722	FBgn0002578	dme:Dmel_CG8342
gene:FBgn0195759	gene:FBgn0195759	Dsim\GD24423	4:953186-961438	Control	HA	OK	1.07465	0.607357	-0.823243	-2.27063	0.0001	0.0035265	yes	Kif3C	down	FBgn0195759	FBgn0039925	dme:Dmel_CG17461
gene:FBgn0194442	gene:FBgn0194442	Dsim\GD23051	2L:815400-817177	Control	HA	OK	83.8549	60.3011	-0.475711	-1.79867	0.00255	0.0385008	yes	kraken	down	FBgn0194442	FBgn0020545	dme:Dmel_CG3943
gene:FBgn0187824	gene:FBgn0187824	Dsim\GD16195	3R:27135375-27138811	Control	HA	OK	24.2272	17.6104	-0.460204	-1.95314	0.0018	0.0307077	yes	krz	down	FBgn0187824	FBgn0040206	dme:Dmel_CG1487
gene:FBgn0195594	gene:FBgn0195594	Dsim\GD24246	2L:19550520-19555722	Control	HA	OK	6.03974	3.66954	-0.718887	-1.91516	0.00125	0.0233178	yes	Kua	down	FBgn0195594	FBgn0032850	dme:Dmel_CG10723
gene:FBgn0187640	gene:FBgn0187640	Dsim\GD15995	X:10631761-10632740	Control	HA	OK	26.9455	19.1078	-0.495881	-2.49713	0.0012	0.0226818	yes	l(1)10Bb	down	FBgn0187640	FBgn0001491	dme:Dmel_CG1639
gene:FBgn0268900	gene:FBgn0268900	Dsim\GD27610	JPYS01003014:6872-9559	Control	HA	OK	1.40766	0.75754	-0.893908	-1.77991	0.00285	0.0415833	yes	l(2)41Ab	down	FBgn0268900	FBgn0262123	dme:Dmel_CG41265
gene:FBgn0193684	gene:FBgn0193684	Dsim\GD22276	2L:9989209-9990291	Control	HA	OK	16.8796	10.1948	-0.727454	-3.0171	5e-05	0.00203673	yes	l(2)SH0834	down	FBgn0193684	FBgn0267365	dme:Dmel_CG5385
gene:FBgn0269484	gene:FBgn0269484	Dsim\GD28194	2L:22386257-22398753	Control	HA	OK	6.31165	4.18422	-0.593058	-2.26046	0.0001	0.0035265	yes	l(3)80Fj	down	FBgn0269484	FBgn0287182	dme:Dmel_CG17514
gene:FBgn0268600	gene:FBgn0268600	Dsim\GD27310	2L:20821128-20827916	Control	HA	OK	20.5808	14.6839	-0.487065	-2.23382	0.0016	0.0278674	yes	Lamp1	down	FBgn0268600	FBgn0032949	dme:Dmel_CG3305
gene:FBgn0195671	gene:FBgn0195671	Dsim\GD24324	2R:1269842-1276630	Control	HA	OK	20.4498	14.4266	-0.503348	-2.29798	0.00195	0.0321139	yes		down	FBgn0195671	FBgn0032949
gene:FBgn0191402	gene:FBgn0191402	Dsim\GD19919	3R:2935583-2948301	Control	HA	OK	10.1834	5.9172	-0.783233	-3.01282	5e-05	0.00203673	yes	lap	down	FBgn0191402	FBgn0086372	dme:Dmel_CG2520
gene:FBgn0183316	gene:FBgn0183316	Dsim\GD11575	2R:17591357-17597105	Control	HA	OK	3.74219	2.26106	-0.726887	-2.371	0.0004	0.010005	yes	Lapsyn	down	FBgn0183316	FBgn0034602	dme:Dmel_CG15658
gene:FBgn0269648	gene:FBgn0269648	Dsim\GD28358	2L:10212889-10215270	Control	HA	OK	40.8029	17.1494	-1.25052	-5.30453	5e-05	0.00203673	yes	Lip4	down	FBgn0269648	FBgn0032264	dme:Dmel_CG6113
gene:FBgn0193786	gene:FBgn0193786	Dsim\GD22380	2L:8478945-8482262	Control	HA	OK	2.71032	1.38181	-0.971904	-1.89487	0.00145	0.0260739	yes	LManVI	down	FBgn0193786	FBgn0032069	dme:Dmel_CG9468
gene:FBgn0193785	gene:FBgn0193785	Dsim\GD22379	2L:8483603-8488341	Control	HA	OK	6.25804	3.67121	-0.769457	-1.74966	0.0023	0.0359781	yes		down	FBgn0193785	FBgn0032069
gene:FBgn0185631	gene:FBgn0185631	Dsim\GD13935	3L:5997564-5999210	Control	HA	OK	58.9447	33.7634	-0.803902	-3.18471	5e-05	0.00203673	yes	loj	down	FBgn0185631	FBgn0061492	dme:Dmel_CG10733
gene:FBgn0195589	gene:FBgn0195589	Dsim\GD24241	2L:19514285-19518536	Control	HA	OK	29.3488	19.1241	-0.617914	-2.18012	0.00065	0.0146433	yes	lok	down	FBgn0195589	FBgn0019686	dme:Dmel_CG10895
gene:FBgn0193669	gene:FBgn0193669	Dsim\GD22261	2L:10083247-10084118	Control	HA	OK	5.29746	1.93874	-1.45018	-4.68491	5e-05	0.00203673	yes	LSm-4	down	FBgn0193669	FBgn0067622	dme:Dmel_CG33677
gene:FBgn0185204	gene:FBgn0185204	Dsim\GD13493	3L:1124900-1125688	Control	HA	OK	21.224	9.01813	-1.2348	-3.70167	5e-05	0.00203673	yes	LysX	down	FBgn0185204	FBgn0004431	dme:Dmel_CG9120
gene:FBgn0194168	gene:FBgn0194168	Dsim\GD22774	2L:3020245-3034709	Control	HA	OK	6.54972	4.47036	-0.551041	-2.23813	0.00015	0.00464907	yes	Mad	down	FBgn0194168	FBgn0011648	dme:Dmel_CG12399
gene:FBgn0270707	gene:FBgn0270707	Dsim\GD29417	3L:23753781-23756570	Control	HA	OK	48.1844	24.3661	-0.98369	-3.8525	5e-05	0.00203673	yes	Maf1	down	FBgn0270707	FBgn0267861	dme:Dmel_CG40196
gene:FBgn0186560	gene:FBgn0186560	Dsim\GD14888	3L:19913628-19925356	Control	HA	OK	257.01	180.945	-0.506278	-1.81131	0.0012	0.0226818	yes	mag	down	FBgn0186560	FBgn0036996	dme:Dmel_CG5932
gene:FBgn0182336	gene:FBgn0182336	Dsim\GD10565	2R:5161060-5163160	Control	HA	OK	41.6262	28.2245	-0.560543	-1.97064	0.0017	0.0291512	yes	Mal-A4	down	FBgn0182336	FBgn0033294	dme:Dmel_CG8693
gene:FBgn0182340	gene:FBgn0182340	Dsim\Mal-A6	2R:5166236-5168267	Control	HA	OK	46.3477	28.5125	-0.700903	-2.53905	0.0001	0.0035265	yes	Mal-A6	down	FBgn0182340	FBgn0050360	dme:Dmel_CG30360
gene:FBgn0181941	gene:FBgn0181941	Dsim\GD10166	2R:5170458-5172720	Control	HA	OK	16.2035	7.5071	-1.10998	-3.35636	5e-05	0.00203673	yes	Mal-A7	down	FBgn0181941	FBgn0033296	dme:Dmel_CG11669
gene:FBgn0182341	gene:FBgn0182341	Dsim\Mal-A8	2R:5173009-5258698	Control	HA	OK	16.7863	8.98076	-0.902373	-1.96253	0.00115	0.0221992	yes	Mal-A8	down	FBgn0182341	FBgn0033297	dme:Dmel_CG8690
gene:FBgn0190600	gene:FBgn0190600	Dsim\GD19093	3R:9067666-9075284	Control	HA	OK	38.2813	21.608	-0.825075	-2.9689	5e-05	0.00203673	yes	Manf	down	FBgn0190600	FBgn0027095	dme:Dmel_CG7013
gene:FBgn0187141	gene:FBgn0187141	Dsim\GD15474	4:453199-456269	Control	HA	OK	8.33856	5.64578	-0.562627	-2.29312	0.00025	0.00696927	yes	mav	down	FBgn0187141	FBgn0039914	dme:Dmel_CG1901
gene:FBgn0186325	gene:FBgn0186325	Dsim\GD14645	3L:16176671-16178611	Control	HA	OK	23.957	17.3919	-0.46203	-1.81988	0.00225	0.0353622	yes	mbf1	down	FBgn0186325	FBgn0262732	dme:Dmel_CG4143
gene:FBgn0195656	gene:FBgn0195656	Dsim\GD24309	2L:20574741-20577530	Control	HA	OK	12.8956	9.43772	-0.450363	-2.62419	0.00295	0.0423612	yes	Mcm10	down	FBgn0195656	FBgn0032929	dme:Dmel_CG9241
gene:FBgn0188365	gene:FBgn0188365	Dsim\GD16778	X:5556227-5557628	Control	HA	OK	88.767	57.9719	-0.61467	-2.85987	5e-05	0.00203673	yes	MCTS1	down	FBgn0188365	FBgn0029833	dme:Dmel_CG5941
gene:FBgn0182793	gene:FBgn0182793	Dsim\GD11033	2R:10837326-10842977	Control	HA	OK	6.50824	4.31306	-0.593554	-1.93503	0.00125	0.0233178	yes	Mdr50	down	FBgn0182793	FBgn0010241	dme:Dmel_CG8523
gene:FBgn0269910	gene:FBgn0269910	Dsim\GD28620	2R:1195663-1196604	Control	HA	OK	7.74786	5.04152	-0.61994	-2.56092	0.00035	0.00897943	yes	MED21	down	FBgn0269910	FBgn0040020	dme:Dmel_CG17397
gene:FBgn0183693	gene:FBgn0183693	Dsim\GD11954	2L:22254362-22255231	Control	HA	OK	8.74823	5.74062	-0.607784	-2.39502	0.00115	0.0221992	yes		down	FBgn0183693	FBgn0040020
gene:FBgn0189393	gene:FBgn0189393	Dsim\GD17845	4:616216-622985	Control	HA	OK	25.2611	14.0724	-0.844045	-3.05966	5e-05	0.00203673	yes	MED26	down	FBgn0189393	FBgn0039923	dme:Dmel_CG1793
gene:FBgn0192172	gene:FBgn0192172	Dsim\GD20706	3R:14487728-14488689	Control	HA	OK	30.7812	19.0886	-0.689341	-2.43427	0.0001	0.0035265	yes	MED7	down	FBgn0192172	FBgn0051390	dme:Dmel_CG31390
gene:FBgn0041663	gene:FBgn0041663	Dsim\mei-218	X:16134467-16141776	Control	HA	OK	1.89331	1.28205	-0.562458	-1.98276	0.0013	0.0239373	yes	mei-218	down	FBgn0041663	FBgn0002709	dme:Dmel_CG8923
gene:FBgn0194899	gene:FBgn0194899	Dsim\GD23521	2L:8035875-8038746	Control	HA	OK	6.64172	4.27501	-0.63563	-2.55545	0.0013	0.0239373	yes	Mettl14	down	FBgn0194899	FBgn0032016	dme:Dmel_CG7818
gene:FBgn0184286	gene:FBgn0184286	Dsim\GD12559	3L:15144059-15146187	Control	HA	OK	24.9287	10.1337	-1.29865	-4.3041	5e-05	0.00203673	yes	mex1	down	FBgn0184286	FBgn0004228	dme:Dmel_CG7936
gene:FBgn0183450	gene:FBgn0183450	Dsim\GD11710	2R:19201129-19203391	Control	HA	OK	8.53772	4.48114	-0.929984	-2.75967	5e-05	0.00203673	yes	MFS1	down	FBgn0183450	FBgn0050272	dme:Dmel_CG30272
gene:FBgn0182288	gene:FBgn0182288	Dsim\GD10517	2R:4637211-4641611	Control	HA	OK	5.23858	2.70739	-0.952274	-2.15348	0.0002	0.00581924	yes	MFS12	down	FBgn0182288	FBgn0033234	dme:Dmel_CG8791
gene:FBgn0196654	gene:FBgn0196654	Dsim\GD25357	2R:15288007-15293398	Control	HA	OK	12.5705	6.58668	-0.932424	-3.53661	5e-05	0.00203673	yes	MFS14	down	FBgn0196654	FBgn0010651	dme:Dmel_CG15095
gene:FBgn0269784	gene:FBgn0269784	Dsim\GD28494	JPYS01002408:3675-5221	Control	HA	OK	7.06383	3.72429	-0.923484	-3.71003	5e-05	0.00203673	yes	MFS17	down	FBgn0269784	FBgn0058263	dme:Dmel_CG40263
gene:FBgn0184191	gene:FBgn0184191	Dsim\GD12462	3L:16166302-16175071	Control	HA	OK	29.0801	20.7724	-0.485366	-1.8935	0.00215	0.0343312	yes	Mipp1	down	FBgn0184191	FBgn0026061	dme:Dmel_CG4123
gene:FBgn0184823	gene:FBgn0184823	Dsim\GD13101	3L:6822975-6823970	Control	HA	OK	4.81088	3.14919	-0.61132	-2.94538	0.00235	0.0363612	yes	Mis12	down	FBgn0184823	FBgn0035725	dme:Dmel_CG18156
gene:FBgn0195721	gene:FBgn0195721	Dsim\GD24380	4:981684-987723	Control	HA	OK	10.9382	6.80503	-0.684697	-2.67976	5e-05	0.00203673	yes	Mitf	down	FBgn0195721	FBgn0263112	dme:Dmel_CG43369
gene:FBgn0186759	gene:FBgn0186759	Dsim\GD15087	3R:4108433-4135223	Control	HA	OK	141.985	94.501	-0.587335	-2.01388	0.00225	0.0353622	yes	mod(mdg4)	down	FBgn0186759	FBgn0002781	dme:Dmel_CG32491
gene:FBgn0193393	gene:FBgn0193393	Dsim\GD21978	2L:14495829-14510047	Control	HA	OK	4.71892	2.98277	-0.661806	-2.46541	0.00015	0.00464907	yes	mol	down	FBgn0193393	FBgn0086711	dme:Dmel_CG4482
gene:FBgn0182765	gene:FBgn0182765	Dsim\GD11005	3L:235112-236275	Control	HA	OK	25.8375	18.8424	-0.455482	-1.81534	0.00365	0.049093	yes	mRpL17	down	FBgn0182765	FBgn0035122	dme:Dmel_CG13880
gene:FBgn0192254	gene:FBgn0192254	Dsim\GD20790	3R:15685172-15687795	Control	HA	OK	112.425	73.1837	-0.619366	-1.91983	0.00085	0.0175996	yes	mRpL47	down	FBgn0192254	FBgn0014023	dme:Dmel_CG9378
gene:FBgn0191614	gene:FBgn0191614	Dsim\GD20135	3R:6337458-6338006	Control	HA	OK	36.6926	25.1926	-0.542489	-1.95939	0.0021	0.0337488	yes	mRpL55	down	FBgn0191614	FBgn0038678	dme:Dmel_CG14283
gene:FBgn0192942	gene:FBgn0192942	Dsim\GD21516	3R:25568764-25570010	Control	HA	OK	33.0357	19.4867	-0.76154	-2.34658	0.00015	0.00464907	yes	mRpS18C	down	FBgn0192942	FBgn0039765	dme:Dmel_CG9688
gene:FBgn0268418	gene:FBgn0268418	Dsim\GD27128	3L:24131542-24146208	Control	HA	OK	156.712	109.602	-0.515841	-1.82299	0.0025	0.0379756	yes	mRpS5	down	FBgn0268418	FBgn0287187	dme:Dmel_CG40049
gene:FBgn0195067	gene:FBgn0195067	Dsim\GD23690	2L:10065180-10066069	Control	HA	OK	41.2154	25.0562	-0.718014	-2.84148	5e-05	0.00203673	yes	mRpS7	down	FBgn0195067	FBgn0032236	dme:Dmel_CG5108
gene:FBgn0195998	gene:FBgn0195998	Dsim\GD24671	X:14939039-14941475	Control	HA	OK	120.023	82.8498	-0.534743	-1.95416	0.00155	0.0274273	yes	MSBP	down	FBgn0195998	FBgn0030703	dme:Dmel_CG9066
gene:FBgn0012845	gene:FBgn0012845	Dsim\MtnA	3R:15424504-15425152	Control	HA	OK	2485.45	1248.57	-0.99323	-4.20081	5e-05	0.00203673	yes	MtnA	down	FBgn0012845	FBgn0002868	dme:Dmel_CG9470
gene:FBgn0191544	gene:FBgn0191544	Dsim\MtnB	3R:4973497-4974143	Control	HA	OK	10.4114	5.75971	-0.854093	-2.47158	0.0006	0.0138291	yes	MtnC	down	FBgn0191544	FBgn0038790	dme:Dmel_CG5097
gene:FBgn0193425	gene:FBgn0193425	Dsim\GD22012	2L:13888970-13890548	Control	HA	OK	24.4817	16.9495	-0.530458	-2.02261	0.0017	0.0291512	yes	mTTF	down	FBgn0193425	FBgn0028530	dme:Dmel_CG18124
gene:FBgn0269615	gene:FBgn0269615	Dsim\GD28325	3L:11663436-11665331	Control	HA	OK	38.8195	23.9365	-0.69757	-2.63508	5e-05	0.00203673	yes	Muc68E	down	FBgn0269615	FBgn0053265	dme:Dmel_CG33265
gene:FBgn0268891	gene:FBgn0268891	Dsim\GD27601	4:514723-519375	Control	HA	OK	6.9339	3.44575	-1.00885	-3.69491	5e-05	0.00203673	yes	myo	down	FBgn0268891	FBgn0026199	dme:Dmel_CG1838
gene:FBgn0186359	gene:FBgn0186359	Dsim\GD14681	3L:16530767-16543608	Control	HA	OK	63.5378	42.6745	-0.574241	-2.00764	0.0006	0.0138291	yes	Nc73EF	down	FBgn0186359	FBgn0010352	dme:Dmel_CG11661
gene:FBgn0186520	gene:FBgn0186520	Dsim\GD14847	3L:19476347-19482126	Control	HA	OK	35.1952	22.5631	-0.641411	-2.47354	0.0001	0.0035265	yes	Nca	down	FBgn0186520	FBgn0013303	dme:Dmel_CG7641
gene:FBgn0186741	gene:FBgn0186741	Dsim\GD15069	3L:22700772-22702585	Control	HA	OK	885.21	499.805	-0.824654	-2.75168	5e-05	0.00203673	yes	ND-MLRQ	down	FBgn0186741	FBgn0052230	dme:Dmel_CG32230
gene:FBgn0268072	gene:FBgn0268072	Dsim\GD26782	2L:21802232-21804045	Control	HA	OK	883.464	493.796	-0.839255	-2.8009	5e-05	0.00203673	yes		down	FBgn0268072	FBgn0052230
gene:FBgn0194623	gene:FBgn0194623	Dsim\GD23234	2L:3325814-3326999	Control	HA	OK	709.34	471.962	-0.587807	-2.45091	0.00035	0.00897943	yes	ND-PDSW	down	FBgn0194623	FBgn0021967	dme:Dmel_CG8844
gene:FBgn0186392	gene:FBgn0186392	Dsim\GD14716	3L:17111772-17128169	Control	HA	OK	8.93246	6.52023	-0.454135	-1.9309	0.00315	0.0443399	yes	Nedd4	down	FBgn0186392	FBgn0259174	dme:Dmel_CG42279
gene:FBgn0189353	gene:FBgn0189353	Dsim\GD17805	2L:16362506-16365070	Control	HA	OK	1.07004	0.607285	-0.817218	-1.99273	0.0006	0.0138291	yes	Nepl9	down	FBgn0189353	FBgn0032613	dme:Dmel_CG13283
gene:FBgn0195580	gene:FBgn0195580	Dsim\GD24231	2L:19199593-19200648	Control	HA	OK	6.27855	3.92424	-0.67802	-2.12103	0.00095	0.0191535	yes	Nf-YB	down	FBgn0195580	FBgn0032816	dme:Dmel_CG10447
gene:FBgn0184324	gene:FBgn0184324	Dsim\GD12597	3L:14443324-14444053	Control	HA	OK	302.179	186.528	-0.696012	-2.73909	5e-05	0.00203673	yes	NHP2	down	FBgn0184324	FBgn0029148	dme:Dmel_CG5258
gene:FBgn0195483	gene:FBgn0195483	Dsim\GD24127	2L:17587950-17589864	Control	HA	OK	17.3711	9.25558	-0.908297	-2.87755	5e-05	0.00203673	yes	ninaD	down	FBgn0195483	FBgn0002939	dme:Dmel_CG31783
gene:FBgn0270124	gene:FBgn0270124	Dsim\GD28834	2R:1571981-1593555	Control	HA	OK	8.27776	5.08873	-0.701935	-2.69771	5e-05	0.00203673	yes	Nipped-B	down	FBgn0270124	FBgn0026401	dme:Dmel_CG17704
gene:FBgn0270784	gene:FBgn0270784	Dsim\GD29494	2R:1621153-1658153	Control	HA	OK	7.91135	5.00743	-0.659855	-2.54841	5e-05	0.00203673	yes	Nipped-B	down	FBgn0270784	FBgn0026401	dme:Dmel_CG17704
gene:FBgn0192285	gene:FBgn0192285	Dsim\GD20823	3R:16136959-16145000	Control	HA	OK	19.8046	10.5456	-0.909195	-2.14201	0.0005	0.0119378	yes	Nmdmc	down	FBgn0192285	FBgn0010222	dme:Dmel_CG18466
gene:FBgn0189984	gene:FBgn0189984	Dsim\GD18461	3R:17770368-17772343	Control	HA	OK	223.369	158.389	-0.495956	-1.91407	0.00135	0.0245858	yes	Nop56	down	FBgn0189984	FBgn0038964	dme:Dmel_CG13849
gene:FBgn0189053	gene:FBgn0189053	Dsim\GD17503	X:19519262-19524396	Control	HA	OK	24.913	15.2726	-0.705954	-2.73173	5e-05	0.00203673	yes	Npc1b	down	FBgn0189053	FBgn0261675	dme:Dmel_CG12092
gene:FBgn0195284	gene:FBgn0195284	Dsim\GD23916	2L:13283797-13284647	Control	HA	OK	3.74347	0.749061	-2.32122	-5.35386	0.0016	0.0278674	yes	nur	down	FBgn0195284	FBgn0051813	dme:Dmel_CG31813
gene:FBgn0183687	gene:FBgn0183687	Dsim\nvd	3L:23245833-23326116	Control	HA	OK	2.65976	1.07911	-1.30145	-2.02376	0.0013	0.0239373	yes	nvd	down	FBgn0183687	FBgn0287185	dme:Dmel_CG40050
gene:FBgn0186879	gene:FBgn0186879	Dsim\GD15209	2R:18601868-18604273	Control	HA	OK	11.4465	7.24388	-0.660069	-2.14006	0.0004	0.010005	yes	Oatp58Db	down	FBgn0186879	FBgn0034715	dme:Dmel_CG3382
gene:FBgn0183259	gene:FBgn0183259	Dsim\Obp57a	2R:16918443-16919250	Control	HA	OK	34.7976	22.5115	-0.628323	-2.26748	0.0002	0.00581924	yes	Obp57a	down	FBgn0183259	FBgn0043535	dme:Dmel_CG30141
gene:FBgn0183258	gene:FBgn0183258	Dsim\Obp57b	2R:16917642-16918288	Control	HA	OK	20.6462	13.4747	-0.61563	-1.8542	0.0019	0.0316561	yes	Obp57a	down	FBgn0183258	FBgn0043535	dme:Dmel_CG30141
gene:FBgn0183434	gene:FBgn0183434	Dsim\Obp59a	2R:19072727-19076034	Control	HA	OK	1.16241	0.4453	-1.38427	-2.27408	0.00025	0.00696927	yes	Obp59a	down	FBgn0183434	FBgn0034766	dme:Dmel_CG13517
gene:FBgn0189234	gene:FBgn0189234	Dsim\Obp99b	3R:24899910-24900502	Control	HA	OK	221.226	148.989	-0.570311	-2.052	0.00065	0.0146433	yes	Obp99b	down	FBgn0189234	FBgn0039685	dme:Dmel_CG7592
gene:FBgn0186183	gene:FBgn0186183	Dsim\GD14501	3L:14318309-14389441	Control	HA	OK	8.10457	5.6256	-0.526728	-1.77385	0.00305	0.0435465	yes	ome	down	FBgn0186183	FBgn0259175	dme:Dmel_CG42280
gene:FBgn0181822	gene:FBgn0181822	Dsim\GD10047	2R:6511122-6512186	Control	HA	OK	13.741	8.49246	-0.694238	-2.31084	5e-05	0.00203673	yes	Orc6	down	FBgn0181822	FBgn0023180	dme:Dmel_CG1584
gene:FBgn0191347	gene:FBgn0191347	Dsim\GD19858	3R:2028745-2030555	Control	HA	OK	0.576327	0.0549489	-3.39073	-3.72736	0.00045	0.0109804	yes	Osi15	down	FBgn0191347	FBgn0037424	dme:Dmel_CG1157
gene:FBgn0191337	gene:FBgn0191337	Dsim\GD19848	3R:1960960-1963438	Control	HA	OK	3.09422	0.0146674	-7.72082	-5.91177	0.00265	0.0394731	yes	Osi6	down	FBgn0191337	FBgn0027527	dme:Dmel_CG1151
gene:FBgn0268449	gene:FBgn0268449	Dsim\GD27159	3R:1974558-1977239	Control	HA	OK	0.933062	0.0135303	-6.10771	-6.78858	5e-05	0.00203673	yes	Osi7	down	FBgn0268449	FBgn0037414	dme:Dmel_CG1153
gene:FBgn0193700	gene:FBgn0193700	Dsim\GD22292	2L:9905452-9909325	Control	HA	OK	16.5985	12.1648	-0.448343	-1.65279	0.0037	0.0496985	yes	ova	down	FBgn0193700	FBgn0032197	dme:Dmel_CG5694
gene:FBgn0268945	gene:FBgn0268945	Dsim\GD27655	2R:1403915-1425704	Control	HA	OK	9.71315	6.57504	-0.562941	-2.28748	0.0002	0.00581924	yes	p120ctn	down	FBgn0268945	FBgn0260799	dme:Dmel_CG17484
gene:FBgn0189850	gene:FBgn0189850	Dsim\GD18319	3R:19512019-19513212	Control	HA	OK	11.2167	5.41053	-1.0518	-2.98025	5e-05	0.00203673	yes	p38c	down	FBgn0189850	FBgn0267339	dme:Dmel_CG33338
gene:FBgn0188594	gene:FBgn0188594	Dsim\GD17018	X:10666699-10668795	Control	HA	OK	15.7071	11.3701	-0.466173	-1.79155	0.002	0.032775	yes	Pa1	down	FBgn0188594	FBgn0287454	dme:Dmel_CG11750
gene:FBgn0270592	gene:FBgn0270592	Dsim\GD29302	JPYS01002632:2718-4081	Control	HA	OK	10.9676	7.81666	-0.488621	-1.80451	0.00165	0.0286383	yes	Parp	down	FBgn0270592	FBgn0010247	dme:Dmel_CG40411
gene:FBgn0189019	gene:FBgn0189019	Dsim\GD17466	X:18517804-18521977	Control	HA	OK	22.0688	14.4097	-0.614974	-2.39119	0.0002	0.00581924	yes	parvin	down	FBgn0189019	FBgn0052528	dme:Dmel_CG32528
gene:FBgn0184233	gene:FBgn0184233	Dsim\GD12504	3L:15838662-15839627	Control	HA	OK	93.3205	60.3382	-0.629122	-2.48399	5e-05	0.00203673	yes	PDCD-5	down	FBgn0184233	FBgn0036580	dme:Dmel_CG13072
gene:FBgn0184754	gene:FBgn0184754	Dsim\GD13032	3L:7638691-7690612	Control	HA	OK	6.2501	4.48029	-0.480288	-1.98438	0.0026	0.038961	yes	Pdp1	down	FBgn0184754	FBgn0016694	dme:Dmel_CG17888
gene:FBgn0181811	gene:FBgn0181811	Dsim\GD10036	2R:6623081-6623711	Control	HA	OK	14.925	8.91764	-0.742997	-2.02548	0.00095	0.0191535	yes	Pdrg1	down	FBgn0181811	FBgn0033467	dme:Dmel_CG15863
gene:FBgn0193811	gene:FBgn0193811	Dsim\GD22405	2L:8122558-8123041	Control	HA	OK	831.331	608.4	-0.450402	-1.8	0.0034	0.0468028	yes	Peritrophin-15b	down	FBgn0193811	FBgn0040958	dme:Dmel_CG31893
gene:FBgn0186511	gene:FBgn0186511	Dsim\GD14838	3L:19408612-19409467	Control	HA	OK	101.524	61.8343	-0.715343	-3.48887	5e-05	0.00203673	yes	Pfdn6	down	FBgn0186511	FBgn0036918	dme:Dmel_CG7770
gene:FBgn0185418	gene:FBgn0185418	Dsim\GD13712	3L:2664914-2755180	Control	HA	OK	3.50889	2.46175	-0.511332	-1.82993	0.0021	0.0337488	yes	Pgant6	down	FBgn0185418	FBgn0035375	dme:Dmel_CG2103
gene:FBgn0183399	gene:FBgn0183399	Dsim\GD11659	2R:18710281-18712943	Control	HA	OK	132.729	92.1894	-0.525809	-1.88225	0.0017	0.0291512	yes	pgc	down	FBgn0183399	FBgn0016053	dme:Dmel_CG32885
gene:FBgn0270502	gene:FBgn0270502	Dsim\GD29212	X:252364-253739	Control	HA	OK	9.22883	3.93002	-1.23161	-4.2335	5e-05	0.00203673	yes	Pgcl	down	FBgn0270502	FBgn0011822	dme:Dmel_CG13374
gene:FBgn0195190	gene:FBgn0195190	Dsim\GD23820	2L:11732917-11733809	Control	HA	OK	88.5278	48.9804	-0.853925	-3.06694	5e-05	0.00203673	yes	Phae2	down	FBgn0195190	FBgn0263235	dme:Dmel_CG16997
gene:FBgn0067492	gene:FBgn0067492	Dsim\pho	4:962121-966692	Control	HA	OK	16.6045	10.7845	-0.62262	-2.79373	5e-05	0.00203673	yes	pho	down	FBgn0067492	FBgn0002521	dme:Dmel_CG17743
gene:FBgn0186491	gene:FBgn0186491	Dsim\GD14818	3L:19154732-19155767	Control	HA	OK	22.1925	15.1219	-0.553432	-1.73604	0.0029	0.0421895	yes	PIG-F	down	FBgn0186491	FBgn0036893	dme:Dmel_CG9376
gene:FBgn0195061	gene:FBgn0195061	Dsim\GD23684	2L:10041372-10042413	Control	HA	OK	9.36693	5.17192	-0.856877	-3.27704	5e-05	0.00203673	yes	pim	down	FBgn0195061	FBgn0003087	dme:Dmel_CG5052
gene:FBgn0189983	gene:FBgn0189983	Dsim\GD18460	3R:17774609-17776068	Control	HA	OK	10.3438	6.85752	-0.593009	-1.84955	0.00155	0.0274273	yes	pinta	down	FBgn0189983	FBgn0038966	dme:Dmel_CG13848
gene:FBgn0184748	gene:FBgn0184748	Dsim\GD13026	3L:7788021-7790307	Control	HA	OK	13.1948	8.23967	-0.679307	-2.31977	0.0004	0.010005	yes	Pop4	down	FBgn0184748	FBgn0035831	dme:Dmel_CG8038
gene:FBgn0189576	gene:FBgn0189576	Dsim\GD18032	3R:23724387-23743996	Control	HA	OK	7.25121	4.8827	-0.570544	-2.12055	0.00085	0.0175996	yes	Ppn	down	FBgn0189576	FBgn0003137	dme:Dmel_CG33103
gene:FBgn0184627	gene:FBgn0184627	Dsim\GD12902	3L:9434686-9447642	Control	HA	OK	74.8006	50.3292	-0.571654	-1.8351	0.00255	0.0385008	yes	Prps	down	FBgn0184627	FBgn0036030	dme:Dmel_CG6767
gene:FBgn0187675	gene:FBgn0187675	Dsim\GD16035	X:9738296-9740397	Control	HA	OK	9.26024	5.37801	-0.783977	-3.0777	5e-05	0.00203673	yes	Psf3	down	FBgn0187675	FBgn0030196	dme:Dmel_CG2222
gene:FBgn0269426	gene:FBgn0269426	Dsim\GD28136	4:397891-405144	Control	HA	OK	4.05405	2.84526	-0.510805	-1.99836	0.0012	0.0226818	yes	Pur-alpha	down	FBgn0269426	FBgn0022361	dme:Dmel_CG1507
gene:FBgn0193918	gene:FBgn0193918	Dsim\GD22516	2L:6791709-6793148	Control	HA	OK	7.40697	3.91302	-0.920601	-2.51572	0.0001	0.0035265	yes	Rab30	down	FBgn0193918	FBgn0031882	dme:Dmel_CG9100
gene:FBgn0188439	gene:FBgn0188439	Dsim\GD16855	X:7192382-7194259	Control	HA	OK	19.7601	13.2161	-0.580299	-2.42846	0.0001	0.0035265	yes	Rab39	down	FBgn0188439	FBgn0029959	dme:Dmel_CG12156
gene:FBgn0192507	gene:FBgn0192507	Dsim\GD21052	3R:19355863-19358314	Control	HA	OK	70.3168	48.2981	-0.541904	-2.03165	0.0003	0.00809189	yes	Rab7	down	FBgn0192507	FBgn0015795	dme:Dmel_CG5915
gene:FBgn0069498	gene:FBgn0069498	Dsim\Rad23	4:270438-272665	Control	HA	OK	102.702	63.3083	-0.697993	-2.67751	5e-05	0.00203673	yes	Rad23	down	FBgn0069498	FBgn0026777	dme:Dmel_CG1836
gene:FBgn0192310	gene:FBgn0192310	Dsim\GD20849	3R:16436721-16439624	Control	HA	OK	7.1352	3.84093	-0.893497	-1.9452	0.00185	0.0311349	yes	ranshi	down	FBgn0192310	FBgn0037620	dme:Dmel_CG9793
gene:FBgn0183570	gene:FBgn0183570	Dsim\GD11831	2R:20406619-20408940	Control	HA	OK	28.7538	15.7376	-0.869536	-3.92826	5e-05	0.00203673	yes	Rap2l	down	FBgn0183570	FBgn0283666	dme:Dmel_CG3204
gene:FBgn0195047	gene:FBgn0195047	Dsim\GD23670	2L:9941877-9942979	Control	HA	OK	59.9583	39.2749	-0.610352	-2.74685	0.0001	0.0035265	yes	REPTOR-BP	down	FBgn0195047	FBgn0032202	dme:Dmel_CG18619
gene:FBgn0186513	gene:FBgn0186513	Dsim\GD14840	3L:19413634-19417817	Control	HA	OK	44.8578	32.1539	-0.480369	-2.10588	0.00215	0.0343312	yes	RhoGDI	down	FBgn0186513	FBgn0036921	dme:Dmel_CG7823
gene:FBgn0189229	gene:FBgn0189229	Dsim\GD17680	2R:155868-156520	Control	HA	OK	65.7522	47.9386	-0.455852	-1.87706	0.0022	0.0348508	yes	RNASEK	down	FBgn0189229	FBgn0262116	dme:Dmel_CG40127
gene:FBgn0186370	gene:FBgn0186370	Dsim\GD14692	3L:16625409-16631223	Control	HA	OK	9.2514	6.06103	-0.610108	-2.4517	5e-05	0.00203673	yes	rogdi	down	FBgn0186370	FBgn0036697	dme:Dmel_CG7725
gene:FBgn0193775	gene:FBgn0193775	Dsim\GD22369	2L:8691932-8695470	Control	HA	OK	19.6301	13.5845	-0.531101	-2.19543	0.00045	0.0109804	yes	rost	down	FBgn0193775	FBgn0011705	dme:Dmel_CG9552
gene:FBgn0196921	gene:FBgn0196921	Dsim\GD25636	2R:11703448-11704001	Control	HA	OK	81.2172	54.1216	-0.585581	-1.92736	0.00095	0.0191535	yes	Rpb12	down	FBgn0196921	FBgn0262954	dme:Dmel_CG34186
gene:FBgn0191847	gene:FBgn0191847	Dsim\GD20374	3R:10180067-10184002	Control	HA	OK	7.79087	4.44135	-0.810788	-2.61559	0.00025	0.00696927	yes	Rpb7	down	FBgn0191847	FBgn0051155	dme:Dmel_CG31155
gene:FBgn0186661	gene:FBgn0186661	Dsim\GD14989	3L:21139406-21141151	Control	HA	OK	39.2374	23.7852	-0.722167	-2.74359	5e-05	0.00203673	yes	Rpb8	down	FBgn0186661	FBgn0037121	dme:Dmel_CG11246
gene:FBgn0190028	gene:FBgn0190028	Dsim\GD18505	3R:17113437-17115377	Control	HA	OK	6.51836	3.07621	-1.08335	-4.03446	5e-05	0.00203673	yes	RpI12	down	FBgn0190028	FBgn0038903	dme:Dmel_CG13418
gene:FBgn0190464	gene:FBgn0190464	Dsim\GD18953	3R:11072747-11073697	Control	HA	OK	31.6753	20.2811	-0.643225	-2.66726	0.0002	0.00581924	yes	RpII15	down	FBgn0190464	FBgn0004855	dme:Dmel_CG3284
gene:FBgn0191271	gene:FBgn0191271	Dsim\GD19782	3R:1096270-1099144	Control	HA	OK	94.0645	43.6618	-1.10728	-3.1281	5e-05	0.00203673	yes	RpII18	down	FBgn0191271	FBgn0003275	dme:Dmel_CG1163
gene:FBgn0183680	gene:FBgn0183680	Dsim\GD11941	JPYS01003691:2460-3670	Control	HA	OK	3694.47	2342.06	-0.657591	-1.95915	0.0028	0.0410941	yes	RpL15	down	FBgn0183680	FBgn0028697	dme:Dmel_CG17420
gene:FBgn0186930	gene:FBgn0186930	Dsim\GD15262	2R:6759770-6762898	Control	HA	OK	121.107	75.3925	-0.683786	-2.29465	0.00015	0.00464907	yes	RpLP0-like	down	FBgn0186930	FBgn0033485	dme:Dmel_CG1381
gene:FBgn0188783	gene:FBgn0188783	Dsim\GD17220	X:14605001-14605807	Control	HA	OK	38.4001	24.8791	-0.626176	-1.96834	0.0006	0.0138291	yes	Rrp47	down	FBgn0188783	FBgn0030711	dme:Dmel_CG8928
gene:FBgn0183840	gene:FBgn0183840	Dsim\GD12102	3L:21023296-21026865	Control	HA	OK	1.85623	1.1767	-0.657634	-1.7462	0.00255	0.0385008	yes	S1P	down	FBgn0183840	FBgn0037105	dme:Dmel_CG7169
gene:FBgn0193679	gene:FBgn0193679	Dsim\GD22271	2L:10006366-10009340	Control	HA	OK	2.50305	1.45708	-0.780606	-2.16729	0.0005	0.0119378	yes	Schip1	down	FBgn0193679	FBgn0032221	dme:Dmel_CG5375
gene:FBgn0187604	gene:FBgn0187604	Dsim\GD15956	X:11180138-11183191	Control	HA	OK	42.9755	23.4444	-0.874268	-3.16337	5e-05	0.00203673	yes	Sclp	down	FBgn0187604	FBgn0030357	dme:Dmel_CG2471
gene:FBgn0193973	gene:FBgn0193973	Dsim\GD22572	2L:6252020-6255417	Control	HA	OK	117.519	81.9013	-0.520934	-1.87732	0.00185	0.0311349	yes	Sec61alpha	down	FBgn0193973	FBgn0086357	dme:Dmel_CG9539
gene:FBgn0182824	gene:FBgn0182824	Dsim\GD11064	2R:11208569-11209555	Control	HA	OK	518.945	335.515	-0.629208	-2.75197	0.0001	0.0035265	yes	Sec61beta	down	FBgn0182824	FBgn0010638	dme:Dmel_CG10130
gene:FBgn0192161	gene:FBgn0192161	Dsim\GD20695	3R:14388543-14393958	Control	HA	OK	39.3674	20.0939	-0.970239	-2.80547	5e-05	0.00203673	yes	SelR	down	FBgn0192161	FBgn0267376	dme:Dmel_CG6584
gene:FBgn0187079	gene:FBgn0187079	Dsim\GD15412	2R:9965869-9989449	Control	HA	OK	299.45	178.817	-0.743828	-2.00265	0.0012	0.0226818	yes	Ser8	down	FBgn0187079	FBgn0019928	dme:Dmel_CG4812
gene:FBgn0184065	gene:FBgn0184065	Dsim\GD12333	3L:18206910-18208369	Control	HA	OK	41.0429	28.0084	-0.551274	-1.78269	0.0021	0.0337488	yes	Sgf11	down	FBgn0184065	FBgn0036804	dme:Dmel_CG13379
gene:FBgn0270919	gene:FBgn0270919	Dsim\GD29629	3R:20409125-20411109	Control	HA	OK	3.91179	2.43837	-0.681911	-2.06575	0.00045	0.0109804	yes	shams	down	FBgn0270919	FBgn0039273	dme:Dmel_CG9996
gene:FBgn0194418	gene:FBgn0194418	Dsim\GD23027	2L:425723-427279	Control	HA	OK	66.3999	48.339	-0.457993	-1.85168	0.00265	0.0394731	yes	shv	down	FBgn0194418	FBgn0031256	dme:Dmel_CG4164
gene:FBgn0183898	gene:FBgn0183898	Dsim\GD12161	3L:20241822-20245763	Control	HA	OK	9.83047	6.47159	-0.603139	-2.0632	0.00125	0.0233178	yes	Six4	down	FBgn0183898	FBgn0027364	dme:Dmel_CG3871
gene:FBgn0188126	gene:FBgn0188126	Dsim\GD16521	X:461735-463330	Control	HA	OK	69.5106	48.3681	-0.523178	-2.02097	0.00085	0.0175996	yes	SkpA	down	FBgn0188126	FBgn0025637	dme:Dmel_CG16983
gene:FBgn0184189	gene:FBgn0184189	Dsim\GD12460	3L:16182885-16183821	Control	HA	OK	189.353	137.123	-0.465603	-1.78059	0.00235	0.0363612	yes	Smn	down	FBgn0184189	FBgn0036641	dme:Dmel_CG16725
gene:FBgn0193925	gene:FBgn0193925	Dsim\GD22523	2L:6735561-6736417	Control	HA	OK	627.087	354.573	-0.822583	-2.94099	5e-05	0.00203673	yes	smt3	down	FBgn0193925	FBgn0264922	dme:Dmel_CG4494
gene:FBgn0195588	gene:FBgn0195588	Dsim\GD24240	2L:19480279-19509143	Control	HA	OK	1.45214	0.926817	-0.647823	-1.94984	0.00215	0.0343312	yes	sNPF	down	FBgn0195588	FBgn0032840	dme:Dmel_CG13968
gene:FBgn0196742	gene:FBgn0196742	Dsim\GD25447	2R:14256895-14261418	Control	HA	OK	25.3337	17.3718	-0.544313	-1.95404	0.00135	0.0245858	yes	Snx16	down	FBgn0196742	FBgn0034265	dme:Dmel_CG6410
gene:FBgn0185737	gene:FBgn0185737	Dsim\GD14042	3L:7746931-7747828	Control	HA	OK	18.6007	13.2028	-0.494508	-2.29377	0.0012	0.0226818	yes	Srp9	down	FBgn0185737	FBgn0035827	dme:Dmel_CG8268
gene:FBgn0186530	gene:FBgn0186530	Dsim\GD14857	3L:19650010-19679535	Control	HA	OK	68.0604	46.1941	-0.559107	-1.88025	0.00125	0.0233178	yes	Ssk	down	FBgn0186530	FBgn0036945	dme:Dmel_CG6981
gene:FBgn0187644	gene:FBgn0187644	Dsim\GD16000	X:10470914-10472716	Control	HA	OK	386.699	258.618	-0.580386	-2.18365	0.00035	0.00897943	yes	ssp7	down	FBgn0187644	FBgn0052667	dme:Dmel_CG32667
gene:FBgn0196795	gene:FBgn0196795	Dsim\GD25504	2R:13557891-13559580	Control	HA	OK	27.2421	15.9674	-0.770711	-3.18336	5e-05	0.00203673	yes	ste24a	down	FBgn0196795	FBgn0034176	dme:Dmel_CG9000
gene:FBgn0268171	gene:FBgn0268171	Dsim\GD26881	3L:1394945-1398176	Control	HA	OK	12.9226	9.05817	-0.51261	-2.34983	0.00075	0.0163072	yes	stet	down	FBgn0268171	FBgn0020248	dme:Dmel_CG33166
gene:FBgn0269341	gene:FBgn0269341	Dsim\GD28051	2R:1360340-1380324	Control	HA	OK	10.8182	7.43726	-0.540624	-1.99416	0.00065	0.0146433	yes	Stlk	down	FBgn0269341	FBgn0046692	dme:Dmel_CG40293
gene:FBgn0194901	gene:FBgn0194901	Dsim\GD23523	2L:8047675-8048785	Control	HA	OK	6.74773	4.38916	-0.620457	-2.34817	0.00085	0.0175996	yes	strat	down	FBgn0194901	FBgn0032020	dme:Dmel_CG7787
gene:FBgn0195971	gene:FBgn0195971	Dsim\GD24643	X:19635528-19639450	Control	HA	OK	69.844	48.4194	-0.528551	-2.03728	0.0008	0.0169872	yes	Stt3A	down	FBgn0195971	FBgn0031149	dme:Dmel_CG1518
gene:FBgn0186761	gene:FBgn0186761	Dsim\GD15089	3R:5553870-5555084	Control	HA	OK	51.5135	24.8396	-1.05231	-4.51437	5e-05	0.00203673	yes	Surf6	down	FBgn0186761	FBgn0038746	dme:Dmel_CG4510
gene:FBgn0016343	gene:FBgn0016343	Dsim\Sxl	X:6551828-6573063	Control	HA	OK	5.72501	4.0141	-0.512202	-2.1682	0.0012	0.0226818	yes	Sxl	down	FBgn0016343	FBgn0264270	dme:Dmel_CG43770
gene:FBgn0195727	gene:FBgn0195727	Dsim\GD24386	4:260604-269597	Control	HA	OK	3.78649	2.26765	-0.739663	-2.38077	0.0001	0.0035265	yes	Syt7	down	FBgn0195727	FBgn0039900	dme:Dmel_CG2381
[truncated: 14,791 more rows]

## Sheet: Table S3
Table S3: Genes differentially expressed in response to HA in D. sechellia
[truncated: 17,274 more rows]

## Sheet: Table S4
Table S4: Genes differentially expressed in response to HA and OA in D. sechellia
[truncated: 20 more rows]

[truncated: 19 more sheets: Table S5, Table S6, Table S7, Table S8, Table S9, Table S10, Table S11, Table S12, Table S13, Table S14, Table S15, Table S16, Table S17, Table S18, Table S19, Table S20, Table S21, Table S22, Table S23]
